# Supplementary material for: Memory Effects on Movement Behavior in Animal Foraging
Source: PLoS One. 2015 Aug 19;10(8):e0136057. doi: 10.1371/journal.pone.0136057 (PMC4542208; doi:10.1371/journal.pone.0136057)
Supplement: S1 Appendix — (CSV) [file pone.0136057.s004.csv]

RegenRate	Mean	Scale	Long	Short	Factor	SpScale	maxT	pValue	R_K	M_K	M_R	pAdj	R_KAdj	M_KAdj	M_RAdj
0.005	-1.5	2	0	1e-05	10	0.5	6.59100231189535	0	9.9999999999989e-05	0.0246333333333333	0	0	0.00042832861189797	0.0390688111888111	0
0.01	-1.5	2	0	1e-05	10	0.5	6.88071669923141	0	8.88888888889161e-05	0.00901111111111108	0	0	0.000392982456140471	0.0180460927152317	0
0.05	-1.5	2	0	1e-05	10	0.5	6.49141299124858	0	1.11111111110729e-05	0.0646555555555556	0	0	8.78048780484784e-05	0.0849979716024341	0
0.005	-0.5	2	0	1e-05	10	0.5	6.17453788009976	0	0	0.203811111111111	0	0	0	0.230583142144638	0
0.01	-0.5	2	0	1e-05	10	0.5	5.69469842607442	0	0	0.843322222222222	0	0	0	0.853102051739518	0
0.05	-0.5	2	0	1e-05	10	0.5	5.94819851499347	0	0	0.557466666666667	0	0	0	0.577820973269363	0
0.005	1	2	0	1e-05	10	0.5	4.75312666723222	0	0.0448	0.0417777777777778	0	0	0.0625077822208551	0.0597051039697543	0
0.01	1	2	0	1e-05	10	0.5	5.68564485147016	0	0.00718888888888891	0.0153111111111112	0	0	0.0123424678274035	0.02709761997659	0
0.05	1	2	0	1e-05	10	0.5	5.96630566420197	0	2.22222222222568e-05	0.151622222222222	0	0	0.000147584187408721	0.176387076923077	0
0.005	-1.5	10	0	1e-05	10	0.5	5.99346638801473	0	0.104966666666667	8.88888888889161e-05	0	0	0.132125194228635	0.000955450236967117	0
0.01	-1.5	10	0	1e-05	10	0.5	6.17453788009976	0	0.00249999999999995	0.00915555555555558	0	0	0.00521139705882342	0.0182147368421053	0
0.05	-1.5	10	0	1e-05	10	0.5	6.21980575312102	0	0.0252777777777777	0.000466666666666615	0	0	0.0373485342019543	0.00267272727272698	0
0.005	-0.5	10	0	1e-05	10	0.5	5.8667163435552	0	0.00188888888888894	0.0284222222222222	0	0	0.00414915254237299	0.043791847826087	0
0.01	-0.5	10	0	1e-05	10	0.5	5.31444829269584	0	0.000922222222222269	0.168922222222222	0	0	0.00222747603833877	0.19408085106383	0
0.05	-0.5	10	0	1e-05	10	0.5	5.82144847053394	0	0.000277777777777821	0.0982777777777778	0	0	0.000896159317212089	0.120320647773279	0
0.005	1	10	0	1e-05	10	0.5	2.76134025429682	0.0140444444444444	0.7567	0.0981888888888889	0.0136444444444445	0.0144391659111514	0.81979746835443	0.120276748582231	0.0140342857142857
0.01	1	10	0	1e-05	10	0.5	2.59837591142028	0.0237111111111111	0.802488888888889	0.120466666666667	0.0231555555555556	0.0242401622718053	0.832169199178645	0.144064539941998	0.0236828861330327
0.05	1	10	0	1e-05	10	0.5	2.61648306062879	0.0228777777777778	0.131966666666667	0.767777777777778	0.0222777777777777	0.0233935076645627	0.157775645756458	0.780336096795877	0.0227902571041948
0.005	-1.5	2	0	1e-04	10	0.5	6.69964520714637	0	0.000166666666666648	0.0125555555555555	0	0	0.000609186140209441	0.0230948905109489	0
0.01	-1.5	2	0	1e-04	10	0.5	6.87166312462716	0	7.77777777777322e-05	0.00936666666666663	0	0	0.000355287009063236	0.0185452640768223	0
0.05	-1.5	2	0	1e-04	10	0.5	6.78112737858464	0	6.66666666666593e-05	0.0119	0	0	0.000318315789473649	0.0222316309719934	0
0.005	-0.5	2	0	1e-04	10	0.5	6.12021643247425	0	1.11111111110729e-05	0.206255555555556	0	0	8.78048780484784e-05	0.232903958177745	0
0.01	-0.5	2	0	1e-04	10	0.5	5.96630566420197	0	1.11111111110729e-05	0.517088888888889	0	0	8.78048780484784e-05	0.538085615966965	0
0.05	-0.5	2	0	1e-04	10	0.5	6.16548430549551	0	0	0.307622222222222	0	0	0	0.332786644407346	0
0.005	1	2	0	1e-04	10	0.5	4.99757318154702	0	0.0451111111111111	0.0209444444444444	0	0	0.0628645161290322	0.0344967320261438	0
0.01	1	2	0	1e-04	10	0.5	5.50457335938513	0	0.00501111111111108	0.0365	0	0	0.00923624542868746	0.0535113122171945	0
0.05	1	2	0	1e-04	10	0.5	6.22885932772527	0	0.000288888888888894	0.0368777777777778	0	0	0.000922816901408467	0.0539779283639884	0
0.005	-1.5	10	0	1e-04	10	0.5	5.90293064197221	0	0.0864	0.000244444444444492	0	0	0.111814664764622	0.0017627980922102	0
0.01	-1.5	10	0	1e-04	10	0.5	6.15643073089126	0	0.00196666666666667	0.00978888888888885	0	0	0.00428472622478387	0.0191720207253885	0
0.05	-1.5	10	0	1e-04	10	0.5	6.21075217851677	0	0.0237555555555555	0.000611111111111118	0	0	0.0352256292906178	0.00312514092446452	0
0.005	-0.5	10	0	1e-04	10	0.5	5.93914494038922	0	0.00192222222222227	0.0204444444444445	0	0	0.00421014002897162	0.033795918367347	0
0.01	-0.5	10	0	1e-04	10	0.5	5.3597161657171	0	0.00203333333333333	0.0965222222222222	0	0	0.00439618684461391	0.118440681633757	0
0.05	-0.5	10	0	1e-04	10	0.5	5.89387706736796	0	0.000266666666666637	0.0896888888888889	0	0	0.000867096774193453	0.111337931034483	0
0.005	1	10	0	1e-04	10	0.5	1.78355419703761	0.177588888888889	0.787033333333333	0.5016	0.1744	0.178138699690402	0.828489466357308	0.523408695652174	0.175017345132743
0.01	1	10	0	1e-04	10	0.5	3.41319762580295	0.0013	0.705911111111111	0.0215666666666666	0.00123333333333331	0.00137518656716418	0.786049484536082	0.035290909090909	0.00130496850944714
0.05	1	10	0	1e-04	10	0.5	4.01073354968357	8.88888888888889e-05	0.0988111111111111	0.118844444444444	8.88888888889161e-05	9.62980654406496e-05	0.125618609865471	0.142387321711569	9.62061560487052e-05
0.005	-1.5	2	1e-05	1e-04	10	0.5	6.62721661031236	0	4.44444444444025e-05	0.0192777777777777	0	0	0.00023773584905638	0.0322552563629656	0
0.01	-1.5	2	1e-05	1e-04	10	0.5	6.85355597541865	0	8.88888888889161e-05	0.0107333333333334	0	0	0.000392982456140471	0.0205427848101267	0
0.05	-1.5	2	1e-05	1e-04	10	0.5	6.6000558864996	0	3.33333333333297e-05	0.0363222222222223	0	0	0.000196108949416321	0.0533023616952443	0
0.005	-0.5	2	1e-05	1e-04	10	0.5	6.3556093721848	0	0	0.0967333333333333	0	0	0	0.118589837837838	0
0.01	-0.5	2	1e-05	1e-04	10	0.5	6.11116285787	0	0	0.335211111111111	0	0	0	0.359630463576159	0
0.05	-0.5	2	1e-05	1e-04	10	0.5	6.40993081981031	0	0	0.1207	0	0	0	0.144294071146245	0
0.005	1	2	1e-05	1e-04	10	0.5	5.1152696514023	0	0.0489111111111111	0.0122444444444444	0	0	0.0674348936170213	0.0227067865903515	0
0.01	1	2	1e-05	1e-04	10	0.5	4.32760866083239	3.33333333333333e-05	0.00242222222222221	0.511655555555556	3.33333333333297e-05	3.64864864864865e-05	0.00507726432532346	0.533288051470588	3.64776839565702e-05
0.05	1	2	1e-05	1e-04	10	0.5	6.17453788009976	0	0.000155555555555575	0.0607444444444445	0	0	0.000578835110746587	0.0808737305547403	0
0.005	-1.5	10	1e-05	1e-04	10	0.5	5.95725208959772	0	0.1049	0.000155555555555575	0	0	0.132100610771793	0.00133889943074021	0
0.01	-1.5	10	1e-05	1e-04	10	0.5	6.26507362614228	0	0.00304444444444441	0.00454444444444446	0	0	0.00608888888888881	0.0109822056473096	0
0.05	-1.5	10	1e-05	1e-04	10	0.5	6.12021643247425	0	0.0188666666666667	0.000977777777777744	0	0	0.0281788607178137	0.00392843224092103	0
0.005	-0.5	10	1e-05	1e-04	10	0.5	5.32350186730009	0	0.00178888888888884	0.107533333333333	0	0	0.00397764705882342	0.130280769230769	0
0.01	-0.5	10	1e-05	1e-04	10	0.5	5.6222698292404	0	0.00177777777777777	0.0520333333333334	0	0	0.00396070726915518	0.0710485249849489	0
0.05	-0.5	10	1e-05	1e-04	10	0.5	6.10210928326575	0	0.00065555555555552	0.0283666666666667	0	0	0.00166122905027924	0.0437359619306594	0
0.005	1	10	1e-05	1e-04	10	0.5	2.39919727012674	0.0418333333333333	0.781577777777778	0.1934	0.0406888888888889	0.0424415119660031	0.827803544776119	0.219810172889	0.0413081468218442
0.01	1	10	1e-05	1e-04	10	0.5	2.80660812731807	0.0124222222222222	0.767777777777778	0.0846555555555556	0.0121222222222223	0.012788742623695	0.825018044044518	0.105988849020149	0.0124827241770715
0.05	1	10	1e-05	1e-04	10	0.5	3.60332269249224	0.000644444444444444	0.0997	0.264977777777778	0.000577777777777788	0.000686358300070439	0.126571284634761	0.290524697921701	0.000615500234852054
0.005	-1.5	2	0	0.001	10	0.5	6.45519869283157	0	2.22222222222568e-05	0.0511555555555555	0	0	0.000147584187408721	0.0700608695652173	0
0.01	-1.5	2	0	0.001	10	0.5	7.02557389289944	0	0.000144444444444392	0.00313333333333332	0	0	0.00054966442953	0.00837031802120138	0
0.05	-1.5	2	0	0.001	10	0.5	6.69964520714637	0	0.000111111111111062	0.0210444444444444	0	0	0.000457765667574729	0.0345860869565217	0
0.005	-0.5	2	0	0.001	10	0.5	5.71280557528292	0	0	0.718866666666667	0	0	0	0.734079063484917	0
0.01	-0.5	2	0	0.001	10	0.5	5.78523417211693	0	0	0.747522222222222	0	0	0	0.760430769230769	0
0.05	-0.5	2	0	0.001	10	0.5	6.15643073089126	0	0	0.316988888888889	0	0	0	0.341697148288973	0
0.005	1	2	0	0.001	10	0.5	5.25107327046607	0	0.0471777777777778	0.00915555555555558	0	0	0.0654429357798165	0.0182147368421053	0
0.01	1	2	0	0.001	10	0.5	5.77618059751268	0	0.0108222222222222	0.0091	0	0	0.0171882352941176	0.0181599648042235	0
0.05	1	2	0	0.001	10	0.5	5.54984123240639	0	2.22222222222568e-05	0.328822222222222	0	0	0.000147584187408721	0.353157954545455	0
0.005	-1.5	10	0	0.001	10	0.5	5.90293064197221	0	0.0854888888888888	0.000222222222222235	0	0	0.110888647412067	0.00165245901639354	0
0.01	-1.5	10	0	0.001	10	0.5	6.05684141024449	0	0.0023333333333333	0.0133888888888889	0	0	0.00493196644920775	0.0243512429831596	0
0.05	-1.5	10	0	0.001	10	0.5	6.05684141024449	0	0.0173111111111112	0.00151111111111113	0	0	0.0259924528301888	0.00507357512953374	0
0.005	-0.5	10	0	0.001	10	0.5	5.8848234927637	0	0.00217777777777772	0.0256333333333333	0	0	0.00465523091423174	0.0403304890738813	0
0.01	-0.5	10	0	0.001	10	0.5	5.40498403873836	0	0.00225555555555557	0.0768222222222222	0	0	0.00479662447257386	0.0974728951048951	0
0.05	-0.5	10	0	0.001	10	0.5	5.97535923880622	0	0.000422222222222213	0.0555666666666667	0	0	0.00120301507537686	0.0751267958271237	0
0.005	1	10	0	0.001	10	0.5	2.51689373998202	0.0299	0.8015	0.144111111111111	0.0290888888888889	0.0304504714863044	0.832169199178645	0.169042668735454	0.0296377358490567
0.01	1	10	0	0.001	10	0.5	2.25434007645871	0.0622222222222222	0.807488888888889	0.233344444444444	0.0609777777777778	0.0628736912452662	0.833082352941176	0.259487717577838	0.0616574230940705
0.05	1	10	0	0.001	10	0.5	3.57616196867948	0.000544444444444444	0.0996333333333334	0.275655555555556	0.000499999999999945	0.000580535966149506	0.126522060470325	0.301149710982659	0.000533898305084687
0.005	-1.5	2	1e-05	0.001	10	0.5	6.39182367060181	0	1.11111111110729e-05	0.0696	0	0	8.78048780484784e-05	0.0897655956781348	0
0.01	-1.5	2	1e-05	0.001	10	0.5	7.03462746750369	0	0.000244444444444492	0.00305555555555559	0	0	0.00081052631578963	0.00823040380047515	0
0.05	-1.5	2	1e-05	0.001	10	0.5	6.5819487372911	0	2.22222222222568e-05	0.0401555555555556	0	0	0.000147584187408721	0.0577140684410647	0
0.005	-0.5	2	1e-05	0.001	10	0.5	6.03873426103599	0	0	0.327333333333333	0	0	0	0.351844549763033	0
0.01	-0.5	2	1e-05	0.001	10	0.5	6.02062711182748	0	0	0.436933333333333	0	0	0	0.46123565278101	0
0.05	-0.5	2	1e-05	0.001	10	0.5	6.26507362614228	0	0	0.220455555555556	0	0	0	0.246666600888012	0
0.005	1	2	1e-05	0.001	10	0.5	5.3959304641341	0	0.0506222222222222	0.0049555555555556	0	0	0.0694562613430127	0.0116649714582253	0
0.01	1	2	1e-05	0.001	10	0.5	5.79428774672119	0	0.00861111111111112	0.00861111111111112	0	0	0.0142036363636364	0.0174375	0
0.05	1	2	1e-05	0.001	10	0.5	6.28318077535079	0	0.000466666666666615	0.0236111111111111	0	0	0.00128290909090895	0.0378311550688803	0
0.005	-1.5	10	1e-05	0.001	10	0.5	6.00251996261898	0	0.108488888888889	7.77777777777322e-05	0	0	0.135379807427785	0.000902301790280801	0
0.01	-1.5	10	1e-05	0.001	10	0.5	6.10210928326575	0	0.00202222222222226	0.0113222222222222	0	0	0.00437633587786267	0.0213722846441948	0
0.05	-1.5	10	1e-05	0.001	10	0.5	6.0930557086615	0	0.0178777777777778	0.00116666666666665	0	0	0.026790089197225	0.00429197080291964	0
0.005	-0.5	10	1e-05	0.001	10	0.5	5.77618059751268	0	0.00268888888888885	0.0262555555555556	0	0	0.00554148114493404	0.0410673103448276	0
0.01	-0.5	10	1e-05	0.001	10	0.5	4.98851960694277	0	0.000399999999999956	0.406255555555556	0	0	0.00115788130185054	0.430856955810147	0
0.05	-0.5	10	1e-05	0.001	10	0.5	6.08400213405725	0	0.000511111111111129	0.0340555555555555	0	0	0.00136617560400712	0.0504823529411764	0
0.005	1	10	1e-05	0.001	10	0.5	2.56216161300327	0.0265444444444444	0.716477777777778	0.174788888888889	0.0260666666666667	0.0270756914774005	0.794218768328446	0.200516540212443	0.0266003149606299
0.01	1	10	1e-05	0.001	10	0.5	3.21401898450941	0.00333333333333333	0.868111111111111	0.0174111111111112	0.00324444444444449	0.0034919168591224	0.871569721115538	0.0298363430298452	0.00339722991689756
0.05	1	10	1e-05	0.001	10	0.5	3.62142984170074	0.000511111111111111	0.104033333333333	0.247044444444444	0.000488888888888872	0.00054589121732988	0.131191326105088	0.272584188761858	0.000522279792746096
0.005	-1.5	2	1e-04	0.001	10	0.5	6.68153805793787	0	0.000166666666666648	0.0133555555555556	0	0	0.000609186140209441	0.0243198715375351	0
0.01	-1.5	2	1e-04	0.001	10	0.5	6.99841316908668	0	0.000211111111111162	0.00403333333333333	0	0	0.000728767123287846	0.0100911196911197	0
0.05	-1.5	2	1e-04	0.001	10	0.5	6.74491308016763	0	2.22222222222568e-05	0.0150777777777777	0	0	0.000147584187408721	0.0267472819710598	0
0.005	-0.5	2	1e-04	0.001	10	0.5	6.1292700070785	0	0	0.242533333333333	0	0	0	0.268324682926829	0
0.01	-0.5	2	1e-04	0.001	10	0.5	6.14737715628701	0	0	0.313511111111111	0	0	0	0.338430842455973	0
0.05	-0.5	2	1e-04	0.001	10	0.5	5.89387706736796	0	0	0.627066666666667	0	0	0	0.645275499092559	0
0.005	1	2	1e-04	0.001	10	0.5	5.25107327046607	0	0.0427	0.00988888888888884	0	0	0.0599094339622641	0.0192929032258063	0
0.01	1	2	1e-04	0.001	10	0.5	5.66753770226166	0	0.00839999999999996	0.0141444444444444	0	0	0.0139263157894736	0.0254599999999999	0
0.05	1	2	1e-04	0.001	10	0.5	6.13832358168276	0	6.66666666666593e-05	0.0686333333333333	0	0	0.000318315789473649	0.0888219115549215	0
0.005	-1.5	10	1e-04	0.001	10	0.5	5.80334132132544	0	0.0938888888888889	0.000288888888888894	0	0	0.120067662813645	0.00192705882352945	0
0.01	-1.5	10	1e-04	0.001	10	0.5	6.01157353722323	0	0.00172222222222218	0.0169666666666667	0	0	0.00386541316180099	0.0292182232346242	0
0.05	-1.5	10	1e-04	0.001	10	0.5	6.08400213405725	0	0.0172333333333333	0.00121111111111116	0	0	0.025884238410596	0.00438086124401933	0
0.005	-0.5	10	1e-04	0.001	10	0.5	5.65848412765741	0	0.00103333333333333	0.0659222222222222	0	0	0.00246047244094488	0.0861986739694436	0
0.01	-0.5	10	1e-04	0.001	10	0.5	5.50457335938513	0	0.00301111111111108	0.0497555555555556	0	0	0.00603019867549662	0.0686408759124087	0
0.05	-0.5	10	1e-04	0.001	10	0.5	5.90293064197221	0	0.000311111111111151	0.0752777777777778	0	0	0.000973913043478385	0.0958618753509265	0
0.005	1	10	1e-04	0.001	10	0.5	3.07821536544563	0.00507777777777778	0.737544444444444	0.0509111111111111	0.00491111111111109	0.00528275229357798	0.80906931076179	0.0697682175226586	0.00511052993805916
0.01	1	10	1e-04	0.001	10	0.5	2.49878659077351	0.0314	0.729511111111111	0.1899	0.0306444444444445	0.0319709090909091	0.804537417943107	0.216048758465011	0.0312156299124186
0.05	1	10	1e-04	0.001	10	0.5	3.50373337184547	8e-04	0.128522222222222	0.255377777777778	0.000788888888888839	0.000850433559878135	0.154594749403341	0.281027074235808	0.000838425492033687
0.005	-1.5	2	0	0.01	10	0.5	6.78112737858464	0	0.000266666666666637	0.00736666666666663	0	0	0.000867096774193453	0.0154771653543306	0
0.01	-1.5	2	0	0.01	10	0.5	6.77207380398039	0	6.66666666666593e-05	0.0180222222222223	0	0	0.000318315789473649	0.030674971857411	0
0.05	-1.5	2	0	0.01	10	0.5	6.70869878175062	0	3.33333333333297e-05	0.0191888888888889	0	0	0.000196108949416321	0.0321777449168208	0
0.005	-0.5	2	0	0.01	10	0.5	6.07494855945299	0	0	0.289322222222222	0	0	0	0.314942548596112	0
0.01	-0.5	2	0	0.01	10	0.5	6.00251996261898	0	0	0.473566666666667	0	0	0	0.495982082659894	0
0.05	-0.5	2	0	0.01	10	0.5	6.46425226743582	0	0	0.0958444444444444	0	0	0	0.1177866160932	0
0.005	1	2	0	0.01	10	0.5	4.95230530852576	0	0.0427	0.0248666666666667	0	0	0.0599094339622641	0.0393563154221913	0
0.01	1	2	0	0.01	10	0.5	5.33255544190434	0	0.00758888888888887	0.0429111111111111	0	0	0.0129022488755622	0.0609914187284686	0
0.05	1	2	0	0.01	10	0.5	5.78523417211693	0	2.22222222222568e-05	0.3081	0	0	0.000147584187408721	0.333224034334764	0
0.005	-1.5	10	0	0.01	10	0.5	6.12021643247425	0	0.138622222222222	2.22222222222568e-05	0	0	0.164303736608309	0.000473239436620454	0
0.01	-1.5	10	0	0.01	10	0.5	6.25602005153803	0	0.00318888888888891	0.0053333333333333	0	0	0.00634142919772034	0.0122677484787018	0
0.05	-1.5	10	0	0.01	10	0.5	6.46425226743582	0	0.0479555555555555	1.11111111110729e-05	0	0	0.0663594874923734	0.000359999999998761	0
0.005	-0.5	10	0	0.01	10	0.5	5.72185914988717	0	0.00167777777777778	0.0451111111111111	0	0	0.00378815331010453	0.0635280968643278	0
0.01	-0.5	10	0	0.01	10	0.5	5.27823399427883	0	0.00113333333333332	0.156133333333333	0	0	0.00267332293291728	0.181176976208749	0
0.05	-0.5	10	0	0.01	10	0.5	5.95725208959772	0	0.00068888888888885	0.0429333333333334	0	0	0.00173215077605312	0.0609914187284686	0
0.005	1	10	0	0.01	10	0.5	3.60332269249224	0.000722222222222222	0.756577777777778	0.0087666666666667	0.000700000000000034	0.000768292682926829	0.81979746835443	0.0177050756901158	0.000744652908067578
0.01	1	10	0	0.01	10	0.5	2.9152510225691	0.00903333333333333	0.734611111111111	0.0761555555555555	0.00884444444444443	0.00933375854214123	0.807413617639932	0.0967352562307477	0.00914066985645932
0.05	1	10	0	0.01	10	0.5	4.20085861637286	2.22222222222222e-05	0.106022222222222	0.0714111111111111	2.22222222222568e-05	2.44541484716157e-05	0.132923383084577	0.0915547767100056	2.44541484716538e-05
0.005	-1.5	2	1e-05	0.01	10	0.5	6.66343090872936	0	9.9999999999989e-05	0.0157333333333334	0	0	0.00042832861189797	0.027629268292683	0
0.01	-1.5	2	1e-05	0.01	10	0.5	6.68153805793787	0	2.22222222222568e-05	0.0306999999999999	0	0	0.000147584187408721	0.0466048192771084	0
0.05	-1.5	2	1e-05	0.01	10	0.5	6.67248448333362	0	2.22222222222568e-05	0.0241888888888889	0	0	0.000147584187408721	0.0384985263157895	0
0.005	-0.5	2	1e-05	0.01	10	0.5	6.19264502930827	0	0	0.189655555555556	0	0	0	0.215824786753638	0
0.01	-0.5	2	1e-05	0.01	10	0.5	6.40993081981031	0	2.22222222222568e-05	0.114711111111111	0	0	0.000147584187408721	0.138018461538462	0
0.05	-0.5	2	1e-05	0.01	10	0.5	6.41898439441456	0	1.11111111110729e-05	0.117666666666667	0	0	8.78048780484784e-05	0.1412	0
0.005	1	2	1e-05	0.01	10	0.5	5.66753770226166	0	0.0764222222222222	0.000788888888888839	0	0	0.100217172593235	0.00352204724409427	0
0.01	1	2	1e-05	0.01	10	0.5	5.76712702290843	0	0.0129888888888889	0.00683333333333336	0	0	0.0201427692307693	0.014648393194707	0
0.05	1	2	1e-05	0.01	10	0.5	5.92103779118071	0	0.000111111111111062	0.136766666666667	0	0	0.000457765667574729	0.161342901716069	0
0.005	-1.5	10	1e-05	0.01	10	0.5	6.16548430549551	0	0.155433333333333	2.22222222222568e-05	0	0	0.180827289048474	0.000473239436620454	0
0.01	-1.5	10	1e-05	0.01	10	0.5	5.94819851499347	0	0.00286666666666668	0.0148111111111111	0	0	0.00581538461538465	0.0263877454831108	0
0.05	-1.5	10	1e-05	0.01	10	0.5	6.29223434995504	0	0.0357333333333333	0.000288888888888894	0	0	0.051179791600884	0.00192705882352945	0
0.005	-0.5	10	1e-05	0.01	10	0.5	5.77618059751268	0	0.00241111111111114	0.0288222222222222	0	0	0.00505864939870497	0.0442578199052132	0
0.01	-0.5	10	1e-05	0.01	10	0.5	5.07000177838104	0	0.00139999999999996	0.218955555555556	0	0	0.00322682926829258	0.24510918065153	0
0.05	-0.5	10	1e-05	0.01	10	0.5	5.70375200067867	0	0.000199999999999978	0.171766666666667	0	0	0.000698921417565408	0.197249012658228	0
0.005	1	10	1e-05	0.01	10	0.5	3.48562622263696	0.000966666666666667	0.767722222222222	0.0125777777777778	0.000922222222222269	0.00102568421052632	0.825018044044518	0.023117017828201	0.00097875526438938
0.01	1	10	1e-05	0.01	10	0.5	2.29055437487572	0.0556222222222222	0.811422222222222	0.213988888888889	0.0542333333333334	0.0562421756576014	0.834665943012212	0.240439336140699	0.0548745036805711
0.05	1	10	1e-05	0.01	10	0.5	4.26423363860262	1.11111111111111e-05	0.101266666666667	0.0638888888888889	1.11111111110729e-05	1.23287671232877e-05	0.128272996369729	0.0841463414634146	1.23257520175658e-05
0.005	-1.5	2	1e-04	0.01	10	0.5	6.67248448333362	0	0.000144444444444392	0.0147333333333334	0	0	0.00054966442953	0.0262801415650807	0
0.01	-1.5	2	1e-04	0.01	10	0.5	6.95314529606542	0	0.000144444444444392	0.00523333333333331	0	0	0.00054966442953	0.0120929190015282	0
0.05	-1.5	2	1e-04	0.01	10	0.5	6.77207380398039	0	0.000111111111111062	0.0122444444444444	0	0	0.000457765667574729	0.0227067865903515	0
0.005	-0.5	2	1e-04	0.01	10	0.5	6.26507362614228	0	0	0.142133333333333	0	0	0	0.166895366295625	0
0.01	-0.5	2	1e-04	0.01	10	0.5	6.30128792455929	0	1.11111111110729e-05	0.181466666666667	0	0	8.78048780484784e-05	0.207547352496218	0
0.05	-0.5	2	1e-04	0.01	10	0.5	6.34655579758055	0	0	0.157866666666667	0	0	0	0.182954317833419	0
0.005	1	2	1e-04	0.01	10	0.5	5.6222698292404	0	0.0590222222222222	0.00139999999999996	0	0	0.0789748672566371	0.00485504587155948	0
0.01	1	2	1e-04	0.01	10	0.5	5.93009136578496	0	0.0132888888888889	0.00394444444444442	0	0	0.0205168141592921	0.00990697674418598	0
0.05	1	2	1e-04	0.01	10	0.5	5.75807344830418	0	9.9999999999989e-05	0.1523	0	0	0.00042832861189797	0.177045822655049	0
0.005	-1.5	10	1e-04	0.01	10	0.5	5.85766276895095	0	0.103711111111111	0.000133333333333319	0	0	0.130871766342142	0.00122926829268279	0
0.01	-1.5	10	1e-04	0.01	10	0.5	6.41898439441456	0	0.00583333333333336	0.00158888888888886	0	0	0.0104543658632952	0.00525306122448971	0
0.05	-1.5	10	1e-04	0.01	10	0.5	6.25602005153803	0	0.0263444444444444	0.000366666666666626	0	0	0.0387730045425048	0.00226285714285689	0
0.005	-0.5	10	1e-04	0.01	10	0.5	5.97535923880622	0	0.00264444444444445	0.0149888888888889	0	0	0.00547226277372264	0.0266104109589042	0
0.01	-0.5	10	1e-04	0.01	10	0.5	5.83955561974244	0	0.00174444444444444	0.0280666666666667	0	0	0.00390562685093779	0.0433618528610355	0
0.05	-0.5	10	1e-04	0.01	10	0.5	6.01157353722323	0	0.000588888888888861	0.0419777777777778	0	0	0.00152902117916421	0.059821300659755	0
0.005	1	10	1e-04	0.01	10	0.5	1.31276831761652	0.394066666666667	0.905544444444444	0.651033333333333	0.389044444444444	0.394240494044993	0.906343689320388	0.668573058637084	0.389216056462285
0.01	1	10	1e-04	0.01	10	0.5	3.28644758134342	0.00195555555555556	0.776055555555555	0.0224555555555556	0.00183333333333335	0.00206048780487805	0.827474649204864	0.0364300429184549	0.00193170731707319
0.05	1	10	1e-04	0.01	10	0.5	3.25928685753067	0.00244444444444444	0.0943888888888889	0.454811111111111	0.00237777777777781	0.00256904541241891	0.120605070422535	0.47877075887677	0.00249898053753479
0.005	-1.5	2	0.001	0.01	10	0.5	6.74491308016763	0	0.000122222222222246	0.00891111111111109	0	0	0.000488028169014179	0.0179249667405765	0
0.01	-1.5	2	0.001	0.01	10	0.5	7.14327036275471	0	0.000344444444444481	0.00135555555555555	0	0	0.00103813953488383	0.00475545243619489	0
0.05	-1.5	2	0.001	0.01	10	0.5	6.80828810239739	0	8.88888888889161e-05	0.0101555555555556	0	0	0.000392982456140471	0.0196777445536096	0
0.005	-0.5	2	0.001	0.01	10	0.5	6.42803796901882	0	5.55555555555864e-05	0.0688222222222222	0	0	0.000276013143483176	0.0889648332858364	0
0.01	-0.5	2	0.001	0.01	10	0.5	6.16548430549551	0	0	0.294122222222222	0	0	0	0.319545894182428	0
0.05	-0.5	2	0.001	0.01	10	0.5	6.02968068643173	0	0	0.460544444444444	0	0	0	0.484132004634994	0
0.005	1	2	0.001	0.01	10	0.5	5.85766276895095	0	0.0835333333333333	0.000288888888888894	0	0	0.108818839747272	0.00192705882352945	0
0.01	1	2	0.001	0.01	10	0.5	5.8486091943467	0	0.0105	0.0062444444444445	0	0	0.0167527259936686	0.0137033381712628	0
0.05	1	2	0.001	0.01	10	0.5	6.19264502930827	0	0.000199999999999978	0.0444333333333333	0	0	0.000698921417565408	0.0628271820448878	0
0.005	-1.5	10	0.001	0.01	10	0.5	6.04778783564024	0	0.117477777777778	2.22222222222568e-05	0	0	0.144060340632603	0.000473239436620454	0
0.01	-1.5	10	0.001	0.01	10	0.5	6.47330584204007	0	0.00646666666666662	0.000922222222222269	0	0	0.0113560975609755	0.00382726440988125	0
0.05	-1.5	10	0.001	0.01	10	0.5	6.22885932772527	0	0.0269	0.000199999999999978	0	0	0.0395009388151506	0.0015376271186439	0
0.005	-0.5	10	0.001	0.01	10	0.5	5.56794838161489	0	0.00170000000000003	0.0644666666666667	0	0	0.00382879841112222	0.0847842273122644	0
0.01	-0.5	10	0.001	0.01	10	0.5	5.61321625463615	0	0.00132222222222222	0.0672777777777778	0	0	0.00307254098360656	0.0875170633782621	0
0.05	-0.5	10	0.001	0.01	10	0.5	5.93009136578496	0	0.000711111111111107	0.0439000000000001	0	0	0.00177621145374448	0.0622088097469541	0
0.005	1	10	0.001	0.01	10	0.5	2.73417953048406	0.0157888888888889	0.787577777777778	0.0935222222222222	0.0153444444444445	0.0161959294436906	0.828683089770355	0.115495997821944	0.015747149321267
0.01	1	10	0.001	0.01	10	0.5	2.97862604479886	0.00755555555555556	0.858011111111111	0.0348555555555555	0.00729999999999997	0.00783180987202925	0.864107104795737	0.051366081871345	0.00757037037037034
0.05	1	10	0.001	0.01	10	0.5	4.12843001953885	5.55555555555556e-05	0.0955333333333334	0.0955333333333334	3.33333333333297e-05	6.05042016806723e-05	0.121964311849142	0.11753165174939	3.64776839565702e-05
0.005	-1.5	2	0	0.1	10	0.5	6.47330584204007	0	4.44444444444025e-05	0.0474666666666667	0	0	0.00023773584905638	0.0661877651398709	0
0.01	-1.5	2	0	0.1	10	0.5	6.98935959448243	0	0.000166666666666648	0.00449999999999995	0	0	0.000609186140209441	0.0108922091782283	0
0.05	-1.5	2	0	0.1	10	0.5	6.77207380398039	0	3.33333333333297e-05	0.0125666666666666	0	0	0.000196108949416321	0.0231059586542358	0
0.005	-0.5	2	0	0.1	10	0.5	6.16548430549551	0	0	0.213222222222222	0	0	0	0.239696654275093	0
0.01	-0.5	2	0	0.1	10	0.5	6.31034149916354	0	0	0.174511111111111	0	0	0	0.200248520111308	0
0.05	-0.5	2	0	0.1	10	0.5	6.14737715628701	0	1.11111111110729e-05	0.328866666666667	0	0	8.78048780484784e-05	0.353157954545455	0
0.005	1	2	0	0.1	10	0.5	5.64943055305316	0	0.0605555555555556	0.00137777777777781	0	0	0.0806222483122983	0.00481108545034654	0
0.01	1	2	0	0.1	10	0.5	5.50457335938513	0	0.0145222222222222	0.0145222222222222	0	0	0.0221346774193548	0.025964840362633	0
0.05	1	2	0	0.1	10	0.5	6.07494855945299	0	6.66666666666593e-05	0.0994222222222222	0	0	0.000318315789473649	0.12160409813966	0
0.005	-1.5	10	0	0.1	10	0.5	6.05684141024449	0	0.122355555555556	7.77777777777322e-05	0	0	0.148715112540193	0.000902301790280801	0
0.01	-1.5	10	0	0.1	10	0.5	5.79428774672119	0	0.00397777777777775	0.0175	0	0	0.00762926004228324	0.0299660249150622	0
0.05	-1.5	10	0	0.1	10	0.5	5.94819851499347	0	0.0363	0.000833333333333353	0	0	0.0519094577553594	0.00363811357074118	0
0.005	-0.5	10	0	0.1	10	0.5	5.66753770226166	0	0.00160000000000005	0.0513555555555556	0	0	0.00364154540893136	0.0702711312217195	0
0.01	-0.5	10	0	0.1	10	0.5	5.66753770226166	0	0.00164444444444445	0.0506222222222222	0	0	0.00372773613193404	0.0694867513611616	0
0.05	-0.5	10	0	0.1	10	0.5	6.05684141024449	0	0.00072222222222218	0.033	0	0	0.00180098955470028	0.0492556762092794	0
0.005	1	10	0	0.1	10	0.5	1.03210750488471	0.562155555555556	0.877322222222222	0.851988888888889	0.556455555555555	0.562155555555556	0.879454939226519	0.861292979719189	0.556455555555555
0.01	1	10	0	0.1	10	0.5	2.9333581717776	0.00763333333333333	0.7448	0.0682777777777778	0.00736666666666663	0.00790881681132937	0.812630303030303	0.0884627249357326	0.00763775999999996
0.05	1	10	0	0.1	10	0.5	4.49962657831317	1.11111111111111e-05	0.105466666666667	0.0328111111111111	0	1.23287671232877e-05	0.132630108123094	0.0490059927560092	0
0.005	-1.5	2	1e-05	0.1	10	0.5	6.71775235635487	0	0.000177777777777832	0.0114111111111111	0	0	0.000638479809976443	0.0215221621621622	0
0.01	-1.5	2	1e-05	0.1	10	0.5	6.90787742304416	0	0.000133333333333319	0.00698888888888893	0	0	0.000519587628865922	0.0148973684210527	0
0.05	-1.5	2	1e-05	0.1	10	0.5	6.74491308016763	0	7.77777777777322e-05	0.0147333333333334	0	0	0.000355287009063236	0.0262801415650807	0
0.005	-0.5	2	1e-05	0.1	10	0.5	5.8667163435552	0	0	0.5273	0	0	0	0.547831607879065	0
0.01	-0.5	2	1e-05	0.1	10	0.5	5.98441281341047	0	0	0.498544444444444	0	0	0	0.520339990796134	0
0.05	-0.5	2	1e-05	0.1	10	0.5	6.39182367060181	0	0	0.1321	0	0	0	0.156532288401254	0
0.005	1	2	1e-05	0.1	10	0.5	5.33255544190434	0	0.0574444444444444	0.00531111111111116	0	0	0.0773657957244655	0.012235246317928	0
0.01	1	2	1e-05	0.1	10	0.5	6.01157353722323	0	0.0158444444444444	0.0023333333333333	0	0	0.0239249001331558	0.00673282442748082	0
0.05	1	2	1e-05	0.1	10	0.5	6.18359145470402	0	8.88888888889161e-05	0.0553333333333333	0	0	0.000392982456140471	0.0748782816229117	0
0.005	-1.5	10	1e-05	0.1	10	0.5	5.63132340384465	0	0.126144444444444	0.000399999999999956	0	0	0.152381145139814	0.00241276595744654	0
0.01	-1.5	10	1e-05	0.1	10	0.5	6.25602005153803	0	0.00657777777777779	0.00215555555555558	0	0	0.0115066718087158	0.00639895287958122	0
0.05	-1.5	10	1e-05	0.1	10	0.5	6.21980575312102	0	0.0286777777777778	0.00041111111111114	0	0	0.0419620645161291	0.00246015831134582	0
0.005	-0.5	10	1e-05	0.1	10	0.5	6.02062711182748	0	0.00362222222222219	0.00988888888888884	0	0	0.00703055198973037	0.0192929032258063	0
0.01	-0.5	10	1e-05	0.1	10	0.5	5.65848412765741	0	0.00186666666666668	0.0499888888888889	0	0	0.00411628585318429	0.0688999088422971	0
0.05	-0.5	10	1e-05	0.1	10	0.5	6.01157353722323	0	0.000600000000000045	0.0363777777777777	0	0	0.0015472427515635	0.0533656644034918	0
0.005	1	10	1e-05	0.1	10	0.5	2.26339365106296	0.0590666666666667	0.796322222222222	0.235255555555556	0.0576444444444445	0.0597117004680187	0.831837353549276	0.26103698630137	0.0583129348795719
0.01	1	10	1e-05	0.1	10	0.5	2.67985808285855	0.0177	0.8041	0.0994333333333334	0.0170444444444444	0.0181358030268805	0.832169199178645	0.12160409813966	0.017472
0.05	1	10	1e-05	0.1	10	0.5	4.24612648939412	2.22222222222222e-05	0.109411111111111	0.0609111111111111	2.22222222222568e-05	2.44541484716157e-05	0.136230798792204	0.0810718309859155	2.44541484716538e-05
0.005	-1.5	2	1e-04	0.1	10	0.5	6.48235941664433	0	3.33333333333297e-05	0.0445111111111111	0	0	0.000196108949416321	0.0628979439252336	0
0.01	-1.5	2	1e-04	0.1	10	0.5	7.04368104210794	0	0.000244444444444492	0.00287777777777776	0	0	0.00081052631578963	0.00789214026602171	0
0.05	-1.5	2	1e-04	0.1	10	0.5	6.55478801347834	0	2.22222222222568e-05	0.0458111111111111	0	0	0.000147584187408721	0.0642744200433035	0
0.005	-0.5	2	1e-04	0.1	10	0.5	6.36466294678905	0	1.11111111110729e-05	0.0916888888888889	0	0	8.78048780484784e-05	0.113541031941032	0
0.01	-0.5	2	1e-04	0.1	10	0.5	5.99346638801473	0	0	0.485333333333333	0	0	0	0.507953853253346	0
0.05	-0.5	2	1e-04	0.1	10	0.5	6.23791290232953	0	0	0.239488888888889	0	0	0	0.26528	0
0.005	1	2	1e-04	0.1	10	0.5	5.89387706736796	0	0.0886777777777777	0.000266666666666637	0	0	0.114190405904059	0.00184390243902419	0
0.01	1	2	1e-04	0.1	10	0.5	5.51362693398938	0	0.00849999999999995	0.0217000000000001	0	0	0.0140510204081632	0.0354579250720462	0
0.05	1	2	1e-04	0.1	10	0.5	5.85766276895095	0	0	0.207244444444444	0	0	0	0.233845970149254	0
0.005	-1.5	10	1e-04	0.1	10	0.5	5.90293064197221	0	0.117133333333333	0.000133333333333319	0	0	0.143715661347038	0.00122926829268279	0
0.01	-1.5	10	1e-04	0.1	10	0.5	5.95725208959772	0	0.0056222222222222	0.00690000000000002	0	0	0.0101401192842942	0.0147633962264151	0
0.05	-1.5	10	1e-04	0.1	10	0.5	6.15643073089126	0	0.0257333333333334	0.000700000000000034	0	0	0.0379598048780489	0.00334583772392008	0
0.005	-0.5	10	1e-04	0.1	10	0.5	5.79428774672119	0	0.00219999999999998	0.0325666666666666	0	0	0.00469388523047973	0.0486889914304548	0
0.01	-0.5	10	1e-04	0.1	10	0.5	5.53173408319788	0	0.00272222222222218	0.0552333333333334	0	0	0.005587330316742	0.0747652641002686	0
0.05	-0.5	10	1e-04	0.1	10	0.5	5.78523417211693	0	0.000244444444444492	0.101133333333333	0	0	0.00081052631578963	0.123350578112396	0
0.005	1	10	1e-04	0.1	10	0.5	3.10537608925839	0.00465555555555556	0.812988888888889	0.0310777777777778	0.00457777777777779	0.00485016077170418	0.834665943012212	0.0470209472981988	0.00476803673938004
0.01	1	10	1e-04	0.1	10	0.5	2.75228667969256	0.0148888888888889	0.838877777777778	0.0711555555555555	0.0145555555555555	0.0152865550022635	0.850312759776536	0.0913045544554455	0.0149477020602219
0.05	1	10	1e-04	0.1	10	0.5	4.23707291478987	2.22222222222222e-05	0.144788888888889	0.0455222222222222	2.22222222222568e-05	2.44541484716157e-05	0.170278039927405	0.063968029739777	2.44541484716538e-05
0.005	-1.5	2	0.001	0.1	10	0.5	6.89882384843991	0	0.000366666666666626	0.00305555555555559	0	0	0.00108351791530933	0.00823040380047515	0
0.01	-1.5	2	0.001	0.1	10	0.5	7.06178819131645	0	0.000211111111111162	0.00229999999999997	0	0	0.000728767123287846	0.00666632587859416	0
0.05	-1.5	2	0.001	0.1	10	0.5	6.83544882621015	0	0.000155555555555575	0.00846666666666662	0	0	0.000578835110746587	0.0172450830713964	0
0.005	-0.5	2	0.001	0.1	10	0.5	6.5819487372911	0	4.44444444444025e-05	0.0299333333333334	0	0	0.00023773584905638	0.0456548755884331	0
0.01	-0.5	2	0.001	0.1	10	0.5	5.79428774672119	0	0	0.731333333333333	0	0	0	0.745466966292135	0
0.05	-0.5	2	0.001	0.1	10	0.5	6.38277009599756	0	0	0.1359	0	0	0	0.160531875	0
0.005	1	2	0.001	0.1	10	0.5	6.01157353722323	0	0.110511111111111	6.66666666666593e-05	0	0	0.137261336254107	0.000833057851239578	0
0.01	1	2	0.001	0.1	10	0.5	5.46835906096812	0	0.00816666666666666	0.0265555555555556	0	0	0.0136291390728477	0.041408044001375	0
0.05	1	2	0.001	0.1	10	0.5	6.17453788009976	0	8.88888888889161e-05	0.0622333333333334	0	0	0.000392982456140471	0.0824928112215079	0
0.005	-1.5	10	0.001	0.1	10	0.5	6.01157353722323	0	0.111166666666667	8.88888888889161e-05	0	0	0.13793829321663	0.000955450236967117	0
0.01	-1.5	10	0.001	0.1	10	0.5	6.56384158808259	0	0.00945555555555555	0.000455555555555542	0	0	0.0152961483594864	0.0026458386683738	0
0.05	-1.5	10	0.001	0.1	10	0.5	6.50046656585283	0	0.0532555555555555	3.33333333333297e-05	0	0	0.0724556688662267	0.000579310344827522	0
0.005	-0.5	10	0.001	0.1	10	0.5	6.11116285787	0	0.00349999999999995	0.00836666666666663	0	0	0.00683720930232548	0.0171028391167192	0
0.01	-0.5	10	0.001	0.1	10	0.5	5.52268050859363	0	0.0029555555555556	0.0536777777777778	0	0	0.00594255319148945	0.0729426003594968	0
0.05	-0.5	10	0.001	0.1	10	0.5	5.96630566420197	0	0.000333333333333297	0.0594777777777777	0	0	0.00101612903225795	0.0793970570924072	0
0.005	1	10	0.001	0.1	10	0.5	3.65764414011775	0.000388888888888889	0.785277777777778	0.00617777777777773	0.00037777777777781	0.00041623407267579	0.828489466357308	0.0136097134531325	0.000404246284501096
0.01	1	10	0.001	0.1	10	0.5	2.77039382890107	0.0139111111111111	0.778888888888889	0.0887333333333333	0.0135222222222222	0.0143053275901156	0.827474649204864	0.110212048192771	0.0139117260149694
0.05	1	10	0.001	0.1	10	0.5	5.30539471809159	0	0.138855555555556	0.00132222222222222	0	0	0.164507495429616	0.00467102803738319	0
0.005	-1.5	2	0.01	0.1	10	0.5	6.76302022937613	0	0.000111111111111062	0.00780000000000003	0	0	0.000457765667574729	0.0161703839122487	0
0.01	-1.5	2	0.01	0.1	10	0.5	6.98935959448243	0	0.000155555555555575	0.0048111111111111	0	0	0.000578835110746587	0.011455748031496	0
0.05	-1.5	2	0.01	0.1	10	0.5	6.83544882621015	0	9.9999999999989e-05	0.00863333333333338	0	0	0.00042832861189797	0.0174746987951808	0
0.005	-0.5	2	0.01	0.1	10	0.5	6.24696647693378	0	0	0.1515	0	0	0	0.176296562339661	0
0.01	-0.5	2	0.01	0.1	10	0.5	6.43709154362307	0	0	0.102688888888889	0	0	0	0.124945493562232	0
0.05	-0.5	2	0.01	0.1	10	0.5	6.48235941664433	0	0	0.0883555555555555	0	0	0	0.109833050150726	0
0.005	1	2	0.01	0.1	10	0.5	5.57700195621914	0	0.0650888888888889	0.00139999999999996	0	0	0.0863031862028646	0.00485504587155948	0
0.01	1	2	0.01	0.1	10	0.5	5.91198421657646	0	0.0121	0.00436666666666663	0	0	0.0189130254996554	0.0106604951560817	0
0.05	1	2	0.01	0.1	10	0.5	5.58605553082339	0	1.11111111110729e-05	0.4685	0	0	8.78048780484784e-05	0.491583622484386	0
0.005	-1.5	10	0.01	0.1	10	0.5	5.67659127686591	0	0.114222222222222	0.00044444444444447	0	0	0.140944504896627	0.00260129032258079	0
0.01	-1.5	10	0.01	0.1	10	0.5	6.56384158808259	0	0.00934444444444449	0.000333333333333297	0	0	0.0151596566523606	0.00212061711079921	0
0.05	-1.5	10	0.01	0.1	10	0.5	6.38277009599756	0	0.0393777777777777	0.000122222222222246	0	0	0.0558179999999999	0.00116962025316478	0
0.005	-0.5	10	0.01	0.1	10	0.5	5.75807344830418	0	0.00160000000000005	0.0419333333333334	0	0	0.00364154540893136	0.0597955359949702	0
0.01	-0.5	10	0.01	0.1	10	0.5	5.65848412765741	0	0.002	0.0431888888888889	0	0	0.00433652007648184	0.061335253600501	0
0.05	-0.5	10	0.01	0.1	10	0.5	5.8486091943467	0	0.000355555555555553	0.0615888888888889	0	0	0.00105618860510805	0.0817580333625988	0
0.005	1	10	0.01	0.1	10	0.5	2.92430459717335	0.00823333333333333	0.740122222222222	0.0734444444444444	0.00802222222222226	0.00852268370607029	0.810720695484183	0.0938962795941375	0.0083079452054795
0.01	1	10	0.01	0.1	10	0.5	2.79755455271382	0.0128333333333333	0.808655555555556	0.0740444444444445	0.0124666666666666	0.0132029938761624	0.833082352941176	0.0945035453010692	0.012831586113002
0.05	1	10	0.01	0.1	10	0.5	3.4403583496157	0.0012	0.128622222222222	0.290611111111111	0.00115555555555558	0.00127029171528588	0.154673098330241	0.316042196116039	0.00122324387397902
0.005	-1.5	2	0	0.5	10	0.5	6.54573443887409	0	0.000111111111111062	0.0310444444444444	0	0	0.000457765667574729	0.0469861861861862	0
0.01	-1.5	2	0	0.5	10	0.5	6.65437733412511	0	3.33333333333297e-05	0.0371444444444444	0	0	0.000196108949416321	0.0542981630679987	0
0.05	-1.5	2	0	0.5	10	0.5	6.73585950556338	0	2.22222222222568e-05	0.0168777777777778	0	0	0.000147584187408721	0.0291204260174971	0
0.005	-0.5	2	0	0.5	10	0.5	5.99346638801473	0	0	0.374844444444444	0	0	0	0.399599153936545	0
0.01	-0.5	2	0	0.5	10	0.5	6.6000558864996	0	0	0.0449777777777778	0	0	0	0.0634347528753497	0
0.05	-0.5	2	0	0.5	10	0.5	6.36466294678905	0	1.11111111110729e-05	0.146677777777778	0	0	8.78048780484784e-05	0.171609595047717	0
0.005	1	2	0	0.5	10	0.5	5.53173408319788	0	0.0587666666666666	0.00224444444444449	0	0	0.078749069423929	0.00656825806451627	0
0.01	1	2	0	0.5	10	0.5	5.27823399427883	0	0.00666666666666671	0.0521666666666667	0	0	0.0116218293620293	0.071187725631769	0
0.05	1	2	0	0.5	10	0.5	5.8848234927637	0	6.66666666666593e-05	0.159022222222222	0	0	0.000318315789473649	0.184135544781832	0
0.005	-1.5	10	0	0.5	10	0.5	5.89387706736796	0	0.109377777777778	0.000111111111111062	0	0	0.136226688632619	0.00109090909090861	0
0.01	-1.5	10	0	0.5	10	0.5	6.56384158808259	0	0.00905555555555559	0.000311111111111151	0	0	0.0147861771058316	0.00202467718794861	0
0.05	-1.5	10	0	0.5	10	0.5	6.21980575312102	0	0.0273666666666667	0.000588888888888861	0	0	0.0401342386032977	0.00305979381443285	0
0.005	-0.5	10	0	0.5	10	0.5	5.8667163435552	0	0.00205555555555559	0.0270555555555556	0	0	0.0044378867206093	0.042043165467626	0
0.01	-0.5	10	0	0.5	10	0.5	5.45930548636387	0	0.00129999999999997	0.107288888888889	0	0	0.00302710472279253	0.130019342773177	0
0.05	-0.5	10	0	0.5	10	0.5	6.22885932772527	0	0.000955555555555598	0.0151666666666667	0	0	0.00229090909090919	0.026883939038687	0
0.005	1	10	0	0.5	10	0.5	3.1778046860924	0.00345555555555556	0.712011111111111	0.0424	0.0033333333333333	0.00361661282879557	0.790813516160627	0.0604040201005025	0.00348949919224552
0.01	1	10	0	0.5	10	0.5	3.14159038767539	0.00377777777777778	0.817788888888889	0.0276333333333333	0.00368888888888885	0.00394747753973739	0.836642271293375	0.042852923076923	0.00385370796867799
0.05	1	10	0	0.5	10	0.5	4.44530513068766	0	0.1186	0.0319888888888888	0	0	0.145122632856758	0.0480787276341948	0
0.005	-1.5	2	1e-05	0.5	10	0.5	6.83544882621015	0	0.000255555555555564	0.00475555555555551	0	0	0.00083817787418658	0.0113652265542675	0
0.01	-1.5	2	1e-05	0.5	10	0.5	6.46425226743582	0	1.11111111110729e-05	0.0959111111111111	0	0	8.78048780484784e-05	0.11783661971831	0
0.05	-1.5	2	1e-05	0.5	10	0.5	6.69964520714637	0	5.55555555555864e-05	0.0195777777777778	0	0	0.000276013143483176	0.0326608311879368	0
0.005	-0.5	2	1e-05	0.5	10	0.5	6.0930557086615	0	0	0.273422222222222	0	0	0	0.298925813449024	0
0.01	-0.5	2	1e-05	0.5	10	0.5	6.16548430549551	0	0	0.294255555555556	0	0	0	0.319545894182428	0
0.05	-0.5	2	1e-05	0.5	10	0.5	6.54573443887409	0	0	0.0659	0	0	0	0.08619446366782	0
0.005	1	2	1e-05	0.5	10	0.5	5.21485897204907	0	0.0448888888888889	0.0109666666666667	0	0	0.0626125461254612	0.0208748636172892	0
0.01	1	2	1e-05	0.5	10	0.5	5.82144847053394	0	0.00853333333333328	0.00796666666666668	0	0	0.0140907171459773	0.0164407643312102	0
0.05	1	2	1e-05	0.5	10	0.5	5.57700195621914	0	1.11111111110729e-05	0.368988888888889	0	0	8.78048780484784e-05	0.393810021171489	0
0.005	-1.5	10	1e-05	0.5	10	0.5	5.17864467363206	0	0.0776111111111111	0.00590000000000002	0	0	0.101629330254042	0.0132225296442688	0
0.01	-1.5	10	1e-05	0.5	10	0.5	6.14737715628701	0	0.00194444444444442	0.00992222222222228	0	0	0.0042465093885411	0.0193246887075999	0
0.05	-1.5	10	1e-05	0.5	10	0.5	6.39182367060181	0	0.0408777777777778	4.44444444444025e-05	0	0	0.0577098039215687	0.000669767441859834	0
0.005	-0.5	10	1e-05	0.5	10	0.5	5.94819851499347	0	0.00297777777777775	0.0149555555555556	0	0	0.00598193091231172	0.0265616288175412	0
0.01	-0.5	10	1e-05	0.5	10	0.5	5.61321625463615	0	0.00291111111111109	0.0403444444444444	0	0	0.00588449197860958	0.0579304843304843	0
0.05	-0.5	10	1e-05	0.5	10	0.5	6.21075217851677	0	0.000988888888888928	0.0155888888888889	0	0	0.00236332982086416	0.0274180690189996	0
0.005	1	10	1e-05	0.5	10	0.5	2.79755455271382	0.0123111111111111	0.744433333333333	0.0950666666666666	0.0120333333333333	0.0126772304199773	0.812499903753609	0.117062035278155	0.0123940054495913
0.01	1	10	1e-05	0.5	10	0.5	3.25928685753067	0.00242222222222222	0.744233333333333	0.0281888888888889	0.0023333333333333	0.00254628041714948	0.812477111913357	0.043521034717495	0.0024528389339513
0.05	1	10	1e-05	0.5	10	0.5	4.74407309262797	0	0.0881444444444445	0.0200888888888889	0	0	0.113715358361775	0.0333784615384616	0
0.005	-1.5	2	1e-04	0.5	10	0.5	6.69964520714637	0	0.000166666666666648	0.0126444444444445	0	0	0.000609186140209441	0.0232113314447592	0
0.01	-1.5	2	1e-04	0.5	10	0.5	6.95314529606542	0	9.9999999999989e-05	0.00606666666666666	0	0	0.00042832861189797	0.0134696035242291	0
0.05	-1.5	2	1e-04	0.5	10	0.5	6.48235941664433	0	5.55555555555864e-05	0.0629222222222222	0	0	0.000276013143483176	0.0832842719579807	0
0.005	-0.5	2	1e-04	0.5	10	0.5	6.12021643247425	0	0	0.2501	0	0	0	0.275620408163265	0
0.01	-0.5	2	1e-04	0.5	10	0.5	5.99346638801473	0	0	0.486466666666667	0	0	0	0.508905166051661	0
0.05	-0.5	2	1e-04	0.5	10	0.5	6.24696647693378	0	0	0.233866666666667	0	0	0	0.259877315041646	0
0.005	1	2	1e-04	0.5	10	0.5	5.46835906096812	0	0.0612555555555555	0.00271111111111111	0	0	0.0814824633431084	0.00752607099143206	0
0.01	1	2	1e-04	0.5	10	0.5	5.67659127686591	0	0.00683333333333336	0.0174	0	0	0.0118758620689656	0.0298285714285714	0
0.05	1	2	1e-04	0.5	10	0.5	6.12021643247425	0	0.000222222222222235	0.0734888888888889	0	0	0.000754491017964114	0.093926627218935	0
0.005	-1.5	10	1e-04	0.5	10	0.5	6.02062711182748	0	0.112055555555556	7.77777777777322e-05	0	0	0.138799563080284	0.000902301790280801	0
0.01	-1.5	10	1e-04	0.5	10	0.5	6.0930557086615	0	0.00473333333333337	0.0061444444444444	0	0	0.00882828947368427	0.0135560311284046	0
0.05	-1.5	10	1e-04	0.5	10	0.5	6.40087724520606	0	0.0405555555555556	0.000111111111111062	0	0	0.0573084112149533	0.00109090909090861	0
0.005	-0.5	10	1e-04	0.5	10	0.5	5.85766276895095	0	0.00186666666666668	0.0279666666666667	0	0	0.00411628585318429	0.0432663028649387	0
0.01	-0.5	10	1e-04	0.5	10	0.5	5.57700195621914	0	0.00149999999999995	0.0760777777777778	0	0	0.00343462897526489	0.0966635294117647	0
0.05	-0.5	10	1e-04	0.5	10	0.5	6.04778783564024	0	0.000511111111111129	0.0387333333333333	0	0	0.00136617560400712	0.0560965517241379	0
0.005	1	10	1e-04	0.5	10	0.5	3.09632251465413	0.00442222222222222	0.744911111111111	0.0444888888888889	0.0042888888888889	0.00461237065992182	0.812630303030303	0.0628861327516361	0.00447227586206897
0.01	1	10	1e-04	0.5	10	0.5	2.85187600033933	0.0109111111111111	0.824311111111111	0.0593888888888889	0.0106111111111111	0.0112458077709611	0.83967554457669	0.0793017368266118	0.0109415776312799
0.05	1	10	1e-04	0.5	10	0.5	4.67164449579396	0	0.121666666666667	0.0154666666666666	0	0	0.148195488721805	0.0272242142025611	0
0.005	-1.5	2	0.001	0.5	10	0.5	6.53668086426984	0	8.88888888889161e-05	0.0333444444444444	0	0	0.000392982456140471	0.0496554169402494	0
0.01	-1.5	2	0.001	0.5	10	0.5	6.97125244527393	0	9.9999999999989e-05	0.00504444444444441	0	0	0.00042832861189797	0.0117885625965996	0
0.05	-1.5	2	0.001	0.5	10	0.5	6.87166312462716	0	0.000133333333333319	0.00702222222222226	0	0	0.000519587628865922	0.0149403377110695	0
0.005	-0.5	2	0.001	0.5	10	0.5	6.07494855945299	0	0	0.289522222222222	0	0	0	0.315084644913628	0
0.01	-0.5	2	0.001	0.5	10	0.5	6.45519869283157	0	0	0.0923111111111111	0	0	0	0.114124611610793	0
0.05	-0.5	2	0.001	0.5	10	0.5	6.34655579758055	0	0	0.158033333333333	0	0	0	0.183100689655172	0
0.005	1	2	0.001	0.5	10	0.5	5.69469842607442	0	0.0716	0.000833333333333353	0	0	0.0942750653120464	0.00363811357074118	0
0.01	1	2	0.001	0.5	10	0.5	5.67659127686591	0	0.00882222222222218	0.0136222222222222	0	0	0.0144886314265025	0.0246569832402234	0
0.05	1	2	0.001	0.5	10	0.5	6.56384158808259	0	0.000744444444444436	0.00553333333333328	0	0	0.00184726477024068	0.0126126633165828	0
0.005	-1.5	10	0.001	0.5	10	0.5	5.87576991815945	0	0.103011111111111	0.000111111111111062	0	0	0.130228093645485	0.00109090909090861	0
0.01	-1.5	10	0.001	0.5	10	0.5	6.55478801347834	0	0.00906666666666667	0.000488888888888872	0	0	0.0147883495145631	0.00276508728179542	0
0.05	-1.5	10	0.001	0.5	10	0.5	6.39182367060181	0	0.0410111111111111	0.000133333333333319	0	0	0.0578440298507463	0.00122926829268279	0
0.005	-0.5	10	0.001	0.5	10	0.5	5.54078765780213	0	0.00273333333333337	0.0540333333333334	0	0	0.00560506329113931	0.0733598323855134	0
0.01	-0.5	10	0.001	0.5	10	0.5	5.54984123240639	0	0.00125555555555557	0.0794666666666667	0	0	0.00293718411552349	0.100295158597663	0
0.05	-0.5	10	0.001	0.5	10	0.5	5.8667163435552	0	0.000644444444444447	0.0478222222222222	0	0	0.0016367301231803	0.0664791909285933	0
0.005	1	10	0.001	0.5	10	0.5	3.39509047659444	0.00138888888888889	0.774888888888889	0.0165888888888889	0.00136666666666663	0.00146716348393107	0.827474649204864	0.0287505154639174	0.00144301675977649
0.01	1	10	0.001	0.5	10	0.5	3.38603690199019	0.00135555555555556	0.771655555555556	0.0168444444444444	0.00131111111111115	0.00143295269168026	0.826087128712871	0.0290961157654227	0.00138629370629375
0.05	1	10	0.001	0.5	10	0.5	4.76218024183647	0	0.0903222222222222	0.0178111111111111	0	0	0.115997055492639	0.0303726315789474	0
0.005	-1.5	2	0.01	0.5	10	0.5	6.43709154362307	0	3.33333333333297e-05	0.0570777777777778	0	0	0.000196108949416321	0.0768035597745476	0
0.01	-1.5	2	0.01	0.5	10	0.5	7.00746674369093	0	0.000211111111111162	0.00408888888888892	0	0	0.000728767123287846	0.0101851729818782	0
0.05	-1.5	2	0.01	0.5	10	0.5	6.78112737858464	0	5.55555555555864e-05	0.0122222222222222	0	0	0.000276013143483176	0.0226841243862521	0
0.005	-0.5	2	0.01	0.5	10	0.5	6.20169860391252	0	0	0.182644444444444	0	0	0	0.208736507936508	0
0.01	-0.5	2	0.01	0.5	10	0.5	6.13832358168276	0	0	0.321677777777778	0	0	0	0.346422222222222	0
0.05	-0.5	2	0.01	0.5	10	0.5	6.65437733412511	0	1.11111111110729e-05	0.0362666666666667	0	0	8.78048780484784e-05	0.0532552929750728	0
0.005	1	2	0.01	0.5	10	0.5	5.71280557528292	0	0.0713777777777778	0.000966666666666671	0	0	0.0940370607028754	0.00391500000000002	0
0.01	1	2	0.01	0.5	10	0.5	5.6222698292404	0	0.0132777777777778	0.0102666666666666	0	0	0.0205066394279878	0.0198675767918088	0
0.05	1	2	0.01	0.5	10	0.5	6.16548430549551	0	0.000122222222222246	0.0633222222222222	0	0	0.000488028169014179	0.0836185152838427	0
0.005	-1.5	10	0.01	0.5	10	0.5	5.79428774672119	0	0.111222222222222	0.000155555555555575	0	0	0.137955701394586	0.00133889943074021	0
0.01	-1.5	10	0.01	0.5	10	0.5	6.06589498484874	0	0.0042888888888889	0.00652222222222221	0	0	0.00814673366834173	0.0141961612284069	0
0.05	-1.5	10	0.01	0.5	10	0.5	6.1292700070785	0	0.0218	0.00108888888888892	0	0	0.0324425196850394	0.00415757575757587	0
0.005	-0.5	10	0.01	0.5	10	0.5	6.05684141024449	0	0.00278888888888884	0.0114666666666666	0	0	0.00568812949640278	0.0215910336239103	0
0.01	-0.5	10	0.01	0.5	10	0.5	5.65848412765741	0	0.000988888888888928	0.0657888888888889	0	0	0.00236332982086416	0.0860739544274589	0
0.05	-0.5	10	0.01	0.5	10	0.5	5.80334132132544	0	0.000177777777777832	0.119488888888889	0	0	0.000638479809976443	0.142970614613558	0
0.005	1	10	0.01	0.5	10	0.5	2.78850097810957	0.0126666666666667	0.832211111111111	0.0671222222222222	0.0122888888888889	0.0130344827586207	0.845237779767234	0.0873898966704937	0.0126514752610077
0.01	1	10	0.01	0.5	10	0.5	2.2000186288332	0.0695	0.863944444444444	0.211055555555556	0.0678	0.0701027351567712	0.868347440726789	0.237673286991063	0.068433644859813
0.05	1	10	0.01	0.5	10	0.5	3.27739400673917	0.00236666666666667	0.0833333333333334	0.485688888888889	0.00223333333333331	0.0024884561891516	0.108589485779948	0.508208719723183	0.00234935064935062
0.005	-1.5	2	0.1	0.5	10	0.5	6.13832358168276	0	3.33333333333297e-05	0.2114	0	0	0.000196108949416321	0.238002084884587	0
0.01	-1.5	2	0.1	0.5	10	0.5	6.06589498484874	0	0	0.415166666666667	0	0	0	0.439690870884894	0
0.05	-1.5	2	0.1	0.5	10	0.5	6.47330584204007	0	1.11111111110729e-05	0.0655666666666667	0	0	8.78048780484784e-05	0.0858327272727273	0
0.005	-0.5	2	0.1	0.5	10	0.5	5.99346638801473	0	0	0.372233333333333	0	0	0	0.397002210204561	0
0.01	-0.5	2	0.1	0.5	10	0.5	5.6041626800319	0	0	0.915066666666667	0	0	0	0.921772684876749	0
0.05	-0.5	2	0.1	0.5	10	0.5	6.47330584204007	0	1.11111111110729e-05	0.0925	0	0	8.78048780484784e-05	0.114326975476839	0
0.005	1	2	0.1	0.5	10	0.5	4.78028739104498	0	0.0309888888888888	0.0559777777777778	0	0	0.0450097982708933	0.0755400356930398	0
0.01	1	2	0.1	0.5	10	0.5	4.80744811485773	0	0.00292222222222227	0.242677777777778	0	0	0.00589906542056084	0.26841901975128	0
0.05	1	2	0.1	0.5	10	0.5	4.65353734658545	0	0	0.975244444444444	0	0	0	0.978480159256802	0
0.005	-1.5	10	0.1	0.5	10	0.5	5.48646621017662	0	0.0791777777777778	0.00162222222222219	0	0	0.103471737251513	0.00531292418772553	0
0.01	-1.5	10	0.1	0.5	10	0.5	5.29634114348733	0	0.00229999999999997	0.108588888888889	0	0	0.00486604477611934	0.131279104477612	0
0.05	-1.5	10	0.1	0.5	10	0.5	5.63132340384465	0	0.0270777777777778	0.00444444444444447	0	0	0.0397491262135922	0.0107922912205568	0
0.005	-0.5	10	0.1	0.5	10	0.5	5.56794838161489	0	0.00178888888888884	0.0643222222222222	0	0	0.00397764705882342	0.0846679048171793	0
0.01	-0.5	10	0.1	0.5	10	0.5	5.04284105456828	0	0.000399999999999956	0.361955555555556	0	0	0.00115788130185054	0.386768056537103	0
0.05	-0.5	10	0.1	0.5	10	0.5	5.14243037521505	0	0.000133333333333319	0.4661	0	0	0.000519587628865922	0.489178528459047	0
0.005	1	10	0.1	0.5	10	0.5	1.15885754934424	0.485577777777778	0.801766666666667	0.859077777777778	0.479422222222222	0.485684851157663	0.832169199178645	0.867879020044543	0.479527938257993
0.01	1	10	0.1	0.5	10	0.5	2.86092957494359	0.0108555555555556	0.719122222222222	0.0929333333333333	0.0104333333333333	0.0111936349170266	0.796177300463754	0.1148	0.0107656050955414
0.05	1	10	0.1	0.5	10	0.5	2.69796523206705	0.0175555555555556	0.0901555555555555	0.812566666666667	0.017	0.0179918662449164	0.1158158028887	0.823827089852481	0.0174303797468355
0.005	-1.5	2	0	1e-05	2	0.5	6.52762728966559	0	7.77777777777322e-05	0.0346777777777778	0	0	0.000355287009063236	0.05120390625	0
0.01	-1.5	2	0	1e-05	2	0.5	6.87166312462716	0	2.22222222222568e-05	0.00955555555555554	0	0	0.000147584187408721	0.0188616187989556	0
0.05	-1.5	2	0	1e-05	2	0.5	6.69964520714637	0	3.33333333333297e-05	0.0199888888888888	0	0	0.000196108949416321	0.0332610418195157	0
0.005	-0.5	2	0	1e-05	2	0.5	5.89387706736796	0	0	0.488044444444444	0	0	0	0.510437998616555	0
0.01	-0.5	2	0	1e-05	2	0.5	5.8848234927637	0	0	0.625333333333333	0	0	0	0.643637848876787	0
0.05	-0.5	2	0	1e-05	2	0.5	6.30128792455929	0	0	0.190044444444444	0	0	0	0.21615887662989	0
0.005	1	2	0	1e-05	2	0.5	4.6444837719812	0	0.0333222222222223	0.0738555555555556	0	0	0.0480144853875477	0.0943297297297297	0
0.01	1	2	0	1e-05	2	0.5	4.80744811485773	0	0.00582222222222217	0.173911111111111	0	0	0.0104468354430379	0.199661047835991	0
0.05	1	2	0	1e-05	2	0.5	5.45025191175962	0	0	0.606322222222222	0	0	0	0.625631847133758	0
0.005	-1.5	10	0	1e-05	2	0.5	6.08400213405725	0	0.129511111111111	0	0	0	0.155331147540984	0	0
0.01	-1.5	10	0	1e-05	2	0.5	6.39182367060181	0	0.00504444444444441	0.00187777777777776	0	0	0.00926755771567429	0.00587420689655166	0
0.05	-1.5	10	0	1e-05	2	0.5	6.10210928326575	0	0.0204444444444445	0.0010444444444444	0	0	0.0304852071005918	0.00407010309278335	0
0.005	-0.5	10	0	1e-05	2	0.5	5.92103779118071	0	0.00238888888888888	0.0212555555555556	0	0	0.00502830626450115	0.0348951140065147	0
0.01	-0.5	10	0	1e-05	2	0.5	5.55889480701064	0	0.00211111111111106	0.0580666666666667	0	0	0.00454054054054044	0.0779031055900622	0
0.05	-0.5	10	0	1e-05	2	0.5	6.04778783564024	0	0.000499999999999945	0.0369444444444444	0	0	0.00134519572953722	0.0540406320541761	0
0.005	1	10	0	1e-05	2	0.5	1.6930184509951	0.210066666666667	0.825811111111111	0.513188888888889	0.206577777777778	0.210484294234592	0.840825858585858	0.5347633356306	0.206988469184891
0.01	1	10	0	1e-05	2	0.5	2.37203654631399	0.0447	0.795666666666667	0.194677777777778	0.0435444444444445	0.0452991957104558	0.831837353549276	0.221207014028056	0.0441577464788733
0.05	1	10	0	1e-05	2	0.5	4.4000372576664	0	0.103011111111111	0.0469000000000001	0	0	0.130228093645485	0.0655790382244144	0
0.005	-1.5	2	0	1e-04	2	0.5	6.74491308016763	0	0.000177777777777832	0.00905555555555559	0	0	0.000638479809976443	0.0180951541850221	0
0.01	-1.5	2	0	1e-04	2	0.5	6.98935959448243	0	0.000177777777777832	0.00412222222222225	0	0	0.000638479809976443	0.0102177049180329	0
0.05	-1.5	2	0	1e-04	2	0.5	6.60910946110385	0	5.55555555555864e-05	0.0344333333333333	0	0	0.000276013143483176	0.0509590864600326	0
0.005	-0.5	2	0	1e-04	2	0.5	5.8667163435552	0	0	0.525977777777778	0	0	0	0.546583092783505	0
0.01	-0.5	2	0	1e-04	2	0.5	5.67659127686591	0	0	0.862788888888889	0	0	0	0.871240071237756	0
0.05	-0.5	2	0	1e-04	2	0.5	6.42803796901882	0	0	0.111477777777778	0	0	0	0.134520670391061	0
0.005	1	2	0	1e-04	2	0.5	5.30539471809159	0	0.0527888888888889	0.00568888888888885	0	0	0.0719718665464382	0.0128830753869195	0
0.01	1	2	0	1e-04	2	0.5	4.86176956248324	1.11111111111111e-05	0.00293333333333334	0.222733333333333	1.11111111110729e-05	1.23287671232877e-05	0.0059162294353046	0.248846896551724	1.23257520175658e-05
0.05	1	2	0	1e-04	2	0.5	4.87987671169175	0	0	0.970722222222222	0	0	0	0.974373976543483	0
0.005	-1.5	10	0	1e-04	2	0.5	5.95725208959772	0	0.103077777777778	5.55555555555864e-05	0	0	0.130276065756478	0.000759036144578735	0
0.01	-1.5	10	0	1e-04	2	0.5	5.93009136578496	0	0.00214444444444439	0.0191777777777777	0	0	0.0045969754253307	0.0321710059171597	0
0.05	-1.5	10	0	1e-04	2	0.5	6.46425226743582	0	0.0487777777777778	4.44444444444025e-05	0	0	0.0672919708029198	0.000669767441859834	0
0.005	-0.5	10	0	1e-04	2	0.5	5.91198421657646	0	0.00266666666666671	0.0207555555555555	0	0	0.00550318471337588	0.034272733891518	0
0.01	-0.5	10	0	1e-04	2	0.5	5.54078765780213	0	0.00149999999999995	0.0796888888888889	0	0	0.00343462897526489	0.100463813229572	0
0.05	-0.5	10	0	1e-04	2	0.5	5.93009136578496	0	0.000299999999999967	0.0652777777777778	0	0	0.00094961618981148	0.085528596187175	0
0.005	1	10	0	1e-04	2	0.5	2.60742948602453	0.0238222222222222	0.759611111111111	0.136433333333333	0.0231777777777777	0.0243482649842271	0.82117840665874	0.16103606557377	0.0237002705139765
0.01	1	10	0	1e-04	2	0.5	1.4847862350973	0.302766666666667	0.874266666666667	0.585933333333333	0.298155555555556	0.303234621329212	0.876973374613003	0.605282076975632	0.298616383307573
0.05	1	10	0	1e-04	2	0.5	2.89714387336059	0.00917777777777778	0.179488888888889	0.503888888888889	0.00884444444444443	0.00947868852459016	0.204204063205418	0.525676172953082	0.00914066985645932
0.005	-1.5	2	1e-05	1e-04	2	0.5	6.48235941664433	0	4.44444444444025e-05	0.0446666666666666	0	0	0.00023773584905638	0.0630784557907845	0
0.01	-1.5	2	1e-05	1e-04	2	0.5	7.07989534052495	0	0.000199999999999978	0.00186666666666668	0	0	0.000698921417565408	0.00584751381215475	0
0.05	-1.5	2	1e-05	1e-04	2	0.5	6.68153805793787	0	3.33333333333297e-05	0.0230111111111111	0	0	0.000196108949416321	0.0370925373134328	0
0.005	-0.5	2	1e-05	1e-04	2	0.5	5.91198421657646	0	1.11111111110729e-05	0.404944444444444	0	0	8.78048780484784e-05	0.429667368421053	0
0.01	-0.5	2	1e-05	1e-04	2	0.5	5.54984123240639	0	0	0.962677777777778	0	0	0	0.966727119769759	0
0.05	-0.5	2	1e-05	1e-04	2	0.5	6.24696647693378	0	0	0.232455555555556	0	0	0	0.258626048565121	0
0.005	1	2	1e-05	1e-04	2	0.5	4.53584087673018	0	0.0295444444444445	0.108933333333333	0	0	0.043091189710611	0.131625359616409	0
0.01	1	2	1e-05	1e-04	2	0.5	5.02473390535978	0	0.00482222222222217	0.120722222222222	0	0	0.00896459016393433	0.144294071146245	0
0.05	1	2	1e-05	1e-04	2	0.5	5.20580539744482	0	1.11111111110729e-05	0.725044444444444	0	0	8.78048780484784e-05	0.739721457489878	0
0.005	-1.5	10	1e-05	1e-04	2	0.5	6.1292700070785	0	0.142555555555556	1.11111111110729e-05	0	0	0.168087340785027	0.000359999999998761	0
0.01	-1.5	10	1e-05	1e-04	2	0.5	6.49141299124858	0	0.00704444444444441	0.000811111111111096	0	0	0.0121542791936097	0.00358247322297948	0
0.05	-1.5	10	1e-05	1e-04	2	0.5	6.05684141024449	0	0.0248666666666667	0.0010444444444444	0	0	0.0367890410958905	0.00407010309278335	0
0.005	-0.5	10	1e-05	1e-04	2	0.5	5.93009136578496	0	0.00253333333333339	0.0182222222222223	0	0	0.00526877579092171	0.030945713216024	0
0.01	-0.5	10	1e-05	1e-04	2	0.5	5.47741263557237	0	0.00112222222222225	0.103922222222222	0	0	0.00265263157894743	0.126378337801609	0
0.05	-0.5	10	1e-05	1e-04	2	0.5	6.12021643247425	0	0.000566666666666715	0.0259	0	0	0.00148149855907794	0.0406513494809689	0
0.005	1	10	1e-05	1e-04	2	0.5	2.39014369552249	0.0426222222222222	0.849888888888889	0.152477777777778	0.0414333333333333	0.0432322003577818	0.858751401869159	0.177207071483474	0.0420545088386664
0.01	1	10	1e-05	1e-04	2	0.5	2.49878659077351	0.0319444444444444	0.776022222222222	0.161655555555556	0.031	0.0325106573928652	0.827474649204864	0.186677596741344	0.0315707229456668
0.05	1	10	1e-05	1e-04	2	0.5	4.05600142270483	4.44444444444444e-05	0.105944444444444	0.105944444444444	4.44444444444025e-05	4.84965119076257e-05	0.132890461708598	0.128561797752809	4.84615384614928e-05
0.005	-1.5	2	0	0.001	2	0.5	6.47330584204007	0	5.55555555555864e-05	0.0439333333333334	0	0	0.000276013143483176	0.0622329066500156	0
0.01	-1.5	2	0	0.001	2	0.5	6.71775235635487	0	4.44444444444025e-05	0.0247555555555555	0	0	0.00023773584905638	0.0392215158924205	0
0.05	-1.5	2	0	0.001	2	0.5	6.46425226743582	0	1.11111111110729e-05	0.0650333333333334	0	0	8.78048780484784e-05	0.0853214574898786	0
0.005	-0.5	2	0	0.001	2	0.5	5.82144847053394	0	0	0.583188888888889	0	0	0	0.602721531100478	0
0.01	-0.5	2	0	0.001	2	0.5	5.46835906096812	0	0	0.994422222222222	0	0	0	0.995959196290572	0
0.05	-0.5	2	0	0.001	2	0.5	6.28318077535079	0	0	0.203844444444444	0	0	0	0.230583142144638	0
0.005	1	2	0	0.001	2	0.5	4.35476938464514	0	0.0200333333333333	0.203022222222222	0	0	0.0298820124958895	0.229882376435347	0
0.01	1	2	0	0.001	2	0.5	4.87987671169175	0	0.00492222222222227	0.159933333333333	0	0	0.00910570962479618	0.184924190670405	0
0.05	1	2	0	0.001	2	0.5	5.77618059751268	0	2.22222222222568e-05	0.280822222222222	0	0	0.000147584187408721	0.306351515151515	0
0.005	-1.5	10	0	0.001	2	0.5	5.74901987369993	0	0.113466666666667	0.000288888888888894	0	0	0.140241089918256	0.00192705882352945	0
0.01	-1.5	10	0	0.001	2	0.5	6.49141299124858	0	0.00784444444444443	0.000811111111111096	0	0	0.0132522905027933	0.00358247322297948	0
0.05	-1.5	10	0	0.001	2	0.5	6.31034149916354	0	0.0356666666666666	0.000177777777777832	0	0	0.0511165876777251	0.0014348754448403	0
0.005	-0.5	10	0	0.001	2	0.5	5.93914494038922	0	0.00372222222222218	0.0127333333333334	0	0	0.00720307167235487	0.0233556004852407	0
0.01	-0.5	10	0	0.001	2	0.5	5.73996629909567	0	0.00185555555555561	0.0362555555555556	0	0	0.00409776046738084	0.0532552929750728	0
0.05	-0.5	10	0	0.001	2	0.5	6.13832358168276	0	0.000844444444444425	0.0204111111111112	0	0	0.00206157158234656	0.0337654266958425	0
0.005	1	10	0	0.001	2	0.5	2.08232215897793	0.0932888888888889	0.8027	0.317766666666667	0.0911777777777778	0.093805896696963	0.832169199178645	0.342454169636493	0.09172375249501
0.01	1	10	0	0.001	2	0.5	2.89714387336059	0.00897777777777778	0.8318	0.0505222222222222	0.00867777777777778	0.00927846889952153	0.845216129032258	0.0694030284675954	0.00897250968771371
0.05	1	10	0	0.001	2	0.5	3.67575128932625	0.000333333333333333	0.109533333333333	0.2153	0.000322222222222224	0.000357362325691326	0.13627076247943	0.241673051224944	0.000345287030474842
0.005	-1.5	2	1e-05	0.001	2	0.5	6.55478801347834	0	3.33333333333297e-05	0.0296222222222222	0	0	0.000196108949416321	0.0452869565217391	0
0.01	-1.5	2	1e-05	0.001	2	0.5	6.78112737858464	0	4.44444444444025e-05	0.0172111111111111	0	0	0.00023773584905638	0.0295718181818181	0
0.05	-1.5	2	1e-05	0.001	2	0.5	6.73585950556338	0	6.66666666666593e-05	0.0163777777777778	0	0	0.000318315789473649	0.0284416539050537	0
0.005	-0.5	2	1e-05	0.001	2	0.5	6.45519869283157	0	3.33333333333297e-05	0.0587777777777778	0	0	0.000196108949416321	0.0786858660371791	0
0.01	-0.5	2	1e-05	0.001	2	0.5	5.73996629909567	0	0	0.797022222222222	0	0	0	0.808609438604339	0
0.05	-0.5	2	1e-05	0.001	2	0.5	6.02062711182748	0	0	0.468711111111111	0	0	0	0.491691396854764	0
0.005	1	2	1e-05	0.001	2	0.5	4.96135888313002	0	0.0356111111111111	0.0304	0	0	0.0510530973451328	0.0462577658503857	0
0.01	1	2	1e-05	0.001	2	0.5	4.21896576558136	2.22222222222222e-05	0.00131111111111115	0.687322222222222	2.22222222222568e-05	2.44541484716157e-05	0.00305141097998983	0.703609478672986	2.44541484716538e-05
0.05	1	2	1e-05	0.001	2	0.5	5.26012684507033	0	0	0.606633333333333	0	0	0	0.625810507163975	0
0.005	-1.5	10	1e-05	0.001	2	0.5	6.04778783564024	0	0.119488888888889	9.9999999999989e-05	0	0	0.146013362068966	0.00101704035874428	0
0.01	-1.5	10	1e-05	0.001	2	0.5	6.08400213405725	0	0.00360000000000005	0.00790000000000002	0	0	0.00699340471092086	0.0163254669703873	0
0.05	-1.5	10	1e-05	0.001	2	0.5	6.21075217851677	0	0.0255666666666666	0.000499999999999945	0	0	0.0377384965831435	0.00280346106304048	0
0.005	-0.5	10	1e-05	0.001	2	0.5	6.10210928326575	0	0.00355555555555553	0.00777777777777777	0	0	0.00692486045513092	0.0161390667886551	0
0.01	-0.5	10	1e-05	0.001	2	0.5	5.35066259111284	0	0.000800000000000023	0.162444444444444	0	0	0.00196363636363642	0.187540850089081	0
0.05	-0.5	10	1e-05	0.001	2	0.5	6.02062711182748	0	0.000600000000000045	0.0376222222222222	0	0	0.0015472427515635	0.0547671373555841	0
0.005	1	10	1e-05	0.001	2	0.5	2.89714387336059	0.00888888888888889	0.786011111111111	0.0613666666666667	0.00866666666666671	0.00918869644484959	0.828489466357308	0.0815346221441125	0.00896306429548568
0.01	1	10	1e-05	0.001	2	0.5	2.07326858437367	0.0946222222222222	0.796155555555556	0.325411111111111	0.0927111111111111	0.0951255319148936	0.831837353549276	0.350027223144415	0.0932455875831485
0.05	1	10	1e-05	0.001	2	0.5	3.72101916234751	0.000311111111111111	0.0647111111111112	0.296466666666667	0.000288888888888894	0.000333774834437086	0.0858524714828898	0.321639033723989	0.000309933774834443
0.005	-1.5	2	1e-04	0.001	2	0.5	6.54573443887409	0	4.44444444444025e-05	0.0307555555555555	0	0	0.00023773584905638	0.0466579264214047	0
0.01	-1.5	2	1e-04	0.001	2	0.5	6.78112737858464	0	0	0.0166333333333334	0	0	0	0.02877528604119	0
0.05	-1.5	2	1e-04	0.001	2	0.5	6.67248448333362	0	2.22222222222568e-05	0.0236333333333333	0	0	0.000147584187408721	0.0378533898305084	0
0.005	-0.5	2	1e-04	0.001	2	0.5	5.93914494038922	0	0	0.4374	0	0	0	0.461620846905538	0
0.01	-0.5	2	1e-04	0.001	2	0.5	5.6222698292404	0	0	0.900644444444444	0	0	0	0.9078496	0
0.05	-0.5	2	1e-04	0.001	2	0.5	6.19264502930827	0	0	0.283266666666667	0	0	0	0.308795385724585	0
0.005	1	2	1e-04	0.001	2	0.5	4.26423363860262	2.22222222222222e-05	0.0400777777777778	0.156311111111111	2.22222222222568e-05	2.44541484716157e-05	0.0566862488306829	0.181336879795396	2.44541484716538e-05
0.01	1	2	1e-04	0.001	2	0.5	4.73501951802372	0	0.00545555555555555	0.205555555555556	0	0	0.00989460215913633	0.232171314741036	0
0.05	1	2	1e-04	0.001	2	0.5	5.08810892758954	0	1.11111111110729e-05	0.893022222222222	0	0	8.78048780484784e-05	0.90036648144032	0
0.005	-1.5	10	1e-04	0.001	2	0.5	5.99346638801473	0	0.105655555555556	7.77777777777322e-05	0	0	0.132757229916897	0.000902301790280801	0
0.01	-1.5	10	1e-04	0.001	2	0.5	6.3737165213933	0	0.00592222222222227	0.00164444444444445	0	0	0.0105885691761924	0.00537019438444926	0
0.05	-1.5	10	1e-04	0.001	2	0.5	6.39182367060181	0	0.0403888888888889	6.66666666666593e-05	0	0	0.0570906824555937	0.000833057851239578	0
0.005	-0.5	10	1e-04	0.001	2	0.5	5.71280557528292	0	0.00177777777777777	0.0426888888888889	0	0	0.00396070726915518	0.0607202257761054	0
0.01	-0.5	10	1e-04	0.001	2	0.5	5.70375200067867	0	0.00167777777777778	0.0493555555555556	0	0	0.00378815331010453	0.0682135283363803	0
0.05	-0.5	10	1e-04	0.001	2	0.5	5.83955561974244	0	0.000311111111111151	0.0875333333333334	0	0	0.000973913043478385	0.108960263446762	0
0.005	1	10	1e-04	0.001	2	0.5	1.99178641293541	0.113088888888889	0.751777777777778	0.416433333333333	0.110455555555556	0.113665233769111	0.816277386934673	0.440826511085181	0.111067701174906
0.01	1	10	1e-04	0.001	2	0.5	1.43951836207604	0.325177777777778	0.876588888888889	0.610322222222222	0.320944444444444	0.3255366144339	0.878914058355438	0.629312727272727	0.32129860957846
0.05	1	10	1e-04	0.001	2	0.5	3.12348323846689	0.00401111111111111	0.128866666666667	0.4604	0.00391111111111109	0.00418936219203316	0.154844821192053	0.484092350486787	0.00408397790055246
0.005	-1.5	2	0	0.01	2	0.5	6.36466294678905	0	1.11111111110729e-05	0.0670777777777778	0	0	8.78048780484784e-05	0.0873571059431525	0
0.01	-1.5	2	0	0.01	2	0.5	6.96219887066967	0	0.000166666666666648	0.00503333333333333	0	0	0.000609186140209441	0.0117808049535604	0
0.05	-1.5	2	0	0.01	2	0.5	6.6000558864996	0	2.22222222222568e-05	0.0331777777777778	0	0	0.000147584187408721	0.0494721893491124	0
0.005	-0.5	2	0	0.01	2	0.5	5.82144847053394	0	1.11111111110729e-05	0.583155555555556	0	0	8.78048780484784e-05	0.602721531100478	0
0.01	-0.5	2	0	0.01	2	0.5	5.95725208959772	0	0	0.531577777777778	0	0	0	0.551896726939803	0
0.05	-0.5	2	0	0.01	2	0.5	6.15643073089126	0	0	0.276477777777778	0	0	0	0.301975246809535	0
0.005	1	2	0	0.01	2	0.5	4.16464431795585	3.33333333333333e-05	0.0455222222222222	0.164544444444444	3.33333333333297e-05	3.64864864864865e-05	0.0633790055248619	0.189579273558547	3.64776839565702e-05
0.01	1	2	0	0.01	2	0.5	3.84776920680704	0.000222222222222222	0.00472222222222218	0.742533333333333	0.000222222222222235	0.000238975817923186	0.00881481481481474	0.755864272890485	0.00023886255924172
0.05	1	2	0	0.01	2	0.5	5.53173408319788	0	1.11111111110729e-05	0.438122222222222	0	0	8.78048780484784e-05	0.462060544059521	0
0.005	-1.5	10	0	0.01	2	0.5	5.8486091943467	0	0.0969777777777778	0.000266666666666637	0	0	0.123599662826637	0.00184390243902419	0
0.01	-1.5	10	0	0.01	2	0.5	6.34655579758055	0	0.00461111111111112	0.00229999999999997	0	0	0.00864654816039688	0.00666632587859416	0
0.05	-1.5	10	0	0.01	2	0.5	6.3737165213933	0	0.0377222222222222	9.9999999999989e-05	0	0	0.0537230769230769	0.00101704035874428	0
0.005	-0.5	10	0	0.01	2	0.5	5.68564485147016	0	0.00106666666666666	0.0667	0	0	0.00253186813186812	0.0869899942495687	0
0.01	-0.5	10	0	0.01	2	0.5	5.73091272449142	0	0.00288888888888894	0.0309111111111111	0	0	0.00585784532856515	0.0468625668449198	0
0.05	-0.5	10	0	0.01	2	0.5	5.8486091943467	0	0.000233333333333308	0.0855777777777778	0	0	0.000783999999999914	0.107025310173697	0
0.005	1	10	0	0.01	2	0.5	3.25023328292642	0.00251111111111111	0.741	0.0304666666666666	0.00244444444444447	0.00263849895760945	0.810811671087533	0.046328126047603	0.00256845031271719
0.01	1	10	0	0.01	2	0.5	2.23623292725021	0.0639444444444444	0.903911111111111	0.163777777777778	0.0625888888888889	0.0645851703406814	0.905108344370861	0.188839857651246	0.0632582887700535
0.05	1	10	0	0.01	2	0.5	3.10537608925839	0.00464444444444444	0.105411111111111	0.533122222222222	0.0044777777777778	0.00484080882352941	0.132630108123094	0.553373546910755	0.00466602343211581
0.005	-1.5	2	1e-05	0.01	2	0.5	6.24696647693378	0	1.11111111110729e-05	0.1365	0	0	8.78048780484784e-05	0.161072840790843	0
0.01	-1.5	2	1e-05	0.01	2	0.5	6.85355597541865	0	4.44444444444025e-05	0.0110555555555556	0	0	0.00023773584905638	0.0210176026823136	0
0.05	-1.5	2	1e-05	0.01	2	0.5	6.8626095500229	0	0.000144444444444392	0.00705555555555559	0	0	0.00054966442953	0.0150042194092828	0
0.005	-0.5	2	1e-05	0.01	2	0.5	5.91198421657646	0	0	0.472144444444444	0	0	0	0.494835304990758	0
0.01	-0.5	2	1e-05	0.01	2	0.5	5.42309118794686	0	0	0.999955555555556	0	0	0	0.999955555555556	0
0.05	-0.5	2	1e-05	0.01	2	0.5	6.44614511822732	0	0	0.104366666666667	0	0	0	0.126884803001876	0
0.005	1	2	1e-05	0.01	2	0.5	4.79839454025348	1.11111111111111e-05	0.0324444444444445	0.0500555555555555	1.11111111110729e-05	1.23287671232877e-05	0.0468837209302326	0.0689498937139386	1.23257520175658e-05
0.01	1	2	1e-05	0.01	2	0.5	4.53584087673018	2.22222222222222e-05	0.00370000000000004	0.337444444444444	2.22222222222568e-05	2.44541484716157e-05	0.00716618274978658	0.361940884369827	2.44541484716538e-05
0.05	1	2	1e-05	0.01	2	0.5	4.68069807039821	0	0	0.9937	0	0	0	0.995675546719682	0
0.005	-1.5	10	1e-05	0.01	2	0.5	5.27823399427883	0	0.116233333333333	0.00196666666666667	0	0	0.142881951219512	0.00606032608695654	0
0.01	-1.5	10	1e-05	0.01	2	0.5	6.3737165213933	0	0.0049555555555556	0.00225555555555557	0	0	0.00915990220048908	0.00659651837524181	0
0.05	-1.5	10	1e-05	0.01	2	0.5	6.45519869283157	0	0.0474333333333333	2.22222222222568e-05	0	0	0.0657371219065078	0.000473239436620454	0
0.005	-0.5	10	1e-05	0.01	2	0.5	5.87576991815945	0	0.00272222222222218	0.0222666666666667	0	0	0.005587330316742	0.0361624060150376	0
0.01	-0.5	10	1e-05	0.01	2	0.5	5.59510910542765	0	0.00125555555555557	0.0682111111111111	0	0	0.00293718411552349	0.0884268648185196	0
0.05	-0.5	10	1e-05	0.01	2	0.5	6.16548430549551	0	0.000933333333333342	0.0176333333333333	0	0	0.00224475079533406	0.0301261016949152	0
0.005	1	10	1e-05	0.01	2	0.5	2.444465143148	0.0371888888888889	0.850777777777778	0.1368	0.0361222222222222	0.0377717868338558	0.858751401869159	0.161342901716069	0.0367212909009412
0.01	1	10	1e-05	0.01	2	0.5	2.29960794947997	0.0540777777777778	0.789155555555556	0.229833333333333	0.0528333333333333	0.0547171090787419	0.829381278962002	0.255896907216495	0.05349375
0.05	1	10	1e-05	0.01	2	0.5	4.31855508622813	0	0.0888	0.0630666666666667	0	0	0.114301021566402	0.0833538461538462	0
0.005	-1.5	2	1e-04	0.01	2	0.5	6.52762728966559	0	3.33333333333297e-05	0.0347666666666666	0	0	0.000196108949416321	0.0513184510250569	0
0.01	-1.5	2	1e-04	0.01	2	0.5	6.73585950556338	0	2.22222222222568e-05	0.0230777777777778	0	0	0.000147584187408721	0.0371867850799289	0
0.05	-1.5	2	1e-04	0.01	2	0.5	6.76302022937613	0	0.000111111111111062	0.0132	0	0	0.000457765667574729	0.0240946478873239	0
0.005	-0.5	2	1e-04	0.01	2	0.5	6.54573443887409	0	3.33333333333297e-05	0.0356888888888889	0	0	0.000196108949416321	0.0525088550113526	0
0.01	-0.5	2	1e-04	0.01	2	0.5	6.22885932772527	0	0	0.237311111111111	0	0	0	0.262996139750794	0
0.05	-0.5	2	1e-04	0.01	2	0.5	6.17453788009976	0	0	0.299011111111111	0	0	0	0.324089462365591	0
0.005	1	2	1e-04	0.01	2	0.5	4.30044793701963	2.22222222222222e-05	0.0161555555555556	0.244655555555556	2.22222222222568e-05	2.44541484716157e-05	0.0243703358829399	0.270474677065562	2.44541484716538e-05
0.01	1	2	1e-04	0.01	2	0.5	4.39098368306215	1.11111111111111e-05	0.00426666666666664	0.407666666666667	1.11111111110729e-05	1.23287671232877e-05	0.008107917888563	0.432252454417952	1.23257520175658e-05
0.05	1	2	1e-04	0.01	2	0.5	5.16959109902781	0	1.11111111110729e-05	0.780855555555556	0	0	8.78048780484784e-05	0.792739659803044	0
0.005	-1.5	10	1e-04	0.01	2	0.5	5.68564485147016	0	0.118322222222222	0.000344444444444481	0	0	0.144821802482461	0.00216699029126236	0
0.01	-1.5	10	1e-04	0.01	2	0.5	6.28318077535079	0	0.00353333333333339	0.00438888888888889	0	0	0.00689045571797087	0.0106974744760881	0
0.05	-1.5	10	1e-04	0.01	2	0.5	6.48235941664433	0	0.0504	2.22222222222568e-05	0	0	0.0692351302241066	0.000473239436620454	0
0.005	-0.5	10	1e-04	0.01	2	0.5	5.93914494038922	0	0.00234444444444448	0.0187888888888889	0	0	0.0049508379888269	0.0316709030100334	0
0.01	-0.5	10	1e-04	0.01	2	0.5	5.57700195621914	0	0.0019555555555556	0.0579444444444445	0	0	0.00426256607400298	0.0777851435335898	0
0.05	-0.5	10	1e-04	0.01	2	0.5	5.81239489592969	0	0.000166666666666648	0.123577777777778	0	0	0.000609186140209441	0.147280294272202	0
0.005	1	10	1e-04	0.01	2	0.5	2.60742948602453	0.0238555555555556	0.7605	0.137022222222222	0.0231888888888889	0.024376841630998	0.82117840665874	0.161520997920998	0.0237062880324544
0.01	1	10	1e-04	0.01	2	0.5	3.09632251465413	0.00432222222222222	0.864388888888889	0.0246888888888889	0.00419999999999998	0.00451118269673263	0.868565581395349	0.0391432366305487	0.00438260869565215
0.05	1	10	1e-04	0.01	2	0.5	4.00167997507932	4.44444444444444e-05	0.0806666666666667	0.147855555555556	4.44444444444025e-05	4.84965119076257e-05	0.105326424870466	0.172675798146241	4.84615384614928e-05
0.005	-1.5	2	0.001	0.01	2	0.5	6.66343090872936	0	0.000122222222222246	0.0154	0	0	0.000488028169014179	0.027158041958042	0
0.01	-1.5	2	0.001	0.01	2	0.5	6.88977027383566	0	8.88888888889161e-05	0.00843333333333329	0	0	0.000392982456140471	0.0172080971659918	0
0.05	-1.5	2	0.001	0.01	2	0.5	6.88071669923141	0	8.88888888889161e-05	0.00572222222222218	0	0	0.000392982456140471	0.0129327354260089	0
0.005	-0.5	2	0.001	0.01	2	0.5	6.02062711182748	0	0	0.345944444444444	0	0	0	0.37061974492206	0
0.01	-0.5	2	0.001	0.01	2	0.5	5.90293064197221	0	0	0.602211111111111	0	0	0	0.621672644515248	0
0.05	-0.5	2	0.001	0.01	2	0.5	6.21075217851677	0	0	0.263622222222222	0	0	0	0.289257474600871	0
0.005	1	2	0.001	0.01	2	0.5	4.8708231370875	0	0.0423444444444444	0.0312666666666667	0	0	0.0594813622291022	0.047227972027972	0
0.01	1	2	0.001	0.01	2	0.5	5.23296612125757	0	0.00419999999999998	0.0813	0	0	0.00801480858224649	0.102239201552537	0
0.05	1	2	0.001	0.01	2	0.5	5.40498403873836	0	0	0.699822222222222	0	0	0	0.71559819657349	0
0.005	-1.5	10	0.001	0.01	2	0.5	6.1292700070785	0	0.140711111111111	2.22222222222568e-05	0	0	0.1663016154247	0.000473239436620454	0
0.01	-1.5	10	0.001	0.01	2	0.5	6.50046656585283	0	0.00702222222222226	0.000711111111111107	0	0	0.0121205479452055	0.00337053291536048	0
0.05	-1.5	10	0.001	0.01	2	0.5	6.23791290232953	0	0.0259777777777778	0.000433333333333286	0	0	0.0382830409356725	0.00255272727272699	0
0.005	-0.5	10	0.001	0.01	2	0.5	5.76712702290843	0	0.00211111111111106	0.0371888888888889	0	0	0.00454054054054044	0.0543106245975532	0
0.01	-0.5	10	0.001	0.01	2	0.5	5.29634114348733	0	0.000666666666666704	0.180377777777778	0	0	0.00168467966573826	0.206353997477932	0
0.05	-0.5	10	0.001	0.01	2	0.5	6.27412720074653	0	0.00124444444444449	0.00987777777777776	0	0	0.00291570247933896	0.0192929032258063	0
0.005	1	10	0.001	0.01	2	0.5	2.67985808285855	0.0189555555555556	0.800911111111111	0.0973777777777778	0.0184111111111112	0.0194047393364929	0.832169199178645	0.119315397082658	0.018855904267329
0.01	1	10	0.001	0.01	2	0.5	2.54405446379477	0.0288444444444444	0.896011111111111	0.0884444444444444	0.0280444444444444	0.029388679245283	0.897792445328032	0.109883319638455	0.0285864269662921
0.05	1	10	0.001	0.01	2	0.5	3.48562622263696	0.00103333333333333	0.0911999999999999	0.338633333333333	0.001	0.00109590834697218	0.116925720746184	0.362970510396975	0.00106080449017774
0.005	-1.5	2	0	0.1	2	0.5	6.42803796901882	0	6.66666666666593e-05	0.0584333333333333	0	0	0.000318315789473649	0.0783486845994679	0
0.01	-1.5	2	0	0.1	2	0.5	6.41898439441456	0	1.11111111110729e-05	0.1166	0	0	8.78048780484784e-05	0.140031135822081	0
0.05	-1.5	2	0	0.1	2	0.5	6.74491308016763	0	5.55555555555864e-05	0.0144555555555556	0	0	0.000276013143483176	0.0258660355029586	0
0.005	-0.5	2	0	0.1	2	0.5	5.46835906096812	0	0	0.954088888888889	0	0	0	0.958738856889677	0
0.01	-0.5	2	0	0.1	2	0.5	6.20169860391252	0	0	0.260933333333333	0	0	0	0.286792730797189	0
0.05	-0.5	2	0	0.1	2	0.5	6.42803796901882	0	0	0.111833333333333	0	0	0	0.134904759372507	0
0.005	1	2	0	0.1	2	0.5	3.04200106702862	0.00533333333333333	0.0264222222222222	0.878211111111111	0.00513333333333332	0.00554480861792345	0.0388622568093385	0.886024377224199	0.00534055045871558
0.01	1	2	0	0.1	2	0.5	4.75312666723222	0	0.00403333333333333	0.243311111111111	0	0	0.00772275221612495	0.269053924914676	0
0.05	1	2	0	0.1	2	0.5	5.24201969586182	0	0	0.777155555555556	0	0	0	0.789159973136333	0
0.005	-1.5	10	0	0.1	2	0.5	5.8848234927637	0	0.105811111111111	0.000144444444444392	0	0	0.132824564315353	0.00127223300970827	0
0.01	-1.5	10	0	0.1	2	0.5	6.42803796901882	0	0.00613333333333332	0.00134444444444448	0	0	0.0108759968725567	0.00473478260869578	0
0.05	-1.5	10	0	0.1	2	0.5	6.38277009599756	0	0.0389666666666667	8.88888888889161e-05	0	0	0.0552697936210132	0.000955450236967117	0
0.005	-0.5	10	0	0.1	2	0.5	5.61321625463615	0	0.00223333333333331	0.0504888888888889	0	0	0.00475382449554195	0.0693782490154499	0
0.01	-0.5	10	0	0.1	2	0.5	5.70375200067867	0	0.0019555555555556	0.0427888888888889	0	0	0.00426256607400298	0.0608433855799373	0
0.05	-0.5	10	0	0.1	2	0.5	5.99346638801473	0	0.000777777777777766	0.0304	0	0	0.00191947769314469	0.0462577658503857	0
0.005	1	10	0	0.1	2	0.5	2.65269735904579	0.0207222222222222	0.7393	0.136044444444444	0.0202111111111111	0.0211989174560216	0.810113043478261	0.160660661286123	0.0206853790613718
0.01	1	10	0	0.1	2	0.5	3.35887617817744	0.00163333333333333	0.885322222222222	0.00945555555555555	0.00160000000000005	0.00172257614508254	0.887278303137428	0.0187049280418665	0.00168742152987682
0.05	1	10	0	0.1	2	0.5	3.51278694644972	0.000822222222222222	0.124233333333333	0.261033333333333	0.000777777777777766	0.000873851921274602	0.150553673523911	0.286833139534884	0.00082700421940927
0.005	-1.5	2	1e-05	0.1	2	0.5	6.38277009599756	0	1.11111111110729e-05	0.0747333333333333	0	0	8.78048780484784e-05	0.095248777746558	0
0.01	-1.5	2	1e-05	0.1	2	0.5	6.76302022937613	0	3.33333333333297e-05	0.0183111111111111	0	0	0.000196108949416321	0.0310690093457944	0
0.05	-1.5	2	1e-05	0.1	2	0.5	6.81734167700164	0	0.000111111111111062	0.00948888888888888	0	0	0.000457765667574729	0.0187626852659111	0
0.005	-0.5	2	1e-05	0.1	2	0.5	6.31034149916354	0	0	0.118011111111111	0	0	0	0.141538445267054	0
0.01	-0.5	2	1e-05	0.1	2	0.5	5.64943055305316	0	0	0.890655555555556	0	0	0	0.898179991107159	0
0.05	-0.5	2	1e-05	0.1	2	0.5	5.98441281341047	0	0	0.497844444444444	0	0	0	0.519728975834292	0
0.005	1	2	1e-05	0.1	2	0.5	3.92019780364105	8.88888888888889e-05	0.0218222222222222	0.399244444444444	8.88888888889161e-05	9.62980654406496e-05	0.0324649393243686	0.424016108639663	9.62061560487052e-05
0.01	1	2	1e-05	0.1	2	0.5	4.68069807039821	1.11111111111111e-05	0.00512222222222225	0.236677777777778	1.11111111110729e-05	1.23287671232877e-05	0.00937627118644073	0.262358357771261	1.23257520175658e-05
0.05	1	2	1e-05	0.1	2	0.5	4.63543019737695	0	0	0.9993	0	0	0	0.999955555555556	0
0.005	-1.5	10	1e-05	0.1	2	0.5	5.72185914988717	0	0.168544444444444	0.000111111111111062	0	0	0.193695870281226	0.00109090909090861	0
0.01	-1.5	10	1e-05	0.1	2	0.5	6.0930557086615	0	0.0014777777777778	0.0148444444444444	0	0	0.00339230769230774	0.0264160062769713	0
0.05	-1.5	10	1e-05	0.1	2	0.5	6.11116285787	0	0.0215222222222222	0.000888888888888939	0	0	0.0320606896551724	0.00376822429906563	0
0.005	-0.5	10	1e-05	0.1	2	0.5	5.8848234927637	0	0.00177777777777777	0.0256	0	0	0.00396070726915518	0.0402920194309507	0
0.01	-0.5	10	1e-05	0.1	2	0.5	5.64943055305316	0	0.00165555555555552	0.0512333333333334	0	0	0.00374543640897748	0.0701250452625227	0
0.05	-0.5	10	1e-05	0.1	2	0.5	5.97535923880622	0	0.000477777777777799	0.0474222222222223	0	0	0.00130162162162168	0.0661461254612547	0
0.005	1	10	1e-05	0.1	2	0.5	2.75228667969256	0.0150333333333333	0.768077777777778	0.0989666666666666	0.0144444444444445	0.0154278733031674	0.825018044044518	0.121131354560173	0.0148369565217392
0.01	1	10	1e-05	0.1	2	0.5	2.52594731458627	0.0293888888888889	0.862533333333333	0.108811111111111	0.0286444444444445	0.0299366719065798	0.867698203592814	0.131512709832134	0.0291914625926758
0.05	1	10	1e-05	0.1	2	0.5	3.05105464163287	0.0053	0.0964222222222222	0.581522222222222	0.00516666666666665	0.00551268057784912	0.122995275590551	0.601273033963984	0.00537399678972711
0.005	-1.5	2	1e-04	0.1	2	0.5	6.52762728966559	0	3.33333333333297e-05	0.0350222222222222	0	0	0.000196108949416321	0.0515614410905549	0
0.01	-1.5	2	1e-04	0.1	2	0.5	6.78112737858464	0	4.44444444444025e-05	0.0159555555555555	0	0	0.00023773584905638	0.0278470180838783	0
0.05	-1.5	2	1e-04	0.1	2	0.5	6.48235941664433	0	1.11111111110729e-05	0.0629999999999999	0	0	8.78048780484784e-05	0.083353280839895	0
0.005	-0.5	2	1e-04	0.1	2	0.5	5.81239489592969	0	0	0.591877777777778	0	0	0	0.611283606557377	0
0.01	-0.5	2	1e-04	0.1	2	0.5	5.80334132132544	0	0	0.707366666666667	0	0	0	0.722661081081081	0
0.05	-0.5	2	1e-04	0.1	2	0.5	6.38277009599756	0	1.11111111110729e-05	0.135666666666667	0	0	8.78048780484784e-05	0.160339760291819	0
0.005	1	2	1e-04	0.1	2	0.5	4.99757318154702	0	0.0276999999999999	0.0321111111111111	0	0	0.0406099547511311	0.0482464392182842	0
0.01	1	2	1e-04	0.1	2	0.5	5.3959304641341	0	0.00918888888888891	0.0301444444444444	0	0	0.0149500717360115	0.0459459677419354	0
0.05	1	2	1e-04	0.1	2	0.5	5.48646621017662	0	0	0.522944444444444	0	0	0	0.543804676753783	0
0.005	-1.5	10	1e-04	0.1	2	0.5	5.95725208959772	0	0.130422222222222	9.9999999999989e-05	0	0	0.156258637083994	0.00101704035874428	0
0.01	-1.5	10	1e-04	0.1	2	0.5	6.48235941664433	0	0.00667777777777778	0.000744444444444436	0	0	0.0116367268536304	0.00344220183486235	0
0.05	-1.5	10	1e-04	0.1	2	0.5	6.15643073089126	0	0.0215777777777778	0.00065555555555552	0	0	0.032132895600788	0.00321470270270253	0
0.005	-0.5	10	1e-04	0.1	2	0.5	5.03378747996403	0	0.00126666666666664	0.261188888888889	0	0	0.00295707668553776	0.286934560426253	0
0.01	-0.5	10	1e-04	0.1	2	0.5	5.67659127686591	0	0.00188888888888894	0.0491444444444444	0	0	0.00414915254237299	0.0680046369737645	0
0.05	-0.5	10	1e-04	0.1	2	0.5	6.04778783564024	0	0.000933333333333342	0.0252888888888889	0	0	0.00224475079533406	0.0398992695652174	0
0.005	1	10	1e-04	0.1	2	0.5	2.2000186288332	0.0701111111111111	0.808533333333333	0.256477777777778	0.0686222222222223	0.0706877083796399	0.833082352941176	0.282169100169779	0.0692327402135232
0.01	1	10	1e-04	0.1	2	0.5	2.97862604479886	0.00652222222222222	0.770822222222222	0.0558444444444445	0.00637777777777782	0.00676842827728209	0.826087128712871	0.0754124441798155	0.00662004576659043
0.05	1	10	1e-04	0.1	2	0.5	3.15064396227964	0.00373333333333333	0.108911111111111	0.490933333333333	0.00364444444444445	0.00390193548387097	0.135831949408853	0.513222770223554	0.00380815480304078
0.005	-1.5	2	0.001	0.1	2	0.5	6.47330584204007	0	8.88888888889161e-05	0.0457888888888889	0	0	0.000392982456140471	0.0642744200433035	0
0.01	-1.5	2	0.001	0.1	2	0.5	6.79018095318889	0	3.33333333333297e-05	0.0161333333333333	0	0	0.000196108949416321	0.0280924376199616	0
0.05	-1.5	2	0.001	0.1	2	0.5	6.92598457225267	0	0.000177777777777832	0.00442222222222222	0	0	0.000638479809976443	0.0107498392282958	0
0.005	-0.5	2	0.001	0.1	2	0.5	6.45519869283157	0	2.22222222222568e-05	0.0585111111111111	0	0	0.000147584187408721	0.0784297872340425	0
0.01	-0.5	2	0.001	0.1	2	0.5	5.82144847053394	0	0	0.701888888888889	0	0	0	0.717388012618297	0
0.05	-0.5	2	0.001	0.1	2	0.5	6.36466294678905	0	0	0.1475	0	0	0	0.172393712960577	0
0.005	1	2	0.001	0.1	2	0.5	4.71691236881522	0	0.0207444444444445	0.0949333333333333	0	0	0.030922379231022	0.116983863080685	0
0.01	1	2	0.001	0.1	2	0.5	5.47741263557237	0	0.00554444444444446	0.0317	0	0	0.0100277511961723	0.0478029255319148	0
0.05	1	2	0.001	0.1	2	0.5	5.50457335938513	0	1.11111111110729e-05	0.517555555555556	0	0	8.78048780484784e-05	0.538447706422018	0
0.005	-1.5	10	0.001	0.1	2	0.5	5.65848412765741	0	0.110255555555556	0.000333333333333297	0	0	0.13701895890411	0.00212061711079921	0
0.01	-1.5	10	0.001	0.1	2	0.5	6.20169860391252	0	0.00270000000000004	0.00700000000000001	0	0	0.00555680580762258	0.0149140441521841	0
0.05	-1.5	10	0.001	0.1	2	0.5	6.38277009599756	0	0.0398888888888889	0.000122222222222246	0	0	0.0564719101123595	0.00116962025316478	0
0.005	-0.5	10	0.001	0.1	2	0.5	5.89387706736796	0	0.00174444444444444	0.0233222222222222	0	0	0.00390562685093779	0.0374741764080765	0
0.01	-0.5	10	0.001	0.1	2	0.5	5.54078765780213	0	0.000988888888888928	0.0909222222222222	0	0	0.00236332982086416	0.112653154875717	0
0.05	-0.5	10	0.001	0.1	2	0.5	6.06589498484874	0	0.000466666666666615	0.0374222222222222	0	0	0.00128290909090895	0.0545460154241646	0
0.005	1	10	0.001	0.1	2	0.5	3.22307255911366	0.00302222222222222	0.737466666666667	0.0333777777777777	0.00294444444444442	0.00316893203883495	0.80906931076179	0.0496887430259271	0.00308595194085025
0.01	1	10	0.001	0.1	2	0.5	2.47162586696076	0.0345333333333333	0.8508	0.127755555555556	0.0338000000000001	0.0351060510981623	0.858751401869159	0.151860377358491	0.0343836734693878
0.05	1	10	0.001	0.1	2	0.5	3.52184052105397	0.000922222222222222	0.135233333333333	0.240544444444444	0.000900000000000012	0.000978984320149778	0.160959958016269	0.266352562225476	0.000955394336531723
0.005	-1.5	2	0.01	0.1	2	0.5	6.42803796901882	0	5.55555555555864e-05	0.0572111111111111	0	0	0.000276013143483176	0.0769601423487544	0
0.01	-1.5	2	0.01	0.1	2	0.5	6.63627018491661	0	1.11111111110729e-05	0.0395666666666666	0	0	8.78048780484784e-05	0.0571028953229398	0
0.05	-1.5	2	0.01	0.1	2	0.5	6.67248448333362	0	6.66666666666593e-05	0.0244444444444445	0	0	0.000318315789473649	0.0388235294117648	0
0.005	-0.5	2	0.01	0.1	2	0.5	6.31034149916354	0	1.11111111110729e-05	0.117211111111111	0	0	8.78048780484784e-05	0.140690553056364	0
0.01	-0.5	2	0.01	0.1	2	0.5	6.15643073089126	0	0	0.303611111111111	0	0	0	0.328682577565633	0
0.05	-0.5	2	0.01	0.1	2	0.5	6.30128792455929	0	0	0.191688888888889	0	0	0	0.217974630233141	0
0.005	1	2	0.01	0.1	2	0.5	5.53173408319788	0	0.0500777777777778	0.00271111111111111	0	0	0.0688968152866242	0.00752607099143206	0
0.01	1	2	0.01	0.1	2	0.5	5.69469842607442	0	0.00751111111111114	0.0142444444444444	0	0	0.0127939917386407	0.0255993660855784	0
0.05	1	2	0.01	0.1	2	0.5	6.06589498484874	0	0.000144444444444392	0.0861777777777778	0	0	0.00054966442953	0.10762731277533	0
0.005	-1.5	10	0.01	0.1	2	0.5	5.55889480701064	0	0.0874111111111111	0.000933333333333342	0	0	0.112897722095672	0.00384872727272731	0
0.01	-1.5	10	0.01	0.1	2	0.5	6.40087724520606	0	0.00502222222222226	0.00178888888888884	0	0	0.00924170385395545	0.00565857740585759	0
0.05	-1.5	10	0.01	0.1	2	0.5	6.31939507376779	0	0.0351111111111111	0.000166666666666648	0	0	0.0503681214421252	0.00139483394833933	0
0.005	-0.5	10	0.01	0.1	2	0.5	6.06589498484874	0	0.00326666666666664	0.0101777777777777	0	0	0.00646774334351806	0.0197123825789922	0
0.01	-0.5	10	0.01	0.1	2	0.5	5.72185914988717	0	0.00212222222222225	0.0348111111111111	0	0	0.0045579545454546	0.0513500162495938	0
0.05	-0.5	10	0.01	0.1	2	0.5	6.1292700070785	0	0.000788888888888839	0.0234888888888889	0	0	0.00194056399132309	0.0376619300106045	0
0.005	1	10	0.01	0.1	2	0.5	3.21401898450941	0.00294444444444444	0.814122222222222	0.0231555555555556	0.00284444444444443	0.00308952116585704	0.834789873417721	0.0372459574468086	0.00298459403192226
0.01	1	10	0.01	0.1	2	0.5	3.51278694644972	0.00106666666666667	0.7836	0.0105777777777778	0.00102222222222226	0.00113099579242637	0.828160968793666	0.020313632514818	0.0010836176676794
0.05	1	10	0.01	0.1	2	0.5	3.78439418457727	0.000344444444444444	0.0675333333333333	0.263211111111111	0.000322222222222224	0.000369187145557656	0.0893093877551021	0.288876264214856	0.000345287030474842
0.005	-1.5	2	0	0.5	2	0.5	6.48235941664433	0	4.44444444444025e-05	0.0452333333333333	0	0	0.00023773584905638	0.0636524651162791	0
0.01	-1.5	2	0	0.5	2	0.5	6.90787742304416	0	8.88888888889161e-05	0.0076222222222222	0	0	0.000392982456140471	0.0158816720257234	0
0.05	-1.5	2	0	0.5	2	0.5	6.76302022937613	0	0.000133333333333319	0.0133666666666666	0	0	0.000519587628865922	0.0243303370786516	0
0.005	-0.5	2	0	0.5	2	0.5	6.00251996261898	0	0	0.363188888888889	0	0	0	0.387994536033914	0
0.01	-0.5	2	0	0.5	2	0.5	6.30128792455929	0	0	0.182288888888889	0	0	0	0.208382661290323	0
0.05	-0.5	2	0	0.5	2	0.5	6.38277009599756	0	0	0.135833333333333	0	0	0	0.160494920552227	0
0.005	1	2	0	0.5	2	0.5	5.16053752442356	0	0.0487666666666666	0.0114666666666666	0	0	0.0672919708029198	0.0215910336239103	0
0.01	1	2	0	0.5	2	0.5	4.11032287033034	5.55555555555556e-05	0.00283333333333335	0.652733333333333	5.55555555555864e-05	6.05042016806723e-05	0.00576581426648726	0.670167134449977	6.04751619870747e-05
0.05	1	2	0	0.5	2	0.5	4.78934096564923	0	0	0.996755555555556	0	0	0	0.998066828514677	0
0.005	-1.5	10	0	0.5	2	0.5	6.18359145470402	0	0.159033333333333	0	0	0	0.184447762720532	0	0
0.01	-1.5	10	0	0.5	2	0.5	6.06589498484874	0	0.00188888888888894	0.0137777777777778	0	0	0.00414915254237299	0.0248789808917197	0
0.05	-1.5	10	0	0.5	2	0.5	6.21075217851677	0	0.0253333333333333	0.000422222222222213	0	0	0.0374184304786714	0.00250680628272246	0
0.005	-0.5	10	0	0.5	2	0.5	5.57700195621914	0	0.000911111111111085	0.0856111111111111	0	0	0.00220415999999994	0.107037486218302	0
0.01	-0.5	10	0	0.5	2	0.5	5.64943055305316	0	0.00132222222222222	0.0646666666666667	0	0	0.00307254098360656	0.0849979716024341	0
0.05	-0.5	10	0	0.5	2	0.5	6.18359145470402	0	0.000677777777777777	0.0194555555555556	0	0	0.001708	0.0324808244387192	0
0.005	1	10	0	0.5	2	0.5	2.10948288279068	0.0876888888888889	0.860044444444444	0.253011111111111	0.0855777777777778	0.0881944124168514	0.865611892611493	0.278625491624181	0.0861093167701863
0.01	1	10	0	0.5	2	0.5	3.33171545436468	0.00194444444444444	0.898544444444444	0.00895555555555561	0.00182222222222217	0.00204925650557621	0.900131978798587	0.0179745132743364	0.00192044609665422
0.05	1	10	0	0.5	2	0.5	3.44941192421996	0.00112222222222222	0.0839444444444445	0.378444444444444	0.00106666666666666	0.00118879028491359	0.109243373493976	0.403247357293869	0.00113020322354589
0.005	-1.5	2	1e-05	0.5	2	0.5	6.20169860391252	0	0	0.164155555555556	0	0	0	0.189192073170732	0
0.01	-1.5	2	1e-05	0.5	2	0.5	6.63627018491661	0	2.22222222222568e-05	0.0405555555555556	0	0	0.000147584187408721	0.0581943074003795	0
0.05	-1.5	2	1e-05	0.5	2	0.5	6.80828810239739	0	0.000133333333333319	0.00967777777777779	0	0	0.000519587628865922	0.0190366001734606	0
0.005	-0.5	2	1e-05	0.5	2	0.5	6.07494855945299	0	0	0.290277777777778	0	0	0	0.315755395683453	0
0.01	-0.5	2	1e-05	0.5	2	0.5	5.83050204513819	0	0	0.6728	0	0	0	0.689677016949153	0
0.05	-0.5	2	1e-05	0.5	2	0.5	6.3737165213933	0	0	0.140888888888889	0	0	0	0.165562694300518	0
0.005	1	2	1e-05	0.5	2	0.5	3.57616196867948	0.000688888888888889	0.0157444444444444	0.671911111111111	0.00065555555555552	0.000733348979112884	0.0238056	0.689077277865702	0.000697864351091256
0.01	1	2	1e-05	0.5	2	0.5	4.78028739104498	0	0.00355555555555553	0.245311111111111	0	0	0.00692486045513092	0.271116394640682	0
0.05	1	2	1e-05	0.5	2	0.5	5.35066259111284	0	1.11111111110729e-05	0.643766666666667	0	0	8.78048780484784e-05	0.661709857239973	0
0.005	-1.5	10	1e-05	0.5	2	0.5	6.08400213405725	0	0.128211111111111	3.33333333333297e-05	0	0	0.154343312101911	0.000579310344827522	0
0.01	-1.5	10	1e-05	0.5	2	0.5	6.26507362614228	0	0.00406666666666666	0.00406666666666666	0	0	0.00778000843525938	0.0101521188772702	0
0.05	-1.5	10	1e-05	0.5	2	0.5	5.83955561974244	0	0.0128	0.00541111111111114	0	0	0.0199042852245458	0.0124088978766431	0
0.005	-0.5	10	1e-05	0.5	2	0.5	5.34160901650859	0	0.00187777777777776	0.106522222222222	0	0	0.00413074684772061	0.129193796791444	0
0.01	-0.5	10	1e-05	0.5	2	0.5	5.48646621017662	0	0.00142222222222221	0.0971777777777778	0	0	0.00327139959432047	0.119102512834369	0
0.05	-0.5	10	1e-05	0.5	2	0.5	6.00251996261898	0	0.000299999999999967	0.0480444444444444	0	0	0.00094961618981148	0.0667471975497703	0
0.005	1	10	1e-05	0.5	2	0.5	2.26339365106296	0.0605333333333333	0.813688888888889	0.227433333333333	0.0591111111111111	0.0611807486631016	0.834665943012212	0.253473611793612	0.0597832775919733
0.01	1	10	1e-05	0.5	2	0.5	2.86998314954784	0.00992222222222222	0.801688888888889	0.0627777777777778	0.00956666666666661	0.0102382165605096	0.832169199178645	0.0831658878504673	0.00987583067819749
0.05	1	10	1e-05	0.5	2	0.5	3.67575128932625	4e-04	0.104211111111111	0.225533333333333	0.000366666666666626	0.000428025477707006	0.131378988326848	0.251665239852399	0.00039254189284867
0.005	-1.5	2	1e-04	0.5	2	0.5	6.54573443887409	0	3.33333333333297e-05	0.0311111111111111	0	0	0.000196108949416321	0.0470556852284094	0
0.01	-1.5	2	1e-04	0.5	2	0.5	6.60910946110385	0	3.33333333333297e-05	0.0449888888888889	0	0	0.000196108949416321	0.0634347528753497	0
0.05	-1.5	2	1e-04	0.5	2	0.5	6.49141299124858	0	2.22222222222568e-05	0.0650444444444445	0	0	0.000147584187408721	0.0853214574898786	0
0.005	-0.5	2	1e-04	0.5	2	0.5	5.6403769784489	0	0	0.657888888888889	0	0	0	0.675154751131222	0
0.01	-0.5	2	1e-04	0.5	2	0.5	6.21980575312102	0	1.11111111110729e-05	0.245877777777778	0	0	8.78048780484784e-05	0.271627277155382	0
0.05	-0.5	2	1e-04	0.5	2	0.5	6.02968068643173	0	0	0.460855555555556	0	0	0	0.484346802594995	0
0.005	1	2	1e-04	0.5	2	0.5	4.59921589895994	0	0.0251777777777777	0.102944444444444	0	0	0.0372129032258064	0.125222847948512	0
0.01	1	2	1e-04	0.5	2	0.5	3.79344775918153	0.000244444444444444	0.00238888888888888	0.846922222222222	0.000244444444444492	0.000262437869822485	0.00502830626450115	0.85636183682568	0.000262437869822536
0.05	1	2	1e-04	0.5	2	0.5	5.19675182284056	0	2.22222222222568e-05	0.7687	0	0	0.000147584187408721	0.781098387096774	0
0.005	-1.5	10	1e-04	0.5	2	0.5	5.83955561974244	0	0.135766666666667	8.88888888889161e-05	0	0	0.161425321100917	0.000955450236967117	0
0.01	-1.5	10	1e-04	0.5	2	0.5	6.00251996261898	0	0.00239999999999996	0.0146888888888889	0	0	0.00504467099165885	0.026231811023622	0
0.05	-1.5	10	1e-04	0.5	2	0.5	6.19264502930827	0	0.0233222222222222	0.00068888888888885	0	0	0.0346283469721768	0.00331367974549292	0
0.005	-0.5	10	1e-04	0.5	2	0.5	5.48646621017662	0	0.00185555555555561	0.0777444444444444	0	0	0.00409776046738084	0.0983404350250975	0
0.01	-0.5	10	1e-04	0.5	2	0.5	5.80334132132544	0	0.00302222222222226	0.0221666666666667	0	0	0.0060497793468668	0.036012893982808	0
0.05	-0.5	10	1e-04	0.5	2	0.5	6.26507362614228	0	0.00112222222222225	0.0123111111111112	0	0	0.00265263157894743	0.0227745513866233	0
0.005	1	10	1e-04	0.5	2	0.5	2.33582224789698	0.0505888888888889	0.7911	0.210511111111111	0.0492888888888889	0.05122125	0.830655	0.237177943368107	0.0499384409202591
0.01	1	10	1e-04	0.5	2	0.5	2.6708045082543	0.0185	0.732088888888889	0.131166666666667	0.0180777777777777	0.0189469406186498	0.8064	0.155507579717721	0.0185186991869918
0.05	1	10	1e-04	0.5	2	0.5	3.57616196867948	0.000522222222222222	0.0830888888888889	0.316166666666667	0.000511111111111129	0.000557364705882353	0.108302068965517	0.341053983353151	0.00054550588235296
0.005	-1.5	2	0.001	0.5	2	0.5	6.31034149916354	0	3.33333333333297e-05	0.102177777777778	0	0	0.000196108949416321	0.124423731543624	0
0.01	-1.5	2	0.001	0.5	2	0.5	6.8626095500229	0	3.33333333333297e-05	0.0106777777777778	0	0	0.000196108949416321	0.0204623574144487	0
0.05	-1.5	2	0.001	0.5	2	0.5	6.47330584204007	0	1.11111111110729e-05	0.0713111111111111	0	0	8.78048780484784e-05	0.091452417302799	0
0.005	-0.5	2	0.001	0.5	2	0.5	6.03873426103599	0	1.11111111110729e-05	0.327522222222222	0	0	8.78048780484784e-05	0.351964179104478	0
0.01	-0.5	2	0.001	0.5	2	0.5	5.83050204513819	0	0	0.689722222222222	0	0	0	0.705907039711191	0
0.05	-0.5	2	0.001	0.5	2	0.5	6.03873426103599	0	0	0.415855555555556	0	0	0	0.440317647058824	0
0.005	1	2	0.001	0.5	2	0.5	3.29550115594767	0.00233333333333333	0.0316555555555555	0.699344444444444	0.00226666666666664	0.00245454545454545	0.0458167198468411	0.715270890642616	0.00238386274055179
0.01	1	2	0.001	0.5	2	0.5	4.83460883867049	0	0.00377777777777777	0.213377777777778	0	0	0.00729501915708811	0.239812091179386	0
0.05	1	2	0.001	0.5	2	0.5	5.76712702290843	0	3.33333333333297e-05	0.261833333333333	0	0	0.000196108949416321	0.287572881355932	0
0.005	-1.5	10	0.001	0.5	2	0.5	5.53173408319788	0	0.0826555555555556	0.00157777777777779	0	0	0.107799194939621	0.00522394160583945	0
0.01	-1.5	10	0.001	0.5	2	0.5	6.31034149916354	0	0.00532222222222223	0.00254444444444446	0	0	0.00968764044943821	0.00716869565217396	0
0.05	-1.5	10	0.001	0.5	2	0.5	6.12021643247425	0	0.0299777777777778	0.000566666666666715	0	0	0.0436951156812339	0.00300631578947394	0
0.005	-0.5	10	0.001	0.5	2	0.5	5.92103779118071	0	0.00357777777777779	0.0143888888888889	0	0	0.00696216216216219	0.0257670746150809	0
0.01	-0.5	10	0.001	0.5	2	0.5	5.57700195621914	0	0.0019555555555556	0.0573666666666667	0	0	0.00426256607400298	0.0771008	0
0.05	-0.5	10	0.001	0.5	2	0.5	6.14737715628701	0	0.000822222222222169	0.0237888888888889	0	0	0.00201056603773572	0.0380353894959464	0
0.005	1	10	0.001	0.5	2	0.5	2.54405446379477	0.0277333333333333	0.833055555555556	0.120388888888889	0.0270111111111111	0.0282756574511126	0.845544864622958	0.144009493670886	0.0275578947368421
0.01	1	10	0.001	0.5	2	0.5	3.39509047659444	0.00138888888888889	0.778266666666667	0.0159222222222222	0.0013333333333333	0.00146716348393107	0.827474649204864	0.0278316763005779	0.0014091332712022
0.05	1	10	0.001	0.5	2	0.5	3.83871563220279	0.000155555555555556	0.116211111111111	0.147755555555556	0.000155555555555575	0.000167920038077106	0.142881951219512	0.172603450939995	0.000167760342368067
0.005	-1.5	2	0.01	0.5	2	0.5	6.44614511822732	0	4.44444444444025e-05	0.0544	0	0	0.00023773584905638	0.0737693273542601	0
0.01	-1.5	2	0.01	0.5	2	0.5	6.25602005153803	0	1.11111111110729e-05	0.226466666666667	0	0	8.78048780484784e-05	0.252644564682735	0
0.05	-1.5	2	0.01	0.5	2	0.5	6.43709154362307	0	1.11111111110729e-05	0.0775888888888889	0	0	8.78048780484784e-05	0.0981984375000001	0
0.005	-0.5	2	0.01	0.5	2	0.5	5.57700195621914	0	0	0.864677777777778	0	0	0	0.872758878504673	0
0.01	-0.5	2	0.01	0.5	2	0.5	5.68564485147016	0	0	0.854877777777778	0	0	0	0.863828380485631	0
0.05	-0.5	2	0.01	0.5	2	0.5	6.29223434995504	0	1.11111111110729e-05	0.195011111111111	0	0	8.78048780484784e-05	0.221474812218328	0
0.005	1	2	0.01	0.5	2	0.5	4.39098368306215	2.22222222222222e-05	0.0277777777777778	0.150744444444444	2.22222222222568e-05	2.44541484716157e-05	0.0407108239095315	0.175507392197125	2.44541484716538e-05
0.01	1	2	0.01	0.5	2	0.5	4.73501951802372	0	0.00268888888888885	0.286588888888889	0	0	0.00554148114493404	0.312341950985103	0
0.05	1	2	0.01	0.5	2	0.5	5.93009136578496	0	2.22222222222568e-05	0.183188888888889	0	0	0.000147584187408721	0.209253286325862	0
0.005	-1.5	10	0.01	0.5	2	0.5	5.83955561974244	0	0.100922222222222	0.000255555555555564	0	0	0.127872402234637	0.00180560747663558	0
0.01	-1.5	10	0.01	0.5	2	0.5	6.07494855945299	0	0.00866666666666671	0.00375555555555551	0	0	0.0142589771490752	0.00954887892376671	0
0.05	-1.5	10	0.01	0.5	2	0.5	5.73091272449142	0	0.0129	0.00805555555555559	0	0	0.0200186110160794	0.016609090909091	0
0.005	-0.5	10	0.01	0.5	2	0.5	5.72185914988717	0	0.0022888888888889	0.0346777777777778	0	0	0.00484932274638021	0.05120390625	0
0.01	-0.5	10	0.01	0.5	2	0.5	5.8486091943467	0	0.00243333333333329	0.0226888888888889	0	0	0.00509819861431861	0.0367035663338088	0
0.05	-0.5	10	0.01	0.5	2	0.5	6.03873426103599	0	0.000466666666666615	0.0410777777777778	0	0	0.00128290909090895	0.0587788012618296	0
0.005	1	10	0.01	0.5	2	0.5	2.23623292725021	0.0645222222222222	0.827044444444444	0.227144444444444	0.0631444444444444	0.0651542297417631	0.841560161507402	0.253213860899484	0.06380556916908
0.01	1	10	0.01	0.5	2	0.5	3.76628703536877	0.000322222222222222	0.724077777777778	0.00618888888888891	0.000322222222222224	0.000345531914893617	0.799906673161228	0.01362096069869	0.000345287030474842
0.05	1	10	0.01	0.5	2	0.5	4.1555907433516	4.44444444444444e-05	0.108655555555556	0.0791444444444445	4.44444444444025e-05	4.84965119076257e-05	0.135550495049505	0.0999440979955457	4.84615384614928e-05
0.005	-1.5	2	0.1	0.5	2	0.5	5.36876974032135	0	1.11111111110729e-05	0.931033333333333	0	0	8.78048780484784e-05	0.937231957390147	0
0.01	-1.5	2	0.1	0.5	2	0.5	4.9070374355045	0	0	0.982844444444444	0	0	0	0.985887306501548	0
0.05	-1.5	2	0.1	0.5	2	0.5	6.04778783564024	0	0	0.347088888888889	0	0	0	0.371670254957507	0
0.005	-0.5	2	0.1	0.5	2	0.5	5.54984123240639	0	0	0.632322222222222	0	0	0	0.650388571428571	0
0.01	-0.5	2	0.1	0.5	2	0.5	5.58605553082339	0	0	0.724944444444444	0	0	0	0.739721457489878	0
0.05	-0.5	2	0.1	0.5	2	0.5	5.40498403873836	0	0	0.944055555555556	0	0	0	0.94949800443459	0
0.005	1	2	0.1	0.5	2	0.5	4.22801934018562	3.33333333333333e-05	0.0332111111111111	0.187522222222222	3.33333333333297e-05	3.64864864864865e-05	0.047869590085796	0.213583128295255	3.64776839565702e-05
0.01	1	2	0.1	0.5	2	0.5	3.52184052105397	0.000766666666666667	0.00322222222222224	0.948833333333333	0.000733333333333364	0.000815381008206331	0.00639370078740161	0.953668956348327	0.000779929660023479
0.05	1	2	0.1	0.5	2	0.5	4.61732304816845	0	0	0.992811111111111	0	0	0	0.995004684047724	0
0.005	-1.5	10	0.1	0.5	2	0.5	5.21485897204907	0	0.102188888888889	0.00346666666666662	0	0	0.129324853556485	0.00900618556701018	0
0.01	-1.5	10	0.1	0.5	2	0.5	5.72185914988717	0	0.000600000000000045	0.0821777777777778	0	0	0.0015472427515635	0.103228579340903	0
0.05	-1.5	10	0.1	0.5	2	0.5	6.12021643247425	0	0.0257111111111111	0.000711111111111107	0	0	0.0379393623942746	0.00337053291536048	0
0.005	-0.5	10	0.1	0.5	2	0.5	4.82555526406624	0	0.00355555555555553	0.216366666666667	0	0	0.00692486045513092	0.242655129789864	0
0.01	-0.5	10	0.1	0.5	2	0.5	4.8708231370875	0	0.000822222222222169	0.370322222222222	0	0	0.00201056603773572	0.39505682031985	0
0.05	-0.5	10	0.1	0.5	2	0.5	5.91198421657646	0	0.000366666666666626	0.0627	0	0	0.00108351791530933	0.0830871165644171	0
0.005	1	10	0.1	0.5	2	0.5	1.79260777164187	0.173522222222222	0.761255555555556	0.525066666666667	0.170255555555556	0.174136460176991	0.82117840665874	0.545761319890009	0.170971706885101
0.01	1	10	0.1	0.5	2	0.5	1.38519691445053	0.356622222222222	0.902955555555556	0.613344444444444	0.352122222222222	0.356936981465137	0.904351159196291	0.632158691206544	0.352433009708738
0.05	1	10	0.1	0.5	2	0.5	3.48562622263696	0.000911111111111111	0.0853222222222222	0.354011111111111	0.000844444444444425	0.000967415730337079	0.110750214592275	0.378725094339623	0.000897049180327849
0.005	-1.5	2	0	1e-05	5	0.5	6.70869878175062	0	0.000144444444444392	0.0112222222222222	0	0	0.00054966442953	0.0212365456821027	0
0.01	-1.5	2	0	1e-05	5	0.5	6.97125244527393	0	0.000177777777777832	0.00498888888888893	0	0	0.000638479809976443	0.011713043478261	0
0.05	-1.5	2	0	1e-05	5	0.5	6.48235941664433	0	3.33333333333297e-05	0.0678444444444445	0	0	0.000196108949416321	0.0881026052104209	0
0.005	-0.5	2	0	1e-05	5	0.5	6.25602005153803	0	0	0.150311111111111	0	0	0	0.175047804878049	0
0.01	-0.5	2	0	1e-05	5	0.5	6.38277009599756	0	2.22222222222568e-05	0.129266666666667	0	0	0.000147584187408721	0.153455535200209	0
0.05	-0.5	2	0	1e-05	5	0.5	5.67659127686591	0	0	0.874422222222222	0	0	0	0.882398042269188	0
0.005	1	2	0	1e-05	5	0.5	4.61732304816845	0	0.0313	0.0843333333333334	0	0	0.0453890025575448	0.105671582435791	0
0.01	1	2	0	1e-05	5	0.5	5.25107327046607	0	0.00586666666666669	0.0615888888888889	0	0	0.0105016574585636	0.0817580333625988	0
0.05	1	2	0	1e-05	5	0.5	5.99346638801473	0	2.22222222222568e-05	0.1431	0	0	0.000147584187408721	0.167900051733057	0
0.005	-1.5	10	0	1e-05	5	0.5	5.97535923880622	0	0.1021	3.33333333333297e-05	0	0	0.129256377337427	0.000579310344827522	0
0.01	-1.5	10	0	1e-05	5	0.5	6.17453788009976	0	0.00216666666666665	0.00888888888888884	0	0	0.0046336633663366	0.0179040852575487	0
0.05	-1.5	10	0	1e-05	5	0.5	6.28318077535079	0	0.0295444444444445	0.000266666666666637	0	0	0.043091189710611	0.00184390243902419	0
0.005	-0.5	10	0	1e-05	5	0.5	5.3778233149256	0	0.0022888888888889	0.0847333333333333	0	0	0.00484932274638021	0.106027696551724	0
0.01	-0.5	10	0	1e-05	5	0.5	5.67659127686591	0	0.00142222222222221	0.0505444444444444	0	0	0.00327139959432047	0.0694125340599454	0
0.05	-0.5	10	0	1e-05	5	0.5	6.08400213405725	0	0.000433333333333286	0.0343444444444444	0	0	0.00122314872433092	0.0508441253263707	0
0.005	1	10	0	1e-05	5	0.5	1.9736792637269	0.120788888888889	0.773144444444444	0.405944444444444	0.118477777777778	0.121350697674419	0.826457869934024	0.430627689429373	0.119081586527809
0.01	1	10	0	1e-05	5	0.5	2.73417953048406	0.0158444444444444	0.786333333333333	0.0920888888888889	0.0153888888888889	0.0162492425955234	0.828489466357308	0.113911971638942	0.0157891879665234
0.05	1	10	0	1e-05	5	0.5	3.03294749242437	0.0056	0.0925555555555555	0.604855555555555	0.00539999999999996	0.00582071494042163	0.118563117763344	0.6242604778157	0.0056154057771664
0.005	-1.5	2	0	1e-04	5	0.5	6.6181630357081	0	0.000155555555555575	0.0201555555555556	0	0	0.000578835110746587	0.0334524698133919	0
0.01	-1.5	2	0	1e-04	5	0.5	6.88977027383566	0	0.000111111111111062	0.00852222222222221	0	0	0.000457765667574729	0.0173038495971352	0
0.05	-1.5	2	0	1e-04	5	0.5	6.74491308016763	0	6.66666666666593e-05	0.0151111111111111	0	0	0.000318315789473649	0.0267959343236903	0
0.005	-0.5	2	0	1e-04	5	0.5	5.70375200067867	0	0	0.7279	0	0	0	0.742300899280576	0
0.01	-0.5	2	0	1e-04	5	0.5	5.8848234927637	0	0	0.622555555555556	0	0	0	0.641069693530079	0
0.05	-0.5	2	0	1e-04	5	0.5	6.21075217851677	0	0	0.263922222222222	0	0	0	0.28951661426844	0
0.005	1	2	0	1e-04	5	0.5	5.16959109902781	0	0.0409888888888889	0.0147111111111111	0	0	0.0578440298507463	0.0262611570247934	0
0.01	1	2	0	1e-04	5	0.5	5.1152696514023	0	0.0093333333333333	0.0670666666666667	0	0	0.0151470483005366	0.0873571059431525	0
0.05	1	2	0	1e-04	5	0.5	5.56794838161489	0	0	0.557566666666667	0	0	0	0.577820973269363	0
0.005	-1.5	10	0	1e-04	5	0.5	6.06589498484874	0	0.123722222222222	2.22222222222568e-05	0	0	0.150054545454545	0.000473239436620454	0
0.01	-1.5	10	0	1e-04	5	0.5	6.24696647693378	0	0.00297777777777775	0.00549999999999995	0	0	0.00598193091231172	0.0125556114745847	0
0.05	-1.5	10	0	1e-04	5	0.5	6.21980575312102	0	0.0254333333333333	0.000399999999999956	0	0	0.03755390625	0.00241276595744654	0
0.005	-0.5	10	0	1e-04	5	0.5	5.82144847053394	0	0.0019555555555556	0.0319222222222222	0	0	0.00426256607400298	0.0480262686567164	0
0.01	-0.5	10	0	1e-04	5	0.5	5.26012684507033	0	0.000666666666666704	0.229677777777778	0	0	0.00168467966573826	0.255786496439971	0
0.05	-0.5	10	0	1e-04	5	0.5	5.99346638801473	0	0.000711111111111107	0.0383222222222223	0	0	0.00177621145374448	0.0555898944675408	0
0.005	1	10	0	1e-04	5	0.5	1.91935781610139	0.135011111111111	0.771777777777778	0.437555555555556	0.1326	0.135549003984064	0.826087128712871	0.461677599441731	0.133216744186047
0.01	1	10	0	1e-04	5	0.5	3.67575128932625	0.000411111111111111	0.6688	0.0115555555555555	0.00041111111111114	0.000439811320754717	0.749056	0.0216953642384106	0.000439707616128302
0.05	1	10	0	1e-04	5	0.5	4.07410857191333	6.66666666666667e-05	0.0726222222222223	0.135255555555556	6.66666666666593e-05	7.24484906564447e-05	0.0955101188750363	0.159895543393276	7.24137931034403e-05
0.005	-1.5	2	1e-05	1e-04	5	0.5	6.63627018491661	0	0.000133333333333319	0.0185888888888889	0	0	0.000519587628865922	0.0314225698324022	0
0.01	-1.5	2	1e-05	1e-04	5	0.5	6.88071669923141	0	0.000166666666666648	0.00917777777777773	0	0	0.000609186140209441	0.018242944785276	0
0.05	-1.5	2	1e-05	1e-04	5	0.5	6.48235941664433	0	1.11111111110729e-05	0.0679666666666666	0	0	8.78048780484784e-05	0.0882108154506437	0
0.005	-0.5	2	1e-05	1e-04	5	0.5	6.43709154362307	0	2.22222222222568e-05	0.0637777777777778	0	0	0.000147584187408721	0.0840976744186047	0
0.01	-0.5	2	1e-05	1e-04	5	0.5	5.69469842607442	0	0	0.817966666666667	0	0	0	0.829116603351955	0
0.05	-0.5	2	1e-05	1e-04	5	0.5	6.15643073089126	0	0	0.313155555555556	0	0	0	0.338127493453939	0
0.005	1	2	1e-05	1e-04	5	0.5	4.85271598787899	0	0.0258	0.0544888888888889	0	0	0.038033409164771	0.0738677824267783	0
0.01	1	2	1e-05	1e-04	5	0.5	4.77123381644073	0	0.00275555555555551	0.254511111111111	0	0	0.00563788903924213	0.280141324921136	0
0.05	1	2	1e-05	1e-04	5	0.5	5.26012684507033	0	0	0.861077777777778	0	0	0	0.869705811623246	0
0.005	-1.5	10	1e-05	1e-04	5	0.5	6.06589498484874	0	0.1252	3.33333333333297e-05	0	0	0.151361194029851	0.000579310344827522	0
0.01	-1.5	10	1e-05	1e-04	5	0.5	6.25602005153803	0	0.00298888888888893	0.00503333333333333	0	0	0.00599363395225472	0.0117808049535604	0
0.05	-1.5	10	1e-05	1e-04	5	0.5	6.18359145470402	0	0.0238444444444444	0.000622222222222191	0	0	0.0353343351845802	0.00314648829431422	0
0.005	-0.5	10	1e-05	1e-04	5	0.5	5.74901987369993	0	0.00313333333333332	0.0258222222222222	0	0	0.00625013192612135	0.0405433021806853	0
0.01	-0.5	10	1e-05	1e-04	5	0.5	5.30539471809159	0	0.000822222222222169	0.1674	0	0	0.00201056603773572	0.192526977687627	0
0.05	-0.5	10	1e-05	1e-04	5	0.5	6.13832358168276	0	0.000811111111111096	0.0245	0	0	0.00198660907127426	0.0388981449072453	0
0.005	1	10	1e-05	1e-04	5	0.5	2.29960794947997	0.0548444444444444	0.803177777777778	0.218377777777778	0.0535	0.055468093645485	0.832169199178645	0.244583111111111	0.054144578313253
0.01	1	10	1e-05	1e-04	5	0.5	2.43541156854375	0.0379333333333333	0.832566666666667	0.151655555555556	0.0369777777777778	0.038519274680994	0.845237779767234	0.176387076923077	0.0375741935483871
0.05	1	10	1e-05	1e-04	5	0.5	2.29960794947997	0.0539666666666667	0.118111111111111	0.939688888888889	0.0524555555555556	0.0546168674698795	0.144641468682505	0.945315768463074	0.0531231078365707
0.005	-1.5	2	0	0.001	5	0.5	6.59100231189535	0	5.55555555555864e-05	0.0239888888888888	0	0	0.000276013143483176	0.0382473110720562	0
0.01	-1.5	2	0	0.001	5	0.5	6.71775235635487	0	4.44444444444025e-05	0.0263111111111111	0	0	0.00023773584905638	0.0410833734939758	0
0.05	-1.5	2	0	0.001	5	0.5	6.8445024008144	0	9.9999999999989e-05	0.0078555555555555	0	0	0.00042832861189797	0.0162484268125854	0
0.005	-0.5	2	0	0.001	5	0.5	6.14737715628701	0	1.11111111110729e-05	0.227044444444444	0	0	8.78048780484784e-05	0.253164601769912	0
0.01	-0.5	2	0	0.001	5	0.5	6.01157353722323	0	0	0.463488888888889	0	0	0	0.486888744789254	0
0.05	-0.5	2	0	0.001	5	0.5	5.96630566420197	0	0	0.538311111111111	0	0	0	0.558631708991078	0
0.005	1	2	0	0.001	5	0.5	4.11032287033034	8.88888888888889e-05	0.0218666666666667	0.299277777777778	8.88888888889161e-05	9.62980654406496e-05	0.032520393442623	0.324223549080487	9.62061560487052e-05
0.01	1	2	0	0.001	5	0.5	5.45025191175962	0	0.00466666666666671	0.0433333333333333	0	0	0.0087434944237919	0.0615211267605634	0
0.05	1	2	0	0.001	5	0.5	5.79428774672119	0	2.22222222222568e-05	0.299677777777778	0	0	0.000147584187408721	0.324579369627507	0
0.005	-1.5	10	0	0.001	5	0.5	6.03873426103599	0	0.116622222222222	7.77777777777322e-05	0	0	0.143272983216026	0.000902301790280801	0
0.01	-1.5	10	0	0.001	5	0.5	6.02062711182748	0	0.00202222222222226	0.0175222222222222	0	0	0.00437633587786267	0.0299814409656733	0
0.05	-1.5	10	0	0.001	5	0.5	6.36466294678905	0	0.0374555555555556	8.88888888889161e-05	0	0	0.0533768143261075	0.000955450236967117	0
0.005	-0.5	10	0	0.001	5	0.5	5.8848234927637	0	0.00238888888888888	0.0228111111111111	0	0	0.00502830626450115	0.036848717948718	0
0.01	-0.5	10	0	0.001	5	0.5	5.89387706736796	0	0.00313333333333332	0.0160111111111111	0	0	0.00625013192612135	0.0279224913494809	0
0.05	-0.5	10	0	0.001	5	0.5	5.55889480701064	0	0.000388888888888883	0.161088888888889	0	0	0.00113222079589215	0.186117982679572	0
0.005	1	10	0	0.001	5	0.5	1.9555721145184	0.124855555555556	0.809166666666667	0.378344444444444	0.122144444444444	0.125408503100089	0.833299069239501	0.40323552631579	0.12273974302171
0.01	1	10	0	0.001	5	0.5	1.33992904142927	0.3788	0.947122222222222	0.563333333333333	0.374133333333333	0.379050694904037	0.947331069459757	0.58326409495549	0.374380939774983
0.05	1	10	0	0.001	5	0.5	3.97451925126656	4.44444444444444e-05	0.0912666666666667	0.1394	4.44444444444025e-05	4.84965119076257e-05	0.116978129415089	0.164025525291829	4.84615384614928e-05
0.005	-1.5	2	1e-05	0.001	5	0.5	6.80828810239739	0	0.000199999999999978	0.00571111111111111	0	0	0.000698921417565408	0.0129140578265204	0
0.01	-1.5	2	1e-05	0.001	5	0.5	6.70869878175062	0	5.55555555555864e-05	0.0256555555555555	0	0	0.000276013143483176	0.0403514563106796	0
0.05	-1.5	2	1e-05	0.001	5	0.5	6.71775235635487	0	9.9999999999989e-05	0.0177888888888889	0	0	0.00042832861189797	0.0303461451673561	0
0.005	-0.5	2	1e-05	0.001	5	0.5	6.00251996261898	0	1.11111111110729e-05	0.364944444444444	0	0	8.78048780484784e-05	0.389686440677966	0
0.01	-0.5	2	1e-05	0.001	5	0.5	6.05684141024449	0	0	0.412444444444444	0	0	0	0.437011913104415	0
0.05	-0.5	2	1e-05	0.001	5	0.5	6.26507362614228	0	0	0.2211	0	0	0	0.247181074420897	0
0.005	1	2	1e-05	0.001	5	0.5	5.6222698292404	0	0.0694333333333333	0.00125555555555557	0	0	0.0916350305498982	0.00449148264984231	0
0.01	1	2	1e-05	0.001	5	0.5	4.63543019737695	0	0.00375555555555551	0.290255555555556	0	0	0.00726138107416871	0.315755395683453	0
0.05	1	2	1e-05	0.001	5	0.5	6.1292700070785	0	5.55555555555864e-05	0.0777333333333333	0	0	0.000276013143483176	0.0983404350250975	0
0.005	-1.5	10	1e-05	0.001	5	0.5	6.12021643247425	0	0.139133333333333	2.22222222222568e-05	0	0	0.164737353171496	0.000473239436620454	0
0.01	-1.5	10	1e-05	0.001	5	0.5	6.3556093721848	0	0.00470000000000004	0.00237777777777781	0	0	0.00878056013179579	0.00682201138519934	0
0.05	-1.5	10	1e-05	0.001	5	0.5	6.20169860391252	0	0.0234444444444445	0.000633333333333375	0	0	0.0347984293193718	0.00318139534883742	0
0.005	-0.5	10	1e-05	0.001	5	0.5	5.57700195621914	0	0.00175555555555551	0.0609444444444445	0	0	0.00392662721893481	0.0810924024640657	0
0.01	-0.5	10	1e-05	0.001	5	0.5	5.59510910542765	0	0.00136666666666663	0.0681666666666667	0	0	0.00316124426313096	0.0883945111492282	0
0.05	-0.5	10	1e-05	0.001	5	0.5	5.80334132132544	0	0.000277777777777821	0.101266666666667	0	0	0.000896159317212089	0.12348	0
0.005	1	10	1e-05	0.001	5	0.5	2.17285790502044	0.0745888888888889	0.763144444444444	0.309266666666667	0.0727666666666666	0.0751521990226566	0.822457590876693	0.334246747676912	0.0733488
0.01	1	10	1e-05	0.001	5	0.5	3.59426911788799	0.000522222222222222	0.699711111111111	0.0132111111111111	0.000522222222222202	0.000557364705882353	0.780400688468158	0.0241052292839903	0.000556709753231471
0.05	1	10	1e-05	0.001	5	0.5	3.38603690199019	0.00143333333333333	0.0894555555555555	0.404255555555556	0.00138888888888888	0.00151305562020014	0.115046895378509	0.429036780533458	0.0014657980456026
0.005	-1.5	2	1e-04	0.001	5	0.5	6.50046656585283	0	7.77777777777322e-05	0.0394444444444444	0	0	0.000355287009063236	0.0569808917197451	0
0.01	-1.5	2	1e-04	0.001	5	0.5	7.01652031829519	0	0.000133333333333319	0.00288888888888894	0	0	0.000519587628865922	0.00790826795413412	0
0.05	-1.5	2	1e-04	0.001	5	0.5	6.8263952516059	0	0.000122222222222246	0.00821111111111106	0	0	0.000488028169014179	0.0168608420099591	0
0.005	-0.5	2	1e-04	0.001	5	0.5	6.28318077535079	0	1.11111111110729e-05	0.132555555555556	0	0	8.78048780484784e-05	0.157031078610603	0
0.01	-0.5	2	1e-04	0.001	5	0.5	6.18359145470402	0	1.11111111110729e-05	0.278066666666667	0	0	8.78048780484784e-05	0.303637554164661	0
0.05	-0.5	2	1e-04	0.001	5	0.5	6.31034149916354	0	0	0.184033333333333	0	0	0	0.210059184700554	0
0.005	1	2	1e-04	0.001	5	0.5	5.28728756888308	0	0.0382666666666667	0.0101555555555556	0	0	0.0544130407523511	0.0196777445536096	0
0.01	1	2	1e-04	0.001	5	0.5	4.19180504176861	1.11111111111111e-05	0.00502222222222226	0.516077777777778	1.11111111110729e-05	1.23287671232877e-05	0.00924170385395545	0.537156677374943	1.23257520175658e-05
0.05	1	2	1e-04	0.001	5	0.5	5.35066259111284	0	0	0.609533333333333	0	0	0	0.628659208731241	0
0.005	-1.5	10	1e-04	0.001	5	0.5	5.98441281341047	0	0.109244444444444	8.88888888889161e-05	0	0	0.136125679758308	0.000955450236967117	0
0.01	-1.5	10	1e-04	0.001	5	0.5	6.23791290232953	0	0.00286666666666668	0.0061444444444444	0	0	0.00581538461538465	0.0135560311284046	0
0.05	-1.5	10	1e-04	0.001	5	0.5	6.18359145470402	0	0.0221888888888889	0.000633333333333375	0	0	0.0329779816513762	0.00318139534883742	0
0.005	-0.5	10	1e-04	0.001	5	0.5	5.85766276895095	0	0.00286666666666668	0.0193	0	0	0.00581538461538465	0.0322686325101364	0
0.01	-0.5	10	1e-04	0.001	5	0.5	5.43214476255111	0	0.000933333333333342	0.121244444444444	0	0	0.00224475079533406	0.144880084299262	0
0.05	-0.5	10	1e-04	0.001	5	0.5	5.56794838161489	0	0.000322222222222224	0.162555555555556	0	0	0.000995640326975482	0.187586466547952	0
0.005	1	10	1e-04	0.001	5	0.5	2.35392939710548	0.0475333333333333	0.848466666666667	0.166655555555556	0.0464666666666667	0.0481489950870925	0.858497613205443	0.19186538071066	0.0471000670391061
0.01	1	10	1e-04	0.001	5	0.5	2.82471527652658	0.0111666666666667	0.695666666666667	0.107933333333333	0.0108444444444444	0.0115039745627981	0.776844903988183	0.130625827107791	0.0111796363636364
0.05	1	10	1e-04	0.001	5	0.5	2.48973301616926	0.0329444444444444	0.167777777777778	0.770666666666667	0.0320777777777778	0.0335058295964126	0.192863659401926	0.782921388577828	0.0326463540498093
0.005	-1.5	2	0	0.01	5	0.5	6.55478801347834	0	0.000111111111111062	0.0293111111111111	0	0	0.000457765667574729	0.0449021276595744	0
0.01	-1.5	2	0	0.01	5	0.5	6.94409172146117	0	0.000155555555555575	0.00597777777777775	0	0	0.000578835110746587	0.0133113402061855	0
0.05	-1.5	2	0	0.01	5	0.5	6.80828810239739	0	0.000199999999999978	0.00965555555555553	0	0	0.000698921417565408	0.0190011279826464	0
0.005	-0.5	2	0	0.01	5	0.5	6.3737165213933	0	4.44444444444025e-05	0.0872888888888889	0	0	0.00023773584905638	0.108715650741351	0
0.01	-0.5	2	0	0.01	5	0.5	6.21075217851677	0	0	0.253333333333333	0	0	0	0.278912621359223	0
0.05	-0.5	2	0	0.01	5	0.5	5.85766276895095	0	1.11111111110729e-05	0.644644444444444	0	0	8.78048780484784e-05	0.662461984594472	0
0.005	1	2	0	0.01	5	0.5	5.17864467363206	0	0.0358666666666667	0.0154111111111112	0	0	0.0513545454545455	0.027158041958042	0
0.01	1	2	0	0.01	5	0.5	5.8848234927637	0	0.00975555555555552	0.00546666666666662	0	0	0.0156641415929203	0.0125109989909182	0
0.05	1	2	0	0.01	5	0.5	6.08400213405725	0	5.55555555555864e-05	0.0946888888888889	0	0	0.000276013143483176	0.116777814029364	0
0.005	-1.5	10	0	0.01	5	0.5	6.11116285787	0	0.136177777777778	1.11111111110729e-05	0	0	0.161829290018339	0.000359999999998761	0
0.01	-1.5	10	0	0.01	5	0.5	6.34655579758055	0	0.00423333333333331	0.00277777777777777	0	0	0.00805807805287449	0.00766889835666461	0
0.05	-1.5	10	0	0.01	5	0.5	6.31034149916354	0	0.0339444444444444	0.000166666666666648	0	0	0.0488180088776157	0.00139483394833933	0
0.005	-0.5	10	0	0.01	5	0.5	5.69469842607442	0	0.00139999999999996	0.0545666666666667	0	0	0.00322682926829258	0.0739290322580645	0
0.01	-0.5	10	0	0.01	5	0.5	5.67659127686591	0	0.00129999999999997	0.0661333333333334	0	0	0.00302710472279253	0.0864000000000001	0
0.05	-0.5	10	0	0.01	5	0.5	5.75807344830418	0	0.000133333333333319	0.136922222222222	0	0	0.000519587628865922	0.161445074083702	0
0.005	1	10	0	0.01	5	0.5	2.4625722923565	0.0355111111111111	0.756666666666667	0.187544444444444	0.0346	0.0360838709677419	0.81979746835443	0.213583128295255	0.0351817081371889
0.01	1	10	0	0.01	5	0.5	2.23623292725021	0.0634	0.856366666666667	0.205555555555556	0.0619	0.0640495322939866	0.862642504996669	0.232171314741036	0.0625759750390015
0.05	1	10	0	0.01	5	0.5	3.30455473055193	0.00197777777777778	0.0931555555555555	0.439388888888889	0.00196666666666667	0.00208293475737172	0.119264352243861	0.46328870292887	0.00207123287671233
0.005	-1.5	2	1e-05	0.01	5	0.5	6.73585950556338	0	0.000322222222222224	0.00982222222222218	0	0	0.000995640326975482	0.0192124191461836	0
0.01	-1.5	2	1e-05	0.01	5	0.5	6.90787742304416	0	8.88888888889161e-05	0.00736666666666663	0	0	0.000392982456140471	0.0154771653543306	0
0.05	-1.5	2	1e-05	0.01	5	0.5	6.69059163254212	0	5.55555555555864e-05	0.0218666666666667	0	0	0.000276013143483176	0.0356531991373113	0
0.005	-0.5	2	1e-05	0.01	5	0.5	6.24696647693378	0	2.22222222222568e-05	0.151977777777778	0	0	0.000147584187408721	0.176716534221994	0
0.01	-0.5	2	1e-05	0.01	5	0.5	5.83955561974244	0	0	0.680611111111111	0	0	0	0.697033137697517	0
0.05	-0.5	2	1e-05	0.01	5	0.5	6.17453788009976	0	0	0.295811111111111	0	0	0	0.321004593301435	0
0.005	1	2	1e-05	0.01	5	0.5	5.18769824823631	0	0.0415777777777778	0.0125444444444445	0	0	0.0585704347826088	0.0230948905109489	0
0.01	1	2	1e-05	0.01	5	0.5	5.25107327046607	0	0.00867777777777778	0.0462777777777778	0	0	0.0142720812182741	0.0647888888888889	0
0.05	1	2	1e-05	0.01	5	0.5	5.47741263557237	0	2.22222222222568e-05	0.422055555555556	0	0	0.000147584187408721	0.446257342657343	0
0.005	-1.5	10	1e-05	0.01	5	0.5	6.03873426103599	0	0.117166666666667	7.77777777777322e-05	0	0	0.143717685235262	0.000902301790280801	0
0.01	-1.5	10	1e-05	0.01	5	0.5	6.3737165213933	0	0.0048111111111111	0.00205555555555559	0	0	0.00894760147601474	0.00619946808510648	0
0.05	-1.5	10	1e-05	0.01	5	0.5	6.24696647693378	0	0.0287111111111111	0.000333333333333297	0	0	0.0419972911963883	0.00212061711079921	0
0.005	-0.5	10	1e-05	0.01	5	0.5	6.20169860391252	0	0.00468888888888885	0.00422222222222224	0	0	0.00877063917525767	0.0103804878048781	0
0.01	-0.5	10	1e-05	0.01	5	0.5	5.6041626800319	0	0.00102222222222226	0.0796555555555556	0	0	0.00243785488958999	0.100463719766472	0
0.05	-0.5	10	1e-05	0.01	5	0.5	6.32844864837204	0	0.00144444444444447	0.0078111111111111	0	0	0.00332083122149018	0.0161786301369863	0
0.005	1	10	1e-05	0.01	5	0.5	1.98273283833116	0.115944444444444	0.776577777777778	0.394877777777778	0.113722222222222	0.116509525919362	0.827474649204864	0.419771642840403	0.114327127659574
0.01	1	10	1e-05	0.01	5	0.5	2.77039382890107	0.0140888888888889	0.849833333333333	0.0642222222222222	0.0136555555555555	0.0144815771583956	0.858751401869159	0.0845608127721335	0.01404253003854
0.05	1	10	1e-05	0.01	5	0.5	3.61237626709649	0.000533333333333333	0.122011111111111	0.221133333333333	0.000522222222222202	0.000568822007994357	0.148482618025751	0.247181074420897	0.000556709753231471
0.005	-1.5	2	1e-04	0.01	5	0.5	6.83544882621015	0	0.000433333333333286	0.0049555555555556	0	0	0.00122314872433092	0.0116649714582253	0
0.01	-1.5	2	1e-04	0.01	5	0.5	6.91693099764842	0	6.66666666666593e-05	0.00660000000000005	0	0	0.000318315789473649	0.0143105162523902	0
0.05	-1.5	2	1e-04	0.01	5	0.5	6.85355597541865	0	0.000177777777777832	0.00727777777777783	0	0	0.000638479809976443	0.0153902097902099	0
0.005	-0.5	2	1e-04	0.01	5	0.5	6.25602005153803	0	0	0.146555555555556	0	0	0	0.171581109677419	0
0.01	-0.5	2	1e-04	0.01	5	0.5	5.53173408319788	0	0	0.971344444444444	0	0	0	0.974782831858407	0
0.05	-0.5	2	1e-04	0.01	5	0.5	5.98441281341047	0	0	0.514511111111111	0	0	0	0.535771900826446	0
0.005	1	2	1e-04	0.01	5	0.5	4.95230530852576	0	0.0315333333333333	0.0339444444444444	0	0	0.0456689655172413	0.0503835078534031	0
0.01	1	2	1e-04	0.01	5	0.5	5.33255544190434	0	0.00646666666666662	0.0512111111111111	0	0	0.0113560975609755	0.0701157862964081	0
0.05	1	2	1e-04	0.01	5	0.5	5.8848234927637	0	7.77777777777322e-05	0.159077777777778	0	0	0.000355287009063236	0.184135544781832	0
0.005	-1.5	10	1e-04	0.01	5	0.5	6.03873426103599	0	0.117788888888889	4.44444444444025e-05	0	0	0.144363793569306	0.000669767441859834	0
0.01	-1.5	10	1e-04	0.01	5	0.5	6.3737165213933	0	0.00738888888888889	0.00129999999999997	0	0	0.0126284853051997	0.00461408450704214	0
0.05	-1.5	10	1e-04	0.01	5	0.5	6.0930557086615	0	0.0235222222222222	0.001	0	0	0.0349024533856722	0.00399295774647888	0
0.005	-0.5	10	1e-04	0.01	5	0.5	5.8848234927637	0	0.00194444444444442	0.0241666666666667	0	0	0.0042465093885411	0.0384766584766585	0
0.01	-0.5	10	1e-04	0.01	5	0.5	5.3597161657171	0	0.00171111111111111	0.109855555555556	0	0	0.00384618434093161	0.132704340878828	0
0.05	-0.5	10	1e-04	0.01	5	0.5	6.12021643247425	0	0.000522222222222202	0.0262888888888889	0	0	0.00138364485981303	0.041076954874268	0
0.005	1	10	1e-04	0.01	5	0.5	2.88809029875634	0.00917777777777778	0.749555555555556	0.0739111111111111	0.00887777777777776	0.00947868852459016	0.815293406856869	0.0943599211933578	0.00917302961275625
0.01	1	10	1e-04	0.01	5	0.5	2.76134025429682	0.0147555555555556	0.817722222222222	0.0773444444444444	0.0143555555555556	0.0151530903328051	0.836642271293375	0.0979437185929648	0.0147489920724802
0.05	1	10	1e-04	0.01	5	0.5	4.50868015291742	0	0.0750111111111111	0.0497222222222222	0	0	0.0984805788712012	0.0686157590508062	0
0.005	-1.5	2	0.001	0.01	5	0.5	6.72680593095913	0	0.000177777777777832	0.0105888888888889	0	0	0.000638479809976443	0.0203263647905205	0
0.01	-1.5	2	0.001	0.01	5	0.5	6.83544882621015	0	0.000111111111111062	0.0121222222222223	0	0	0.000457765667574729	0.0225354098360656	0
0.05	-1.5	2	0.001	0.01	5	0.5	6.83544882621015	0	0.000155555555555575	0.00851111111111114	0	0	0.000578835110746587	0.0173038495971352	0
0.005	-0.5	2	0.001	0.01	5	0.5	6.18359145470402	0	0	0.198222222222222	0	0	0	0.224727818045489	0
0.01	-0.5	2	0.001	0.01	5	0.5	5.79428774672119	0	0	0.735355555555556	0	0	0	0.749377358490566	0
0.05	-0.5	2	0.001	0.01	5	0.5	6.08400213405725	0	1.11111111110729e-05	0.395222222222222	0	0	8.78048780484784e-05	0.420039362699157	0
0.005	1	2	0.001	0.01	5	0.5	5.34160901650859	0	0.0414	0.00767777777777778	0	0	0.0583562461155997	0.0159754128440367	0
0.01	1	2	0.001	0.01	5	0.5	5.31444829269584	0	0.00641111111111115	0.0517444444444445	0	0	0.0112803723816913	0.0706966265060242	0
0.05	1	2	0.001	0.01	5	0.5	5.55889480701064	0	0	0.504311111111111	0	0	0	0.525995677167165	0
0.005	-1.5	10	0.001	0.01	5	0.5	6.07494855945299	0	0.126633333333333	7.77777777777322e-05	0	0	0.152890284801704	0.000902301790280801	0
0.01	-1.5	10	0.001	0.01	5	0.5	6.54573443887409	0	0.00887777777777776	0.000344444444444481	0	0	0.0145745928338762	0.00216699029126236	0
0.05	-1.5	10	0.001	0.01	5	0.5	6.18359145470402	0	0.0309555555555555	0.00044444444444447	0	0	0.0449757847533632	0.00260129032258079	0
0.005	-0.5	10	0.001	0.01	5	0.5	5.96630566420197	0	0.00229999999999997	0.0173	0	0	0.00486604477611934	0.0297020439061317	0
0.01	-0.5	10	0.001	0.01	5	0.5	5.1333768006108	0	0.00318888888888891	0.122977777777778	0	0	0.00634142919772034	0.146680830922956	0
0.05	-0.5	10	0.001	0.01	5	0.5	5.93009136578496	0	0.000311111111111151	0.0743777777777778	0	0	0.000973913043478385	0.0949022784810126	0
0.005	1	10	0.001	0.01	5	0.5	1.76544704782911	0.183511111111111	0.849866666666667	0.441644444444444	0.180244444444444	0.184038558478886	0.858751401869159	0.465450557620818	0.180842468480425
0.01	1	10	0.001	0.01	5	0.5	2.59837591142028	0.0245111111111111	0.831344444444444	0.104866666666667	0.0239333333333334	0.0250410810810811	0.845131869116988	0.127390251740761	0.0244618296529969
0.05	1	10	0.001	0.01	5	0.5	3.1778046860924	0.00362222222222222	0.113544444444444	0.456722222222222	0.00345555555555555	0.00378755186721992	0.140298992100245	0.480448051948052	0.00361411113673045
0.005	-1.5	2	0	0.1	5	0.5	6.49141299124858	0	4.44444444444025e-05	0.0419666666666667	0	0	0.00023773584905638	0.059821300659755	0
0.01	-1.5	2	0	0.1	5	0.5	6.68153805793787	0	6.66666666666593e-05	0.0309888888888888	0	0	0.000318315789473649	0.0469177570093457	0
0.05	-1.5	2	0	0.1	5	0.5	6.78112737858464	0	0.000144444444444392	0.0126444444444445	0	0	0.00054966442953	0.0232113314447592	0
0.005	-0.5	2	0	0.1	5	0.5	6.13832358168276	0	0	0.233933333333333	0	0	0	0.25988772961058	0
0.01	-0.5	2	0	0.1	5	0.5	5.98441281341047	0	0	0.493822222222222	0	0	0	0.515767349758232	0
0.05	-0.5	2	0	0.1	5	0.5	6.25602005153803	0	0	0.229577777777778	0	0	0	0.255737917485265	0
0.005	1	2	0	0.1	5	0.5	4.78934096564923	0	0.0291777777777777	0.0581555555555555	0	0	0.0426249275362318	0.0779992903607332	0
0.01	1	2	0	0.1	5	0.5	5.87576991815945	0	0.0107222222222222	0.00529999999999997	0	0	0.0170532959326788	0.0122220640569394	0
0.05	1	2	0	0.1	5	0.5	5.6403769784489	0	0	0.4712	0	0	0	0.494017841460596	0
0.005	-1.5	10	0	0.1	5	0.5	6.02968068643173	0	0.128733333333333	4.44444444444025e-05	0	0	0.15472559618442	0.000669767441859834	0
0.01	-1.5	10	0	0.1	5	0.5	6.16548430549551	0	0.00258888888888886	0.00763333333333338	0	0	0.00537200365965228	0.0158975206611571	0
0.05	-1.5	10	0	0.1	5	0.5	6.12021643247425	0	0.0179777777777778	0.00108888888888892	0	0	0.0269310435931308	0.00415757575757587	0
0.005	-0.5	10	0	0.1	5	0.5	5.87576991815945	0	0.00277777777777777	0.0215	0	0	0.00567056705670565	0.0351945146156622	0
0.01	-0.5	10	0	0.1	5	0.5	5.8667163435552	0	0.00319999999999998	0.0189	0	0	0.00635516637478105	0.0318345339769774	0
0.05	-0.5	10	0	0.1	5	0.5	6.23791290232953	0	0.00138888888888888	0.0104888888888889	0	0	0.003206106870229	0.0202028025477707	0
0.005	1	10	0	0.1	5	0.5	2.75228667969256	0.0144888888888889	0.798522222222222	0.0864555555555555	0.0141777777777777	0.014885979614949	0.831900964630225	0.107898982118294	0.0145729435757987
0.01	1	10	0	0.1	5	0.5	3.00578676861162	0.00664444444444444	0.771922222222222	0.0516222222222222	0.00645555555555555	0.00689211067916762	0.826087128712871	0.0705721518987342	0.00669924502402196
0.05	1	10	0	0.1	5	0.5	4.32760866083239	2.22222222222222e-05	0.110788888888889	0.0495666666666666	2.22222222222568e-05	2.44541484716157e-05	0.137568683274021	0.0684427397260274	2.44541484716538e-05
0.005	-1.5	2	1e-05	0.1	5	0.5	6.46425226743582	0	4.44444444444025e-05	0.0487333333333333	0	0	0.00023773584905638	0.0676007339449541	0
0.01	-1.5	2	1e-05	0.1	5	0.5	6.53668086426984	0	0	0.0680222222222222	0	0	0	0.0882324277952531	0
0.05	-1.5	2	1e-05	0.1	5	0.5	6.80828810239739	0	8.88888888889161e-05	0.0103777777777778	0	0	0.000392982456140471	0.0200142857142858	0
0.005	-0.5	2	1e-05	0.1	5	0.5	6.00251996261898	0	0	0.364877777777778	0	0	0	0.389686440677966	0
0.01	-0.5	2	1e-05	0.1	5	0.5	5.68564485147016	0	0	0.841566666666667	0	0	0	0.851706024096386	0
0.05	-0.5	2	1e-05	0.1	5	0.5	6.36466294678905	0	1.11111111110729e-05	0.146088888888889	0	0	8.78048780484784e-05	0.171097134004648	0
0.005	1	2	1e-05	0.1	5	0.5	4.83460883867049	0	0.0518666666666666	0.0284666666666666	0	0	0.070906329113924	0.0438454329371816	0
0.01	1	2	1e-05	0.1	5	0.5	5.70375200067867	0	0.00687777777777776	0.0161666666666667	0	0	0.0119256880733945	0.0281266385588347	0
0.05	1	2	1e-05	0.1	5	0.5	5.73996629909567	0	0	0.356022222222222	0	0	0	0.380786795567083	0
0.005	-1.5	10	1e-05	0.1	5	0.5	6.21980575312102	0	0.172211111111111	0	0	0	0.19726	0	0
0.01	-1.5	10	1e-05	0.1	5	0.5	5.8848234927637	0	0.00523333333333331	0.0110333333333333	0	0	0.0095488334674175	0.0209929530201342	0
0.05	-1.5	10	1e-05	0.1	5	0.5	6.3737165213933	0	0.0383222222222223	9.9999999999989e-05	0	0	0.0544749608273269	0.00101704035874428	0
0.005	-0.5	10	1e-05	0.1	5	0.5	5.81239489592969	0	0.00267777777777778	0.0245222222222222	0	0	0.00552360163710778	0.0389198040587824	0
0.01	-0.5	10	1e-05	0.1	5	0.5	5.56794838161489	0	0.000922222222222269	0.0900666666666666	0	0	0.00222747603833877	0.111715176374077	0
0.05	-0.5	10	1e-05	0.1	5	0.5	6.24696647693378	0	0.00116666666666665	0.0118666666666667	0	0	0.00274623767514267	0.0221784919653894	0
0.005	1	10	1e-05	0.1	5	0.5	2.74323310508831	0.0153111111111111	0.7329	0.115222222222222	0.0148444444444444	0.0157093870165121	0.806705751031303	0.138596658711217	0.0152374745417515
0.01	1	10	1e-05	0.1	5	0.5	2.72512595587981	0.0162	0.766688888888889	0.102266666666667	0.0158444444444444	0.0166101265822785	0.824685985297605	0.124498550724638	0.0162529172320217
0.05	1	10	1e-05	0.1	5	0.5	4.24612648939412	0	0.0853777777777778	0.0804111111111111	0	0	0.110776201372998	0.101275735702388	0
0.005	-1.5	2	1e-04	0.1	5	0.5	6.42803796901882	0	3.33333333333297e-05	0.0600666666666667	0	0	0.000196108949416321	0.0800183259911895	0
0.01	-1.5	2	1e-04	0.1	5	0.5	6.80828810239739	0	6.66666666666593e-05	0.0141333333333333	0	0	0.000318315789473649	0.0254500992457324	0
0.05	-1.5	2	1e-04	0.1	5	0.5	6.90787742304416	0	0.000133333333333319	0.00484444444444443	0	0	0.000519587628865922	0.0114989010989011	0
0.005	-0.5	2	1e-04	0.1	5	0.5	5.89387706736796	0	0	0.488833333333333	0	0	0	0.511145228215768	0
0.01	-0.5	2	1e-04	0.1	5	0.5	6.02062711182748	0	0	0.455188888888889	0	0	0	0.479057262180974	0
0.05	-0.5	2	1e-04	0.1	5	0.5	6.51857371506133	0	0	0.0746111111111111	0	0	0	0.0951197301854974	0
0.005	1	2	1e-04	0.1	5	0.5	4.53584087673018	0	0.0329222222222222	0.0951	0	0	0.0475135857461024	0.117062035278155	0
0.01	1	2	1e-04	0.1	5	0.5	4.69880521960671	0	0.00325555555555557	0.268844444444444	0	0	0.00645419580419583	0.294417769193626	0
0.05	1	2	1e-04	0.1	5	0.5	5.6222698292404	0	2.22222222222568e-05	0.269711111111111	0	0	0.000147584187408721	0.295153100120627	0
0.005	-1.5	10	1e-04	0.1	5	0.5	5.98441281341047	0	0.103722222222222	7.77777777777322e-05	0	0	0.130871766342142	0.000902301790280801	0
0.01	-1.5	10	1e-04	0.1	5	0.5	6.29223434995504	0	0.00558888888888887	0.00288888888888894	0	0	0.0100920382165605	0.00790826795413412	0
0.05	-1.5	10	1e-04	0.1	5	0.5	5.96630566420197	0	0.0218888888888888	0.00186666666666668	0	0	0.0325427728613569	0.00584751381215475	0
0.005	-0.5	10	1e-04	0.1	5	0.5	5.94819851499347	0	0.00185555555555561	0.0213	0	0	0.00409776046738084	0.0349554269175108	0
0.01	-0.5	10	1e-04	0.1	5	0.5	5.53173408319788	0	0.00113333333333332	0.0875111111111111	0	0	0.00267332293291728	0.108960263446762	0
0.05	-0.5	10	1e-04	0.1	5	0.5	6.20169860391252	0	0.00111111111111106	0.0133888888888889	0	0	0.00262910798122054	0.0243512429831596	0
0.005	1	10	1e-04	0.1	5	0.5	2.15475075581194	0.0772222222222222	0.763833333333333	0.312688888888889	0.0757555555555556	0.0777708703374778	0.822589743589744	0.337784424863063	0.0763276765881831
0.01	1	10	1e-04	0.1	5	0.5	3.50373337184547	9e-04	0.711977777777778	0.0158333333333334	0.000888888888888939	0.000955841723249824	0.790813516160627	0.0277511591962906	0.000943820224719154
0.05	1	10	1e-04	0.1	5	0.5	2.86092957494359	0.0109111111111111	0.157533333333333	0.564077777777778	0.0106000000000001	0.0112458077709611	0.182899897645855	0.583901597444089	0.0109326057298773
0.005	-1.5	2	0.001	0.1	5	0.5	6.66343090872936	0	7.77777777777322e-05	0.0150777777777777	0	0	0.000355287009063236	0.0267472819710598	0
0.01	-1.5	2	0.001	0.1	5	0.5	6.98030601987818	0	0.000111111111111062	0.00429999999999997	0	0	0.000457765667574729	0.0105431351351351	0
0.05	-1.5	2	0.001	0.1	5	0.5	6.87166312462716	0	0.000122222222222246	0.00661111111111112	0	0	0.000488028169014179	0.0143277591973244	0
0.005	-0.5	2	0.001	0.1	5	0.5	5.93914494038922	0	0	0.434755555555556	0	0	0	0.459043575418994	0
0.01	-0.5	2	0.001	0.1	5	0.5	5.8848234927637	0	0	0.621022222222222	0	0	0	0.639781240063593	0
0.05	-0.5	2	0.001	0.1	5	0.5	6.46425226743582	0	0	0.0947444444444444	0	0	0	0.116814569176407	0
0.005	1	2	0.001	0.1	5	0.5	5.85766276895095	0	0.0892555555555555	0.000199999999999978	0	0	0.114854808510638	0.0015376271186439	0
0.01	1	2	0.001	0.1	5	0.5	5.59510910542765	0	0.0133888888888889	0.0111444444444444	0	0	0.0206501190071404	0.021124613455913	0
0.05	1	2	0.001	0.1	5	0.5	6.20169860391252	0	0.000111111111111062	0.0533666666666667	0	0	0.000457765667574729	0.0726286228622862	0
0.005	-1.5	10	0.001	0.1	5	0.5	5.51362693398938	0	0.0688111111111112	0.00201111111111107	0	0	0.0908931857891672	0.00611830985915482	0
0.01	-1.5	10	0.001	0.1	5	0.5	6.59100231189535	0	0.00995555555555561	0.000266666666666637	0	0	0.0159626723223755	0.00184390243902419	0
0.05	-1.5	10	0.001	0.1	5	0.5	6.31939507376779	0	0.0333555555555556	0.000233333333333308	0	0	0.0480472530962211	0.00170160771704161	0
0.005	-0.5	10	0.001	0.1	5	0.5	5.54078765780213	0	0.00170000000000003	0.0688111111111112	0	0	0.00382879841112222	0.0889648332858364	0
0.01	-0.5	10	0.001	0.1	5	0.5	5.71280557528292	0	0.00168888888888885	0.0477	0	0	0.003809448035803	0.0663703067484662	0
0.05	-0.5	10	0.001	0.1	5	0.5	5.93914494038922	0	0.000388888888888883	0.0600222222222222	0	0	0.00113222079589215	0.0799826086956521	0
0.005	1	10	0.001	0.1	5	0.5	2.2000186288332	0.0697222222222222	0.790433333333333	0.267611111111111	0.0680777777777778	0.0703112494441974	0.83033941639648	0.293137889398696	0.0686987319243604
0.01	1	10	0.001	0.1	5	0.5	3.29550115594767	0.002	0.702433333333333	0.0318777777777778	0.00197777777777774	0.0021058495821727	0.783051757188499	0.048023115244105	0.00208245125348186
0.05	1	10	0.001	0.1	5	0.5	4.30950151162388	1.11111111111111e-05	0.125788888888889	0.0433888888888889	1.11111111110729e-05	1.23287671232877e-05	0.151992115077251	0.0615807259073843	1.23257520175658e-05
0.005	-1.5	2	0.01	0.1	5	0.5	6.79923452779314	0	0.000211111111111162	0.00600000000000001	0	0	0.000728767123287846	0.0133477194703286	0
0.01	-1.5	2	0.01	0.1	5	0.5	6.88977027383566	0	0.000122222222222246	0.00819999999999999	0	0	0.000488028169014179	0.016845652173913	0
0.05	-1.5	2	0.01	0.1	5	0.5	6.8626095500229	0	9.9999999999989e-05	0.0069555555555556	0	0	0.00042832861189797	0.0148542372881357	0
0.005	-0.5	2	0.01	0.1	5	0.5	6.57289516268685	0	7.77777777777322e-05	0.0323444444444444	0	0	0.000355287009063236	0.0484846001321876	0
0.01	-0.5	2	0.01	0.1	5	0.5	6.22885932772527	0	0	0.2355	0	0	0	0.261244314013206	0
0.05	-0.5	2	0.01	0.1	5	0.5	6.49141299124858	0	0	0.0836888888888889	0	0	0	0.105039513004981	0
0.005	1	2	0.01	0.1	5	0.5	5.44119833715536	0	0.0426555555555556	0.00502222222222226	0	0	0.0598841225626741	0.0117669421487604	0
0.01	1	2	0.01	0.1	5	0.5	5.65848412765741	0	0.0132333333333333	0.00998888888888894	0	0	0.0204519250425894	0.0194295025728989	0
0.05	1	2	0.01	0.1	5	0.5	6.08400213405725	0	3.33333333333297e-05	0.0950666666666666	0	0	0.000196108949416321	0.117062035278155	0
0.005	-1.5	10	0.01	0.1	5	0.5	5.79428774672119	0	0.0972	0.000288888888888894	0	0	0.12384808988764	0.00192705882352945	0
0.01	-1.5	10	0.01	0.1	5	0.5	6.45519869283157	0	0.00644444444444447	0.00121111111111116	0	0	0.0113346258239628	0.00438086124401933	0
0.05	-1.5	10	0.01	0.1	5	0.5	5.74901987369993	0	0.0292666666666667	0.0023333333333333	0	0	0.0427410173857051	0.00673282442748082	0
0.005	-0.5	10	0.01	0.1	5	0.5	5.70375200067867	0	0.0013333333333333	0.0476111111111112	0	0	0.00309360613810733	0.0662872928176796	0
0.01	-0.5	10	0.01	0.1	5	0.5	5.64943055305316	0	0.00123333333333331	0.0593222222222223	0	0	0.00289116279069762	0.079295406360424	0
0.05	-0.5	10	0.01	0.1	5	0.5	5.93009136578496	0	0.000333333333333297	0.0754111111111111	0	0	0.00101612903225795	0.0959777777777778	0
0.005	1	10	0.01	0.1	5	0.5	3.09632251465413	0.00444444444444444	0.821866666666667	0.0300777777777778	0.0042444444444445	0.00463448275862069	0.838315088823926	0.0458597647058823	0.00442694872384462
0.01	1	10	0.01	0.1	5	0.5	3.14159038767539	0.00407777777777778	0.707188888888889	0.0473666666666667	0.00386666666666668	0.00425703107019563	0.786999214916585	0.066088957243925	0.00403849873359431
0.05	1	10	0.01	0.1	5	0.5	4.10126929572609	5.55555555555556e-05	0.136511111111111	0.0686888888888889	5.55555555555864e-05	6.05042016806723e-05	0.162182922996333	0.0888684540787222	6.04751619870747e-05
0.005	-1.5	2	0	0.5	5	0.5	6.69964520714637	0	0.000144444444444392	0.0122888888888889	0	0	0.00054966442953	0.022752	0
0.01	-1.5	2	0	0.5	5	0.5	6.62721661031236	0	2.22222222222568e-05	0.0425888888888889	0	0	0.000147584187408721	0.0606350282485876	0
0.05	-1.5	2	0	0.5	5	0.5	6.66343090872936	0	1.11111111110729e-05	0.0231111111111111	0	0	8.78048780484784e-05	0.0372140575079872	0
0.005	-0.5	2	0	0.5	5	0.5	5.89387706736796	0	0	0.424133333333333	0	0	0	0.448349755301794	0
0.01	-0.5	2	0	0.5	5	0.5	5.55889480701064	0	0	0.956622222222222	0	0	0	0.961071627906977	0
0.05	-0.5	2	0	0.5	5	0.5	5.94819851499347	0	0	0.559744444444444	0	0	0	0.579680547945205	0
0.005	1	2	0	0.5	5	0.5	4.23707291478987	1.11111111111111e-05	0.0225222222222222	0.232277777777778	1.11111111110729e-05	1.23287671232877e-05	0.0334624303963315	0.258491658488714	1.23257520175658e-05
0.01	1	2	0	0.5	5	0.5	4.97041245773427	0	0.00546666666666662	0.130577777777778	0	0	0.00990287539936094	0.154863058823529	0
0.05	1	2	0	0.5	5	0.5	5.31444829269584	0	0	0.739522222222222	0	0	0	0.753137135159407	0
0.005	-1.5	10	0	0.5	5	0.5	5.6403769784489	0	0.111988888888889	0.000566666666666715	0	0	0.138754875717017	0.00300631578947394	0
0.01	-1.5	10	0	0.5	5	0.5	6.17453788009976	0	0.005	0.00405555555555559	0	0	0.00921951219512196	0.0101355371900827	0
0.05	-1.5	10	0	0.5	5	0.5	6.36466294678905	0	0.0364333333333333	7.77777777777322e-05	0	0	0.0520837062716672	0.000902301790280801	0
0.005	-0.5	10	0	0.5	5	0.5	5.8848234927637	0	0.00445555555555555	0.0148777777777778	0	0	0.00840349272349271	0.0264649411764706	0
0.01	-0.5	10	0	0.5	5	0.5	5.8848234927637	0	0.0028111111111111	0.0204222222222222	0	0	0.00572830188679242	0.0337714910681735	0
0.05	-0.5	10	0	0.5	5	0.5	5.93009136578496	0	0.000288888888888894	0.0649888888888889	0	0	0.000922816901408467	0.0853214574898786	0
0.005	1	10	0	0.5	5	0.5	2.9152510225691	0.00853333333333333	0.749477777777778	0.0700222222222222	0.0083333333333333	0.00883121149897331	0.815293406856869	0.0902588235294117	0.00862422997946609
0.01	1	10	0	0.5	5	0.5	2.10948288279068	0.0868888888888889	0.859955555555556	0.252233333333333	0.0848777777777778	0.0874091816367265	0.865611892611493	0.277836425449247	0.0854239183492346
0.05	1	10	0	0.5	5	0.5	4.72596594341947	0	0.120233333333333	0.0132777777777778	0	0	0.146804414535666	0.0242073954983924	0
0.005	-1.5	2	1e-05	0.5	5	0.5	6.57289516268685	0	4.44444444444025e-05	0.0267222222222222	0	0	0.00023773584905638	0.0415679012345679	0
0.01	-1.5	2	1e-05	0.5	5	0.5	6.53668086426984	0	2.22222222222568e-05	0.0630111111111111	0	0	0.000147584187408721	0.083353280839895	0
0.05	-1.5	2	1e-05	0.5	5	0.5	6.83544882621015	0	0.000122222222222246	0.00858888888888887	0	0	0.000488028169014179	0.0174080428954423	0
0.005	-0.5	2	1e-05	0.5	5	0.5	5.98441281341047	0	0	0.386766666666667	0	0	0	0.411728138934522	0
0.01	-0.5	2	1e-05	0.5	5	0.5	5.98441281341047	0	0	0.493666666666667	0	0	0	0.51572362966375	0
0.05	-0.5	2	1e-05	0.5	5	0.5	6.00251996261898	0	0	0.4918	0	0	0	0.514010322580645	0
0.005	1	2	1e-05	0.5	5	0.5	4.74407309262797	0	0.0267666666666667	0.0666	0	0	0.0393178756476685	0.0868845556514236	0
0.01	1	2	1e-05	0.5	5	0.5	4.80744811485773	0	0.0037666666666667	0.223955555555556	0	0	0.00727976139752882	0.249966141732283	0
0.05	1	2	1e-05	0.5	5	0.5	4.94325173392151	0	0	0.914611111111111	0	0	0	0.921518436250555	0
0.005	-1.5	10	1e-05	0.5	5	0.5	6.04778783564024	0	0.119066666666667	0	0	0	0.145615098409275	0	0
0.01	-1.5	10	1e-05	0.5	5	0.5	6.17453788009976	0	0.00329999999999997	0.00674444444444444	0	0	0.00651100478468894	0.0145403041825095	0
0.05	-1.5	10	1e-05	0.5	5	0.5	6.30128792455929	0	0.0306444444444445	0.000155555555555575	0	0	0.044595187680462	0.00133889943074021	0
0.005	-0.5	10	1e-05	0.5	5	0.5	5.91198421657646	0	0.00275555555555551	0.0165999999999999	0	0	0.00563788903924213	0.0287505154639174	0
0.01	-0.5	10	1e-05	0.5	5	0.5	5.57700195621914	0	0.00125555555555557	0.0753777777777778	0	0	0.00293718411552349	0.095962278978389	0
0.05	-0.5	10	1e-05	0.5	5	0.5	5.83955561974244	0	0.000233333333333308	0.106911111111111	0	0	0.000783999999999914	0.129630793905373	0
0.005	1	10	1e-05	0.5	5	0.5	3.65764414011775	0.000322222222222222	0.720488888888889	0.00890000000000002	0.000322222222222224	0.000345531914893617	0.797301195413516	0.0179185086551265	0.000345287030474842
0.01	1	10	1e-05	0.5	5	0.5	2.96957247019461	0.00713333333333333	0.796744444444444	0.0497222222222222	0.00696666666666668	0.00739753086419753	0.831837353549276	0.0686157590508062	0.00722799634034768
0.05	1	10	1e-05	0.5	5	0.5	4.39098368306215	2.22222222222222e-05	0.118144444444444	0.0372888888888889	2.22222222222568e-05	2.44541484716157e-05	0.144643238866397	0.0544216216216217	2.44541484716538e-05
0.005	-1.5	2	1e-04	0.5	5	0.5	6.36466294678905	0	4.44444444444025e-05	0.0812222222222222	0	0	0.00023773584905638	0.102169717138103	0
0.01	-1.5	2	1e-04	0.5	5	0.5	6.60910946110385	0	3.33333333333297e-05	0.0475666666666666	0	0	0.000196108949416321	0.0662660933660933	0
0.05	-1.5	2	1e-04	0.5	5	0.5	6.6181630357081	0	7.77777777777322e-05	0.0285333333333333	0	0	0.000355287009063236	0.0438885045778229	0
0.005	-0.5	2	1e-04	0.5	5	0.5	5.6041626800319	0	0	0.8429	0	0	0	0.852865134954272	0
0.01	-0.5	2	1e-04	0.5	5	0.5	5.41403761334261	0	0	0.999566666666667	0	0	0	0.999955555555556	0
0.05	-0.5	2	1e-04	0.5	5	0.5	6.24696647693378	0	0	0.234577777777778	0	0	0	0.260373281135307	0
0.005	1	2	1e-04	0.5	5	0.5	4.89798386090025	0	0.0318888888888889	0.0400888888888888	0	0	0.046125	0.0576547875713379	0
0.01	1	2	1e-04	0.5	5	0.5	5.19675182284056	0	0.00723333333333331	0.0611111111111111	0	0	0.0124	0.0812664907651715	0
0.05	1	2	1e-04	0.5	5	0.5	6.00251996261898	0	4.44444444444025e-05	0.138544444444444	0	0	0.00023773584905638	0.163145794392523	0
0.005	-1.5	10	1e-04	0.5	5	0.5	6.13832358168276	0	0.145544444444444	1.11111111110729e-05	0	0	0.17085652173913	0.000359999999998761	0
0.01	-1.5	10	1e-04	0.5	5	0.5	6.40087724520606	0	0.00518888888888891	0.00177777777777777	0	0	0.00947536231884062	0.0056391608391608	0
0.05	-1.5	10	1e-04	0.5	5	0.5	6.34655579758055	0	0.0360111111111111	9.9999999999989e-05	0	0	0.0515450930893026	0.00101704035874428	0
0.005	-0.5	10	1e-04	0.5	5	0.5	5.44119833715536	0	0.000911111111111085	0.115455555555556	0	0	0.00220415999999994	0.138793640699523	0
0.01	-0.5	10	1e-04	0.5	5	0.5	5.76712702290843	0	0.0018111111111111	0.0361222222222222	0	0	0.00402508574228316	0.0530775510204081	0
0.05	-0.5	10	1e-04	0.5	5	0.5	6.10210928326575	0	0.000855555555555609	0.0249333333333334	0	0	0.00208645161290336	0.0394205646566748	0
0.005	1	10	1e-04	0.5	5	0.5	1.7111256002036	0.204088888888889	0.876033333333333	0.442911111111111	0.200688888888889	0.204585016574586	0.878551227061685	0.466677073170732	0.201221220159151
0.01	1	10	1e-04	0.5	5	0.5	2.9152510225691	0.0087	0.827588888888889	0.0501555555555555	0.00847777777777781	0.00899753761969904	0.841880062794349	0.0690247572815533	0.00876971493728623
0.05	1	10	1e-04	0.5	5	0.5	4.1736978925601	2.22222222222222e-05	0.111955555555556	0.0719555555555556	1.11111111110729e-05	2.44541484716157e-05	0.138751475409836	0.0921226079593565	1.23257520175658e-05
0.005	-1.5	2	0.001	0.5	5	0.5	6.31939507376779	0	1.11111111110729e-05	0.100255555555556	0	0	8.78048780484784e-05	0.122378686759957	0
0.01	-1.5	2	0.001	0.5	5	0.5	6.54573443887409	0	0	0.0649555555555555	0	0	0	0.0853035321366531	0
0.05	-1.5	2	0.001	0.5	5	0.5	6.72680593095913	0	8.88888888889161e-05	0.0156888888888889	0	0	0.000392982456140471	0.0275725687717938	0
0.005	-0.5	2	0.001	0.5	5	0.5	6.15643073089126	0	1.11111111110729e-05	0.2186	0	0	8.78048780484784e-05	0.244771562577141	0
0.01	-0.5	2	0.001	0.5	5	0.5	6.17453788009976	0	1.11111111110729e-05	0.287211111111111	0	0	8.78048780484784e-05	0.312944895508047	0
0.05	-0.5	2	0.001	0.5	5	0.5	6.44614511822732	0	0	0.104966666666667	0	0	0	0.127477590361446	0
0.005	1	2	0.001	0.5	5	0.5	5.41403761334261	0	0.0460666666666667	0.00486666666666669	0	0	0.0640583690987125	0.0115335423197493	0
0.01	1	2	0.001	0.5	5	0.5	5.00662675615127	0	0.00341111111111114	0.156577777777778	0	0	0.00670398613518204	0.181553374233129	0
0.05	1	2	0.001	0.5	5	0.5	5.94819851499347	0	5.55555555555864e-05	0.145388888888889	0	0	0.000276013143483176	0.170409302325581	0
0.005	-1.5	10	0.001	0.5	5	0.5	5.8848234927637	0	0.157544444444444	6.66666666666593e-05	0	0	0.182899897645855	0.000833057851239578	0
0.01	-1.5	10	0.001	0.5	5	0.5	6.39182367060181	0	0.00494444444444442	0.00196666666666667	0	0	0.00914309009376269	0.00606032608695654	0
0.05	-1.5	10	0.001	0.5	5	0.5	5.74901987369993	0	0.0262444444444444	0.00309999999999999	0	0	0.038638364167478	0.00833033175355448	0
0.005	-0.5	10	0.001	0.5	5	0.5	6.02062711182748	0	0.00293333333333334	0.0118333333333334	0	0	0.0059162294353046	0.0221344329896908	0
0.01	-0.5	10	0.001	0.5	5	0.5	5.68564485147016	0	0.00162222222222219	0.0504333333333333	0	0	0.00368657314629252	0.0693534545454546	0
0.05	-0.5	10	0.001	0.5	5	0.5	6.13832358168276	0	0.00115555555555558	0.0190666666666667	0	0	0.00272290909090914	0.0320201406886339	0
0.005	1	10	0.001	0.5	5	0.5	2.22717935264596	0.0673444444444444	0.807466666666667	0.245355555555556	0.0659555555555555	0.0679435943060498	0.833082352941176	0.271116394640682	0.0665867794346762
0.01	1	10	0.001	0.5	5	0.5	2.79755455271382	0.0130111111111111	0.863622222222222	0.0569555555555555	0.0125888888888889	0.0133828571428571	0.868347440726789	0.0766618397626112	0.01295444646098
0.05	1	10	0.001	0.5	5	0.5	4.6263766227727	0	0.0885333333333334	0.0299	0	0	0.114119693094629	0.0456347240915209	0
0.005	-1.5	2	0.01	0.5	5	0.5	6.55478801347834	0	5.55555555555864e-05	0.0298111111111111	0	0	0.000276013143483176	0.0455603773584906	0
0.01	-1.5	2	0.01	0.5	5	0.5	6.80828810239739	0	5.55555555555864e-05	0.0142888888888889	0	0	0.000276013143483176	0.0256386075949367	0
0.05	-1.5	2	0.01	0.5	5	0.5	6.87166312462716	0	0.000133333333333319	0.00587777777777776	0	0	0.000519587628865922	0.0131792387543252	0
0.005	-0.5	2	0.01	0.5	5	0.5	5.96630566420197	0	0	0.361922222222222	0	0	0	0.386768056537103	0
0.01	-0.5	2	0.01	0.5	5	0.5	6.07494855945299	0	0	0.391211111111111	0	0	0	0.41610429073857	0
0.05	-0.5	2	0.01	0.5	5	0.5	6.53668086426984	0	1.11111111110729e-05	0.0669777777777778	0	0	8.78048780484784e-05	0.0872769893708705	0
0.005	1	2	0.01	0.5	5	0.5	5.35066259111284	0	0.0496111111111112	0.00606666666666666	0	0	0.0683267981790592	0.0134696035242291	0
0.01	1	2	0.01	0.5	5	0.5	5.45025191175962	0	0.0111666666666667	0.0228222222222222	0	0	0.0176610878661088	0.0368535421858312	0
0.05	1	2	0.01	0.5	5	0.5	5.95725208959772	0	5.55555555555864e-05	0.137755555555556	0	0	0.000276013143483176	0.162301090909091	0
0.005	-1.5	10	0.01	0.5	5	0.5	5.83955561974244	0	0.108988888888889	0.000211111111111162	0	0	0.135891588785047	0.00159866444073494	0
0.01	-1.5	10	0.01	0.5	5	0.5	6.20169860391252	0	0.0028555555555555	0.00583333333333336	0	0	0.0058058269834154	0.0131184928111057	0
0.05	-1.5	10	0.01	0.5	5	0.5	5.65848412765741	0	0.0129444444444444	0.00964444444444446	0	0	0.0200807113543091	0.0189875	0
0.005	-0.5	10	0.01	0.5	5	0.5	5.83955561974244	0	0.00197777777777774	0.0262777777777777	0	0	0.00430686509841567	0.0410737422467263	0
0.01	-0.5	10	0.01	0.5	5	0.5	5.90293064197221	0	0.003	0.0159	0	0	0.00601325673884225	0.0278142691862708	0
0.05	-0.5	10	0.01	0.5	5	0.5	6.15643073089126	0	0.000700000000000034	0.0219888888888888	0	0	0.0017552238805971	0.0357624955181068	0
0.005	1	10	0.01	0.5	5	0.5	3.22307255911366	0.00281111111111111	0.756722222222222	0.0309333333333334	0.00270000000000004	0.00295098356861838	0.81979746835443	0.0468649298597195	0.0028343439018746
0.01	1	10	0.01	0.5	5	0.5	2.77039382890107	0.0144666666666667	0.809477777777778	0.0793666666666667	0.0140111111111111	0.0148665156320797	0.833361597821153	0.10019682716393	0.0144048957388939
0.05	1	10	0.01	0.5	5	0.5	3.05105464163287	0.00483333333333333	0.122244444444444	0.513433333333333	0.00466666666666671	0.00503074804956402	0.14863339587242	0.534895176848875	0.00485838879963282
0.005	-1.5	2	0.1	0.5	5	0.5	5.8848234927637	0	0	0.346688888888889	0	0	0	0.37132958677686	0
0.01	-1.5	2	0.1	0.5	5	0.5	6.46425226743582	0	0	0.0956666666666667	0	0	0	0.117631878557875	0
0.05	-1.5	2	0.1	0.5	5	0.5	6.55478801347834	0	2.22222222222568e-05	0.0437	0	0	0.000147584187408721	0.0619641137855579	0
0.005	-0.5	2	0.1	0.5	5	0.5	5.35066259111284	0	0	0.998055555555556	0	0	0	0.998936451897617	0
0.01	-0.5	2	0.1	0.5	5	0.5	5.40498403873836	0	0	0.989	0	0	0	0.991623342175066	0
0.05	-0.5	2	0.1	0.5	5	0.5	6.19264502930827	0	0	0.280522222222222	0	0	0	0.306097859032956	0
0.005	1	2	0.1	0.5	5	0.5	3.4222512004072	0.00146666666666667	0.0263888888888889	0.664833333333333	0.00137777777777781	0.00154788273615635	0.0388258190074603	0.681972862957938	0.00145441005352575
0.01	1	2	0.1	0.5	5	0.5	4.70785879421096	0	0.0044777777777778	0.248333333333333	0	0	0.00843138231631387	0.273939688715953	0
0.05	1	2	0.1	0.5	5	0.5	5.12432322600655	0	0	0.845	0	0	0	0.854608695652174	0
0.005	-1.5	10	0.1	0.5	5	0.5	5.59510910542765	0	0.107966666666667	0.000499999999999945	0	0	0.134890443404021	0.00280346106304048	0
0.01	-1.5	10	0.1	0.5	5	0.5	5.25107327046607	0	0.00572222222222218	0.0659777777777778	0	0	0.0102959143197143	0.0862464553314121	0
0.05	-1.5	10	0.1	0.5	5	0.5	5.99346638801473	0	0.0249	0.00126666666666664	0	0	0.0368263449625041	0.00450989010989001	0
0.005	-0.5	10	0.1	0.5	5	0.5	5.69469842607442	0	0.00348888888888887	0.028	0	0	0.0068213793103448	0.0433031026252984	0
0.01	-0.5	10	0.1	0.5	5	0.5	5.3597161657171	0	0.00165555555555552	0.110566666666667	0	0	0.00374543640897748	0.133492254458344	0
0.05	-0.5	10	0.1	0.5	5	0.5	5.30539471809159	0	5.55555555555864e-05	0.399	0	0	0.000276013143483176	0.423855737704918	0
0.005	1	10	0.1	0.5	5	0.5	1.54816125732707	0.274788888888889	0.864544444444444	0.558466666666667	0.270433333333333	0.275274381625442	0.868565581395349	0.57862147099132	0.270911130742049
0.01	1	10	0.1	0.5	5	0.5	1.87408994308013	0.146566666666667	0.923655555555556	0.294233333333333	0.143766666666667	0.147118034963488	0.924062990736656	0.319545894182428	0.144403365810452
0.05	1	10	0.1	0.5	5	0.5	3.14159038767539	0.00353333333333333	0.0864777777777778	0.552588888888889	0.00344444444444447	0.00369630996309963	0.111851497005988	0.573186187971644	0.00360332103321036
0.005	-1.5	2	0	1e-05	10	1	6.70869878175062	0	0.000155555555555575	0.0113111111111112	0	0	0.000578835110746587	0.0213690962099126	0
0.01	-1.5	2	0	1e-05	10	1	7.12516321354621	0	0.000222222222222235	0.00134444444444448	0	0	0.000754491017964114	0.00473478260869578	0
0.05	-1.5	2	0	1e-05	10	1	6.72680593095913	0	6.66666666666593e-05	0.0168222222222222	0	0	0.000318315789473649	0.0290687999999999	0
0.005	-0.5	2	0	1e-05	10	1	6.16548430549551	0	0	0.2143	0	0	0	0.240669670710572	0
0.01	-0.5	2	0	1e-05	10	1	6.3556093721848	0	0	0.145944444444444	0	0	0	0.170972107438016	0
0.05	-0.5	2	0	1e-05	10	1	6.31939507376779	0	0	0.175011111111111	0	0	0	0.200720707964602	0
0.005	1	2	0	1e-05	10	1	5.48646621017662	0	0.0648666666666666	0.0024777777777778	0	0	0.0860336842105263	0.00702011242973148	0
0.01	1	2	0	1e-05	10	1	5.21485897204907	0	0.0128111111111111	0.0397777777777778	0	0	0.0199079136690647	0.057344	0
0.05	1	2	0	1e-05	10	1	5.75807344830418	0	0	0.2954	0	0	0	0.320635175879397	0
0.005	-1.5	10	0	1e-05	10	1	6.00251996261898	0	0.107811111111111	8.88888888889161e-05	0	0	0.134756461835216	0.000955450236967117	0
0.01	-1.5	10	0	1e-05	10	1	6.17453788009976	0	0.00241111111111114	0.00895555555555561	0	0	0.00505864939870497	0.0179745132743364	0
0.05	-1.5	10	0	1e-05	10	1	6.00251996261898	0	0.0149111111111111	0.00223333333333331	0	0	0.0226361445783132	0.00655689320388343	0
0.005	-0.5	10	0	1e-05	10	1	5.93914494038922	0	0.00218888888888891	0.0185777777777778	0	0	0.00467457627118648	0.031420134228188	0
0.01	-0.5	10	0	1e-05	10	1	5.26918041967458	0	0.000911111111111085	0.161066666666667	0	0	0.00220415999999994	0.186117982679572	0
0.05	-0.5	10	0	1e-05	10	1	5.76712702290843	0	0.000188888888888905	0.140166666666667	0	0	0.000671473354232033	0.164842105263158	0
0.005	1	10	0	1e-05	10	1	2.55310803839902	0.0277111111111111	0.792333333333333	0.138844444444444	0.0270222222222222	0.0282593525179856	0.83107572815534	0.16345663119647	0.0275630312570272
0.01	1	10	0	1e-05	10	1	2.48973301616926	0.0332666666666667	0.845377777777778	0.127077777777778	0.0324666666666666	0.0338259583053127	0.856136101808439	0.151094311926605	0.0330347240915208
0.05	1	10	0	1e-05	10	1	4.39098368306215	2.22222222222222e-05	0.0893444444444444	0.0561888888888888	2.22222222222568e-05	2.44541484716157e-05	0.114936585365854	0.0757873327386262	2.44541484716538e-05
0.005	-1.5	2	0	1e-04	10	1	6.79923452779314	0	0.000177777777777832	0.0061444444444444	0	0	0.000638479809976443	0.0135560311284046	0
0.01	-1.5	2	0	1e-04	10	1	6.93503814685692	0	0.000155555555555575	0.00602222222222226	0	0	0.000578835110746587	0.0133905882352942	0
0.05	-1.5	2	0	1e-04	10	1	6.83544882621015	0	0.000111111111111062	0.00797777777777775	0	0	0.000457765667574729	0.0164562073669849	0
0.005	-0.5	2	0	1e-04	10	1	6.3556093721848	0	3.33333333333297e-05	0.0963555555555555	0	0	0.000196108949416321	0.118286549391069	0
0.01	-0.5	2	0	1e-04	10	1	5.90293064197221	0	0	0.601877777777778	0	0	0	0.621469974960164	0
0.05	-0.5	2	0	1e-04	10	1	6.29223434995504	0	0	0.196533333333333	0	0	0	0.223036077057793	0
0.005	1	2	0	1e-04	10	1	5.93009136578496	0	0.0986	0.000144444444444392	0	0	0.125420527201346	0.00127223300970827	0
0.01	1	2	0	1e-04	10	1	5.25107327046607	0	0.00821111111111106	0.0508444444444445	0	0	0.0136882028665931	0.0697400665255519	0
0.05	1	2	0	1e-04	10	1	6.12021643247425	0	0.000122222222222246	0.0665333333333333	0	0	0.000488028169014179	0.0868225546605293	0
0.005	-1.5	10	0	1e-04	10	1	5.99346638801473	0	0.1083	0.000122222222222246	0	0	0.135181287837094	0.00116962025316478	0
0.01	-1.5	10	0	1e-04	10	1	6.24696647693378	0	0.00291111111111109	0.00536666666666663	0	0	0.00588449197860958	0.0123256708860759	0
0.05	-1.5	10	0	1e-04	10	1	6.25602005153803	0	0.0266	0.000322222222222224	0	0	0.03909837977965	0.00208205128205129	0
0.005	-0.5	10	0	1e-04	10	1	5.54078765780213	0	0.00182222222222217	0.0648444444444445	0	0	0.00404581497797345	0.0851822762814944	0
0.01	-0.5	10	0	1e-04	10	1	5.61321625463615	0	0.00207777777777773	0.0546777777777778	0	0	0.00447733966745834	0.0740574499850702	0
0.05	-0.5	10	0	1e-04	10	1	5.93009136578496	0	0.000633333333333375	0.0511333333333334	0	0	0.00161665728756341	0.0700515856236787	0
0.005	1	10	0	1e-04	10	1	2.69796523206705	0.0178777777777778	0.825333333333333	0.0860444444444445	0.0175222222222222	0.0183138211382114	0.840528064660979	0.10752	0.0179577044735653
0.01	1	10	0	1e-04	10	1	2.35392939710548	0.0476555555555556	0.771366666666667	0.217777777777778	0.0466111111111112	0.0482620227729404	0.826087128712871	0.243971350950852	0.0472359249329759
0.05	1	10	0	1e-04	10	1	4.68069807039821	2.22222222222222e-05	0.103833333333333	0.0192555555555556	2.22222222222568e-05	2.44541484716157e-05	0.13097552836485	0.0322418604651163	2.44541484716538e-05
0.005	-1.5	2	1e-05	1e-04	10	1	6.47330584204007	0	3.33333333333297e-05	0.0467333333333333	0	0	0.000196108949416321	0.0653661424606845	0
0.01	-1.5	2	1e-05	1e-04	10	1	7.04368104210794	0	0.000244444444444492	0.00291111111111109	0	0	0.00081052631578963	0.00795469879518066	0
0.05	-1.5	2	1e-05	1e-04	10	1	6.78112737858464	0	0.000122222222222246	0.0123	0	0	0.000488028169014179	0.0227632802937576	0
0.005	-0.5	2	1e-05	1e-04	10	1	6.14737715628701	0	0	0.223044444444444	0	0	0	0.249071787296898	0
0.01	-0.5	2	1e-05	1e-04	10	1	6.07494855945299	0	0	0.391244444444444	0	0	0	0.41610429073857	0
0.05	-0.5	2	1e-05	1e-04	10	1	6.3556093721848	0	1.11111111110729e-05	0.153377777777778	0	0	8.78048780484784e-05	0.17820737704918	0
0.005	1	2	1e-05	1e-04	10	1	5.16959109902781	0	0.0466666666666666	0.012	0	0	0.0648132271892222	0.0223540041067762	0
0.01	1	2	1e-05	1e-04	10	1	5.71280557528292	0	0.0114555555555556	0.0105	0	0	0.0180675938803894	0.0202156196943972	0
0.05	1	2	1e-05	1e-04	10	1	6.0930557086615	0	9.9999999999989e-05	0.0920666666666666	0	0	0.00042832861189797	0.113911971638942	0
0.005	-1.5	10	1e-05	1e-04	10	1	6.00251996261898	0	0.108177777777778	0.000111111111111062	0	0	0.135103083700441	0.00109090909090861	0
0.01	-1.5	10	1e-05	1e-04	10	1	5.98441281341047	0	0.000977777777777744	0.0295111111111112	0	0	0.00234294770206014	0.0451627530364373	0
0.05	-1.5	10	1e-05	1e-04	10	1	6.05684141024449	0	0.0173333333333333	0.00143333333333329	0	0	0.0260172071475844	0.00492918877937816	0
0.005	-0.5	10	1e-05	1e-04	10	1	5.72185914988717	0	0.00326666666666664	0.0306555555555555	0	0	0.00646774334351806	0.0465685197588747	0
0.01	-0.5	10	1e-05	1e-04	10	1	4.94325173392151	0	0.00145555555555554	0.269477777777778	0	0	0.00334298734177212	0.294968918918919	0
0.05	-0.5	10	1e-05	1e-04	10	1	5.93914494038922	0	0.000255555555555564	0.0689333333333333	0	0	0.00083817787418658	0.0890830769230769	0
0.005	1	10	1e-05	1e-04	10	1	3.11442966386264	0.00434444444444444	0.739244444444444	0.0452	0.00419999999999998	0.00453333333333333	0.810113043478261	0.0636335195530727	0.00438260869565215
0.01	1	10	1e-05	1e-04	10	1	2.50784016537776	0.0321333333333333	0.842822222222222	0.1251	0.0313	0.0326955585464334	0.853738633318446	0.148937952755905	0.0318690909090909
0.05	1	10	1e-05	1e-04	10	1	3.80250133378578	0.000244444444444444	0.0787555555555556	0.223111111111111	0.000233333333333308	0.000262437869822485	0.102949625360231	0.249084912626138	0.000250568181818154
0.005	-1.5	2	0	0.001	10	1	6.68153805793787	0	0.000122222222222246	0.0136444444444445	0	0	0.000488028169014179	0.0246676763650857	0
0.01	-1.5	2	0	0.001	10	1	7.14327036275471	0	0.000388888888888883	0.00125555555555557	0	0	0.00113222079589215	0.00449148264984231	0
0.05	-1.5	2	0	0.001	10	1	6.71775235635487	0	9.9999999999989e-05	0.0186111111111111	0	0	0.00042832861189797	0.0314296351451974	0
0.005	-0.5	2	0	0.001	10	1	5.98441281341047	0	0	0.3839	0	0	0	0.408868372857478	0
0.01	-0.5	2	0	0.001	10	1	6.23791290232953	0	0	0.231055555555556	0	0	0	0.257194601226994	0
0.05	-0.5	2	0	0.001	10	1	6.49141299124858	0	0	0.0847111111111111	0	0	0	0.106027696551724	0
0.005	1	2	0	0.001	10	1	5.54078765780213	0	0.0487777777777778	0.00292222222222227	0	0	0.0672919708029198	0.00798025285972319	0
0.01	1	2	0	0.001	10	1	5.64943055305316	0	0.00641111111111115	0.0187777777777778	0	0	0.0112803723816913	0.0316639405204461	0
0.05	1	2	0	0.001	10	1	5.82144847053394	0	5.55555555555864e-05	0.216077777777778	0	0	0.000276013143483176	0.242426119218402	0
0.005	-1.5	10	0	0.001	10	1	6.02062711182748	0	0.113066666666667	8.88888888889161e-05	0	0	0.13986103081538	0.000955450236967117	0
0.01	-1.5	10	0	0.001	10	1	6.43709154362307	0	0.00583333333333336	0.00122222222222224	0	0	0.0104543658632952	0.00440349483717241	0
0.05	-1.5	10	0	0.001	10	1	6.1292700070785	0	0.0192777777777777	0.000788888888888839	0	0	0.0287644736842105	0.00352204724409427	0
0.005	-0.5	10	0	0.001	10	1	5.65848412765741	0	0.00262222222222219	0.0401888888888889	0	0	0.00543371402466874	0.0577436807095344	0
0.01	-0.5	10	0	0.001	10	1	5.51362693398938	0	0.000933333333333342	0.101711111111111	0	0	0.00224475079533406	0.123955292853305	0
0.05	-0.5	10	0	0.001	10	1	5.71280557528292	0	0.000122222222222246	0.154488888888889	0	0	0.000488028169014179	0.179360532377783	0
0.005	1	10	0	0.001	10	1	3.28644758134342	0.00197777777777778	0.7599	0.0234777777777778	0.00194444444444442	0.00208293475737172	0.82117840665874	0.0376574257425743	0.00204830469112863
0.01	1	10	0	0.001	10	1	2.74323310508831	0.0149444444444444	0.779622222222222	0.0962444444444445	0.0145999999999999	0.0153401221995927	0.827474649204864	0.118182133188955	0.014989950203712
0.05	1	10	0	0.001	10	1	4.30044793701963	0	0.129633333333333	0.0417999999999999	0	0	0.155436637589215	0.0597180472440944	0
0.005	-1.5	2	1e-05	0.001	10	1	6.79018095318889	0	0.000233333333333308	0.00682222222222217	0	0	0.000783999999999914	0.014631489361702	0
0.01	-1.5	2	1e-05	0.001	10	1	6.97125244527393	0	0.000133333333333319	0.00487777777777776	0	0	0.000519587628865922	0.0115478079331941	0
0.05	-1.5	2	1e-05	0.001	10	1	6.89882384843991	0	0.000133333333333319	0.00496666666666667	0	0	0.000519587628865922	0.0116729533678757	0
0.005	-0.5	2	1e-05	0.001	10	1	6.16548430549551	0	0	0.213188888888889	0	0	0	0.239696654275093	0
0.01	-0.5	2	1e-05	0.001	10	1	6.05684141024449	0	0	0.409322222222222	0	0	0	0.433906426735219	0
0.05	-0.5	2	1e-05	0.001	10	1	6.11116285787	0	0	0.366411111111111	0	0	0	0.391160461285008	0
0.005	1	2	1e-05	0.001	10	1	5.21485897204907	0	0.0386777777777778	0.0127	0	0	0.0549287413901065	0.0233038834951457	0
0.01	1	2	1e-05	0.001	10	1	5.74901987369993	0	0.00792222222222227	0.0106333333333334	0	0	0.0133290801186945	0.0204030456852793	0
0.05	1	2	1e-05	0.001	10	1	5.98441281341047	0	1.11111111110729e-05	0.149011111111111	0	0	8.78048780484784e-05	0.173840473129339	0
0.005	-1.5	10	1e-05	0.001	10	1	6.03873426103599	0	0.116588888888889	3.33333333333297e-05	0	0	0.143272983216026	0.000579310344827522	0
0.01	-1.5	10	1e-05	0.001	10	1	6.32844864837204	0	0.00407777777777774	0.00301111111111108	0	0	0.00779797639123095	0.00814940334128869	0
0.05	-1.5	10	1e-05	0.001	10	1	6.27412720074653	0	0.0287777777777778	0.000288888888888894	0	0	0.0420812379110252	0.00192705882352945	0
0.005	-0.5	10	1e-05	0.001	10	1	5.80334132132544	0	0.00207777777777773	0.0332333333333333	0	0	0.00447733966745834	0.04952247043364	0
0.01	-0.5	10	1e-05	0.001	10	1	5.43214476255111	0	0.000933333333333342	0.130588888888889	0	0	0.00224475079533406	0.154863058823529	0
0.05	-0.5	10	1e-05	0.001	10	1	6.07494855945299	0	0.000577777777777788	0.0326666666666666	0	0	0.00150447761194033	0.0488224052718286	0
0.005	1	10	1e-05	0.001	10	1	2.57121518760753	0.0256	0.786677777777778	0.132855555555556	0.0250444444444444	0.0261299729972997	0.828489466357308	0.157263256784969	0.0255744259342638
0.01	1	10	1e-05	0.001	10	1	2.9152510225691	0.00871111111111111	0.750988888888889	0.0694	0.00846666666666662	0.00900697515386369	0.815924694610779	0.0895585775248933	0.00876021897810214
0.05	1	10	1e-05	0.001	10	1	4.14653716874735	3.33333333333333e-05	0.141166666666667	0.0593555555555556	3.33333333333297e-05	3.64864864864865e-05	0.166753125	0.079295406360424	3.64776839565702e-05
0.005	-1.5	2	1e-04	0.001	10	1	6.74491308016763	0	0.000255555555555564	0.00929999999999997	0	0	0.00083817787418658	0.0184374125874125	0
0.01	-1.5	2	1e-04	0.001	10	1	7.16137751196322	0	0.000322222222222224	0.00126666666666664	0	0	0.000995640326975482	0.00450989010989001	0
0.05	-1.5	2	1e-04	0.001	10	1	6.78112737858464	0	5.55555555555864e-05	0.0125555555555555	0	0	0.000276013143483176	0.0230948905109489	0
0.005	-0.5	2	1e-04	0.001	10	1	6.27412720074653	0	1.11111111110729e-05	0.137677777777778	0	0	8.78048780484784e-05	0.162251597817615	0
0.01	-0.5	2	1e-04	0.001	10	1	5.8848234927637	0	0	0.623377777777778	0	0	0	0.641770676350431	0
0.05	-0.5	2	1e-04	0.001	10	1	6.1292700070785	0	0	0.319366666666667	0	0	0	0.344096722090261	0
0.005	1	2	1e-04	0.001	10	1	5.59510910542765	0	0.0697666666666666	0.00131111111111115	0	0	0.0920214015702239	0.00464988272087583	0
0.01	1	2	1e-04	0.001	10	1	5.47741263557237	0	0.00617777777777773	0.0325444444444445	0	0	0.0109334373780725	0.0486718100890208	0
0.05	1	2	1e-04	0.001	10	1	5.61321625463615	0	1.11111111110729e-05	0.437944444444444	0	0	8.78048780484784e-05	0.461980465116279	0
0.005	-1.5	10	1e-04	0.001	10	1	6.06589498484874	0	0.124622222222222	5.55555555555864e-05	0	0	0.150850373532551	0.000759036144578735	0
0.01	-1.5	10	1e-04	0.001	10	1	5.89387706736796	0	0.000644444444444447	0.0488333333333333	0	0	0.0016367301231803	0.0676980440097799	0
0.05	-1.5	10	1e-04	0.001	10	1	5.93914494038922	0	0.0105111111111111	0.00412222222222225	0	0	0.0167586643233744	0.0102177049180329	0
0.005	-0.5	10	1e-04	0.001	10	1	5.98441281341047	0	0.00211111111111106	0.0170888888888889	0	0	0.00454054054054044	0.0293952218430035	0
0.01	-0.5	10	1e-04	0.001	10	1	5.3959304641341	0	0.000933333333333342	0.134644444444444	0	0	0.00224475079533406	0.159256114732725	0
0.05	-0.5	10	1e-04	0.001	10	1	6.03873426103599	0	0.000455555555555542	0.0397555555555555	0	0	0.00127006760909646	0.0573390143084261	0
0.005	1	10	1e-04	0.001	10	1	2.23623292725021	0.065	0.75	0.2892	0.0635	0.0656220787892277	0.815436241610738	0.314885069611138	0.064150556792873
0.01	1	10	1e-04	0.001	10	1	3.35887617817744	0.0013	0.622322222222222	0.0386222222222222	0.00125555555555557	0.00137518656716418	0.699418632309217	0.0559713738019169	0.00132817164179105
0.05	1	10	1e-04	0.001	10	1	4.05600142270483	3.33333333333333e-05	0.0850222222222222	0.124844444444444	3.33333333333297e-05	3.64864864864865e-05	0.110472873102263	0.148711764705882	3.64776839565702e-05
0.005	-1.5	2	0	0.01	10	1	6.81734167700164	0	0.000288888888888894	0.00544444444444447	0	0	0.000922816901408467	0.0124664310954064	0
0.01	-1.5	2	0	0.01	10	1	7.20664538498447	0	0.000388888888888883	0.000711111111111107	0	0	0.00113222079589215	0.00337053291536048	0
0.05	-1.5	2	0	0.01	10	1	6.88071669923141	0	0.000255555555555564	0.00594444444444442	0	0	0.00083817787418658	0.0132814159292036	0
0.005	-0.5	2	0	0.01	10	1	6.43709154362307	0	3.33333333333297e-05	0.0651555555555555	0	0	0.000196108949416321	0.085417803468208	0
0.01	-0.5	2	0	0.01	10	1	6.22885932772527	0	0	0.234188888888889	0	0	0	0.260107933398629	0
0.05	-0.5	2	0	0.01	10	1	6.59100231189535	0	4.44444444444025e-05	0.0523555555555556	0	0	0.00023773584905638	0.0713810640216412	0
0.005	1	2	0	0.01	10	1	5.26918041967458	0	0.0365333333333333	0.0118	0	0	0.0521937637795275	0.0220811881188119	0
0.01	1	2	0	0.01	10	1	5.97535923880622	0	0.0157777777777778	0.00244444444444447	0	0	0.0238480506497834	0.00696045197740121	0
0.05	1	2	0	0.01	10	1	6.29223434995504	0	0.000144444444444392	0.0319444444444444	0	0	0.00054966442953	0.0480278422273782	0
0.005	-1.5	10	0	0.01	10	1	5.94819851499347	0	0.145388888888889	6.66666666666593e-05	0	0	0.17085652173913	0.000833057851239578	0
0.01	-1.5	10	0	0.01	10	1	6.47330584204007	0	0.00646666666666662	0.000911111111111085	0	0	0.0113560975609755	0.00379504132231394	0
0.05	-1.5	10	0	0.01	10	1	6.38277009599756	0	0.0381222222222222	8.88888888889161e-05	0	0	0.0542416562107904	0.000955450236967117	0
0.005	-0.5	10	0	0.01	10	1	5.74901987369993	0	0.00283333333333335	0.0280666666666667	0	0	0.00576581426648726	0.0433618528610355	0
0.01	-0.5	10	0	0.01	10	1	5.91198421657646	0	0.00334444444444448	0.0134777777777778	0	0	0.00658723404255327	0.0244638655462185	0
0.05	-0.5	10	0	0.01	10	1	6.28318077535079	0	0.00127777777777782	0.0111222222222223	0	0	0.00297841726618715	0.0211089539748955	0
0.005	1	10	0	0.01	10	1	3.22307255911366	0.00265555555555556	0.815711111111111	0.0213111111111111	0.00257777777777779	0.00278897893030794	0.835795256381297	0.0349610126582278	0.00270729335494329
0.01	1	10	0	0.01	10	1	2.88809029875634	0.00948888888888889	0.837688888888889	0.0490333333333334	0.00932222222222223	0.0097977691782381	0.849297451944569	0.0679491753207086	0.00962786885245903
0.05	1	10	0	0.01	10	1	4.51773372752167	0	0.110911111111111	0.0303666666666667	0	0	0.13768275862069	0.0462577658503857	0
0.005	-1.5	2	1e-05	0.01	10	1	6.75396665477188	0	0.000255555555555564	0.00829999999999997	0	0	0.00083817787418658	0.0169972009029345	0
0.01	-1.5	2	1e-05	0.01	10	1	7.1070560643377	0	0.000333333333333297	0.00194444444444442	0	0	0.00101612903225795	0.0060287081339712	0
0.05	-1.5	2	1e-05	0.01	10	1	6.96219887066967	0	0.000233333333333308	0.00324444444444449	0	0	0.000783999999999914	0.00859626168224312	0
0.005	-0.5	2	1e-05	0.01	10	1	6.3556093721848	0	1.11111111110729e-05	0.0960888888888889	0	0	8.78048780484784e-05	0.118023070674249	0
0.01	-0.5	2	1e-05	0.01	10	1	6.31034149916354	0	0	0.175511111111111	0	0	0	0.201141586659929	0
0.05	-0.5	2	1e-05	0.01	10	1	6.40993081981031	0	1.11111111110729e-05	0.121433333333333	0	0	8.78048780484784e-05	0.145067579668159	0
0.005	1	2	1e-05	0.01	10	1	5.71280557528292	0	0.0660777777777778	0.000866666666666682	0	0	0.0875376168224299	0.00371568998109648	0
0.01	1	2	1e-05	0.01	10	1	5.8667163435552	0	0.0145444444444445	0.00403333333333333	0	0	0.0221611017803158	0.0100911196911197	0
0.05	1	2	1e-05	0.01	10	1	6.25602005153803	0	0.000155555555555575	0.0404777777777777	0	0	0.000578835110746587	0.0581035443037974	0
0.005	-1.5	10	1e-05	0.01	10	1	6.18359145470402	0	0.160611111111111	2.22222222222568e-05	0	0	0.186087356321839	0.000473239436620454	0
0.01	-1.5	10	1e-05	0.01	10	1	6.36466294678905	0	0.00437777777777781	0.002	0	0	0.00828090075062559	0.00611320754716982	0
0.05	-1.5	10	1e-05	0.01	10	1	6.45519869283157	0	0.0482777777777778	6.66666666666593e-05	0	0	0.0666833130328867	0.000833057851239578	0
0.005	-0.5	10	1e-05	0.01	10	1	6.23791290232953	0	0.00444444444444447	0.00337777777777781	0	0	0.008396501457726	0.00885129982668987	0
0.01	-0.5	10	1e-05	0.01	10	1	5.8486091943467	0	0.00271111111111111	0.0204888888888889	0	0	0.00557461468721668	0.0338570491803279	0
0.05	-0.5	10	1e-05	0.01	10	1	6.02968068643173	0	0.000499999999999945	0.0382555555555556	0	0	0.00134519572953722	0.0555109404990404	0
0.005	1	10	1e-05	0.01	10	1	2.2000186288332	0.0706777777777778	0.848411111111111	0.220733333333333	0.0692888888888888	0.0712432	0.858497613205443	0.246916498150432	0.0698897931954636
0.01	1	10	1e-05	0.01	10	1	3.48562622263696	0.00121111111111111	0.6358	0.0249333333333334	0.00117777777777783	0.00128175454969669	0.713858613861386	0.0394205646566748	0.00124647690153996
0.05	1	10	1e-05	0.01	10	1	3.83871563220279	0.000166666666666667	0.0757555555555556	0.216488888888889	0.000155555555555575	0.000179572446555819	0.0993716599190284	0.242707266435986	0.000167760342368067
0.005	-1.5	2	1e-04	0.01	10	1	6.93503814685692	0	0.000499999999999945	0.00214444444444439	0	0	0.00134519572953722	0.00637849180327854	0
0.01	-1.5	2	1e-04	0.01	10	1	7.22475253419298	0	0.000511111111111129	0.000677777777777777	0	0	0.00136617560400712	0.00328110992529349	0
0.05	-1.5	2	1e-04	0.01	10	1	6.87166312462716	0	0.000222222222222235	0.00670000000000004	0	0	0.000754491017964114	0.0144513552068474	0
0.005	-0.5	2	1e-04	0.01	10	1	6.27412720074653	0	1.11111111110729e-05	0.139033333333333	0	0	8.78048780484784e-05	0.163636533471718	0
0.01	-0.5	2	1e-04	0.01	10	1	6.13832358168276	0	0	0.3212	0	0	0	0.345989836143434	0
0.05	-0.5	2	1e-04	0.01	10	1	6.31939507376779	0	1.11111111110729e-05	0.1769	0	0	8.78048780484784e-05	0.20257975258773	0
0.005	1	2	1e-04	0.01	10	1	5.34160901650859	0	0.0468888888888889	0.00621111111111106	0	0	0.0650820073439412	0.0136566165777992	0
0.01	1	2	1e-04	0.01	10	1	5.56794838161489	0	0.00965555555555553	0.0176222222222222	0	0	0.015553125	0.0301184626978146	0
0.05	1	2	1e-04	0.01	10	1	5.8848234927637	0	9.9999999999989e-05	0.188255555555556	0	0	0.00042832861189797	0.214339156626506	0
0.005	-1.5	10	1e-04	0.01	10	1	6.15643073089126	0	0.151588888888889	3.33333333333297e-05	0	0	0.177035839340886	0.000579310344827522	0
0.01	-1.5	10	1e-04	0.01	10	1	6.46425226743582	0	0.00665555555555553	0.00109999999999999	0	0	0.0116069204152249	0.00418590604026842	0
0.05	-1.5	10	1e-04	0.01	10	1	6.32844864837204	0	0.0336666666666666	0.000144444444444392	0	0	0.0484799999999999	0.00127223300970827	0
0.005	-0.5	10	1e-04	0.01	10	1	5.63132340384465	0	0.00491111111111109	0.0266111111111111	0	0	0.00909257142857139	0.0414519230769231	0
0.01	-0.5	10	1e-04	0.01	10	1	5.57700195621914	0	0.00117777777777783	0.0751666666666667	0	0	0.00276951788491459	0.0957472620050548	0
0.05	-0.5	10	1e-04	0.01	10	1	5.94819851499347	0	0.000344444444444481	0.0701000000000001	0	0	0.00103813953488383	0.0903077534791253	0
0.005	1	10	1e-04	0.01	10	1	2.72512595587981	0.0171333333333333	0.8115	0.0851444444444445	0.0166111111111111	0.0175631186440678	0.834665943012212	0.106512741312741	0.0170354962695004
0.01	1	10	1e-04	0.01	10	1	2.94241174638185	0.00763333333333333	0.736911111111111	0.0702222222222222	0.00743333333333329	0.00790881681132937	0.808765739172514	0.090413851830826	0.00770511882998167
0.05	1	10	1e-04	0.01	10	1	5.10621607679805	0	0.0885666666666667	0.00557777777777779	0	0	0.114130227272727	0.012694831911691	0
0.005	-1.5	2	0.001	0.01	10	1	6.79923452779314	0	0.000233333333333308	0.00622222222222224	0	0	0.000783999999999914	0.0136744186046512	0
0.01	-1.5	2	0.001	0.01	10	1	7.11610963894196	0	0.000277777777777821	0.00141111111111114	0	0	0.000896159317212089	0.00487123287671243	0
0.05	-1.5	2	0.001	0.01	10	1	6.91693099764842	0	0.000155555555555575	0.00516666666666665	0	0	0.000578835110746587	0.0119693564862104	0
0.005	-0.5	2	0.001	0.01	10	1	6.6181630357081	0	6.66666666666593e-05	0.0238888888888888	0	0	0.000318315789473649	0.0381549295774647	0
0.01	-0.5	2	0.001	0.01	10	1	6.31939507376779	0	0	0.167355555555556	0	0	0	0.192526977687627	0
0.05	-0.5	2	0.001	0.01	10	1	6.6181630357081	0	2.22222222222568e-05	0.0440333333333334	0	0	0.000147584187408721	0.0623198751950079	0
0.005	1	2	0.001	0.01	10	1	5.77618059751268	0	0.0932111111111111	0.000299999999999967	0	0	0.119301805869075	0.00196363636363615	0
0.01	1	2	0.001	0.01	10	1	6.14737715628701	0	0.0226777777777778	0.000788888888888839	0	0	0.0336825147347741	0.00352204724409427	0
0.05	1	2	0.001	0.01	10	1	6.13832358168276	0	0.000111111111111062	0.0738666666666666	0	0	0.000457765667574729	0.0943297297297297	0
0.005	-1.5	10	0.001	0.01	10	1	6.05684141024449	0	0.1294	3.33333333333297e-05	0	0	0.15528	0.000579310344827522	0
0.01	-1.5	10	0.001	0.01	10	1	6.38277009599756	0	0.00549999999999995	0.00208888888888892	0	0	0.00995530726256974	0.0062708140304435	0
0.05	-1.5	10	0.001	0.01	10	1	6.31034149916354	0	0.0313333333333333	0.000188888888888905	0	0	0.0454228187919463	0.00148750000000013	0
0.005	-0.5	10	0.001	0.01	10	1	6.04778783564024	0	0.00356666666666672	0.00955555555555554	0	0	0.00694351931330482	0.0188616187989556	0
0.01	-0.5	10	0.001	0.01	10	1	5.80334132132544	0	0.00278888888888884	0.0239444444444444	0	0	0.00568812949640278	0.0382033063665142	0
0.05	-0.5	10	0.001	0.01	10	1	5.98441281341047	0	0.000455555555555542	0.0527111111111112	0	0	0.00127006760909646	0.0718226494442776	0
0.005	1	10	0.001	0.01	10	1	3.79344775918153	0.000233333333333333	0.721155555555556	0.0059555555555556	0.000233333333333308	0.000250746268656716	0.797649743964887	0.0132814159292036	0.000250568181818154
0.01	1	10	0.001	0.01	10	1	4.00167997507932	7.77777777777778e-05	0.703855555555556	0.00305555555555559	7.77777777777322e-05	8.43615494978479e-05	0.784444422604423	0.00823040380047515	8.43413817833596e-05
0.05	1	10	0.001	0.01	10	1	3.96546567666231	0.000166666666666667	0.1462	0.0904666666666667	0.000166666666666648	0.000179572446555819	0.17149294026377	0.11218064516129	0.00017948717948716
0.005	-1.5	2	0	0.1	10	1	6.95314529606542	0	0.000477777777777799	0.00188888888888894	0	0	0.00130162162162168	0.00589270976616247	0
0.01	-1.5	2	0	0.1	10	1	7.07989534052495	0	0.000255555555555564	0.00190000000000001	0	0	0.00083817787418658	0.00591923076923081	0
0.05	-1.5	2	0	0.1	10	1	6.8445024008144	0	0.000111111111111062	0.00751111111111114	0	0	0.000457765667574729	0.0156934131736527	0
0.005	-0.5	2	0	0.1	10	1	6.40993081981031	0	2.22222222222568e-05	0.0738111111111112	0	0	0.000147584187408721	0.0943118873239437	0
0.01	-0.5	2	0	0.1	10	1	6.13832358168276	0	0	0.324088888888889	0	0	0	0.348853156146179	0
0.05	-0.5	2	0	0.1	10	1	6.43709154362307	0	0	0.108377777777778	0	0	0	0.131058810983738	0
0.005	1	2	0	0.1	10	1	5.93009136578496	0	0.104577777777778	0.000111111111111062	0	0	0.131731407942238	0.00109090909090861	0
0.01	1	2	0	0.1	10	1	5.52268050859363	0	0.0109111111111111	0.0184777777777778	0	0	0.0173051748251748	0.031274328358209	0
0.05	1	2	0	0.1	10	1	6.22885932772527	0	7.77777777777322e-05	0.0449333333333334	0	0	0.000355287009063236	0.0633958320373251	0
0.005	-1.5	10	0	0.1	10	1	5.89387706736796	0	0.107811111111111	0.000222222222222235	0	0	0.134756461835216	0.00165245901639354	0
0.01	-1.5	10	0	0.1	10	1	6.44614511822732	0	0.00616666666666665	0.00118888888888891	0	0	0.0109180327868852	0.00433504823151132	0
0.05	-1.5	10	0	0.1	10	1	6.3556093721848	0	0.0365333333333333	9.9999999999989e-05	0	0	0.0521937637795275	0.00101704035874428	0
0.005	-0.5	10	0	0.1	10	1	6.15643073089126	0	0.00434444444444448	0.00531111111111116	0	0	0.00822127659574476	0.012235246317928	0
0.01	-0.5	10	0	0.1	10	1	5.6403769784489	0	0.0015222222222222	0.0580444444444445	0	0	0.0034767371601208	0.0778963313609468	0
0.05	-0.5	10	0	0.1	10	1	6.29223434995504	0	0.00102222222222226	0.00991111111111109	0	0	0.00243785488958999	0.0193196390201976	0
0.005	1	10	0	0.1	10	1	2.57121518760753	0.0262888888888889	0.833355555555556	0.113466666666667	0.0255555555555556	0.026821052631579	0.845660134228188	0.136666171003718	0.0260846084608461
0.01	1	10	0	0.1	10	1	3.9292513782453	0.000122222222222222	0.739388888888889	0.00355555555555553	0.000122222222222246	0.00013206288708909	0.810113043478261	0.00917928286852584	0.000132031436056229
0.05	1	10	0	0.1	10	1	4.44530513068766	0	0.0999777777777778	0.0407555555555555	0	0	0.12681744966443	0.0584283185840708	0
0.005	-1.5	2	1e-05	0.1	10	1	6.96219887066967	0	0.000477777777777799	0.00168888888888885	0	0	0.00130162162162168	0.00544477611940286	0
0.01	-1.5	2	1e-05	0.1	10	1	7.05273461671219	0	0.000211111111111162	0.00268888888888885	0	0	0.000728767123287846	0.00749189189189179	0
0.05	-1.5	2	1e-05	0.1	10	1	7.02557389289944	0	0.00037777777777781	0.002	0	0	0.00111056383668188	0.00611320754716982	0
0.005	-0.5	2	1e-05	0.1	10	1	6.31939507376779	0	0	0.113822222222222	0	0	0	0.137058030262809	0
0.01	-0.5	2	1e-05	0.1	10	1	6.24696647693378	0	0	0.221077777777778	0	0	0	0.247181074420897	0
0.05	-0.5	2	1e-05	0.1	10	1	6.59100231189535	0	0	0.0509111111111111	0	0	0	0.0697682175226586	0
0.005	1	2	1e-05	0.1	10	1	5.6403769784489	0	0.072	0.00106666666666666	0	0	0.0947467362924281	0.004131853116994	0
0.01	1	2	1e-05	0.1	10	1	5.68564485147016	0	0.00739999999999996	0.0147555555555555	0	0	0.0126379518072289	0.0262990962671905	0
0.05	1	2	1e-05	0.1	10	1	6.02968068643173	0	0.000155555555555575	0.101355555555556	0	0	0.000578835110746587	0.1235551733405	0
0.005	-1.5	10	1e-05	0.1	10	1	5.53173408319788	0	0.0983777777777778	0.00101111111111107	0	0	0.125172959326788	0.00400558951965051	0
0.01	-1.5	10	1e-05	0.1	10	1	6.63627018491661	0	0.0117222222222222	0.000133333333333319	0	0	0.0184177346726705	0.00122926829268279	0
0.05	-1.5	10	1e-05	0.1	10	1	6.30128792455929	0	0.0384666666666666	0.000177777777777832	0	0	0.0546460382085813	0.0014348754448403	0
0.005	-0.5	10	1e-05	0.1	10	1	6.06589498484874	0	0.00444444444444447	0.00643333333333329	0	0	0.008396501457726	0.0140498796340875	0
0.01	-0.5	10	1e-05	0.1	10	1	5.83050204513819	0	0.00315555555555558	0.0203555555555556	0	0	0.00628340649692717	0.0337227173119065	0
0.05	-0.5	10	1e-05	0.1	10	1	6.10210928326575	0	0.000644444444444447	0.0262	0	0	0.0016367301231803	0.0410086956521739	0
0.005	1	10	1e-05	0.1	10	1	2.57121518760753	0.0259444444444444	0.818566666666667	0.119322222222222	0.0252111111111111	0.0264755905511811	0.836642271293375	0.142846555819477	0.0257388251181634
0.01	1	10	1e-05	0.1	10	1	3.15064396227964	0.00348888888888889	0.8491	0.0219666666666667	0.00336666666666663	0.00365065743944637	0.858751401869159	0.0357391678622669	0.00352276816608993
0.05	1	10	1e-05	0.1	10	1	4.30950151162388	1.11111111111111e-05	0.142711111111111	0.0378444444444445	0	1.23287671232877e-05	0.168183320342946	0.0550376402693171	0
0.005	-1.5	2	1e-04	0.1	10	1	6.69964520714637	0	0.000166666666666648	0.0122888888888889	0	0	0.000609186140209441	0.022752	0
0.01	-1.5	2	1e-04	0.1	10	1	7.0708417659207	0	0.000222222222222235	0.00222222222222224	0	0	0.000754491017964114	0.00654970760233922	0
0.05	-1.5	2	1e-04	0.1	10	1	6.98935959448243	0	0.000288888888888894	0.00286666666666668	0	0	0.000922816901408467	0.00787118644067801	0
0.005	-0.5	2	1e-04	0.1	10	1	6.22885932772527	0	1.11111111110729e-05	0.164744444444444	0	0	8.78048780484784e-05	0.189713328255903	0
0.01	-0.5	2	1e-04	0.1	10	1	6.43709154362307	0	3.33333333333297e-05	0.100577777777778	0	0	0.000196108949416321	0.122738983050847	0
0.05	-0.5	2	1e-04	0.1	10	1	6.28318077535079	0	0	0.204722222222222	0	0	0	0.231460618145563	0
0.005	1	2	1e-04	0.1	10	1	5.75807344830418	0	0.0597111111111112	0.000866666666666682	0	0	0.0796382240517496	0.00371568998109648	0
0.01	1	2	1e-04	0.1	10	1	5.93914494038922	0	0.0134333333333333	0.00370000000000004	0	0	0.0207045871559632	0.00945000000000009	0
0.05	1	2	1e-04	0.1	10	1	6.23791290232953	0	0.000188888888888905	0.0441333333333334	0	0	0.000671473354232033	0.0624419213973799	0
0.005	-1.5	10	1e-04	0.1	10	1	6.10210928326575	0	0.135711111111111	1.11111111110729e-05	0	0	0.161401573151547	0.000359999999998761	0
0.01	-1.5	10	1e-04	0.1	10	1	6.59100231189535	0	0.0101222222222223	0.000299999999999967	0	0	0.0162012702893437	0.00196363636363615	0
0.05	-1.5	10	1e-04	0.1	10	1	6.31034149916354	0	0.0308888888888889	0.000199999999999978	0	0	0.0449076923076923	0.0015376271186439	0
0.005	-0.5	10	1e-04	0.1	10	1	5.8848234927637	0	0.00342222222222222	0.0167222222222222	0	0	0.00671709216789267	0.0289180327868852	0
0.01	-0.5	10	1e-04	0.1	10	1	5.90293064197221	0	0.00290000000000001	0.0185999999999999	0	0	0.00587250000000003	0.0314225698324022	0
0.05	-0.5	10	1e-04	0.1	10	1	6.07494855945299	0	0.000766666666666693	0.0277666666666667	0	0	0.00189514986376028	0.0430449760765551	0
0.005	1	10	1e-04	0.1	10	1	3.4041440511987	0.00141111111111111	0.732766666666667	0.0194444444444445	0.00135555555555555	0.00148994413407821	0.806705751031303	0.0324808244387192	0.00143161816065192
0.01	1	10	1e-04	0.1	10	1	3.94735852745381	1e-04	0.748877777777778	0.00294444444444442	9.9999999999989e-05	0.000108206106870229	0.814997504798464	0.00802162162162155	0.000108180300500823
0.05	1	10	1e-04	0.1	10	1	4.42719798147916	0	0.129155555555556	0.0314444444444445	0	0	0.155095394388565	0.0474491017964073	0
0.005	-1.5	2	0.001	0.1	10	1	6.79018095318889	0	0.000266666666666637	0.00698888888888893	0	0	0.000867096774193453	0.0148973684210527	0
0.01	-1.5	2	0.001	0.1	10	1	6.78112737858464	0	9.9999999999989e-05	0.0180444444444444	0	0	0.00042832861189797	0.0307012753188297	0
0.05	-1.5	2	0.001	0.1	10	1	6.8626095500229	0	0.000244444444444492	0.00723333333333331	0	0	0.00081052631578963	0.0153248014946286	0
0.005	-0.5	2	0.001	0.1	10	1	6.49141299124858	0	4.44444444444025e-05	0.0484555555555556	0	0	0.00023773584905638	0.0672565483476133	0
0.01	-0.5	2	0.001	0.1	10	1	6.40993081981031	0	0	0.115877777777778	0	0	0	0.13920063559322	0
0.05	-0.5	2	0.001	0.1	10	1	6.42803796901882	0	0	0.112755555555556	0	0	0	0.135881827842721	0
0.005	1	2	0.001	0.1	10	1	6.16548430549551	0	0.115144444444444	2.22222222222568e-05	0	0	0.141773941368078	0.000473239436620454	0
0.01	1	2	0.001	0.1	10	1	6.18359145470402	0	0.0282777777777777	0.000566666666666715	0	0	0.0413901258470474	0.00300631578947394	0
0.05	1	2	0.001	0.1	10	1	6.54573443887409	0	0.000911111111111085	0.00682222222222217	0	0	0.00220415999999994	0.014631489361702	0
0.005	-1.5	10	0.001	0.1	10	1	5.94819851499347	0	0.123411111111111	0.000155555555555575	0	0	0.149757303370787	0.00133889943074021	0
0.01	-1.5	10	0.001	0.1	10	1	6.50046656585283	0	0.00713333333333332	0.00065555555555552	0	0	0.0122796204933586	0.00321470270270253	0
0.05	-1.5	10	0.001	0.1	10	1	6.08400213405725	0	0.0155999999999999	0.00139999999999996	0	0	0.0236029352901934	0.00485504587155948	0
0.005	-0.5	10	0.001	0.1	10	1	6.00251996261898	0	0.00260000000000005	0.0134444444444445	0	0	0.00539259259259269	0.0244229074889869	0
0.01	-0.5	10	0.001	0.1	10	1	5.93914494038922	0	0.0029555555555556	0.0153777777777778	0	0	0.00594255319148945	0.0271309218203035	0
0.05	-0.5	10	0.001	0.1	10	1	6.21075217851677	0	0.000766666666666693	0.0170111111111111	0	0	0.00189514986376028	0.0292836432637571	0
0.005	1	10	0.001	0.1	10	1	2.97862604479886	0.0066	0.705988888888889	0.0722111111111111	0.00635555555555556	0.00684757548032937	0.786049484536082	0.0924237020316027	0.00659848935683223
0.01	1	10	0.001	0.1	10	1	3.20496540990516	0.00303333333333333	0.778277777777778	0.0278333333333334	0.00292222222222227	0.00317984746937832	0.827474649204864	0.0431041311027655	0.00306407766990296
0.05	1	10	0.001	0.1	10	1	4.63543019737695	0	0.0876111111111111	0.0277888888888889	0	0	0.113091633466135	0.0430647078920396	0
0.005	-1.5	2	0.01	0.1	10	1	6.79923452779314	0	0.000177777777777832	0.00593333333333335	0	0	0.000638479809976443	0.0132710059171598	0
0.01	-1.5	2	0.01	0.1	10	1	6.97125244527393	0	8.88888888889161e-05	0.00463333333333338	0	0	0.000392982456140471	0.0111494960212203	0
0.05	-1.5	2	0.01	0.1	10	1	7.03462746750369	0	0.000288888888888894	0.002	0	0	0.000922816901408467	0.00611320754716982	0
0.005	-0.5	2	0.01	0.1	10	1	6.39182367060181	0	3.33333333333297e-05	0.0806888888888889	0	0	0.000196108949416321	0.101583129855716	0
0.01	-0.5	2	0.01	0.1	10	1	6.47330584204007	0	1.11111111110729e-05	0.0858555555555556	0	0	8.78048780484784e-05	0.107313529898044	0
0.05	-0.5	2	0.01	0.1	10	1	6.64532375952086	0	4.44444444444025e-05	0.0381666666666667	0	0	0.00023773584905638	0.0554174135723432	0
0.005	1	2	0.01	0.1	10	1	5.69469842607442	0	0.0777555555555556	0.000788888888888839	0	0	0.101774264281593	0.00352204724409427	0
0.01	1	2	0.01	0.1	10	1	4.96135888313002	0	0.00603333333333333	0.111966666666667	0	0	0.0107490966221524	0.135002870813397	0
0.05	1	2	0.01	0.1	10	1	6.02968068643173	0	8.88888888889161e-05	0.115788888888889	0	0	0.000392982456140471	0.139130701986755	0
0.005	-1.5	10	0.01	0.1	10	1	6.14737715628701	0	0.145911111111111	4.44444444444025e-05	0	0	0.171198344542162	0.000669767441859834	0
0.01	-1.5	10	0.01	0.1	10	1	6.52762728966559	0	0.00767777777777778	0.000544444444444458	0	0	0.0130240837696335	0.00295053763440868	0
0.05	-1.5	10	0.01	0.1	10	1	6.29223434995504	0	0.0322444444444444	0.000266666666666637	0	0	0.0466095602294455	0.00184390243902419	0
0.005	-0.5	10	0.01	0.1	10	1	6.20169860391252	0	0.00431111111111115	0.00390000000000001	0	0	0.00817867001254713	0.00982254303164912	0
0.01	-0.5	10	0.01	0.1	10	1	5.6222698292404	0	0.00134444444444448	0.0685	0	0	0.00311619826264699	0.0886999714530403	0
0.05	-0.5	10	0.01	0.1	10	1	6.1292700070785	0	0.000744444444444436	0.0248	0	0	0.00184726477024068	0.0392645026178011	0
0.005	1	10	0.01	0.1	10	1	2.39014369552249	0.0428	0.744011111111111	0.222255555555556	0.0416555555555556	0.0434028169014084	0.812430043331729	0.248374279379157	0.0422706040268456
0.01	1	10	0.01	0.1	10	1	3.15064396227964	0.00367777777777778	0.762222222222222	0.0365222222222222	0.00354444444444446	0.00384475685641853	0.821830282861897	0.053526591276252	0.00370536990089884
0.05	1	10	0.01	0.1	10	1	4.23707291478987	2.22222222222222e-05	0.0905444444444444	0.0796666666666667	2.22222222222568e-05	2.44541484716157e-05	0.116230899830221	0.100463719766472	2.44541484716538e-05
0.005	-1.5	2	0	0.5	10	1	6.75396665477188	0	0.000199999999999978	0.0085777777777778	0	0	0.000698921417565408	0.0173932945909701	0
0.01	-1.5	2	0	0.5	10	1	7.02557389289944	0	0.000166666666666648	0.00306666666666666	0	0	0.000609186140209441	0.00825053380782917	0
0.05	-1.5	2	0	0.5	10	1	7.1070560643377	0	0.000511111111111129	0.00108888888888892	0	0	0.00136617560400712	0.00415757575757587	0
0.005	-0.5	2	0	0.5	10	1	6.08400213405725	0	1.11111111110729e-05	0.282711111111111	0	0	8.78048780484784e-05	0.308263846153846	0
0.01	-0.5	2	0	0.5	10	1	6.05684141024449	0	0	0.410288888888889	0	0	0	0.43482953271028	0
0.05	-0.5	2	0	0.5	10	1	6.47330584204007	0	0	0.0921666666666666	0	0	0	0.113977099236641	0
0.005	1	2	0	0.5	10	1	5.78523417211693	0	0.0689	0.000622222222222191	0	0	0.0909841048034934	0.00314648829431422	0
0.01	1	2	0	0.5	10	1	6.00251996261898	0	0.0164666666666666	0.00197777777777774	0	0	0.0247984063745019	0.00608216949152532	0
0.05	1	2	0	0.5	10	1	5.90293064197221	0	7.77777777777322e-05	0.146577777777778	0	0	0.000355287009063236	0.171581109677419	0
0.005	-1.5	10	0	0.5	10	1	5.73091272449142	0	0.129177777777778	0.000233333333333308	0	0	0.155095394388565	0.00170160771704161	0
0.01	-1.5	10	0	0.5	10	1	6.19264502930827	0	0.0034777777777778	0.0053333333333333	0	0	0.00680845921450156	0.0122677484787018	0
0.05	-1.5	10	0	0.5	10	1	6.42803796901882	0	0.0478222222222222	2.22222222222568e-05	0	0	0.0662509923664121	0.000473239436620454	0
0.005	-0.5	10	0	0.5	10	1	6.12021643247425	0	0.00393333333333334	0.00593333333333335	0	0	0.00755359864521594	0.0132710059171598	0
0.01	-0.5	10	0	0.5	10	1	6.10210928326575	0	0.00491111111111109	0.00584444444444443	0	0	0.00909257142857139	0.0131369672943508	0
0.05	-0.5	10	0	0.5	10	1	6.16548430549551	0	0.000766666666666693	0.0187666666666667	0	0	0.00189514986376028	0.0316569728523615	0
0.005	1	10	0	0.5	10	1	2.67985808285855	0.0185333333333333	0.741277777777778	0.126966666666667	0.0180444444444444	0.0189767945823928	0.810811671087533	0.151001782905087	0.0184887282584143
0.01	1	10	0	0.5	10	1	3.77534060997302	0.000366666666666667	0.646411111111111	0.00953333333333328	0.000344444444444481	0.000392820028341993	0.725413359722909	0.0188341463414633	0.000369012753897063
0.05	1	10	0	0.5	10	1	4.97041245773427	0	0.116655555555556	0.00612222222222225	0	0	0.143272983216026	0.0135465365853659	0
0.005	-1.5	2	1e-05	0.5	10	1	6.81734167700164	0	0.000177777777777832	0.00558888888888887	0	0	0.000638479809976443	0.0127073684210526	0
0.01	-1.5	2	1e-05	0.5	10	1	7.0708417659207	0	0.000199999999999978	0.00194444444444442	0	0	0.000698921417565408	0.0060287081339712	0
0.05	-1.5	2	1e-05	0.5	10	1	6.99841316908668	0	0.000277777777777821	0.00273333333333337	0	0	0.000896159317212089	0.00756923076923086	0
0.005	-0.5	2	1e-05	0.5	10	1	6.52762728966559	0	4.44444444444025e-05	0.0387999999999999	0	0	0.00023773584905638	0.0561751675710181	0
0.01	-0.5	2	1e-05	0.5	10	1	6.14737715628701	0	0	0.314355555555556	0	0	0	0.339261670235546	0
0.05	-0.5	2	1e-05	0.5	10	1	6.63627018491661	0	1.11111111110729e-05	0.0405666666666666	0	0	8.78048780484784e-05	0.0581943074003795	0
0.005	1	2	1e-05	0.5	10	1	5.25107327046607	0	0.0815666666666667	0.00377777777777777	0	0	0.10640966350302	0.00958389261744964	0
0.01	1	2	1e-05	0.5	10	1	5.6041626800319	0	0.00953333333333328	0.0175888888888889	0	0	0.0154054862842892	0.0300841628959276	0
0.05	1	2	1e-05	0.5	10	1	6.3375022229763	0	0.000244444444444492	0.0243111111111111	0	0	0.00081052631578963	0.0386523659305993	0
0.005	-1.5	10	1e-05	0.5	10	1	6.06589498484874	0	0.122866666666667	2.22222222222568e-05	0	0	0.149189935760171	0.000473239436620454	0
0.01	-1.5	10	1e-05	0.5	10	1	6.55478801347834	0	0.00947777777777781	0.000399999999999956	0	0	0.0153266310160428	0.00241276595744654	0
0.05	-1.5	10	1e-05	0.5	10	1	6.18359145470402	0	0.0248555555555555	0.000499999999999945	0	0	0.0367846003262642	0.00280346106304048	0
0.005	-0.5	10	1e-05	0.5	10	1	5.93914494038922	0	0.00227777777777782	0.0183888888888889	0	0	0.00483029453015437	0.0311471247199403	0
0.01	-0.5	10	1e-05	0.5	10	1	5.6041626800319	0	0.00244444444444447	0.0501222222222222	0	0	0.0051120331950208	0.0690151138088013	0
0.05	-0.5	10	1e-05	0.5	10	1	6.21980575312102	0	0.000877777777777755	0.0165222222222222	0	0	0.00213605150214587	0.028648623853211	0
0.005	1	10	1e-05	0.5	10	1	2.87903672415209	0.00962222222222222	0.7754	0.0680222222222222	0.0093333333333333	0.00993318161128812	0.827474649204864	0.0882324277952531	0.00963715001138171
0.01	1	10	1e-05	0.5	10	1	3.45846549882421	0.0011	0.669088888888889	0.0241444444444444	0.0010444444444444	0.00116552207428171	0.749194569242162	0.0384547752808988	0.00110691588785042
0.05	1	10	1e-05	0.5	10	1	3.97451925126656	0.000111111111111111	0.0853333333333334	0.146644444444444	8.88888888889161e-05	0.000120171673819743	0.110750214592275	0.171609595047717	9.62061560487052e-05
0.005	-1.5	2	1e-04	0.5	10	1	6.73585950556338	0	0.000144444444444392	0.00916666666666666	0	0	0.00054966442953	0.0182288469969311	0
0.01	-1.5	2	1e-04	0.5	10	1	6.8626095500229	0	0.000111111111111062	0.0107888888888888	0	0	0.000457765667574729	0.0206230088495574	0
0.05	-1.5	2	1e-04	0.5	10	1	6.85355597541865	0	9.9999999999989e-05	0.00755555555555554	0	0	0.00042832861189797	0.0157644894204231	0
0.005	-0.5	2	1e-04	0.5	10	1	6.44614511822732	0	5.55555555555864e-05	0.0622	0	0	0.000276013143483176	0.0824874598070739	0
0.01	-0.5	2	1e-04	0.5	10	1	6.04778783564024	0	1.11111111110729e-05	0.420966666666667	0	0	8.78048780484784e-05	0.445417494751575	0
0.05	-0.5	2	1e-04	0.5	10	1	6.55478801347834	0	1.11111111110729e-05	0.0622111111111111	0	0	8.78048780484784e-05	0.0824874598070739	0
0.005	1	2	1e-04	0.5	10	1	5.48646621017662	0	0.0613555555555556	0.00272222222222218	0	0	0.0815676436107855	0.00755229357798154	0
0.01	1	2	1e-04	0.5	10	1	5.24201969586182	0	0.00792222222222227	0.0485444444444444	0	0	0.0133290801186945	0.0673593147751605	0
0.05	1	2	1e-04	0.5	10	1	5.89387706736796	0	3.33333333333297e-05	0.212444444444444	0	0	0.000196108949416321	0.239059290498636	0
0.005	-1.5	10	1e-04	0.5	10	1	6.08400213405725	0	0.136822222222222	2.22222222222568e-05	0	0	0.162467434554974	0.000473239436620454	0
0.01	-1.5	10	1e-04	0.5	10	1	6.23791290232953	0	0.00331111111111115	0.00466666666666671	0	0	0.00652724902216436	0.0112178060413356	0
0.05	-1.5	10	1e-04	0.5	10	1	6.31939507376779	0	0.0326777777777778	0.000122222222222246	0	0	0.0471908309455588	0.00116962025316478	0
0.005	-0.5	10	1e-04	0.5	10	1	5.89387706736796	0	0.00537777777777781	0.0102666666666666	0	0	0.00977307692307699	0.0198675767918088	0
0.01	-0.5	10	1e-04	0.5	10	1	5.87576991815945	0	0.00364444444444445	0.0151888888888889	0	0	0.0070646153846154	0.0269128125000001	0
0.05	-0.5	10	1e-04	0.5	10	1	6.21980575312102	0	0.00176666666666669	0.00893333333333335	0	0	0.00394564254062045	0.0179457927369354	0
0.005	1	10	1e-04	0.5	10	1	3.14159038767539	0.0038	0.846744444444444	0.0235888888888889	0.00363333333333338	0.00396978350990327	0.857137424681991	0.0378089045936396	0.00379741935483876
0.01	1	10	1e-04	0.5	10	1	3.41319762580295	0.0011	0.7239	0.0201333333333333	0.00107777777777773	0.00116552207428171	0.79990509135201	0.0334278184480234	0.00114170948155063
0.05	1	10	1e-04	0.5	10	1	4.25518006399837	1.11111111111111e-05	0.106922222222222	0.0637777777777778	1.11111111110729e-05	1.23287671232877e-05	0.133829801324503	0.0840976744186047	1.23257520175658e-05
0.005	-1.5	2	0.001	0.5	10	1	6.85355597541865	0	0.000344444444444481	0.00412222222222225	0	0	0.00103813953488383	0.0102177049180329	0
0.01	-1.5	2	0.001	0.5	10	1	6.97125244527393	0	0.000111111111111062	0.00452222222222221	0	0	0.000457765667574729	0.01094016	0
0.05	-1.5	2	0.001	0.5	10	1	6.91693099764842	0	0.000255555555555564	0.00448888888888888	0	0	0.00083817787418658	0.010876923076923	0
0.005	-0.5	2	0.001	0.5	10	1	6.41898439441456	0	4.44444444444025e-05	0.0699333333333333	0	0	0.00023773584905638	0.0901698692438885	0
0.01	-0.5	2	0.001	0.5	10	1	6.31034149916354	0	0	0.175644444444444	0	0	0	0.201243546350088	0
0.05	-0.5	2	0.001	0.5	10	1	6.54573443887409	0	3.33333333333297e-05	0.0643444444444444	0	0	0.000196108949416321	0.0846725848563968	0
0.005	1	2	0.001	0.5	10	1	5.55889480701064	0	0.0533555555555556	0.00216666666666665	0	0	0.0725415642792928	0.00641933376877853	0
0.01	1	2	0.001	0.5	10	1	6.02968068643173	0	0.0175999999999999	0.00160000000000005	0	0	0.0263912727272726	0.00526676342525414	0
0.05	1	2	0.001	0.5	10	1	5.52268050859363	0	3.33333333333297e-05	0.357055555555556	0	0	0.000196108949416321	0.38180198019802	0
0.005	-1.5	10	0.001	0.5	10	1	5.6403769784489	0	0.143133333333333	0.000177777777777832	0	0	0.16854953271028	0.0014348754448403	0
0.01	-1.5	10	0.001	0.5	10	1	5.82144847053394	0	0.000944444444444414	0.0476111111111112	0	0	0.00226666666666659	0.0662872928176796	0
0.05	-1.5	10	0.001	0.5	10	1	6.21980575312102	0	0.0289333333333334	0.000399999999999956	0	0	0.0422950692877861	0.00241276595744654	0
0.005	-0.5	10	0.001	0.5	10	1	6.1292700070785	0	0.00393333333333334	0.00617777777777773	0	0	0.00755359864521594	0.0136097134531325	0
0.01	-0.5	10	0.001	0.5	10	1	5.82144847053394	0	0.00290000000000001	0.0261888888888889	0	0	0.00587250000000003	0.0410054539178461	0
0.05	-0.5	10	0.001	0.5	10	1	6.16548430549551	0	0.001	0.0164444444444445	0	0	0.00238862559241706	0.0285355776587606	0
0.005	1	10	0.001	0.5	10	1	2.58932233681603	0.0249444444444444	0.853111111111111	0.0996333333333334	0.0243111111111111	0.0254780454852511	0.86050967311541	0.121750215517241	0.0248423518810542
0.01	1	10	0.001	0.5	10	1	3.1959118353009	0.00283333333333333	0.755155555555556	0.0324888888888889	0.00272222222222218	0.00297362332253586	0.819078335724534	0.0486207852193996	0.00285701064322069
0.05	1	10	0.001	0.5	10	1	4.72596594341947	1.11111111111111e-05	0.107744444444444	0.0157888888888889	0	1.23287671232877e-05	0.134747394540943	0.0276839582528024	0
0.005	-1.5	2	0.01	0.5	10	1	6.14737715628701	0	0	0.203333333333333	0	0	0	0.230177189917644	0
0.01	-1.5	2	0.01	0.5	10	1	6.46425226743582	0	2.22222222222568e-05	0.0957555555555556	0	0	0.000147584187408721	0.117709268292683	0
0.05	-1.5	2	0.01	0.5	10	1	6.88977027383566	0	0.000144444444444392	0.0059555555555556	0	0	0.00054966442953	0.0132814159292036	0
0.005	-0.5	2	0.01	0.5	10	1	6.38277009599756	0	3.33333333333297e-05	0.0829222222222222	0	0	0.000196108949416321	0.10413488372093	0
0.01	-0.5	2	0.01	0.5	10	1	6.02062711182748	0	0	0.451611111111111	0	0	0	0.475733395262425	0
0.05	-0.5	2	0.01	0.5	10	1	6.46425226743582	0	1.11111111110729e-05	0.0949222222222222	0	0	8.78048780484784e-05	0.116983863080685	0
0.005	1	2	0.01	0.5	10	1	5.63132340384465	0	0.0572444444444444	0.00156666666666672	0	0	0.0771422459893048	0.00520615384615401	0
0.01	1	2	0.01	0.5	10	1	6.01157353722323	0	0.0166777777777778	0.00196666666666667	0	0	0.0250913432835821	0.00606032608695654	0
0.05	1	2	0.01	0.5	10	1	6.18359145470402	0	0.000166666666666648	0.0475333333333333	0	0	0.000609186140209441	0.06624	0
0.005	-1.5	10	0.01	0.5	10	1	5.8848234927637	0	0.105533333333333	0.000155555555555575	0	0	0.132677161862528	0.00133889943074021	0
0.01	-1.5	10	0.01	0.5	10	1	6.3556093721848	0	0.0120222222222223	0.000844444444444425	0	0	0.0188173913043479	0.0036689655172413	0
0.05	-1.5	10	0.01	0.5	10	1	6.21980575312102	0	0.0278777777777778	0.000344444444444481	0	0	0.0408309977397481	0.00216699029126236	0
0.005	-0.5	10	0.01	0.5	10	1	5.89387706736796	0	0.00264444444444445	0.0186555555555555	0	0	0.00547226277372264	0.03148125	0
0.01	-0.5	10	0.01	0.5	10	1	5.76712702290843	0	0.00198888888888893	0.0363222222222223	0	0	0.00432275994250128	0.0533023616952443	0
0.05	-0.5	10	0.01	0.5	10	1	6.07494855945299	0	0.000766666666666693	0.0312	0	0	0.00189514986376028	0.0471586804398534	0
0.005	1	10	0.01	0.5	10	1	3.23212613371791	0.00301111111111111	0.759988888888889	0.0290333333333334	0.00292222222222227	0.00315801156069364	0.82117840665874	0.0445217038539554	0.00306407766990296
0.01	1	10	0.01	0.5	10	1	3.31360830515618	0.0021	0.763466666666667	0.0226777777777778	0.0020444444444444	0.00221011600928074	0.822585463182898	0.0367035663338088	0.0021516473317865
0.05	1	10	0.01	0.5	10	1	4.44530513068766	2.22222222222222e-05	0.134066666666667	0.0285222222222222	2.22222222222568e-05	2.44541484716157e-05	0.159949079431878	0.0438862957937585	2.44541484716538e-05
0.005	-1.5	2	0.1	0.5	10	1	5.38687688952985	0	1.11111111110729e-05	0.764688888888889	0	0	8.78048780484784e-05	0.777370865082922	0
0.01	-1.5	2	0.1	0.5	10	1	6.3556093721848	0	0	0.151177777777778	0	0	0	0.175966743648961	0
0.05	-1.5	2	0.1	0.5	10	1	6.40087724520606	0	3.33333333333297e-05	0.0567444444444445	0	0	0.000196108949416321	0.0764003561887801	0
0.005	-0.5	2	0.1	0.5	10	1	5.49551978478087	0	0	0.935855555555556	0	0	0	0.941668322981366	0
0.01	-0.5	2	0.1	0.5	10	1	5.47741263557237	0	0	0.831966666666667	0	0	0	0.84255432016075	0
0.05	-0.5	2	0.1	0.5	10	1	6.10210928326575	0	0	0.228755555555556	0	0	0	0.254884598378777	0
0.005	1	2	0.1	0.5	10	1	4.6625909211897	0	0.0430555555555555	0.0534777777777777	0	0	0.0603305744286597	0.0727143884892086	0
0.01	1	2	0.1	0.5	10	1	3.99262640047507	0.000111111111111111	0.00273333333333337	0.730977777777778	0.000111111111111062	0.000120171673819743	0.00560506329113931	0.745272016183412	0.000120143027413534
0.05	1	2	0.1	0.5	10	1	5.47741263557237	0	0	0.654266666666667	0	0	0	0.671589409368636	0
0.005	-1.5	10	0.1	0.5	10	1	5.55889480701064	0	0.119644444444444	0.000711111111111107	0	0	0.146124717285945	0.00337053291536048	0
0.01	-1.5	10	0.1	0.5	10	1	6.21980575312102	0	0.00291111111111109	0.0058555555555555	0	0	0.00588449197860958	0.013148910891089	0
0.05	-1.5	10	0.1	0.5	10	1	5.83955561974244	0	0.0162	0.00407777777777774	0	0	0.0244292553191489	0.0101686641011544	0
0.005	-0.5	10	0.1	0.5	10	1	5.03378747996403	0	0.00107777777777773	0.262066666666667	0	0	0.00255556717198108	0.287759477124183	0
0.01	-0.5	10	0.1	0.5	10	1	4.72596594341947	0	0.00167777777777778	0.350433333333333	0	0	0.00378815331010453	0.375162992683503	0
0.05	-0.5	10	0.1	0.5	10	1	5.87576991815945	0	0.000422222222222213	0.0708555555555556	0	0	0.00120301507537686	0.0909453310696095	0
0.005	1	10	0.1	0.5	10	1	1.79260777164187	0.176011111111111	0.820555555555556	0.456577777777778	0.1731	0.176595089581951	0.837878730587441	0.48040751565762	0.173751183890241
0.01	1	10	0.1	0.5	10	1	2.39919727012674	0.0416777777777778	0.768088888888889	0.205188888888889	0.0406555555555556	0.0422931543624161	0.825018044044518	0.23187264573991	0.0412835460040296
0.05	1	10	0.1	0.5	10	1	1.9555721145184	0.125333333333333	0.122833333333333	0.984488888888889	0.171944444444444	0.125860526898384	0.149189935760171	0.987318505416759	0.172629482071713
0.005	-1.5	2	0	1e-05	2	1	6.69059163254212	0	0.000155555555555575	0.0128444444444444	0	0	0.000578835110746587	0.0235308562197092	0
0.01	-1.5	2	0	1e-05	2	1	7.07989534052495	0	0.000211111111111162	0.00206666666666666	0	0	0.000728767123287846	0.00622470119521911	0
0.05	-1.5	2	0	1e-05	2	1	6.90787742304416	0	0.000177777777777832	0.00487777777777776	0	0	0.000638479809976443	0.0115478079331941	0
0.005	-0.5	2	0	1e-05	2	1	6.49141299124858	0	4.44444444444025e-05	0.0492222222222222	0	0	0.00023773584905638	0.0680860975609756	0
0.01	-0.5	2	0	1e-05	2	1	5.75807344830418	0	0	0.773911111111111	0	0	0	0.786041379310345	0
0.05	-0.5	2	0	1e-05	2	1	6.21075217851677	0	0	0.2658	0	0	0	0.291294708866876	0
0.005	1	2	0	1e-05	2	1	5.22391254665332	0	0.0337444444444445	0.0135222222222222	0	0	0.0485611675126904	0.0245249100359856	0
0.01	1	2	0	1e-05	2	1	5.44119833715536	0	0.00711111111111107	0.0348333333333334	0	0	0.0122460136674259	0.0513500162495938	0
0.05	1	2	0	1e-05	2	1	5.57700195621914	0	4.44444444444025e-05	0.299255555555556	0	0	0.00023773584905638	0.324223549080487	0
0.005	-1.5	10	0	1e-05	2	1	6.13832358168276	0	0.147244444444444	2.22222222222568e-05	0	0	0.17245050348567	0.000473239436620454	0
0.01	-1.5	10	0	1e-05	2	1	6.36466294678905	0	0.00467777777777778	0.00222222222222224	0	0	0.00875707800247627	0.00654970760233922	0
0.05	-1.5	10	0	1e-05	2	1	6.20169860391252	0	0.0243222222222222	0.000522222222222202	0	0	0.0360188050930461	0.00290650306748455	0
0.005	-0.5	10	0	1e-05	2	1	5.93009136578496	0	0.00488888888888894	0.00988888888888884	0	0	0.00906252554147946	0.0192929032258063	0
0.01	-0.5	10	0	1e-05	2	1	5.8486091943467	0	0.00207777777777773	0.0252	0	0	0.00447733966745834	0.039772860125261	0
0.05	-0.5	10	0	1e-05	2	1	5.89387706736796	0	0.000222222222222235	0.0908666666666667	0	0	0.000754491017964114	0.112615081967213	0
0.005	1	10	0	1e-05	2	1	2.65269735904579	0.0206444444444444	0.805388888888889	0.107655555555556	0.0199888888888888	0.0211241145950823	0.832553327256153	0.130359209823812	0.0204625592417061
0.01	1	10	0	1e-05	2	1	3.18685826069665	0.00338888888888889	0.800644444444444	0.0267333333333334	0.00323333333333331	0.00354765751211632	0.832169199178645	0.0415709290366816	0.00338637728007386
0.05	1	10	0	1e-05	2	1	4.34571581004089	1.11111111111111e-05	0.0947333333333333	0.0554	1.11111111110729e-05	1.23287671232877e-05	0.121011095466066	0.0749461377870564	1.23257520175658e-05
0.005	-1.5	2	0	1e-04	2	1	6.83544882621015	0	0.000244444444444492	0.00446666666666662	0	0	0.00081052631578963	0.010834652406417	0
0.01	-1.5	2	0	1e-04	2	1	7.16137751196322	0	0.000211111111111162	0.000866666666666682	0	0	0.000728767123287846	0.00371568998109648	0
0.05	-1.5	2	0	1e-04	2	1	6.95314529606542	0	0.000322222222222224	0.00362222222222219	0	0	0.000995640326975482	0.00929847198641758	0
0.005	-0.5	2	0	1e-04	2	1	6.20169860391252	0	1.11111111110729e-05	0.183544444444444	0	0	8.78048780484784e-05	0.20960664652568	0
0.01	-0.5	2	0	1e-04	2	1	6.15643073089126	0	1.11111111110729e-05	0.3056	0	0	8.78048780484784e-05	0.33067786259542	0
0.05	-0.5	2	0	1e-04	2	1	6.34655579758055	0	0	0.159677777777778	0	0	0	0.184675777664457	0
0.005	1	2	0	1e-04	2	1	5.26918041967458	0	0.0521666666666667	0.00686666666666669	0	0	0.0712305839855509	0.0147128956069911	0
0.01	1	2	0	1e-04	2	1	4.57205517514719	0	0.0047666666666667	0.298222222222222	0	0	0.00888315529991789	0.323311663479924	0
0.05	1	2	0	1e-04	2	1	5.16959109902781	0	0	0.699344444444444	0	0	0	0.715270890642616	0
0.005	-1.5	10	0	1e-04	2	1	6.16548430549551	0	0.153766666666667	1.11111111110729e-05	0	0	0.179164038016954	0.000359999999998761	0
0.01	-1.5	10	0	1e-04	2	1	6.40993081981031	0	0.00506666666666666	0.00142222222222221	0	0	0.00929708737864077	0.00490212765957444	0
0.05	-1.5	10	0	1e-04	2	1	6.50046656585283	0	0.0543	2.22222222222568e-05	0	0	0.0736557416267943	0.000473239436620454	0
0.005	-0.5	10	0	1e-04	2	1	6.11116285787	0	0.00312222222222225	0.00738888888888889	0	0	0.00623619550858658	0.0155166666666667	0
0.01	-0.5	10	0	1e-04	2	1	5.70375200067867	0	0.002	0.0452555555555556	0	0	0.00433652007648184	0.0636524651162791	0
0.05	-0.5	10	0	1e-04	2	1	5.96630566420197	0	0.000288888888888894	0.0593666666666667	0	0	0.000922816901408467	0.079295406360424	0
0.005	1	10	0	1e-04	2	1	2.92430459717335	0.00862222222222222	0.7864	0.0595777777777777	0.00831111111111116	0.00891913340935006	0.828489466357308	0.079507149161518	0.00860319488817896
0.01	1	10	0	1e-04	2	1	2.57121518760753	0.0254888888888889	0.772477777777778	0.1412	0.0247000000000001	0.0260282755515534	0.826087128712871	0.165885314685315	0.0252340540540541
0.05	1	10	0	1e-04	2	1	4.29139436241538	1.11111111111111e-05	0.105855555555556	0.0559222222222222	1.11111111110729e-05	1.23287671232877e-05	0.132824564315353	0.075495	1.23257520175658e-05
0.005	-1.5	2	1e-05	1e-04	2	1	6.81734167700164	0	0.000233333333333308	0.00549999999999995	0	0	0.000783999999999914	0.0125556114745847	0
0.01	-1.5	2	1e-05	1e-04	2	1	6.92598457225267	0	6.66666666666593e-05	0.00575555555555551	0	0	0.000318315789473649	0.0129951219512194	0
0.05	-1.5	2	1e-05	1e-04	2	1	6.69059163254212	0	3.33333333333297e-05	0.0218111111111111	0	0	0.000196108949416321	0.0355882014388489	0
0.005	-0.5	2	1e-05	1e-04	2	1	6.65437733412511	0	0.000111111111111062	0.0192111111111111	0	0	0.000457765667574729	0.0322031042128602	0
0.01	-0.5	2	1e-05	1e-04	2	1	6.04778783564024	0	0	0.421677777777778	0	0	0	0.445961855910469	0
0.05	-0.5	2	1e-05	1e-04	2	1	6.38277009599756	0	0	0.134533333333333	0	0	0	0.159166197183099	0
0.005	1	2	1e-05	1e-04	2	1	4.1555907433516	4.44444444444444e-05	0.0338000000000001	0.212788888888889	4.44444444444025e-05	4.84965119076257e-05	0.0486256898192199	0.239328142821721	4.84615384614928e-05
0.01	1	2	1e-05	1e-04	2	1	4.84366241327474	0	0.00434444444444448	0.184622222222222	0	0	0.00822127659574476	0.210678339622642	0
0.05	1	2	1e-05	1e-04	2	1	5.42309118794686	0	0	0.675566666666667	0	0	0	0.692200225886605	0
0.005	-1.5	10	1e-05	1e-04	2	1	6.12021643247425	0	0.139	3.33333333333297e-05	0	0	0.164622454308094	0.000579310344827522	0
0.01	-1.5	10	1e-05	1e-04	2	1	6.47330584204007	0	0.0068111111111111	0.000766666666666693	0	0	0.0118417784591797	0.00347412587412599	0
0.05	-1.5	10	1e-05	1e-04	2	1	6.38277009599756	0	0.0400666666666667	5.55555555555864e-05	0	0	0.0566862488306829	0.000759036144578735	0
0.005	-0.5	10	1e-05	1e-04	2	1	5.93009136578496	0	0.00225555555555557	0.0203888888888889	0	0	0.00479662447257386	0.0337532846715329	0
0.01	-0.5	10	1e-05	1e-04	2	1	5.75807344830418	0	0.00182222222222217	0.0368222222222222	0	0	0.00404581497797345	0.0539140090380891	0
0.05	-0.5	10	1e-05	1e-04	2	1	5.93009136578496	0	0.000355555555555553	0.0712	0	0	0.00105618860510805	0.0913357466063349	0
0.005	1	10	1e-05	1e-04	2	1	3.34982260357319	0.00186666666666667	0.783766666666667	0.0177	0.00180000000000002	0.00196774343481292	0.828160968793666	0.0302286144578314	0.00189746688356963
0.01	1	10	1e-05	1e-04	2	1	2.84282242573508	0.0111444444444444	0.770811111111111	0.078	0.0109111111111111	0.0114836892321672	0.826087128712871	0.0986361862280457	0.0112458077709611
0.05	1	10	1e-05	1e-04	2	1	4.1736978925601	3.33333333333333e-05	0.1279	0.0628222222222222	3.33333333333297e-05	3.64864864864865e-05	0.154009662861694	0.0832004671532847	3.64776839565702e-05
0.005	-1.5	2	0	0.001	2	1	6.88071669923141	0	0.000355555555555553	0.00325555555555557	0	0	0.00105618860510805	0.00861061224489799	0
0.01	-1.5	2	0	0.001	2	1	7.11610963894196	0	0.000333333333333297	0.00149999999999995	0	0	0.00101612903225795	0.00504747774480694	0
0.05	-1.5	2	0	0.001	2	1	6.89882384843991	0	0.000133333333333319	0.00511111111111107	0	0	0.000519587628865922	0.0119014373716631	0
0.005	-0.5	2	0	0.001	2	1	6.47330584204007	0	3.33333333333297e-05	0.0555333333333333	0	0	0.000196108949416321	0.075104114490161	0
0.01	-0.5	2	0	0.001	2	1	6.12021643247425	0	0	0.341266666666667	0	0	0	0.365694684620836	0
0.05	-0.5	2	0	0.001	2	1	6.40087724520606	0	1.11111111110729e-05	0.126477777777778	0	0	8.78048780484784e-05	0.15053875623196	0
0.005	1	2	0	0.001	2	1	5.54984123240639	0	0.0536	0.0024777777777778	0	0	0.0728150943396226	0.00702011242973148	0
0.01	1	2	0	0.001	2	1	5.44119833715536	0	0.00608888888888892	0.0368222222222222	0	0	0.0108183313748532	0.0539140090380891	0
0.05	1	2	0	0.001	2	1	5.81239489592969	0	2.22222222222568e-05	0.212533333333333	0	0	0.000147584187408721	0.2391	0
0.005	-1.5	10	0	0.001	2	1	6.14737715628701	0	0.147666666666667	0	0	0	0.172900361383583	0	0
0.01	-1.5	10	0	0.001	2	1	6.51857371506133	0	0.00790000000000002	0.000588888888888861	0	0	0.0133213382899629	0.00305979381443285	0
0.05	-1.5	10	0	0.001	2	1	6.3556093721848	0	0.0356888888888889	9.9999999999989e-05	0	0	0.0511322804801011	0.00101704035874428	0
0.005	-0.5	10	0	0.001	2	1	6.17453788009976	0	0.00402222222222226	0.00490000000000002	0	0	0.00771124260355037	0.01157625	0
0.01	-0.5	10	0	0.001	2	1	5.50457335938513	0	0.00386666666666668	0.0450888888888888	0	0	0.00744764331210195	0.0635280968643278	0
0.05	-0.5	10	0	0.001	2	1	6.01157353722323	0	0.000511111111111129	0.0462111111111111	0	0	0.00136617560400712	0.0647355157504632	0
0.005	1	10	0	0.001	2	1	3.63048341630499	0.000522222222222222	0.785633333333333	0.00742222222222222	0.000511111111111129	0.000557364705882353	0.828489466357308	0.0155794539565016	0.00054550588235296
0.01	1	10	0	0.001	2	1	2.11853645739493	0.0857666666666667	0.790755555555556	0.311111111111111	0.0842111111111111	0.0862993788819876	0.830485575364668	0.336160076226775	0.0847717709720373
0.05	1	10	0	0.001	2	1	3.6485905655135	0.000511111111111111	0.117933333333333	0.216388888888889	0.000499999999999945	0.00054589121732988	0.144462759924386	0.242655129789864	0.000533898305084687
0.005	-1.5	2	1e-05	0.001	2	1	6.76302022937613	0	0.000222222222222235	0.00792222222222227	0	0	0.000754491017964114	0.0163639344262296	0
0.01	-1.5	2	1e-05	0.001	2	1	7.11610963894196	0	0.000277777777777821	0.00149999999999995	0	0	0.000896159317212089	0.00504747774480694	0
0.05	-1.5	2	1e-05	0.001	2	1	6.80828810239739	0	0.000177777777777832	0.0103666666666666	0	0	0.000638479809976443	0.0200013611229264	0
0.005	-0.5	2	1e-05	0.001	2	1	6.17453788009976	0	1.11111111110729e-05	0.203666666666667	0	0	8.78048780484784e-05	0.230497005988024	0
0.01	-0.5	2	1e-05	0.001	2	1	6.22885932772527	0	1.11111111110729e-05	0.236255555555556	0	0	8.78048780484784e-05	0.262018386308068	0
0.05	-0.5	2	1e-05	0.001	2	1	6.57289516268685	0	1.11111111110729e-05	0.0562888888888889	0	0	8.78048780484784e-05	0.0758996432818074	0
0.005	1	2	1e-05	0.001	2	1	5.1152696514023	0	0.0537444444444445	0.0119555555555556	0	0	0.0729676144866807	0.0222986842105264	0
0.01	1	2	1e-05	0.001	2	1	5.24201969586182	0	0.00445555555555555	0.0789888888888889	0	0	0.00840349272349271	0.0998032311977716	0
0.05	1	2	1e-05	0.001	2	1	5.16959109902781	0	1.11111111110729e-05	0.7984	0	0	8.78048780484784e-05	0.809826118067979	0
0.005	-1.5	10	1e-05	0.001	2	1	6.07494855945299	0	0.127611111111111	2.22222222222568e-05	0	0	0.153825139516343	0.000473239436620454	0
0.01	-1.5	10	1e-05	0.001	2	1	6.3556093721848	0	0.00446666666666662	0.0024777777777778	0	0	0.00841744910677183	0.00702011242973148	0
0.05	-1.5	10	1e-05	0.001	2	1	6.43709154362307	0	0.0465777777777778	7.77777777777322e-05	0	0	0.064729411764706	0.000902301790280801	0
0.005	-0.5	10	1e-05	0.001	2	1	5.63132340384465	0	0.00148888888888887	0.0596222222222222	0	0	0.0034160849772382	0.0795430588235294	0
0.01	-0.5	10	1e-05	0.001	2	1	5.73091272449142	0	0.00137777777777781	0.0452555555555556	0	0	0.00318207739307543	0.0636524651162791	0
0.05	-0.5	10	1e-05	0.001	2	1	6.21980575312102	0	0.0010444444444444	0.0156333333333334	0	0	0.00248432092291548	0.0274855813953489	0
0.005	1	10	1e-05	0.001	2	1	3.50373337184547	0.00103333333333333	0.775544444444444	0.0118	0.00102222222222226	0.00109590834697218	0.827474649204864	0.0220811881188119	0.0010836176676794
0.01	1	10	1e-05	0.001	2	1	3.1959118353009	0.00338888888888889	0.673944444444444	0.0461	0.00334444444444448	0.00354765751211632	0.754073014306857	0.0646197775030903	0.00350032302722662
0.05	1	10	1e-05	0.001	2	1	2.90619744796484	0.00854444444444444	0.121055555555556	0.610444444444444	0.0082888888888889	0.00884069343065693	0.147649368109707	0.629312727272727	0.00858215019401964
0.005	-1.5	2	1e-04	0.001	2	1	6.53668086426984	0	0	0.0318666666666667	0	0	0	0.0480223255813954	0
0.01	-1.5	2	1e-04	0.001	2	1	6.96219887066967	0	0.000133333333333319	0.00552222222222221	0	0	0.000519587628865922	0.012593665158371	0
0.05	-1.5	2	1e-04	0.001	2	1	6.90787742304416	0	0.000188888888888905	0.00492222222222227	0	0	0.000671473354232033	0.0115985454545456	0
0.005	-0.5	2	1e-04	0.001	2	1	6.17453788009976	0	1.11111111110729e-05	0.204522222222222	0	0	8.78048780484784e-05	0.231292146596859	0
0.01	-0.5	2	1e-04	0.001	2	1	6.03873426103599	0	0	0.432022222222222	0	0	0	0.456476310272537	0
0.05	-0.5	2	1e-04	0.001	2	1	6.21980575312102	0	0	0.257422222222222	0	0	0	0.283070836363636	0
0.005	1	2	1e-04	0.001	2	1	5.10621607679805	0	0.0329666666666667	0.0203111111111111	0	0	0.0475474721780605	0.0336613810741687	0
0.01	1	2	1e-04	0.001	2	1	5.16959109902781	0	0.00574444444444444	0.0804222222222222	0	0	0.0103277051129608	0.101275735702388	0
0.05	1	2	1e-04	0.001	2	1	5.34160901650859	0	0	0.673477777777778	0	0	0	0.690215815634885	0
0.005	-1.5	10	1e-04	0.001	2	1	6.18359145470402	0	0.160088888888889	1.11111111110729e-05	0	0	0.1855771019678	0.000359999999998761	0
0.01	-1.5	10	1e-04	0.001	2	1	6.43709154362307	0	0.00596666666666668	0.00103333333333333	0	0	0.0106470495672699	0.00406169844020796	0
0.05	-1.5	10	1e-04	0.001	2	1	6.41898439441456	0	0.0442	8.88888888889161e-05	0	0	0.0617656192236599	0.000955450236967117	0
0.005	-0.5	10	1e-04	0.001	2	1	6.27412720074653	0	0.0061444444444444	0.00258888888888886	0	0	0.0108914419695193	0.00728034717916918	0
0.01	-0.5	10	1e-04	0.001	2	1	5.83050204513819	0	0.00245555555555554	0.0243555555555556	0	0	0.00513053892215567	0.0387094604064471	0
0.05	-0.5	10	1e-04	0.001	2	1	6.13832358168276	0	0.000600000000000045	0.0229333333333334	0	0	0.0015472427515635	0.0369934566145093	0
0.005	1	10	1e-04	0.001	2	1	2.30866152408422	0.0525111111111111	0.836388888888889	0.189022222222222	0.0511444444444444	0.0531556349029235	0.84847137745975	0.215158042659975	0.0518068780705672
0.01	1	10	1e-04	0.001	2	1	3.26834043213492	0.00255555555555556	0.718188888888889	0.0324	0.00248888888888887	0.0026845761926818	0.795532307692308	0.0485197755034665	0.002614543770264
0.05	1	10	1e-04	0.001	2	1	4.50868015291742	0	0.115122222222222	0.0278	0	0	0.141773941368078	0.0430672131147542	0
0.005	-1.5	2	0	0.01	2	1	6.75396665477188	0	0.000111111111111062	0.00788888888888883	0	0	0.000457765667574729	0.0163099361896079	0
0.01	-1.5	2	0	0.01	2	1	6.97125244527393	0	5.55555555555864e-05	0.0047666666666667	0	0	0.000276013143483176	0.0113678233438487	0
0.05	-1.5	2	0	0.01	2	1	6.99841316908668	0	0.000288888888888894	0.00264444444444445	0	0	0.000922816901408467	0.00740444444444446	0
0.005	-0.5	2	0	0.01	2	1	6.1292700070785	0	0	0.2417	0	0	0	0.267467967797024	0
0.01	-0.5	2	0	0.01	2	1	6.34655579758055	0	0	0.150044444444444	0	0	0	0.174916885119507	0
0.05	-0.5	2	0	0.01	2	1	6.24696647693378	0	0	0.233644444444444	0	0	0	0.259743396226415	0
0.005	1	2	0	0.01	2	1	4.96135888313002	0	0.0406	0.0257222222222222	0	0	0.0573533478667081	0.0404282744282744	0
0.01	1	2	0	0.01	2	1	5.87576991815945	0	0.0108111111111111	0.00561111111111112	0	0	0.0171766024518389	0.0127451176765148	0
0.05	1	2	0	0.01	2	1	5.8848234927637	0	0.000111111111111062	0.150166666666667	0	0	0.000457765667574729	0.174995324942204	0
0.005	-1.5	10	0	0.01	2	1	6.14737715628701	0	0.155588888888889	2.22222222222568e-05	0	0	0.180915457574981	0.000473239436620454	0
0.01	-1.5	10	0	0.01	2	1	6.56384158808259	0	0.00954444444444447	0.00044444444444447	0	0	0.0154124599501602	0.00260129032258079	0
0.05	-1.5	10	0	0.01	2	1	6.31034149916354	0	0.0381777777777778	0.000166666666666648	0	0	0.0543036688617121	0.00139483394833933	0
0.005	-0.5	10	0	0.01	2	1	6.05684141024449	0	0.00434444444444448	0.00851111111111114	0	0	0.00822127659574476	0.0173038495971352	0
0.01	-0.5	10	0	0.01	2	1	5.68564485147016	0	0.00171111111111111	0.0504555555555556	0	0	0.00384618434093161	0.0693534545454546	0
0.05	-0.5	10	0	0.01	2	1	6.18359145470402	0	0.000944444444444414	0.0169	0	0	0.00226666666666659	0.0291366020524516	0
0.005	1	10	0	0.01	2	1	3.53994767026247	7e-04	0.7335	0.0125222222222222	0.000644444444444447	0.000744827586206897	0.807170305676856	0.0230709991876523	0.000686197183098595
0.01	1	10	0	0.01	2	1	2.94241174638185	0.00802222222222222	0.814177777777778	0.0494444444444444	0.0077666666666667	0.00830604884729514	0.834789873417721	0.0683155650319829	0.00804512445763876
0.05	1	10	0	0.01	2	1	4.00167997507932	5.55555555555556e-05	0.133777777777778	0.0917555555555556	5.55555555555864e-05	6.05042016806723e-05	0.159688421052632	0.113592576419214	6.04751619870747e-05
0.005	-1.5	2	1e-05	0.01	2	1	6.8445024008144	0	0.000477777777777799	0.00472222222222218	0	0	0.00130162162162168	0.0112974683544303	0
0.01	-1.5	2	1e-05	0.01	2	1	6.92598457225267	0	0.000111111111111062	0.00668888888888886	0	0	0.000457765667574729	0.0144411232746311	0
0.05	-1.5	2	1e-05	0.01	2	1	6.78112737858464	0	4.44444444444025e-05	0.0113888888888889	0	0	0.00023773584905638	0.0214891846921797	0
0.005	-0.5	2	1e-05	0.01	2	1	6.14737715628701	0	2.22222222222568e-05	0.226966666666667	0	0	0.000147584187408721	0.253140103270224	0
0.01	-0.5	2	1e-05	0.01	2	1	5.92103779118071	0	0	0.575388888888889	0	0	0	0.595067031463748	0
0.05	-0.5	2	1e-05	0.01	2	1	6.46425226743582	0	0	0.0965333333333334	0	0	0	0.118440681633757	0
0.005	1	2	1e-05	0.01	2	1	4.49057300370892	1.11111111111111e-05	0.0667333333333333	0.0578111111111111	0	1.23287671232877e-05	0.0883691768826621	0.0776521172638437	0
0.01	1	2	1e-05	0.01	2	1	5.1152696514023	0	0.00658888888888887	0.0800999999999999	0	0	0.0115216653816499	0.100954042789664	0
0.05	1	2	1e-05	0.01	2	1	5.58605553082339	0	2.22222222222568e-05	0.471255555555556	0	0	0.000147584187408721	0.494017841460596	0
0.005	-1.5	10	1e-05	0.01	2	1	6.05684141024449	0	0.126966666666667	1.11111111110729e-05	0	0	0.153170425531915	0.000359999999998761	0
0.01	-1.5	10	1e-05	0.01	2	1	6.41898439441456	0	0.00556666666666672	0.00132222222222222	0	0	0.0100599203187252	0.00467102803738319	0
0.05	-1.5	10	1e-05	0.01	2	1	6.28318077535079	0	0.0314444444444445	0.000288888888888894	0	0	0.0455693290734825	0.00192705882352945	0
0.005	-0.5	10	1e-05	0.01	2	1	6.10210928326575	0	0.00329999999999997	0.00731111111111116	0	0	0.00651100478468894	0.0154247441860466	0
0.01	-0.5	10	1e-05	0.01	2	1	6.08400213405725	0	0.0044777777777778	0.00678888888888884	0	0	0.00843138231631387	0.0145945023696682	0
0.05	-0.5	10	1e-05	0.01	2	1	6.23791290232953	0	0.00106666666666666	0.0138333333333334	0	0	0.00253186813186812	0.0249594272076373	0
0.005	1	10	1e-05	0.01	2	1	3.01484034321587	0.00646666666666667	0.791766666666667	0.0454555555555556	0.0062444444444445	0.00671231121281464	0.830970291531698	0.0638941431670282	0.00648461538461544
0.01	1	10	1e-05	0.01	2	1	3.53994767026247	0.000788888888888889	0.854655555555556	0.00570000000000004	0.000788888888888839	0.000838818565400844	0.861301399688958	0.0128953615960101	0.000838425492033687
0.05	1	10	1e-05	0.01	2	1	3.74817988616027	0.000466666666666667	0.0977	0.2143	0.000433333333333286	0.000498774740810556	0.124380353634578	0.240669670710572	0.000463257129389532
0.005	-1.5	2	1e-04	0.01	2	1	6.59100231189535	0	0.000111111111111062	0.0242444444444444	0	0	0.000457765667574729	0.0385734128376008	0
0.01	-1.5	2	1e-04	0.01	2	1	6.98030601987818	0	0.000155555555555575	0.00407777777777774	0	0	0.000578835110746587	0.0101686641011544	0
0.05	-1.5	2	1e-04	0.01	2	1	6.91693099764842	0	0.000222222222222235	0.00492222222222227	0	0	0.000754491017964114	0.0115985454545456	0
0.005	-0.5	2	1e-04	0.01	2	1	6.30128792455929	0	0	0.122222222222222	0	0	0	0.145894736842105	0
0.01	-0.5	2	1e-04	0.01	2	1	6.28318077535079	0	0	0.193266666666667	0	0	0	0.219713684210526	0
0.05	-0.5	2	1e-04	0.01	2	1	6.36466294678905	0	1.11111111110729e-05	0.148011111111111	0	0	8.78048780484784e-05	0.172812972972973	0
0.005	1	2	1e-04	0.01	2	1	5.16053752442356	0	0.0488222222222222	0.0107222222222222	0	0	0.0673328063241107	0.0205301815111861	0
0.01	1	2	1e-04	0.01	2	1	4.61732304816845	1.11111111111111e-05	0.0029555555555556	0.324955555555556	1.11111111110729e-05	1.23287671232877e-05	0.00594255319148945	0.349620113851992	1.23257520175658e-05
0.05	1	2	1e-04	0.01	2	1	5.48646621017662	0	1.11111111110729e-05	0.558777777777778	0	0	8.78048780484784e-05	0.578811600822105	0
0.005	-1.5	10	1e-04	0.01	2	1	5.8667163435552	0	0.114833333333333	0.000133333333333319	0	0	0.141583038869258	0.00122926829268279	0
0.01	-1.5	10	1e-04	0.01	2	1	6.52762728966559	0	0.00792222222222227	0.000566666666666715	0	0	0.0133290801186945	0.00300631578947394	0
0.05	-1.5	10	1e-04	0.01	2	1	5.94819851499347	0	0.0306555555555555	0.00108888888888892	0	0	0.044597049390635	0.00415757575757587	0
0.005	-0.5	10	1e-04	0.01	2	1	5.98441281341047	0	0.00244444444444447	0.0145333333333333	0	0	0.0051120331950208	0.0259744680851063	0
0.01	-0.5	10	1e-04	0.01	2	1	6.10210928326575	0	0.00477777777777777	0.00580000000000003	0	0	0.00890020533880902	0.0130564764267991	0
0.05	-0.5	10	1e-04	0.01	2	1	6.16548430549551	0	0.00072222222222218	0.0189888888888889	0	0	0.00180098955470028	0.0319486646884274	0
0.005	1	10	1e-04	0.01	2	1	3.63048341630499	0.000388888888888889	0.7859	0.00701111111111108	0.00037777777777781	0.00041623407267579	0.828489466357308	0.0149236977944626	0.000404246284501096
0.01	1	10	1e-04	0.01	2	1	2.16380433041619	0.0763444444444445	0.8717	0.217355555555556	0.0745222222222223	0.0769039307128581	0.874785663716814	0.243558498023715	0.0751017107309487
0.05	1	10	1e-04	0.01	2	1	3.63048341630499	0.000455555555555556	0.0592666666666667	0.358622222222222	0.00044444444444447	0.000487013905255715	0.0792551886792453	0.383386848927645	0.000475023562676747
0.005	-1.5	2	0.001	0.01	2	1	6.85355597541865	0	0.000255555555555564	0.0041444444444444	0	0	0.00083817787418658	0.0102503816793892	0
0.01	-1.5	2	0.001	0.01	2	1	7.01652031829519	0	9.9999999999989e-05	0.00304444444444441	0	0	0.00042832861189797	0.00822979737783065	0
0.05	-1.5	2	0.001	0.01	2	1	6.94409172146117	0	0.000222222222222235	0.00415555555555558	0	0	0.000754491017964114	0.0102666666666667	0
0.005	-0.5	2	0.001	0.01	2	1	6.18359145470402	0	1.11111111110729e-05	0.1971	0	0	8.78048780484784e-05	0.2235114	0
0.01	-0.5	2	0.001	0.01	2	1	6.30128792455929	0	0	0.181966666666667	0	0	0	0.208066750693219	0
0.05	-0.5	2	0.001	0.01	2	1	6.19264502930827	0	0	0.2819	0	0	0	0.307453330127435	0
0.005	1	2	0.001	0.01	2	1	5.3597161657171	0	0.0544111111111111	0.00521111111111117	0	0	0.073784394618834	0.0120538500764917	0
0.01	1	2	0.001	0.01	2	1	4.6625909211897	1.11111111111111e-05	0.00380000000000003	0.275333333333333	1.11111111110729e-05	1.23287671232877e-05	0.00733168864313063	0.300870151770658	1.23257520175658e-05
0.05	1	2	0.001	0.01	2	1	5.78523417211693	0	3.33333333333297e-05	0.233688888888889	0	0	0.000196108949416321	0.259743396226415	0
0.005	-1.5	10	0.001	0.01	2	1	6.19264502930827	0	0.160788888888889	1.11111111110729e-05	0	0	0.186150689127106	0.000359999999998761	0
0.01	-1.5	10	0.001	0.01	2	1	6.48235941664433	0	0.00715555555555558	0.000888888888888939	0	0	0.01230386656558	0.00376822429906563	0
0.05	-1.5	10	0.001	0.01	2	1	6.06589498484874	0	0.0367111111111111	0.00041111111111114	0	0	0.052431234256927	0.00246015831134582	0
0.005	-0.5	10	0.001	0.01	2	1	5.45930548636387	0	0.0024777777777778	0.0592666666666667	0	0	0.00517220432581689	0.0792551886792453	0
0.01	-0.5	10	0.001	0.01	2	1	5.72185914988717	0	0.00249999999999995	0.0322777777777777	0	0	0.00521139705882342	0.0484166666666666	0
0.05	-0.5	10	0.001	0.01	2	1	6.16548430549551	0	0.00103333333333333	0.0197333333333334	0	0	0.00246047244094488	0.0328719794344474	0
0.005	1	10	0.001	0.01	2	1	3.28644758134342	0.00236666666666667	0.697111111111111	0.0339777777777778	0.00229999999999997	0.0024884561891516	0.777883394833948	0.0503999999999999	0.00241835883171068
0.01	1	10	0.001	0.01	2	1	2.86092957494359	0.0107777777777778	0.828433333333333	0.0573111111111111	0.0105555555555555	0.0111159618008186	0.842361264290518	0.0770489626556016	0.0108892426654537
0.05	1	10	0.001	0.01	2	1	4.55394802593868	0	0.106233333333333	0.0275666666666666	0	0	0.133114475138121	0.0427641586867304	0
0.005	-1.5	2	0	0.1	2	1	6.53668086426984	0	4.44444444444025e-05	0.0323888888888889	0	0	0.00023773584905638	0.0485197755034665	0
0.01	-1.5	2	0	0.1	2	1	7.07989534052495	0	0.000222222222222235	0.00209999999999999	0	0	0.000754491017964114	0.00627509881422922	0
0.05	-1.5	2	0	0.1	2	1	6.76302022937613	0	6.66666666666593e-05	0.0135999999999999	0	0	0.000318315789473649	0.0246265868263472	0
0.005	-0.5	2	0	0.1	2	1	6.05684141024449	0	0	0.308222222222222	0	0	0	0.333276758045292	0
0.01	-0.5	2	0	0.1	2	1	6.10210928326575	0	0	0.316988888888889	0	0	0	0.341697148288973	0
0.05	-0.5	2	0	0.1	2	1	6.6000558864996	0	1.11111111110729e-05	0.0487777777777778	0	0	8.78048780484784e-05	0.0676416997859982	0
0.005	1	2	0	0.1	2	1	4.1374835941431	4.44444444444444e-05	0.0375777777777778	0.206366666666667	4.44444444444025e-05	4.84965119076257e-05	0.0535341708542714	0.232971428571429	4.84615384614928e-05
0.01	1	2	0	0.1	2	1	4.9070374355045	0	0.00313333333333332	0.185866666666667	0	0	0.00625013192612135	0.21199175257732	0
0.05	1	2	0	0.1	2	1	5.66753770226166	0	1.11111111110729e-05	0.390855555555556	0	0	8.78048780484784e-05	0.415885714285714	0
0.005	-1.5	10	0	0.1	2	1	6.10210928326575	0	0.133133333333333	0	0	0	0.159002843601896	0	0
0.01	-1.5	10	0	0.1	2	1	6.57289516268685	0	0.00936666666666663	0.000288888888888894	0	0	0.0151848463187991	0.00192705882352945	0
0.05	-1.5	10	0	0.1	2	1	6.24696647693378	0	0.0266444444444445	0.000333333333333297	0	0	0.0391510204081633	0.00212061711079921	0
0.005	-0.5	10	0	0.1	2	1	6.02062711182748	0	0.00314444444444439	0.0124888888888889	0	0	0.00626678383128285	0.0230282926829268	0
0.01	-0.5	10	0	0.1	2	1	5.96630566420197	0	0.00343333333333329	0.0123555555555556	0	0	0.00673598615916946	0.0228288391038697	0
0.05	-0.5	10	0	0.1	2	1	5.98441281341047	0	0.000677777777777777	0.0429222222222222	0	0	0.001708	0.0609914187284686	0
0.005	1	10	0	0.1	2	1	2.89714387336059	0.0100333333333333	0.786477777777778	0.0635555555555556	0.00975555555555552	0.0103505117125313	0.828489466357308	0.083877800407332	0.0100685324232082
0.01	1	10	0	0.1	2	1	3.63953699090924	0.000577777777777778	0.746466666666667	0.00903333333333334	0.000544444444444458	0.000615644820295983	0.813153890489913	0.018082612533098	0.000580126849894307
0.05	1	10	0	0.1	2	1	3.45846549882421	0.000966666666666667	0.111411111111111	0.313088888888889	0.000933333333333342	0.00102568421052632	0.138152214324768	0.338127493453939	0.000990315789473693
0.005	-1.5	2	1e-05	0.1	2	1	6.75396665477188	0	0.000122222222222246	0.0082444444444445	0	0	0.000488028169014179	0.0169063291139242	0
0.01	-1.5	2	1e-05	0.1	2	1	6.81734167700164	0	7.77777777777322e-05	0.0131888888888889	0	0	0.000355287009063236	0.0240937575513492	0
0.05	-1.5	2	1e-05	0.1	2	1	6.68153805793787	0	6.66666666666593e-05	0.0223666666666666	0	0	0.000318315789473649	0.036311811023622	0
0.005	-0.5	2	1e-05	0.1	2	1	6.05684141024449	0	0	0.256633333333333	0	0	0	0.282271774975752	0
0.01	-0.5	2	1e-05	0.1	2	1	5.93009136578496	0	0	0.565733333333333	0	0	0	0.585481724845996	0
0.05	-0.5	2	1e-05	0.1	2	1	6.0930557086615	0	0	0.3846	0	0	0	0.409517746478873	0
0.005	1	2	1e-05	0.1	2	1	5.36876974032135	0	0.0479333333333334	0.00616666666666665	0	0	0.0663489777235277	0.0135984443364122	0
0.01	1	2	1e-05	0.1	2	1	4.68975164500246	0	0.00298888888888893	0.303322222222222	0	0	0.00599363395225472	0.328448221532585	0
0.05	1	2	1e-05	0.1	2	1	5.76712702290843	0	3.33333333333297e-05	0.246466666666667	0	0	0.000196108949416321	0.272135474452555	0
0.005	-1.5	10	1e-05	0.1	2	1	6.1292700070785	0	0.141744444444444	3.33333333333297e-05	0	0	0.167261394380853	0.000579310344827522	0
0.01	-1.5	10	1e-05	0.1	2	1	6.5819487372911	0	0.00942222222222222	0.000311111111111151	0	0	0.0152585505176723	0.00202467718794861	0
0.05	-1.5	10	1e-05	0.1	2	1	6.19264502930827	0	0.0340666666666667	0.000366666666666626	0	0	0.0489782567353408	0.00226285714285689	0
0.005	-0.5	10	1e-05	0.1	2	1	5.93914494038922	0	0.00353333333333339	0.0122555555555556	0	0	0.00689045571797087	0.0227181038005722	0
0.01	-0.5	10	1e-05	0.1	2	1	5.56794838161489	0	0.00183333333333335	0.0599	0	0	0.00406054687500004	0.0798666666666666	0
0.05	-0.5	10	1e-05	0.1	2	1	6.05684141024449	0	0.000911111111111085	0.0257555555555555	0	0	0.00220415999999994	0.0404666435746449	0
0.005	1	10	1e-05	0.1	2	1	3.39509047659444	0.00135555555555556	0.759633333333333	0.0171444444444444	0.00134444444444448	0.00143295269168026	0.82117840665874	0.0294684350132625	0.00142021425244531
0.01	1	10	1e-05	0.1	2	1	3.47657264803271	0.00115555555555556	0.8504	0.0083333333333333	0.00114444444444439	0.00122381508288583	0.858751401869159	0.0170500676589986	0.0012117647058823
0.05	1	10	1e-05	0.1	2	1	4.85271598787899	0	0.119033333333333	0.00956666666666661	0	0	0.14561359223301	0.0188753371030882	0
0.005	-1.5	2	1e-04	0.1	2	1	6.5819487372911	0	4.44444444444025e-05	0.0247777777777778	0	0	0.00023773584905638	0.0392430167597766	0
0.01	-1.5	2	1e-04	0.1	2	1	6.92598457225267	0	0.000111111111111062	0.00658888888888887	0	0	0.000457765667574729	0.0143000956937799	0
0.05	-1.5	2	1e-04	0.1	2	1	6.93503814685692	0	0.000177777777777832	0.00356666666666672	0	0	0.000638479809976443	0.00920273037542675	0
0.005	-0.5	2	1e-04	0.1	2	1	6.03873426103599	0	0	0.326788888888889	0	0	0	0.351342593031524	0
0.01	-0.5	2	1e-04	0.1	2	1	5.8848234927637	0	0	0.622322222222222	0	0	0	0.640974931880109	0
0.05	-0.5	2	1e-04	0.1	2	1	6.21075217851677	0	1.11111111110729e-05	0.265033333333333	0	0	8.78048780484784e-05	0.290524697921701	0
0.005	1	2	1e-04	0.1	2	1	5.35066259111284	0	0.0482555555555556	0.00594444444444442	0	0	0.0666729211087421	0.0132814159292036	0
0.01	1	2	1e-04	0.1	2	1	5.71280557528292	0	0.00978888888888885	0.0107444444444444	0	0	0.0157009900990098	0.0205553774778574	0
0.05	1	2	1e-04	0.1	2	1	5.70375200067867	0	2.22222222222568e-05	0.3043	0	0	0.000147584187408721	0.329349749463135	0
0.005	-1.5	10	1e-04	0.1	2	1	5.61321625463615	0	0.0998555555555556	0.000566666666666715	0	0	0.126733296026861	0.00300631578947394	0
0.01	-1.5	10	1e-04	0.1	2	1	6.3737165213933	0	0.00602222222222226	0.00175555555555551	0	0	0.0107335166994107	0.00559213483146053	0
0.05	-1.5	10	1e-04	0.1	2	1	6.34655579758055	0	0.0345444444444445	0.000133333333333319	0	0	0.0496179860671312	0.00122926829268279	0
0.005	-0.5	10	1e-04	0.1	2	1	5.91198421657646	0	0.00194444444444442	0.0228444444444444	0	0	0.0042465093885411	0.0368762989323843	0
0.01	-0.5	10	1e-04	0.1	2	1	6.07494855945299	0	0.00473333333333337	0.00625555555555557	0	0	0.00882828947368427	0.0137144514258096	0
0.05	-0.5	10	1e-04	0.1	2	1	5.93914494038922	0	0.000488888888888872	0.0537888888888889	0	0	0.00132473118279565	0.0730716981132075	0
0.005	1	10	1e-04	0.1	2	1	2.11853645739493	0.0857333333333333	0.808111111111111	0.294933333333333	0.0836555555555556	0.0862849789216774	0.833082352941176	0.320205265677358	0.0842312097669257
0.01	1	10	1e-04	0.1	2	1	3.58521554328373	0.000555555555555556	0.745233333333333	0.0108111111111111	0.000533333333333386	0.000592105263157895	0.812786342870883	0.0206480842105263	0.000568421052631635
0.05	1	10	1e-04	0.1	2	1	4.10126929572609	3.33333333333333e-05	0.0962555555555555	0.101988888888889	3.33333333333297e-05	3.64864864864865e-05	0.122845569620253	0.124227067669173	3.64776839565702e-05
0.005	-1.5	2	0.001	0.1	2	1	6.42803796901882	0	0	0.0591666666666667	0	0	0	0.0791681415929204	0
0.01	-1.5	2	0.001	0.1	2	1	7.00746674369093	0	0.000211111111111162	0.00346666666666662	0	0	0.000728767123287846	0.00900618556701018	0
0.05	-1.5	2	0.001	0.1	2	1	6.98935959448243	0	0.000266666666666637	0.00271111111111111	0	0	0.000867096774193453	0.00752607099143206	0
0.005	-0.5	2	0.001	0.1	2	1	6.16548430549551	0	0	0.2103	0	0	0	0.237057852882704	0
0.01	-0.5	2	0.001	0.1	2	1	6.49141299124858	0	4.44444444444025e-05	0.0790444444444445	0	0	0.00023773584905638	0.0998456140350878	0
0.05	-0.5	2	0.001	0.1	2	1	6.5819487372911	0	0	0.0541666666666667	0	0	0	0.0735188509874327	0
0.005	1	2	0.001	0.1	2	1	4.73501951802372	0	0.0373333333333333	0.0538333333333333	0	0	0.0532193588937775	0.0731101796407185	0
0.01	1	2	0.001	0.1	2	1	5.29634114348733	0	0.00421111111111117	0.0758111111111112	0	0	0.00802925598991183	0.0964057190916737	0
0.05	1	2	0.001	0.1	2	1	5.38687688952985	0	0	0.635555555555556	0	0	0	0.65356608478803	0
0.005	-1.5	10	0.001	0.1	2	1	5.96630566420197	0	0.133844444444444	7.77777777777322e-05	0	0	0.159725966850829	0.000902301790280801	0
0.01	-1.5	10	0.001	0.1	2	1	6.47330584204007	0	0.00680000000000003	0.000977777777777744	0	0	0.0118269938650307	0.00392843224092103	0
0.05	-1.5	10	0.001	0.1	2	1	6.21075217851677	0	0.0257777777777778	0.00037777777777781	0	0	0.0380130039011704	0.00231567567567587	0
0.005	-0.5	10	0.001	0.1	2	1	5.98441281341047	0	0.00382222222222217	0.00896666666666668	0	0	0.00736516567544595	0.0179888544891641	0
0.01	-0.5	10	0.001	0.1	2	1	5.42309118794686	0	0.00174444444444444	0.0864	0	0	0.00390562685093779	0.107875144508671	0
0.05	-0.5	10	0.001	0.1	2	1	5.90293064197221	0	0.000322222222222224	0.0701333333333334	0	0	0.000995640326975482	0.0903250425894379	0
0.005	1	10	0.001	0.1	2	1	2.39919727012674	0.0429777777777778	0.797233333333333	0.185933333333333	0.0418444444444445	0.0435733571747877	0.831837353549276	0.212014479638009	0.0424527846119437
0.01	1	10	0.001	0.1	2	1	4.20991219097711	3.33333333333333e-05	0.730044444444444	0.00112222222222225	3.33333333333297e-05	3.64864864864865e-05	0.804734289185905	0.00422439834024905	3.64776839565702e-05
0.05	1	10	0.001	0.1	2	1	3.83871563220279	0.000233333333333333	0.109233333333333	0.156855555555556	0.000233333333333308	0.000250746268656716	0.136125679758308	0.181828980322004	0.000250568181818154
0.005	-1.5	2	0.01	0.1	2	1	6.1292700070785	0	2.22222222222568e-05	0.1775	0	0	0.000147584187408721	0.20321554770318	0
0.01	-1.5	2	0.01	0.1	2	1	6.96219887066967	0	0.000155555555555575	0.00523333333333331	0	0	0.000578835110746587	0.0120929190015282	0
0.05	-1.5	2	0.01	0.1	2	1	6.96219887066967	0	0.000222222222222235	0.00298888888888893	0	0	0.000754491017964114	0.00811346499102345	0
0.005	-0.5	2	0.01	0.1	2	1	5.99346638801473	0	0	0.330788888888889	0	0	0	0.355138082840237	0
0.01	-0.5	2	0.01	0.1	2	1	6.45519869283157	0	1.11111111110729e-05	0.0926444444444444	0	0	8.78048780484784e-05	0.114474312176519	0
0.05	-0.5	2	0.01	0.1	2	1	6.39182367060181	0	0	0.133055555555556	0	0	0	0.157458909470389	0
0.005	1	2	0.01	0.1	2	1	5.28728756888308	0	0.0548	0.00657777777777779	0	0	0.0742451612903225	0.0142828147438966	0
0.01	1	2	0.01	0.1	2	1	5.17864467363206	0	0.0134888888888889	0.0418666666666667	0	0	0.0207690427698574	0.0597380308273043	0
0.05	1	2	0.01	0.1	2	1	6.24696647693378	0	0.000222222222222235	0.0338444444444445	0	0	0.000754491017964114	0.0502679764243615	0
0.005	-1.5	10	0.01	0.1	2	1	5.75807344830418	0	0.0740444444444445	0.000622222222222191	0	0	0.0972677671589922	0.00314648829431422	0
0.01	-1.5	10	0.01	0.1	2	1	5.65848412765741	0	0.00198888888888893	0.0426777777777778	0	0	0.00432275994250128	0.0607202257761054	0
0.05	-1.5	10	0.01	0.1	2	1	6.30128792455929	0	0.0326333333333333	0.000144444444444392	0	0	0.0471416560509553	0.00127223300970827	0
0.005	-0.5	10	0.01	0.1	2	1	5.82144847053394	0	0.00202222222222226	0.0288111111111111	0	0	0.00437633587786267	0.0442557399254995	0
0.01	-0.5	10	0.01	0.1	2	1	5.79428774672119	0	0.00241111111111114	0.0298777777777778	0	0	0.00505864939870497	0.0456161561763716	0
0.05	-0.5	10	0.01	0.1	2	1	5.76712702290843	0	0.000644444444444447	0.0803222222222222	0	0	0.0016367301231803	0.101206	0
0.005	1	10	0.01	0.1	2	1	3.79344775918153	0.000222222222222222	0.770777777777778	0.00436666666666663	0.000211111111111162	0.000238975817923186	0.826087128712871	0.0106604951560817	0.00022713472485774
0.01	1	10	0.01	0.1	2	1	4.46341227989616	1.11111111111111e-05	0.649044444444444	0.00065555555555552	0	1.23287671232877e-05	0.728188374969082	0.00321470270270253	0
0.05	1	10	0.01	0.1	2	1	5.19675182284056	0	0.111177777777778	0.00313333333333332	0	0	0.13793829321663	0.00837031802120138	0
0.005	-1.5	2	0	0.5	2	1	6.72680593095913	0	9.9999999999989e-05	0.0101555555555556	0	0	0.00042832861189797	0.0196777445536096	0
0.01	-1.5	2	0	0.5	2	1	7.01652031829519	0	0.000155555555555575	0.00324444444444449	0	0	0.000578835110746587	0.00859626168224312	0
0.05	-1.5	2	0	0.5	2	1	6.92598457225267	0	0.000266666666666637	0.00461111111111112	0	0	0.000867096774193453	0.0111196172248804	0
0.005	-0.5	2	0	0.5	2	1	6.12021643247425	0	0	0.2509	0	0	0	0.276434879766821	0
0.01	-0.5	2	0	0.5	2	1	5.97535923880622	0	0	0.505822222222222	0	0	0	0.527450482758621	0
0.05	-0.5	2	0	0.5	2	1	6.46425226743582	0	1.11111111110729e-05	0.0956444444444444	0	0	8.78048780484784e-05	0.117631878557875	0
0.005	1	2	0	0.5	2	1	4.52678730212593	1.11111111111111e-05	0.0444666666666667	0.0773444444444444	1.11111111110729e-05	1.23287671232877e-05	0.0620808864265928	0.0979437185929648	1.23257520175658e-05
0.01	1	2	0	0.5	2	1	5.16053752442356	0	0.00534444444444448	0.0845111111111111	0	0	0.00972418772563184	0.105837217007178	0
0.05	1	2	0	0.5	2	1	5.19675182284056	0	1.11111111110729e-05	0.782022222222222	0	0	8.78048780484784e-05	0.793568859060403	0
0.005	-1.5	10	0	0.5	2	1	5.40498403873836	0	0.144533333333333	0.000755555555555509	0	0	0.170021576763485	0.00345483870967721	0
0.01	-1.5	10	0	0.5	2	1	5.89387706736796	0	0.00545555555555555	0.0103111111111112	0	0	0.00989460215913633	0.0199280783979549	0
0.05	-1.5	10	0	0.5	2	1	6.43709154362307	0	0.0455444444444445	7.77777777777322e-05	0	0	0.0633904878797178	0.000902301790280801	0
0.005	-0.5	10	0	0.5	2	1	5.93914494038922	0	0.0027666666666667	0.0157222222222222	0	0	0.00565297297297303	0.0276204492641363	0
0.01	-0.5	10	0	0.5	2	1	5.68564485147016	0	0.00155555555555553	0.0501333333333334	0	0	0.00354929577464783	0.0690151138088013	0
0.05	-0.5	10	0	0.5	2	1	6.14737715628701	0	0.000922222222222269	0.0175111111111111	0	0	0.00222747603833877	0.0299737358490567	0
0.005	1	10	0	0.5	2	1	2.40825084473099	0.0403777777777778	0.815633333333333	0.167955555555556	0.0393444444444444	0.0409831282166033	0.835795256381297	0.193068018246325	0.0399611285266457
0.01	1	10	0	0.5	2	1	2.9514653209861	0.00782222222222222	0.800777777777778	0.0500555555555555	0.00763333333333338	0.0081026718428865	0.832169199178645	0.0689498937139386	0.00790881681132942
0.05	1	10	0	0.5	2	1	3.65764414011775	0.000455555555555556	0.124566666666667	0.1967	0.000433333333333286	0.000487013905255715	0.150836732514682	0.223113578394599	0.000463257129389532
0.005	-1.5	2	1e-05	0.5	2	1	6.52762728966559	0	2.22222222222568e-05	0.0335666666666666	0	0	0.000147584187408721	0.0499207868852459	0
0.01	-1.5	2	1e-05	0.5	2	1	6.93503814685692	0	9.9999999999989e-05	0.00634444444444449	0	0	0.00042832861189797	0.0138824891461651	0
0.05	-1.5	2	1e-05	0.5	2	1	6.66343090872936	0	5.55555555555864e-05	0.0234777777777778	0	0	0.000276013143483176	0.0376574257425743	0
0.005	-0.5	2	1e-05	0.5	2	1	6.17453788009976	0	1.11111111110729e-05	0.205022222222222	0	0	8.78048780484784e-05	0.23174203837528	0
0.01	-0.5	2	1e-05	0.5	2	1	5.93914494038922	0	0	0.555788888888889	0	0	0	0.57624192	0
0.05	-0.5	2	1e-05	0.5	2	1	6.31034149916354	0	0	0.186266666666667	0	0	0	0.212341191254084	0
0.005	1	2	1e-05	0.5	2	1	4.40909083227065	1.11111111111111e-05	0.0304	0.128177777777778	1.11111111110729e-05	1.23287671232877e-05	0.0442536585365853	0.15224257659073	1.23257520175658e-05
0.01	1	2	1e-05	0.5	2	1	5.25107327046607	0	0.00649999999999995	0.0630444444444445	0	0	0.0114013921113688	0.0833538461538462	0
0.05	1	2	1e-05	0.5	2	1	5.35066259111284	0	1.11111111110729e-05	0.763744444444444	0	0	8.78048780484784e-05	0.776584801613988	0
0.005	-1.5	10	1e-05	0.5	2	1	5.74901987369993	0	0.105966666666667	0.000277777777777821	0	0	0.132890461708598	0.00189473684210556	0
0.01	-1.5	10	1e-05	0.5	2	1	6.13832358168276	0	0.00270000000000004	0.00852222222222221	0	0	0.00555680580762258	0.0173038495971352	0
0.05	-1.5	10	1e-05	0.5	2	1	6.26507362614228	0	0.0311444444444444	0.000266666666666637	0	0	0.0451923224568138	0.00184390243902419	0
0.005	-0.5	10	1e-05	0.5	2	1	6.07494855945299	0	0.00416666666666665	0.00773333333333337	0	0	0.00795789473684208	0.0160688960146588	0
0.01	-0.5	10	1e-05	0.5	2	1	5.8667163435552	0	0.00277777777777777	0.0210222222222223	0	0	0.00567056705670565	0.0345860869565217	0
0.05	-0.5	10	1e-05	0.5	2	1	6.27412720074653	0	0.00116666666666665	0.0115444444444445	0	0	0.00274623767514267	0.0216834782608696	0
0.005	1	10	1e-05	0.5	2	1	3.09632251465413	0.00467777777777778	0.779722222222222	0.0396666666666666	0.00445555555555555	0.00487219288174512	0.827474649204864	0.0572290076335877	0.0046439338235294
0.01	1	10	1e-05	0.5	2	1	3.25023328292642	0.00231111111111111	0.7407	0.0307444444444445	0.00221111111111116	0.00243173277661795	0.810811671087533	0.0466566744730679	0.00232651356993743
0.05	1	10	1e-05	0.5	2	1	4.11032287033034	4.44444444444444e-05	0.0858333333333333	0.1099	4.44444444444025e-05	4.84965119076257e-05	0.111271791940554	0.13272268370607	4.84615384614928e-05
0.005	-1.5	2	1e-04	0.5	2	1	6.70869878175062	0	0.000199999999999978	0.0114777777777778	0	0	0.000698921417565408	0.0216029875518673	0
0.01	-1.5	2	1e-04	0.5	2	1	6.77207380398039	0	5.55555555555864e-05	0.0183888888888889	0	0	0.000276013143483176	0.0311471247199403	0
0.05	-1.5	2	1e-04	0.5	2	1	6.75396665477188	0	9.9999999999989e-05	0.0149	0	0	0.00042832861189797	0.0264940807526461	0
0.005	-0.5	2	1e-04	0.5	2	1	5.92103779118071	0	0	0.459577777777778	0	0	0	0.483339856248551	0
0.01	-0.5	2	1e-04	0.5	2	1	5.72185914988717	0	0	0.818544444444444	0	0	0	0.829331605986151	0
0.05	-0.5	2	1e-04	0.5	2	1	6.40993081981031	0	0	0.122511111111111	0	0	0	0.146201104972376	0
0.005	1	2	1e-04	0.5	2	1	4.6263766227727	0	0.0350444444444444	0.0750333333333333	0	0	0.0503043037974683	0.0956042696629213	0
0.01	1	2	1e-04	0.5	2	1	4.30044793701963	1.11111111111111e-05	0.00429999999999997	0.464033333333333	1.11111111110729e-05	1.23287671232877e-05	0.00816100418410036	0.487347811993517	1.23257520175658e-05
0.05	1	2	1e-04	0.5	2	1	5.80334132132544	0	0.000111111111111062	0.206466666666667	0	0	0.000457765667574729	0.233026324956457	0
0.005	-1.5	10	1e-04	0.5	2	1	6.06589498484874	0	0.126777777777778	3.33333333333297e-05	0	0	0.153023948908994	0.000579310344827522	0
0.01	-1.5	10	1e-04	0.5	2	1	6.40087724520606	0	0.00594444444444442	0.00141111111111114	0	0	0.0106199291059472	0.00487123287671243	0
0.05	-1.5	10	1e-04	0.5	2	1	6.45519869283157	0	0.0469111111111111	4.44444444444025e-05	0	0	0.0650929336188437	0.000669767441859834	0
0.005	-0.5	10	1e-04	0.5	2	1	6.19264502930827	0	0.00470000000000004	0.00470000000000004	0	0	0.00878056013179579	0.0112621236133123	0
0.01	-0.5	10	1e-04	0.5	2	1	5.70375200067867	0	0.00239999999999996	0.0388222222222222	0	0	0.00504467099165885	0.0561894065092533	0
0.05	-0.5	10	1e-04	0.5	2	1	6.46425226743582	0	0.00227777777777782	0.00278888888888884	0	0	0.00483029453015437	0.00769021276595731	0
0.005	1	10	1e-04	0.5	2	1	2.76134025429682	0.0146777777777778	0.846222222222222	0.0664333333333333	0.0142444444444444	0.0150766304347826	0.8568	0.0867170071942446	0.014638151336656
0.01	1	10	1e-04	0.5	2	1	4.03789427349633	7.77777777777778e-05	0.755488888888889	0.00188888888888894	7.77777777777322e-05	8.43615494978479e-05	0.819243987568731	0.00589270976616247	8.43413817833596e-05
0.05	1	10	1e-04	0.5	2	1	3.82060848299428	0.000233333333333333	0.105455555555556	0.167444444444444	0.000222222222222235	0.000250746268656716	0.132630108123094	0.19252927756654	0.00023886255924172
0.005	-1.5	2	0.001	0.5	2	1	6.78112737858464	0	0.000199999999999978	0.0067666666666667	0	0	0.000698921417565408	0.014574358974359	0
0.01	-1.5	2	0.001	0.5	2	1	7.05273461671219	0	0.000199999999999978	0.0024777777777778	0	0	0.000698921417565408	0.00702011242973148	0
0.05	-1.5	2	0.001	0.5	2	1	6.80828810239739	0	0.000177777777777832	0.00978888888888885	0	0	0.000638479809976443	0.0191720207253885	0
0.005	-0.5	2	0.001	0.5	2	1	6.04778783564024	0	1.11111111110729e-05	0.267566666666667	0	0	8.78048780484784e-05	0.293137889398696	0
0.01	-0.5	2	0.001	0.5	2	1	5.97535923880622	0	0	0.473277777777778	0	0	0	0.495793995381062	0
0.05	-0.5	2	0.001	0.5	2	1	6.53668086426984	0	2.22222222222568e-05	0.0672222222222222	0	0	0.000147584187408721	0.0874698795180722	0
0.005	1	2	0.001	0.5	2	1	4.9070374355045	0	0.0345111111111112	0.0345111111111112	0	0	0.0495858093126386	0.0510404692082111	0
0.01	1	2	0.001	0.5	2	1	4.49057300370892	2.22222222222222e-05	0.0032888888888889	0.3984	2.22222222222568e-05	2.44541484716157e-05	0.00650039215686276	0.423317498243148	2.44541484716538e-05
0.05	1	2	0.001	0.5	2	1	5.45025191175962	0	0	0.572222222222222	0	0	0	0.591927023945268	0
0.005	-1.5	10	0.001	0.5	2	1	5.85766276895095	0	0.149466666666667	0.000133333333333319	0	0	0.174827436823105	0.00122926829268279	0
0.01	-1.5	10	0.001	0.5	2	1	6.21075217851677	0	0.00351111111111113	0.00611111111111107	0	0	0.00685301204819281	0.0135351562499999	0
0.05	-1.5	10	0.001	0.5	2	1	6.43709154362307	0	0.0444333333333333	6.66666666666593e-05	0	0	0.0620534482758621	0.000833057851239578	0
0.005	-0.5	10	0.001	0.5	2	1	5.73091272449142	0	0.00178888888888884	0.0388666666666667	0	0	0.00397764705882342	0.0562178571428572	0
0.01	-0.5	10	0.001	0.5	2	1	5.6222698292404	0	0.00177777777777777	0.0559888888888889	0	0	0.00396070726915518	0.0755400356930398	0
0.05	-0.5	10	0.001	0.5	2	1	6.15643073089126	0	0.00113333333333332	0.0154222222222222	0	0	0.00267332293291728	0.0271670679611651	0
0.005	1	10	0.001	0.5	2	1	2.61648306062879	0.0228222222222222	0.797955555555556	0.117188888888889	0.0221444444444444	0.0233419616685457	0.831837353549276	0.140690553056364	0.022658966839612
0.01	1	10	0.001	0.5	2	1	3.35887617817744	0.00157777777777778	0.872811111111111	0.00982222222222218	0.00151111111111113	0.00166437209302326	0.87570696748507	0.0192124191461836	0.00159404651162793
0.05	1	10	0.001	0.5	2	1	4.23707291478987	3.33333333333333e-05	0.115	0.0604111111111111	3.33333333333297e-05	3.64864864864865e-05	0.14175	0.0804535525543159	3.64776839565702e-05
0.005	-1.5	2	0.01	0.5	2	1	6.3556093721848	0	1.11111111110729e-05	0.0841444444444445	0	0	8.78048780484784e-05	0.105465377176016	0
0.01	-1.5	2	0.01	0.5	2	1	6.69059163254212	0	4.44444444444025e-05	0.0291888888888889	0	0	0.00023773584905638	0.0447451165934438	0
0.05	-1.5	2	0.01	0.5	2	1	6.22885932772527	0	1.11111111110729e-05	0.163722222222222	0	0	8.78048780484784e-05	0.188823798627002	0
0.005	-0.5	2	0.01	0.5	2	1	5.54984123240639	0	0	0.781888888888889	0	0	0	0.793568859060403	0
0.01	-0.5	2	0.01	0.5	2	1	5.77618059751268	0	0	0.740588888888889	0	0	0	0.754054141414141	0
0.05	-0.5	2	0.01	0.5	2	1	6.39182367060181	0	1.11111111110729e-05	0.104488888888889	0	0	8.78048780484784e-05	0.126999356913183	0
0.005	1	2	0.01	0.5	2	1	4.11032287033034	2.22222222222222e-05	0.0301333333333333	0.249644444444444	2.22222222222568e-05	2.44541484716157e-05	0.0438936416184971	0.275319037199125	2.44541484716538e-05
0.01	1	2	0.01	0.5	2	1	4.06505499730908	8.88888888888889e-05	0.002	0.7431	8.88888888889161e-05	9.62980654406496e-05	0.00433652007648184	0.756271393313888	9.62061560487052e-05
0.05	1	2	0.01	0.5	2	1	5.97535923880622	0	0.000122222222222246	0.1364	0	0	0.000488028169014179	0.16103606557377	0
0.005	-1.5	10	0.01	0.5	2	1	4.97946603233852	0	0.0977333333333333	0.00813333333333333	0	0	0.124387878787879	0.0167466182478438	0
0.01	-1.5	10	0.01	0.5	2	1	6.03873426103599	0	0.0029555555555556	0.0111333333333333	0	0	0.00594255319148945	0.0211212045169385	0
0.05	-1.5	10	0.01	0.5	2	1	6.28318077535079	0	0.0347111111111111	0.000177777777777832	0	0	0.0498415954415955	0.0014348754448403	0
0.005	-0.5	10	0.01	0.5	2	1	5.82144847053394	0	0.00215555555555558	0.0316777777777778	0	0	0.0046164305949009	0.0477853009644164	0
0.01	-0.5	10	0.01	0.5	2	1	5.68564485147016	0	0.0029555555555556	0.0349444444444444	0	0	0.00594255319148945	0.0514636363636364	0
0.05	-0.5	10	0.01	0.5	2	1	5.87576991815945	0	0.000355555555555553	0.0677	0	0	0.00105618860510805	0.08796539673446	0
0.005	1	10	0.01	0.5	2	1	3.07821536544563	0.00465555555555556	0.811688888888889	0.0341777777777778	0.00451111111111113	0.00485016077170418	0.834665943012212	0.0506304376224689	0.00469967845659166
0.01	1	10	0.01	0.5	2	1	3.1596975368839	0.00362222222222222	0.8664	0.0197777777777778	0.0034777777777778	0.00378755186721992	0.870044365729467	0.0329339207048458	0.0036365145228216
0.05	1	10	0.01	0.5	2	1	4.16464431795585	3.33333333333333e-05	0.156711111111111	0.0506444444444445	3.33333333333297e-05	3.64864864864865e-05	0.182080327868852	0.0694867513611616	3.64776839565702e-05
0.005	-1.5	2	0.1	0.5	2	1	4.81650168946199	0	0	0.945955555555556	2.22222222222568e-05	0	0	0.951198049213035	2.44541484716538e-05
0.01	-1.5	2	0.1	0.5	2	1	5.81239489592969	0	0	0.727855555555555	0	0	0	0.742300899280576	0
0.05	-1.5	2	0.1	0.5	2	1	6.12021643247425	0	2.22222222222568e-05	0.183822222222222	0	0	0.000147584187408721	0.209871029448779	0
0.005	-0.5	2	0.1	0.5	2	1	5.52268050859363	0	0	0.700233333333333	1.11111111110729e-05	0	0	0.715857200811359	1.23257520175658e-05
0.01	-0.5	2	0.1	0.5	2	1	5.68564485147016	0	0	0.854288888888889	0	0	0	0.863425668449198	0
0.05	-0.5	2	0.1	0.5	2	1	5.77618059751268	0	0	0.452122222222222	0	0	0	0.476161225911307	0
0.005	1	2	0.1	0.5	2	1	4.00167997507932	5.55555555555556e-05	0.0116666666666667	0.465677777777778	4.44444444444025e-05	6.05042016806723e-05	0.0183367983367984	0.488848507289979	4.84615384614928e-05
0.01	1	2	0.1	0.5	2	1	4.70785879421096	0	0.0032888888888889	0.288055555555556	0	0	0.00650039215686276	0.31378962536023	0
0.05	1	2	0.1	0.5	2	1	5.42309118794686	0	3.33333333333297e-05	0.419588888888889	0	0	0.000196108949416321	0.444063275781615	0
0.005	-1.5	10	0.1	0.5	2	1	4.4181444068749	0	0.0668888888888889	0.0668888888888889	0	0	0.0885087514585764	0.0872112676056338	0
0.01	-1.5	10	0.1	0.5	2	1	6.12021643247425	0	0.00304444444444441	0.00768888888888886	0	0	0.00608888888888881	0.015991196698762	0
0.05	-1.5	10	0.1	0.5	2	1	6.02062711182748	0	0.0150444444444444	0.0020444444444444	0	0	0.0228004009355162	0.00619065420560736	0
0.005	-0.5	10	0.1	0.5	2	1	4.87987671169175	0	0.00525555555555557	0.159088888888889	0	0	0.00958552472858869	0.184135544781832	0
0.01	-0.5	10	0.1	0.5	2	1	5.29634114348733	0	0.00348888888888887	0.0840333333333333	0	0	0.0068213793103448	0.105355223880597	0
0.05	-0.5	10	0.1	0.5	2	1	5.76712702290843	0	0.000255555555555564	0.110688888888889	0	0	0.00083817787418658	0.133604257583821	0
0.005	1	10	0.1	0.5	2	1	2.54405446379477	0.0282	0.785933333333333	0.142966666666667	0.0275111111111112	0.0287449887640449	0.828489466357308	0.167830434782609	0.0280553956834533
0.01	1	10	0.1	0.5	2	1	3.16875111148815	0.00404444444444444	0.803577777777778	0.0283	0.00392222222222227	0.0042232044198895	0.832169199178645	0.0436628571428571	0.0040946375143844
0.05	1	10	0.1	0.5	2	1	4.73501951802372	0	0.0913	0.0200666666666667	0	0	0.11698779661017	0.0333659824046921	0
0.005	-1.5	2	0	1e-05	5	1	6.68153805793787	0	0.000122222222222246	0.0142555555555556	0	0	0.000488028169014179	0.0256091881188119	0
0.01	-1.5	2	0	1e-05	5	1	7.05273461671219	0	0.000244444444444492	0.00226666666666664	0	0	0.00081052631578963	0.00661196141479092	0
0.05	-1.5	2	0	1e-05	5	1	6.90787742304416	0	0.000133333333333319	0.00488888888888894	0	0	0.000519587628865922	0.0115620437956206	0
0.005	-0.5	2	0	1e-05	5	1	5.79428774672119	0	0	0.614155555555556	0	0	0	0.632850885960927	0
0.01	-0.5	2	0	1e-05	5	1	5.97535923880622	0	0	0.508788888888889	0	0	0	0.530422063893358	0
0.05	-0.5	2	0	1e-05	5	1	6.27412720074653	0	0	0.2097	0	0	0	0.23649905519642	0
0.005	1	2	0	1e-05	5	1	5.25107327046607	0	0.0570888888888889	0.0073333333333333	0	0	0.0769554829123328	0.0154428969359331	0
0.01	1	2	0	1e-05	5	1	5.77618059751268	0	0.0081444444444444	0.00990000000000002	0	0	0.0136070718232043	0.0193062768701634	0
0.05	1	2	0	1e-05	5	1	6.07494855945299	0	7.77777777777322e-05	0.100011111111111	0	0	0.000355287009063236	0.122113162853297	0
0.005	-1.5	10	0	1e-05	5	1	6.05684141024449	0	0.122088888888889	5.55555555555864e-05	0	0	0.148510378117458	0.000759036144578735	0
0.01	-1.5	10	0	1e-05	5	1	6.3556093721848	0	0.00421111111111117	0.0022888888888889	0	0	0.00802925598991183	0.00665965362411805	0
0.05	-1.5	10	0	1e-05	5	1	6.21075217851677	0	0.0249555555555555	0.000466666666666615	0	0	0.036896479791395	0.00267272727272698	0
0.005	-0.5	10	0	1e-05	5	1	6.10210928326575	0	0.00329999999999997	0.00851111111111114	0	0	0.00651100478468894	0.0173038495971352	0
0.01	-0.5	10	0	1e-05	5	1	5.71280557528292	0	0.00158888888888886	0.0462111111111111	0	0	0.00362170854271351	0.0647355157504632	0
0.05	-0.5	10	0	1e-05	5	1	5.80334132132544	0	0.000244444444444492	0.126722222222222	0	0	0.00081052631578963	0.150750590086546	0
0.005	1	10	0	1e-05	5	1	2.57121518760753	0.0255444444444444	0.787133333333333	0.134911111111111	0.0248333333333334	0.0260791357191087	0.828489466357308	0.159529927007299	0.0253645575320874
0.01	1	10	0	1e-05	5	1	2.98767961940311	0.00641111111111111	0.8525	0.0357333333333333	0.0062444444444445	0.00665616845960174	0.860084519572954	0.0525571984435797	0.00648461538461544
0.05	1	10	0	1e-05	5	1	3.92019780364105	7.77777777777778e-05	0.109466666666667	0.131511111111111	7.77777777777322e-05	8.43615494978479e-05	0.136239012345679	0.155875202508492	8.43413817833596e-05
0.005	-1.5	2	0	1e-04	5	1	6.79018095318889	0	0.000155555555555575	0.00641111111111115	0	0	0.000578835110746587	0.014014843373494	0
0.01	-1.5	2	0	1e-04	5	1	6.92598457225267	0	0.000133333333333319	0.00654444444444446	0	0	0.000519587628865922	0.0142308724832215	0
0.05	-1.5	2	0	1e-04	5	1	6.77207380398039	0	0.000122222222222246	0.0132222222222222	0	0	0.000488028169014179	0.0241158021712908	0
0.005	-0.5	2	0	1e-04	5	1	5.87576991815945	0	0	0.515066666666667	0	0	0	0.536227312370897	0
0.01	-0.5	2	0	1e-04	5	1	6.06589498484874	0	0	0.400155555555556	0	0	0	0.424884269662921	0
0.05	-0.5	2	0	1e-04	5	1	6.27412720074653	0	0	0.211855555555556	0	0	0	0.238455781637717	0
0.005	1	2	0	1e-04	5	1	5.44119833715536	0	0.0430555555555555	0.00505555555555559	0	0	0.0603305744286597	0.01180236747298	0
0.01	1	2	0	1e-04	5	1	5.25107327046607	0	0.00546666666666662	0.0651	0	0	0.00990287539936094	0.0853696444058977	0
0.05	1	2	0	1e-04	5	1	5.93914494038922	0	3.33333333333297e-05	0.1781	0	0	0.000196108949416321	0.203851021953066	0
0.005	-1.5	10	0	1e-04	5	1	6.08400213405725	0	0.1295	0.000133333333333319	0	0	0.155331147540984	0.00122926829268279	0
0.01	-1.5	10	0	1e-04	5	1	6.28318077535079	0	0.00327777777777782	0.00406666666666666	0	0	0.00648408198866123	0.0101521188772702	0
0.05	-1.5	10	0	1e-04	5	1	6.3556093721848	0	0.0355111111111112	6.66666666666593e-05	0	0	0.050925829908315	0.000833057851239578	0
0.005	-0.5	10	0	1e-04	5	1	6.10210928326575	0	0.00492222222222227	0.00597777777777775	0	0	0.00910570962479618	0.0133113402061855	0
0.01	-0.5	10	0	1e-04	5	1	5.55889480701064	0	0.00298888888888893	0.0476333333333333	0	0	0.00599363395225472	0.0662978827861307	0
0.05	-0.5	10	0	1e-04	5	1	5.69469842607442	0	0.000677777777777777	0.100011111111111	0	0	0.001708	0.122113162853297	0
0.005	1	10	0	1e-04	5	1	2.89714387336059	0.00966666666666667	0.708033333333333	0.0875777777777778	0.0092888888888889	0.00997679180887372	0.787745695364238	0.108983433900165	0.00959562741972217
0.01	1	10	0	1e-04	5	1	3.85682278141129	0.000177777777777778	0.730633333333333	0.00404444444444441	0.000166666666666648	0.000191407548065512	0.80499217877095	0.0101133406835721	0.00017948717948716
0.05	1	10	0	1e-04	5	1	3.56710839407523	6e-04	0.0900222222222222	0.297211111111111	0.000600000000000045	0.000639173320807891	0.115677280453258	0.322369583931133	0.000639023244893215
0.005	-1.5	2	1e-05	1e-04	5	1	6.53668086426984	0	4.44444444444025e-05	0.0328000000000001	0	0	0.00023773584905638	0.049005533596838	0
0.01	-1.5	2	1e-05	1e-04	5	1	6.90787742304416	0	8.88888888889161e-05	0.00734444444444449	0	0	0.000392982456140471	0.0154519480519481	0
0.05	-1.5	2	1e-05	1e-04	5	1	6.85355597541865	0	8.88888888889161e-05	0.00760000000000005	0	0	0.000392982456140471	0.0158426470588236	0
0.005	-0.5	2	1e-05	1e-04	5	1	6.32844864837204	0	1.11111111110729e-05	0.108211111111111	0	0	8.78048780484784e-05	0.13089216	0
0.01	-0.5	2	1e-05	1e-04	5	1	5.93009136578496	0	0	0.5661	0	0	0	0.585727554744526	0
0.05	-0.5	2	1e-05	1e-04	5	1	6.52762728966559	0	0	0.0705222222222223	0	0	0	0.0905943925233645	0
0.005	1	2	1e-05	1e-04	5	1	5.02473390535978	0	0.0290444444444444	0.0309888888888888	0	0	0.0424438144329897	0.0469177570093457	0
0.01	1	2	1e-05	1e-04	5	1	5.73091272449142	0	0.00970000000000004	0.0105666666666666	0	0	0.0155914953933381	0.0203094915254236	0
0.05	1	2	1e-05	1e-04	5	1	6.38277009599756	0	0.000399999999999956	0.0192777777777777	0	0	0.00115788130185054	0.0322552563629656	0
0.005	-1.5	10	1e-05	1e-04	5	1	6.1292700070785	0	0.141711111111111	0	0	0	0.167261394380853	0	0
0.01	-1.5	10	1e-05	1e-04	5	1	6.02968068643173	0	0.00251111111111113	0.0120777777777777	0	0	0.00522735199632863	0.0224804267542059	0
0.05	-1.5	10	1e-05	1e-04	5	1	6.0930557086615	0	0.0163444444444445	0.00149999999999995	0	0	0.0246306976744187	0.00504747774480694	0
0.005	-0.5	10	1e-05	1e-04	5	1	5.79428774672119	0	0.00275555555555551	0.0232666666666667	0	0	0.00563788903924213	0.0374114143920595	0
0.01	-0.5	10	1e-05	1e-04	5	1	5.55889480701064	0	0.00127777777777782	0.0838	0	0	0.00297841726618715	0.105149875518672	0
0.05	-0.5	10	1e-05	1e-04	5	1	5.83050204513819	0	0.000188888888888905	0.107088888888889	0	0	0.000671473354232033	0.12981165152325	0
0.005	1	10	1e-05	1e-04	5	1	2.29055437487572	0.0544666666666667	0.735166666666667	0.269966666666667	0.0532	0.0550983050847458	0.807632840881569	0.295361505065123	0.0538529792457041
0.01	1	10	1e-05	1e-04	5	1	2.48973301616926	0.0323888888888889	0.816466666666667	0.140711111111111	0.0316222222222222	0.0329481946624804	0.836380487804878	0.16539663125162	0.0321899461400359
0.05	1	10	1e-05	1e-04	5	1	4.78028739104498	0	0.0839888888888889	0.0190777777777777	0	0	0.109255405792945	0.0320269430051813	0
0.005	-1.5	2	0	0.001	5	1	6.64532375952086	0	0.000122222222222246	0.0169222222222222	0	0	0.000488028169014179	0.029163829787234	0
0.01	-1.5	2	0	0.001	5	1	6.94409172146117	0	0.000111111111111062	0.0059555555555556	0	0	0.000457765667574729	0.0132814159292036	0
0.05	-1.5	2	0	0.001	5	1	6.83544882621015	0	7.77777777777322e-05	0.00864444444444445	0	0	0.000355287009063236	0.0174893844781445	0
0.005	-0.5	2	0	0.001	5	1	6.21075217851677	0	0	0.175133333333333	0	0	0	0.200810111223458	0
0.01	-0.5	2	0	0.001	5	1	6.22885932772527	0	0	0.2346	0	0	0	0.260373281135307	0
0.05	-0.5	2	0	0.001	5	1	6.14737715628701	0	0	0.328644444444444	0	0	0	0.353086499289436	0
0.005	1	2	0	0.001	5	1	5.24201969586182	0	0.0570222222222222	0.00748888888888888	0	0	0.0768884661117717	0.0156614107883817	0
0.01	1	2	0	0.001	5	1	5.07000177838104	0	0.00705555555555559	0.0876	0	0	0.0121595744680852	0.108983433900165	0
0.05	1	2	0	0.001	5	1	5.73996629909567	0	8.88888888889161e-05	0.273733333333333	0	0	0.000392982456140471	0.299193831325301	0
0.005	-1.5	10	0	0.001	5	1	6.02062711182748	0	0.111888888888889	4.44444444444025e-05	0	0	0.138706750478273	0.000669767441859834	0
0.01	-1.5	10	0	0.001	5	1	6.27412720074653	0	0.00351111111111113	0.00482222222222217	0	0	0.00685301204819281	0.0114761804826861	0
0.05	-1.5	10	0	0.001	5	1	6.40993081981031	0	0.0427777777777778	6.66666666666593e-05	0	0	0.06	0.000833057851239578	0
0.005	-0.5	10	0	0.001	5	1	6.06589498484874	0	0.00248888888888887	0.0107111111111111	0	0	0.00519300827966878	0.0205175675675676	0
0.01	-0.5	10	0	0.001	5	1	5.81239489592969	0	0.00211111111111106	0.0292333333333333	0	0	0.00454054054054044	0.0447981081081081	0
0.05	-0.5	10	0	0.001	5	1	6.1292700070785	0	0.00072222222222218	0.0237555555555555	0	0	0.00180098955470028	0.0379954866008462	0
0.005	1	10	0	0.001	5	1	2.4625722923565	0.0347888888888889	0.805055555555556	0.159177777777778	0.0338888888888889	0.0353579206811562	0.832553327256153	0.184191428571429	0.0344663677130045
0.01	1	10	0	0.001	5	1	3.23212613371791	0.00281111111111111	0.794533333333333	0.0250555555555556	0.00268888888888885	0.00295098356861838	0.831757027463651	0.0395724233983288	0.00282333333333329
0.05	1	10	0	0.001	5	1	3.50373337184547	0.000877777777777778	0.113944444444444	0.280277777777778	0.000855555555555609	0.000932677442023893	0.140678279804028	0.305904716073147	0.000908639662842483
0.005	-1.5	2	1e-05	0.001	5	1	6.51857371506133	0	6.66666666666593e-05	0.0373333333333333	0	0	0.000318315789473649	0.054433944069431	0
0.01	-1.5	2	1e-05	0.001	5	1	7.07989534052495	0	0.000144444444444392	0.00185555555555561	0	0	0.00054966442953	0.00582074688796698	0
0.05	-1.5	2	1e-05	0.001	5	1	6.74491308016763	0	0.000144444444444392	0.0153333333333333	0	0	0.00054966442953	0.0271248636009354	0
0.005	-0.5	2	1e-05	0.001	5	1	6.30128792455929	0	1.11111111110729e-05	0.108033333333333	0	0	8.78048780484784e-05	0.130711976527074	0
0.01	-0.5	2	1e-05	0.001	5	1	6.34655579758055	0	0	0.149377777777778	0	0	0	0.174184473007712	0
0.05	-0.5	2	1e-05	0.001	5	1	6.15643073089126	0	0	0.316977777777778	0	0	0	0.341697148288973	0
0.005	1	2	1e-05	0.001	5	1	4.74407309262797	0	0.0416888888888889	0.0479888888888889	0	0	0.0586905027932961	0.0666904411764705	0
0.01	1	2	1e-05	0.001	5	1	5.12432322600655	0	0.00342222222222222	0.118933333333333	0	0	0.00671709216789267	0.142456192236599	0
0.05	1	2	1e-05	0.001	5	1	5.52268050859363	0	0	0.530688888888889	0	0	0	0.5511	0
0.005	-1.5	10	1e-05	0.001	5	1	6.00251996261898	0	0.114366666666667	4.44444444444025e-05	0	0	0.141084362251836	0.000669767441859834	0
0.01	-1.5	10	1e-05	0.001	5	1	6.24696647693378	0	0.00326666666666664	0.00548888888888888	0	0	0.00646774334351806	0.0125428715365239	0
0.05	-1.5	10	1e-05	0.001	5	1	6.29223434995504	0	0.0300888888888889	0.000277777777777821	0	0	0.0438429810472214	0.00189473684210556	0
0.005	-0.5	10	1e-05	0.001	5	1	5.77618059751268	0	0.00294444444444442	0.0240888888888889	0	0	0.00593336294980003	0.0383797681770285	0
0.01	-0.5	10	1e-05	0.001	5	1	5.6403769784489	0	0.00190000000000001	0.0522	0	0	0.00417153920619557	0.0712055321707757	0
0.05	-0.5	10	1e-05	0.001	5	1	6.05684141024449	0	0.000622222222222191	0.0339444444444444	0	0	0.00159547767100048	0.0503835078534031	0
0.005	1	10	1e-05	0.001	5	1	3.07821536544563	0.00477777777777778	0.853322222222222	0.0266666666666666	0.00466666666666671	0.00497406472343356	0.860531258337039	0.041509951956074	0.00485838879963282
0.01	1	10	1e-05	0.001	5	1	3.71196558774326	3e-04	0.6898	0.0087666666666667	0.000288888888888894	0.000321930447125621	0.770862971175166	0.0177050756901158	0.000309933774834443
0.05	1	10	1e-05	0.001	5	1	4.60826947356419	0	0.0835888888888889	0.0328333333333334	0	0	0.108859948320413	0.0490230414746545	0
0.005	-1.5	2	1e-04	0.001	5	1	6.8445024008144	0	0.000266666666666637	0.00446666666666662	0	0	0.000867096774193453	0.010834652406417	0
0.01	-1.5	2	1e-04	0.001	5	1	6.8626095500229	0	0.000133333333333319	0.00972222222222219	0	0	0.000519587628865922	0.0190991771329579	0
0.05	-1.5	2	1e-04	0.001	5	1	6.79923452779314	0	4.44444444444025e-05	0.0108888888888888	0	0	0.00023773584905638	0.0207703952901597	0
0.005	-0.5	2	1e-04	0.001	5	1	6.43709154362307	0	3.33333333333297e-05	0.0638333333333333	0	0	0.000196108949416321	0.0841463414634146	0
0.01	-0.5	2	1e-04	0.001	5	1	6.31034149916354	0	0	0.1752	0	0	0	0.200835784685368	0
0.05	-0.5	2	1e-04	0.001	5	1	6.45519869283157	0	2.22222222222568e-05	0.100622222222222	0	0	0.000147584187408721	0.122760193652501	0
0.005	1	2	1e-04	0.001	5	1	5.70375200067867	0	0.0642222222222222	0.000911111111111085	0	0	0.0852786885245901	0.00379504132231394	0
0.01	1	2	1e-04	0.001	5	1	5.52268050859363	0	0.00653333333333328	0.0266999999999999	0	0	0.0114421621621621	0.0415475814751286	0
0.05	1	2	1e-04	0.001	5	1	5.73091272449142	0	2.22222222222568e-05	0.308911111111111	0	0	0.000147584187408721	0.333942040038132	0
0.005	-1.5	10	1e-04	0.001	5	1	6.05684141024449	0	0.122033333333333	4.44444444444025e-05	0	0	0.148482618025751	0.000669767441859834	0
0.01	-1.5	10	1e-04	0.001	5	1	6.30128792455929	0	0.00364444444444445	0.00364444444444445	0	0	0.0070646153846154	0.00933438735177867	0
0.05	-1.5	10	1e-04	0.001	5	1	6.30128792455929	0	0.0317444444444445	0.000233333333333308	0	0	0.0459307177033493	0.00170160771704161	0
0.005	-0.5	10	1e-04	0.001	5	1	6.08400213405725	0	0.00283333333333335	0.00943333333333329	0	0	0.00576581426648726	0.0186691099476439	0
0.01	-0.5	10	1e-04	0.001	5	1	5.3778233149256	0	0.000811111111111096	0.147022222222222	0	0	0.00198660907127426	0.171879587628866	0
0.05	-0.5	10	1e-04	0.001	5	1	5.97535923880622	0	0.000433333333333286	0.0509111111111111	0	0	0.00122314872433092	0.0697682175226586	0
0.005	1	10	1e-04	0.001	5	1	2.99673319400736	0.00627777777777778	0.668355555555556	0.0809	0.00609999999999999	0.00651923076923077	0.748743097061003	0.101792621359223	0.00633751717819514
0.01	1	10	1e-04	0.001	5	1	3.06916179084138	0.00496666666666667	0.791766666666667	0.0394888888888889	0.00483333333333336	0.00516834136269787	0.830970291531698	0.0570269340974212	0.00503074804956404
0.05	1	10	1e-04	0.001	5	1	2.23623292725021	0.0652444444444444	0.148133333333333	0.926722222222222	0.0636444444444444	0.0658395550611791	0.173402012903226	0.933099223085461	0.0642821643286573
0.005	-1.5	2	0	0.01	5	1	6.77207380398039	0	0.000199999999999978	0.00744444444444448	0	0	0.000698921417565408	0.015611650485437	0
[truncated: 2,537 more rows]
