# Supplementary material for: Memory Effects on Movement Behavior in Animal Foraging
Source: PLoS One. 2015 Aug 19;10(8):e0136057. doi: 10.1371/journal.pone.0136057 (PMC4542208; doi:10.1371/journal.pone.0136057)
Supplement: S2 Appendix — (ZIP) [file pone.0136057.s005.zip]

Archive with 4 entries (3 files):
- ForagerKinRW.csv
- ForagerMemory.csv
- __MACOSX/
- __MACOSX/._ForagerMemory.csv
