# Supplementary material for: Memory Effects on Movement Behavior in Animal Foraging
Source: PLoS One. 2015 Aug 19;10(8):e0136057. doi: 10.1371/journal.pone.0136057 (PMC4542208; doi:10.1371/journal.pone.0136057)
Supplement: S2 Appendix — (ZIP) [file pone.0136057.s005.zip › ForagerKinRW.csv]

SimulationIndex	ResourceRegenerationRate	ConsumerConsumptionRate	ConsumerConsumptionSpatialScale	ForagerSpeedSearch	ForagerSpeedFeeding	ForagerTauSearch	ForagerTauFeeding	IntervalSize	AvgConsumptionIsFullyInformed	AvgConsumptionLearningRate	AvgConsumptionStartValue	ConsumeDuringSearch	ShortLearningRate	LongLearningRate	ShortDecayRate	LongDecayRate	ShortMemoryFactor	MemorySpatialScaleForaging	MemorySpatialScalePredation	MovementProcess	MovementType	MemoryIsFullyInformed	MemoryValueUninformed	DirectionUpdaterTimeStep	DirectionUpdaterType	NumSteps	BurnInSteps	RepeatSimulation	ResourceLandscapeFileName	EmptyBorderSize	RandomSeed	CreateRandomSeed	PredatorDuration	PredatorRandomness	TotalPredationPressure	PredatorEncounterRadius	PredatorLearningRate	PredatorDecayRate	PredatorMemoryFactor	PredatorIntroduction	FoodSafetyTradeoff	TotalConsumption0	StdDevConsumption0	DistanceTraveled0	Sinuosity0	AverageSpeed0	AverageSpeedSearch0	AverageSpeedFeeding0	MeanSinTurningAngle0
0	0.05	1.0	1.0	6.0	1.0	4.0	2.0	0.1	true	0.9	0.0	true	1.0	1.0	0.0010	1.0E-4	2.0	5.0	1.0	ContinuousCorrelated	Kinesis	true	0.0	1.0	PoissonProcess	1000	0	1	land18.csv	0	2038835887	true	500	0.5	0	5.0	1.0	0.01	1.0	false	0.0	0.4010711204516555	6.413450457426005E-5	1521.1293806773003	61.14704238104546	1.5217260089572575	2.3538030486683743	0.5141456537731272	5.606778561018051E-4
1	0.05	1.0	1.0	6.0	1.0	4.0	2.0	0.1	true	0.9	0.0	true	1.0	1.0	0.0010	1.0E-4	2.0	5.0	1.0	ContinuousCorrelated	Kinesis	true	0.0	1.0	PoissonProcess	1000	0	1	land20.csv	0	2038839580	true	500	0.5	0	5.0	1.0	0.01	1.0	false	0.0	0.24312946478483755	2.615725018736686E-5	1330.7447435297634	107.87564635070123	1.3313355401984135	2.154789902448349	0.5164008012745988	-2.59777271564742E-4
2	0.05	1.0	1.0	6.0	1.0	4.0	2.0	0.1	true	0.9	0.0	true	1.0	1.0	0.0010	1.0E-4	2.0	5.0	1.0	ContinuousCorrelated	Kinesis	true	0.0	1.0	PoissonProcess	1000	0	1	land23.csv	0	2038842768	true	500	0.5	0	5.0	1.0	0.01	1.0	false	0.0	0.2086598972074847	1.0443078374254745E-5	1161.4386246811027	41.891351953386625	1.1620380006777506	2.273196294905772	0.49761576721637013	-0.0011352872598646732
3	0.05	1.0	1.0	6.0	1.0	4.0	2.0	0.1	true	0.9	0.0	true	1.0	1.0	0.0010	1.0E-4	2.0	5.0	1.0	ContinuousCorrelated	Kinesis	true	0.0	1.0	PoissonProcess	1000	0	1	land82.csv	0	2038845956	true	500	0.5	0	5.0	1.0	0.01	1.0	false	0.0	0.5973554028681375	1.0328865078119634E-4	1734.668960000451	71.3376302607649	1.7352461658048914	2.52944072998983	0.5193304688282447	0.0012164910405748758
4	0.05	1.0	1.0	6.0	1.0	4.0	2.0	0.1	true	0.9	0.0	true	1.0	1.0	0.0010	1.0E-4	2.0	5.0	1.0	ContinuousCorrelated	Kinesis	true	0.0	1.0	PoissonProcess	1000	0	1	land84.csv	0	2038848585	true	500	0.5	0	5.0	1.0	0.01	1.0	false	0.0	0.26304346639770193	2.307586899334473E-5	1022.6874181392931	260.6157565539636	1.0232874006331758	1.922920845996579	0.4744689938577888	0.002353515341301118
5	0.05	1.0	1.0	6.0	1.0	4.0	2.0	0.1	true	0.9	0.0	true	1.0	1.0	0.0010	1.0E-4	2.0	5.0	1.0	ContinuousCorrelated	Kinesis	true	0.0	1.0	PoissonProcess	1000	0	1	land87.csv	0	2038851639	true	500	0.5	0	5.0	1.0	0.01	1.0	false	0.0	0.19479906361286783	9.33882678576923E-6	1070.3174781188084	50.055465908983734	1.0709132660654586	1.926835952002939	0.5118538294413941	0.00770633673964377
6	0.05	1.0	1.0	6.0	1.0	4.0	2.0	0.1	true	0.9	0.0	true	1.0	1.0	0.0010	1.0E-4	2.0	5.0	1.0	ContinuousCorrelated	Kinesis	true	0.0	1.0	PoissonProcess	1000	0	1	land138.csv	0	2038854730	true	500	0.5	0	5.0	1.0	0.01	1.0	false	0.0	0.29428642507275543	4.832748196286555E-5	1532.5131254576243	53.672977603051606	1.5330876434861798	2.2799553622769304	0.4702443887107724	-0.0047280177038316745
7	0.05	1.0	1.0	6.0	1.0	4.0	2.0	0.1	true	0.9	0.0	true	1.0	1.0	0.0010	1.0E-4	2.0	5.0	1.0	ContinuousCorrelated	Kinesis	true	0.0	1.0	PoissonProcess	1000	0	1	land140.csv	0	2038857584	true	500	0.5	0	5.0	1.0	0.01	1.0	false	0.0	0.2660993699142209	2.5241664820200794E-5	1206.3133861726715	46.74857239799727	1.206904289331945	2.200873321268566	0.5087231136815465	0.0027548958583662347
8	0.05	1.0	1.0	6.0	1.0	4.0	2.0	0.1	true	0.9	0.0	true	1.0	1.0	0.0010	1.0E-4	2.0	5.0	1.0	ContinuousCorrelated	Kinesis	true	0.0	1.0	PoissonProcess	1000	0	1	land143.csv	0	2038860716	true	500	0.5	0	5.0	1.0	0.01	1.0	false	0.0	0.1994088851389879	8.672467143641916E-6	1178.7126526814798	95.22643302539106	1.1793094792313175	2.1678295895234125	0.4969031015381221	-0.0034093830730665326
9	0.05	1.0	1.0	6.0	1.0	4.0	2.0	0.1	true	0.9	0.0	true	1.0	1.0	0.0010	1.0E-4	2.0	5.0	1.0	ContinuousCorrelated	Kinesis	true	0.0	1.0	PoissonProcess	1000	0	1	land202.csv	0	2038863825	true	500	0.5	0	5.0	1.0	0.01	1.0	false	0.0	0.07654763421429604	2.850641555611351E-5	2163.9134921427903	602.5908363526099	2.1645005467398555	2.3421278041044946	0.5165650357115145	0.004858767665810748
10	0.05	1.0	1.0	6.0	1.0	4.0	2.0	0.1	true	0.9	0.0	true	1.0	1.0	0.0010	1.0E-4	2.0	5.0	1.0	ContinuousCorrelated	Kinesis	true	0.0	1.0	PoissonProcess	1000	0	1	land204.csv	0	2038866665	true	500	0.5	0	5.0	1.0	0.01	1.0	false	0.0	0.16575983390413837	2.356533960955617E-5	1674.5917665069346	97.8112624868554	1.6751917580164533	2.3253877818223745	0.5025786318198002	-7.281901067180325E-4
11	0.05	1.0	1.0	6.0	1.0	4.0	2.0	0.1	true	0.9	0.0	true	1.0	1.0	0.0010	1.0E-4	2.0	5.0	1.0	ContinuousCorrelated	Kinesis	true	0.0	1.0	PoissonProcess	1000	0	1	land207.csv	0	2038869607	true	500	0.5	0	5.0	1.0	0.01	1.0	false	0.0	0.19682868906361964	1.1725548191984215E-5	1239.5339452996873	89.05976676226737	1.240132206240049	2.4343733177068256	0.4877700390323772	0.0019896886337750705
12	0.05	1.0	1.0	6.0	1.0	4.0	2.0	0.1	true	0.9	0.0	true	1.0	1.0	0.0010	1.0E-4	2.0	5.0	1.0	ContinuousCorrelated	Kinesis	true	0.0	1.0	PoissonProcess	1000	0	1	land258.csv	0	2038872729	true	500	0.5	0	5.0	1.0	0.01	1.0	false	0.0	0.31811044637159086	5.3522830401742195E-5	1604.4518357213212	73.53351430269214	1.6050336857967764	2.37348068772963	0.49003215358047675	0.0027957267257593703
13	0.05	1.0	1.0	6.0	1.0	4.0	2.0	0.1	true	0.9	0.0	true	1.0	1.0	0.0010	1.0E-4	2.0	5.0	1.0	ContinuousCorrelated	Kinesis	true	0.0	1.0	PoissonProcess	1000	0	1	land260.csv	0	2038875554	true	500	0.5	0	5.0	1.0	0.01	1.0	false	0.0	0.22304495777681554	2.56211312796361E-5	1413.0628726960804	144.95559620022138	1.4136561821361837	2.1749297252436337	0.5214250703621075	-0.0012638573494548144
14	0.05	1.0	1.0	6.0	1.0	4.0	2.0	0.1	true	0.9	0.0	true	1.0	1.0	0.0010	1.0E-4	2.0	5.0	1.0	ContinuousCorrelated	Kinesis	true	0.0	1.0	PoissonProcess	1000	0	1	land263.csv	0	2038878628	true	500	0.5	0	5.0	1.0	0.01	1.0	false	0.0	0.19710200633297648	8.17023980704922E-6	1236.7101425645812	71.32171215056096	1.2372941161108308	2.191036352717212	0.5047877024230296	-0.0034290163887679237
15	0.05	1.0	1.0	6.0	1.0	4.0	2.0	0.1	true	0.9	0.0	true	1.0	1.0	0.0010	1.0E-4	2.0	5.0	1.0	ContinuousCorrelated	Kinesis	true	0.0	1.0	PoissonProcess	1000	0	1	land322.csv	0	2038881770	true	500	0.5	0	5.0	1.0	0.01	1.0	false	0.0	0.36116199212874944	5.143351579328096E-5	1588.5035503808342	94.33939693781076	1.5891035502408137	2.4548238936679847	0.5245667176876764	-0.001475893603648815
16	0.05	1.0	1.0	6.0	1.0	4.0	2.0	0.1	true	0.9	0.0	true	1.0	1.0	0.0010	1.0E-4	2.0	5.0	1.0	ContinuousCorrelated	Kinesis	true	0.0	1.0	PoissonProcess	1000	0	1	land324.csv	0	2038884535	true	500	0.5	0	5.0	1.0	0.01	1.0	false	0.0	0.226114208671602	2.9195691982592623E-5	1558.4998946204066	53.84395107813393	1.559072001115049	2.3308181246626685	0.5102327895656692	-0.003782918971403438
17	0.05	1.0	1.0	6.0	1.0	4.0	2.0	0.1	true	0.9	0.0	true	1.0	1.0	0.0010	1.0E-4	2.0	5.0	1.0	ContinuousCorrelated	Kinesis	true	0.0	1.0	PoissonProcess	1000	0	1	land327.csv	0	2038887345	true	500	0.5	0	5.0	1.0	0.01	1.0	false	0.0	0.17241509496624868	6.8800792884276075E-6	1503.4727913655402	374.61941075942804	1.5040725422881895	2.2624703381778732	0.48344665558420585	0.007499409934298327
18	0.05	1.0	1.0	6.0	1.0	4.0	2.0	0.1	true	0.9	0.0	true	1.0	1.0	0.0010	1.0E-4	2.0	5.0	1.0	ContinuousCorrelated	Kinesis	true	0.0	1.0	PoissonProcess	1000	0	1	land378.csv	0	2038890386	true	500	0.5	0	5.0	1.0	0.01	1.0	false	0.0	0.4118756643544821	8.586842923038775E-5	1577.6159484179345	115.8015168083605	1.5782029199888437	2.2508644040278782	0.5131700510466333	0.0017254825222791862
19	0.05	1.0	1.0	6.0	1.0	4.0	2.0	0.1	true	0.9	0.0	true	1.0	1.0	0.0010	1.0E-4	2.0	5.0	1.0	ContinuousCorrelated	Kinesis	true	0.0	1.0	PoissonProcess	1000	0	1	land380.csv	0	2038893197	true	500	0.5	0	5.0	1.0	0.01	1.0	false	0.0	0.2707293027616504	2.6951255094409907E-5	1370.9339506604351	68.8169366696146	1.3715050082690474	2.4679640840871597	0.5026314513248133	-3.0740817946347057E-4
20	0.05	1.0	1.0	6.0	1.0	4.0	2.0	0.1	true	0.9	0.0	true	1.0	1.0	0.0010	1.0E-4	2.0	5.0	1.0	ContinuousCorrelated	Kinesis	true	0.0	1.0	PoissonProcess	1000	0	1	land383.csv	0	2038896153	true	500	0.5	0	5.0	1.0	0.01	1.0	false	0.0	0.2029466654823916	8.06327670525837E-6	1147.5229262779458	56.99254817373143	1.1481008550989174	2.110019041478394	0.5177028912061307	0.0017355413616637182
21	0.05	1.0	1.0	6.0	1.0	4.0	2.0	0.1	true	0.9	0.0	true	1.0	1.0	0.0010	1.0E-4	2.0	5.0	1.0	ContinuousCorrelated	Kinesis	true	0.0	1.0	PoissonProcess	1000	0	1	land442.csv	0	2038899208	true	500	0.5	0	5.0	1.0	0.01	1.0	false	0.0	0.48279063574117437	7.089326262807445E-5	1455.3377171812053	143.02392998642907	1.4559375342723782	2.228872334208094	0.5203515562776819	-8.460223872754679E-4
22	0.05	1.0	1.0	6.0	1.0	4.0	2.0	0.1	true	0.9	0.0	true	1.0	1.0	0.0010	1.0E-4	2.0	5.0	1.0	ContinuousCorrelated	Kinesis	true	0.0	1.0	PoissonProcess	1000	0	1	land444.csv	0	2038901921	true	500	0.5	0	5.0	1.0	0.01	1.0	false	0.0	0.2920065874422376	4.6534585846742516E-5	1651.1347853154336	70.7619938122876	1.6517337438190778	2.3947522277345126	0.4992969116237035	-6.323120711092278E-4
23	0.05	1.0	1.0	6.0	1.0	4.0	2.0	0.1	true	0.9	0.0	true	1.0	1.0	0.0010	1.0E-4	2.0	5.0	1.0	ContinuousCorrelated	Kinesis	true	0.0	1.0	PoissonProcess	1000	0	1	land447.csv	0	2038904832	true	500	0.5	0	5.0	1.0	0.01	1.0	false	0.0	0.16868232770277783	1.1669966094941584E-5	1393.7286585377983	87.53552588730545	1.394320430406514	2.1770590490895216	0.5155463794163958	0.0028113180643366295
24	0.05	1.0	1.0	6.0	1.0	4.0	2.0	0.1	true	0.9	0.0	true	1.0	1.0	0.0010	1.0E-4	2.0	5.0	1.0	ContinuousCorrelated	Kinesis	true	0.0	1.0	PoissonProcess	1000	0	1	land498.csv	0	2038907916	true	500	0.5	0	5.0	1.0	0.01	1.0	false	0.0	0.3428547971355129	6.316304841300831E-5	1407.164378930187	93.46911224515023	1.4077360624794528	2.251939569656273	0.48877434998873265	-0.0011872552052782878
25	0.05	1.0	1.0	6.0	1.0	4.0	2.0	0.1	true	0.9	0.0	true	1.0	1.0	0.0010	1.0E-4	2.0	5.0	1.0	ContinuousCorrelated	Kinesis	true	0.0	1.0	PoissonProcess	1000	0	1	land500.csv	0	2038910756	true	500	0.5	0	5.0	1.0	0.01	1.0	false	0.0	0.26792740048573155	2.3245318023332642E-5	1197.4528201047324	54.398681382204984	1.198043408308114	2.1431309800546683	0.5066157043030619	5.634497027070952E-4
26	0.05	1.0	1.0	6.0	1.0	4.0	2.0	0.1	true	0.9	0.0	true	1.0	1.0	0.0010	1.0E-4	2.0	5.0	1.0	ContinuousCorrelated	Kinesis	true	0.0	1.0	PoissonProcess	1000	0	1	land503.csv	0	2038913772	true	500	0.5	0	5.0	1.0	0.01	1.0	false	0.0	0.2115604160898543	9.30369704816209E-6	1141.0648255477458	56.67384475852149	1.1416378800219784	2.2461971093439863	0.5031653445940888	-9.923982451772232E-4
27	0.05	1.0	1.0	6.0	1.0	4.0	2.0	0.1	true	0.9	0.0	true	1.0	1.0	0.0010	1.0E-4	2.0	5.0	1.0	ContinuousCorrelated	Kinesis	true	0.0	1.0	PoissonProcess	1000	0	1	land562.csv	0	2038916943	true	500	0.5	0	5.0	1.0	0.01	1.0	false	0.0	0.6066693414004056	1.0880049986990665E-4	1644.482779692685	50.81395679413203	1.6450592674246025	2.364998995135544	0.5166299894592025	-1.7581154548262118E-4
28	0.05	1.0	1.0	6.0	1.0	4.0	2.0	0.1	true	0.9	0.0	true	1.0	1.0	0.0010	1.0E-4	2.0	5.0	1.0	ContinuousCorrelated	Kinesis	true	0.0	1.0	PoissonProcess	1000	0	1	land564.csv	0	2038919647	true	500	0.5	0	5.0	1.0	0.01	1.0	false	0.0	0.22667220648991696	1.3375909606493493E-5	1052.6186446668057	54.601668535418966	1.053188756109447	2.1639221179643666	0.5117826536553994	0.003093850743544967
29	0.05	1.0	1.0	6.0	1.0	4.0	2.0	0.1	true	0.9	0.0	true	1.0	1.0	0.0010	1.0E-4	2.0	5.0	1.0	ContinuousCorrelated	Kinesis	true	0.0	1.0	PoissonProcess	1000	0	1	land567.csv	0	2038922715	true	500	0.5	0	5.0	1.0	0.01	1.0	false	0.0	0.174612671495837	1.2498048733443836E-5	1394.5219800787095	91.9851270266879	1.3950968754105093	2.314235842580633	0.5013384714364069	-0.008172305024615223
30	0.05	1.0	1.0	6.0	1.0	4.0	2.0	0.1	true	0.9	0.0	true	1.0	1.0	0.0010	1.0E-4	2.0	5.0	1.0	ContinuousCorrelated	Kinesis	true	0.0	1.0	PoissonProcess	1000	0	1	land618.csv	0	2038925755	true	500	0.5	0	5.0	1.0	0.01	1.0	false	0.0	0.41696232447157694	7.737130620801251E-5	1700.9317621681766	108.73478571091232	1.7015018278481093	2.436028369644002	0.5056038182750272	-0.0033251378218052113
31	0.05	1.0	1.0	6.0	1.0	4.0	2.0	0.1	true	0.9	0.0	true	1.0	1.0	0.0010	1.0E-4	2.0	5.0	1.0	ContinuousCorrelated	Kinesis	true	0.0	1.0	PoissonProcess	1000	0	1	land620.csv	0	2038928624	true	500	0.5	0	5.0	1.0	0.01	1.0	false	0.0	0.2212858368044068	2.1944471634667886E-5	1392.393822441807	116.07253304772875	1.3929715171557078	2.3475876664220476	0.5050550486526237	-0.004789076387461644
32	0.05	1.0	1.0	6.0	1.0	4.0	2.0	0.1	true	0.9	0.0	true	1.0	1.0	0.0010	1.0E-4	2.0	5.0	1.0	ContinuousCorrelated	Kinesis	true	0.0	1.0	PoissonProcess	1000	0	1	land623.csv	0	2038931742	true	500	0.5	0	5.0	1.0	0.01	1.0	false	0.0	0.21689279919608268	9.016066763491367E-6	1100.2920245867306	54.978545327318386	1.100881478934614	2.2008041110908843	0.5127706056331282	0.0010420529251801871
33	0.05	1.0	1.0	6.0	1.0	4.0	2.0	0.1	true	0.9	0.0	true	1.0	1.0	0.0010	1.0E-4	2.0	5.0	1.0	ContinuousCorrelated	Kinesis	true	0.0	1.0	PoissonProcess	1000	0	1	land682.csv	0	2038934963	true	500	0.5	0	5.0	1.0	0.01	1.0	false	0.0	0.3172023701559261	5.9108087452149035E-5	1661.9250494178818	109.01270204109844	1.6625248922141627	2.3203579794721274	0.521033342552092	-8.50383773948656E-4
34	0.05	1.0	1.0	6.0	1.0	4.0	2.0	0.1	true	0.9	0.0	true	1.0	1.0	0.0010	1.0E-4	2.0	5.0	1.0	ContinuousCorrelated	Kinesis	true	0.0	1.0	PoissonProcess	1000	0	1	land684.csv	0	2038937724	true	500	0.5	0	5.0	1.0	0.01	1.0	false	0.0	0.2709477826628381	5.178418223890609E-5	1772.3262939932813	187.3369303313679	1.7729228271839161	2.3710784058804393	0.5317316079206521	-0.0017906229986198927
35	0.05	1.0	1.0	6.0	1.0	4.0	2.0	0.1	true	0.9	0.0	true	1.0	1.0	0.0010	1.0E-4	2.0	5.0	1.0	ContinuousCorrelated	Kinesis	true	0.0	1.0	PoissonProcess	1000	0	1	land687.csv	0	2038940457	true	500	0.5	0	5.0	1.0	0.01	1.0	false	0.0	0.19921859362028954	7.983111198183223E-6	1171.05957830946	51.8273220583079	1.1716522308094282	2.144616388744549	0.5002625642809394	-0.0023700372272064314
36	0.05	1.0	1.0	6.0	1.0	4.0	2.0	0.1	true	0.9	0.0	true	1.0	1.0	0.0010	1.0E-4	2.0	5.0	1.0	ContinuousCorrelated	Kinesis	true	0.0	1.0	PoissonProcess	1000	0	1	land738.csv	0	2038943488	true	500	0.5	0	5.0	1.0	0.01	1.0	false	0.0	0.2770201151009762	5.8103278145075795E-5	1797.7140565882567	69.45886259760965	1.7983098143950567	2.40988110493074	0.45535476892664856	0.0024607034710900336
37	0.05	1.0	1.0	6.0	1.0	4.0	2.0	0.1	true	0.9	0.0	true	1.0	1.0	0.0010	1.0E-4	2.0	5.0	1.0	ContinuousCorrelated	Kinesis	true	0.0	1.0	PoissonProcess	1000	0	1	land740.csv	0	2038946261	true	500	0.5	0	5.0	1.0	0.01	1.0	false	0.0	0.2678404832484483	2.5805652334016514E-5	1193.743557572018	72.80262875154175	1.1943288411199164	2.080944956480919	0.5189010604960603	0.004932624113656109
38	0.05	1.0	1.0	6.0	1.0	4.0	2.0	0.1	true	0.9	0.0	true	1.0	1.0	0.0010	1.0E-4	2.0	5.0	1.0	ContinuousCorrelated	Kinesis	true	0.0	1.0	PoissonProcess	1000	0	1	land743.csv	0	2038949372	true	500	0.5	0	5.0	1.0	0.01	1.0	false	0.0	0.20436013492355445	8.846965962996145E-6	1190.5513002645384	81.06636198769374	1.1911214922739608	2.2232231906312525	0.5155764362346702	0.002535913817275275
39	0.05	1.0	1.0	6.0	1.0	4.0	2.0	0.1	true	0.9	0.0	true	1.0	1.0	0.0010	1.0E-4	2.0	5.0	1.0	ContinuousCorrelated	Kinesis	true	0.0	1.0	PoissonProcess	1000	0	1	land802.csv	0	2038952619	true	500	0.5	0	5.0	1.0	0.01	1.0	false	0.0	0.5565722651523971	9.666083131887722E-5	1610.7480669707525	422.4789568341009	1.6113235549280263	2.38159282388932	0.4876433059122216	0.005348275976454308
40	0.05	1.0	1.0	6.0	1.0	4.0	2.0	0.1	true	0.9	0.0	true	1.0	1.0	0.0010	1.0E-4	2.0	5.0	1.0	ContinuousCorrelated	Kinesis	true	0.0	1.0	PoissonProcess	1000	0	1	land804.csv	0	2038955353	true	500	0.5	0	5.0	1.0	0.01	1.0	false	0.0	0.32075628800679595	5.01193583057342E-5	1580.1211575416567	59.770629632903635	1.5806947159393625	2.3515807712031798	0.5300163684058663	-0.008910247400144355
41	0.05	1.0	1.0	6.0	1.0	4.0	2.0	0.1	true	0.9	0.0	true	1.0	1.0	0.0010	1.0E-4	2.0	5.0	1.0	ContinuousCorrelated	Kinesis	true	0.0	1.0	PoissonProcess	1000	0	1	land807.csv	0	2038958182	true	500	0.5	0	5.0	1.0	0.01	1.0	false	0.0	0.24972459182591963	1.315010158326995E-5	976.3786183947626	76.65612801831725	0.9769540236170173	2.1410556565207446	0.5296192876063983	4.7010318713407243E-4
42	0.05	1.0	1.0	6.0	1.0	4.0	2.0	0.1	true	0.9	0.0	true	1.0	1.0	0.0010	1.0E-4	2.0	5.0	1.0	ContinuousCorrelated	Kinesis	true	0.0	1.0	PoissonProcess	1000	0	1	land858.csv	0	2038961275	true	500	0.5	0	5.0	1.0	0.01	1.0	false	0.0	0.3438796611652117	6.731482262614736E-5	1653.1060209564785	133.33200354488346	1.6536762186022151	2.252408708208683	0.504284650963539	1.97524753853103E-4
43	0.05	1.0	1.0	6.0	1.0	4.0	2.0	0.1	true	0.9	0.0	true	1.0	1.0	0.0010	1.0E-4	2.0	5.0	1.0	ContinuousCorrelated	Kinesis	true	0.0	1.0	PoissonProcess	1000	0	1	land860.csv	0	2038964123	true	500	0.5	0	5.0	1.0	0.01	1.0	false	0.0	0.22714566804509267	2.2200942223983888E-5	1359.5268181446095	44.08493908714981	1.3601259487558932	2.356182414165502	0.5092392185237239	0.002112162887818534
44	0.05	1.0	1.0	6.0	1.0	4.0	2.0	0.1	true	0.9	0.0	true	1.0	1.0	0.0010	1.0E-4	2.0	5.0	1.0	ContinuousCorrelated	Kinesis	true	0.0	1.0	PoissonProcess	1000	0	1	land863.csv	0	2038967214	true	500	0.5	0	5.0	1.0	0.01	1.0	false	0.0	0.20830643856252842	9.198736593788669E-6	1123.0305124046542	77.71031104887496	1.1236178368351175	2.216856914219868	0.5232255007655686	-0.0016375414592296495
45	0.05	1.0	1.0	6.0	1.0	4.0	2.0	0.1	true	0.9	0.0	true	1.0	1.0	0.0010	1.0E-4	2.0	5.0	1.0	ContinuousCorrelated	Kinesis	true	0.0	1.0	PoissonProcess	1000	0	1	land922.csv	0	2038970530	true	500	0.5	0	5.0	1.0	0.01	1.0	false	0.0	0.4204041339780808	8.269282965456094E-5	1766.556617638445	62.79236572601452	1.7671459608699875	2.4073840081021296	0.4939409500263957	0.003653067058134502
46	0.05	1.0	1.0	6.0	1.0	4.0	2.0	0.1	true	0.9	0.0	true	1.0	1.0	0.0010	1.0E-4	2.0	5.0	1.0	ContinuousCorrelated	Kinesis	true	0.0	1.0	PoissonProcess	1000	0	1	land924.csv	0	2038973431	true	500	0.5	0	5.0	1.0	0.01	1.0	false	0.0	0.15231602685335036	1.5299499014095328E-5	1464.6609160208668	608.4943412647204	1.4652457950325586	2.1639753894654286	0.5168051998546865	-0.005173458086412911
47	0.05	1.0	1.0	6.0	1.0	4.0	2.0	0.1	true	0.9	0.0	true	1.0	1.0	0.0010	1.0E-4	2.0	5.0	1.0	ContinuousCorrelated	Kinesis	true	0.0	1.0	PoissonProcess	1000	0	1	land927.csv	0	2038976518	true	500	0.5	0	5.0	1.0	0.01	1.0	false	0.0	0.19749736028665874	1.3677330049859486E-5	1401.7811695988637	195.85323062979066	1.4023544705792816	2.543433971943252	0.5123205839689435	0.0026124408372044604
48	0.05	1.0	1.0	6.0	1.0	4.0	2.0	0.1	true	0.9	0.0	true	1.0	1.0	0.0010	1.0E-4	2.0	5.0	1.0	ContinuousCorrelated	Kinesis	true	0.0	1.0	PoissonProcess	1000	0	1	land978.csv	0	2038979612	true	500	0.5	0	5.0	1.0	0.01	1.0	false	0.0	0.3041287888410108	5.3713209332238615E-5	1567.1883900260104	263.67498729674156	1.5677880270416746	2.350915008056286	0.49823703073286013	0.0021786084601978293
49	0.05	1.0	1.0	6.0	1.0	4.0	2.0	0.1	true	0.9	0.0	true	1.0	1.0	0.0010	1.0E-4	2.0	5.0	1.0	ContinuousCorrelated	Kinesis	true	0.0	1.0	PoissonProcess	1000	0	1	land980.csv	0	2038982442	true	500	0.5	0	5.0	1.0	0.01	1.0	false	0.0	0.2743801549234952	2.1537788681753376E-5	1108.0750472800903	43.099850722334594	1.1086566905401292	2.132492810286267	0.4977552727704707	0.0017079641490669306
50	0.05	1.0	1.0	6.0	1.0	4.0	2.0	0.1	true	0.9	0.0	true	1.0	1.0	0.0010	1.0E-4	2.0	5.0	1.0	ContinuousCorrelated	Kinesis	true	0.0	1.0	PoissonProcess	1000	0	1	land983.csv	0	2038985591	true	500	0.5	0	5.0	1.0	0.01	1.0	false	0.0	0.21153659265622748	9.514700503945185E-6	1121.6638077305065	36.04236705010365	1.1222617202082756	2.074505387989304	0.5258898931429489	-1.0126224056689759E-4
51	0.05	1.0	1.0	6.0	1.0	4.0	2.0	0.1	true	0.9	0.0	true	1.0	1.0	0.0010	1.0E-4	2.0	5.0	1.0	ContinuousCorrelated	Kinesis	true	0.0	1.0	PoissonProcess	1000	0	1	land1042.csv	0	2038988853	true	500	0.5	0	5.0	1.0	0.01	1.0	false	0.0	0.16830065694953175	4.424857467311761E-5	1980.5654755213006	106.34185417001244	1.9811362511970556	2.382412803034119	0.5475863200114461	-0.0031755887235634973
52	0.05	1.0	1.0	6.0	1.0	4.0	2.0	0.1	true	0.9	0.0	true	1.0	1.0	0.0010	1.0E-4	2.0	5.0	1.0	ContinuousCorrelated	Kinesis	true	0.0	1.0	PoissonProcess	1000	0	1	land1044.csv	0	2038991790	true	500	0.5	0	5.0	1.0	0.01	1.0	false	0.0	0.32145223013215496	3.5321048499228027E-5	1302.0905567747427	62.03344213722966	1.3026884831253653	2.3068973550795433	0.5257535594885885	-0.002232531286302419
53	0.05	1.0	1.0	6.0	1.0	4.0	2.0	0.1	true	0.9	0.0	true	1.0	1.0	0.0010	1.0E-4	2.0	5.0	1.0	ContinuousCorrelated	Kinesis	true	0.0	1.0	PoissonProcess	1000	0	1	land1047.csv	0	2038994767	true	500	0.5	0	5.0	1.0	0.01	1.0	false	0.0	0.17202316453622724	7.547161734827788E-6	1431.140363270887	55.675885811329856	1.4317107873702613	2.179341050894935	0.495109774651034	-0.00205441842023426
54	0.05	1.0	1.0	6.0	1.0	4.0	2.0	0.1	true	0.9	0.0	true	1.0	1.0	0.0010	1.0E-4	2.0	5.0	1.0	ContinuousCorrelated	Kinesis	true	0.0	1.0	PoissonProcess	1000	0	1	land1098.csv	0	2038997832	true	500	0.5	0	5.0	1.0	0.01	1.0	false	0.0	0.39853575516638445	6.867769259052976E-5	1515.1850222159276	96.01910296194889	1.5157550226002643	2.2194062325796993	0.5015077707158423	0.0015259096829817482
55	0.05	1.0	1.0	6.0	1.0	4.0	2.0	0.1	true	0.9	0.0	true	1.0	1.0	0.0010	1.0E-4	2.0	5.0	1.0	ContinuousCorrelated	Kinesis	true	0.0	1.0	PoissonProcess	1000	0	1	land1100.csv	0	2039000708	true	500	0.5	0	5.0	1.0	0.01	1.0	false	0.0	0.4426682794199768	4.41872273127527E-5	1091.8704508731514	33.70304496650423	1.0924666038903021	2.3414718051257677	0.5019943364431975	-0.0030776573965156802
56	0.05	1.0	1.0	6.0	1.0	4.0	2.0	0.1	true	0.9	0.0	true	1.0	1.0	0.0010	1.0E-4	2.0	5.0	1.0	ContinuousCorrelated	Kinesis	true	0.0	1.0	PoissonProcess	1000	0	1	land1103.csv	0	2039003696	true	500	0.5	0	5.0	1.0	0.01	1.0	false	0.0	0.1632005682386416	9.43492121434453E-6	1442.7845306407269	137.95113020962177	1.443382332728217	2.131438622926083	0.5174196452158568	-0.0012802170102090974
57	0.05	1.0	1.0	6.0	1.0	4.0	2.0	0.1	true	0.9	0.0	true	1.0	1.0	0.0010	1.0E-4	2.0	5.0	1.0	ContinuousCorrelated	Kinesis	true	0.0	1.0	PoissonProcess	1000	0	1	land1162.csv	0	2039006823	true	500	0.5	0	5.0	1.0	0.01	1.0	false	0.0	0.2544893737641458	5.6399138483932126E-5	1778.9531609086787	90.56348597061226	1.779523188161889	2.3057851757045	0.5072137897078658	0.0014171121754928764
58	0.05	1.0	1.0	6.0	1.0	4.0	2.0	0.1	true	0.9	0.0	true	1.0	1.0	0.0010	1.0E-4	2.0	5.0	1.0	ContinuousCorrelated	Kinesis	true	0.0	1.0	PoissonProcess	1000	0	1	land1164.csv	0	2039009642	true	500	0.5	0	5.0	1.0	0.01	1.0	false	0.0	0.4109566224519215	5.725890071112845E-5	1415.886023628691	131.53627312217796	1.4164715145154931	2.432111888950441	0.48755823313013463	-0.001720839798182489
59	0.05	1.0	1.0	6.0	1.0	4.0	2.0	0.1	true	0.9	0.0	true	1.0	1.0	0.0010	1.0E-4	2.0	5.0	1.0	ContinuousCorrelated	Kinesis	true	0.0	1.0	PoissonProcess	1000	0	1	land1167.csv	0	2039012530	true	500	0.5	0	5.0	1.0	0.01	1.0	false	0.0	0.2075951510990712	9.309160703676808E-6	1088.2372993461145	50.83775780173238	1.0888076982447104	2.0989175106127673	0.4963317381741557	0.003722341150414892
60	0.05	1.0	1.0	6.0	1.0	4.0	2.0	0.1	true	0.9	0.0	true	1.0	1.0	0.0010	1.0E-4	2.0	5.0	1.0	ContinuousCorrelated	Kinesis	true	0.0	1.0	PoissonProcess	1000	0	1	land1218.csv	0	2039015594	true	500	0.5	0	5.0	1.0	0.01	1.0	false	0.0	0.4961459597288664	7.9253685832073E-5	1473.8068295223952	93.37351981110702	1.4743822168978296	2.339981877265503	0.49001466126277404	-0.0027000206548677816
61	0.05	1.0	1.0	6.0	1.0	4.0	2.0	0.1	true	0.9	0.0	true	1.0	1.0	0.0010	1.0E-4	2.0	5.0	1.0	ContinuousCorrelated	Kinesis	true	0.0	1.0	PoissonProcess	1000	0	1	land1220.csv	0	2039018393	true	500	0.5	0	5.0	1.0	0.01	1.0	false	0.0	0.24851661075451764	2.0562094064172274E-5	1226.8058324303813	41.70934244109313	1.2273895342135903	2.189120060848715	0.5159632643366571	0.005832788821640498
62	0.05	1.0	1.0	6.0	1.0	4.0	2.0	0.1	true	0.9	0.0	true	1.0	1.0	0.0010	1.0E-4	2.0	5.0	1.0	ContinuousCorrelated	Kinesis	true	0.0	1.0	PoissonProcess	1000	0	1	land1223.csv	0	2039021612	true	500	0.5	0	5.0	1.0	0.01	1.0	false	0.0	0.20914754721166307	9.34283518288496E-6	1164.6524928834813	57.388340828009405	1.1652520449559127	2.1870203423688235	0.5177370595507966	-2.8164704581333825E-6
63	0.05	1.0	1.0	6.0	1.0	4.0	2.0	0.1	true	0.9	0.0	true	1.0	1.0	0.0010	1.0E-4	2.0	5.0	1.0	ContinuousCorrelated	Kinesis	true	0.0	1.0	PoissonProcess	1000	0	1	land1282.csv	0	2039024824	true	500	0.5	0	5.0	1.0	0.01	1.0	false	0.0	0.10332093276396705	1.826693532205987E-5	1906.2674201381526	70.32072353035171	1.9068393308755278	2.340433039142143	0.4914193578346132	8.924320616533341E-4
64	0.05	1.0	1.0	6.0	1.0	4.0	2.0	0.1	true	0.9	0.0	true	1.0	1.0	0.0010	1.0E-4	2.0	5.0	1.0	ContinuousCorrelated	Kinesis	true	0.0	1.0	PoissonProcess	1000	0	1	land1284.csv	0	2039027828	true	500	0.5	0	5.0	1.0	0.01	1.0	false	0.0	0.32910988114754247	1.57503317296515E-5	820.4895818945414	42.233286978409296	0.8210609433684583	2.304523569338205	0.5336478071682751	-0.001988579564864335
65	0.05	1.0	1.0	6.0	1.0	4.0	2.0	0.1	true	0.9	0.0	true	1.0	1.0	0.0010	1.0E-4	2.0	5.0	1.0	ContinuousCorrelated	Kinesis	true	0.0	1.0	PoissonProcess	1000	0	1	land1287.csv	0	2039030891	true	500	0.5	0	5.0	1.0	0.01	1.0	false	0.0	0.23350796760100354	1.223578127600434E-5	991.4574592419344	61.68959396489479	0.9920527177974855	2.044049265783942	0.5316908011685675	-3.0802863590160173E-4
66	0.05	1.0	1.0	6.0	1.0	4.0	2.0	0.1	true	0.9	0.0	true	1.0	1.0	0.0010	1.0E-4	2.0	5.0	1.0	ContinuousCorrelated	Kinesis	true	0.0	1.0	PoissonProcess	1000	0	1	land1338.csv	0	2039033975	true	500	0.5	0	5.0	1.0	0.01	1.0	false	0.0	0.3512461298393658	6.698957803872331E-5	1527.687070124869	145.4921998587264	1.528263589858644	2.2717710198467027	0.5235757929761261	-0.004363992554821061
67	0.05	1.0	1.0	6.0	1.0	4.0	2.0	0.1	true	0.9	0.0	true	1.0	1.0	0.0010	1.0E-4	2.0	5.0	1.0	ContinuousCorrelated	Kinesis	true	0.0	1.0	PoissonProcess	1000	0	1	land1340.csv	0	2039036836	true	500	0.5	0	5.0	1.0	0.01	1.0	false	0.0	0.25483091357591187	2.5184721439814188E-5	1392.8186775193674	85.18712203827644	1.393418480907281	2.4203281631641116	0.5196994712210521	-5.802788188389975E-4
68	0.05	1.0	1.0	6.0	1.0	4.0	2.0	0.1	true	0.9	0.0	true	1.0	1.0	0.0010	1.0E-4	2.0	5.0	1.0	ContinuousCorrelated	Kinesis	true	0.0	1.0	PoissonProcess	1000	0	1	land1343.csv	0	2039040072	true	500	0.5	0	5.0	1.0	0.01	1.0	false	0.0	0.20129957254769315	8.166171688077462E-6	1155.6037324029642	47.90403798848165	1.1561811455327422	2.199650082805915	0.49379927804349727	-0.0013331523138158722
69	0.05	1.0	1.0	6.0	1.0	4.0	2.0	0.1	true	0.9	0.0	true	1.0	1.0	0.0010	1.0E-4	2.0	5.0	1.0	ContinuousCorrelated	Kinesis	true	0.0	1.0	PoissonProcess	1000	0	1	land1402.csv	0	2039043285	true	500	0.5	0	5.0	1.0	0.01	1.0	false	0.0	0.7363045453220026	1.8666952348354136E-4	1905.0081464992802	65.4172305234443	1.9055926676614627	2.418760053560518	0.5202495618880837	9.957656187425997E-4
70	0.05	1.0	1.0	6.0	1.0	4.0	2.0	0.1	true	0.9	0.0	true	1.0	1.0	0.0010	1.0E-4	2.0	5.0	1.0	ContinuousCorrelated	Kinesis	true	0.0	1.0	PoissonProcess	1000	0	1	land1404.csv	0	2039046109	true	500	0.5	0	5.0	1.0	0.01	1.0	false	0.0	0.3534127231432684	4.661840159682804E-5	1560.6544683347875	132.70419474483396	1.5612392883950978	2.5084077983611355	0.5012696123767392	-0.00565506970431277
71	0.05	1.0	1.0	6.0	1.0	4.0	2.0	0.1	true	0.9	0.0	true	1.0	1.0	0.0010	1.0E-4	2.0	5.0	1.0	ContinuousCorrelated	Kinesis	true	0.0	1.0	PoissonProcess	1000	0	1	land1407.csv	0	2039049189	true	500	0.5	0	5.0	1.0	0.01	1.0	false	0.0	0.17361099857152762	1.2487995224800377E-5	1482.1028434847462	81.52094476643477	1.4827023325963624	2.3493181284881124	0.5206289622257091	-0.0015861977974964952
72	0.05	1.0	1.0	6.0	1.0	4.0	2.0	0.1	true	0.9	0.0	true	1.0	1.0	0.0010	1.0E-4	2.0	5.0	1.0	ContinuousCorrelated	Kinesis	true	0.0	1.0	PoissonProcess	1000	0	1	land1458.csv	0	2039052302	true	500	0.5	0	5.0	1.0	0.01	1.0	false	0.0	0.35391744800952907	6.095026908626993E-5	1535.2984165332716	51.40775761608538	1.5358943946005672	2.3104340437637965	0.4892733356442927	-0.001542570111986587
73	0.05	1.0	1.0	6.0	1.0	4.0	2.0	0.1	true	0.9	0.0	true	1.0	1.0	0.0010	1.0E-4	2.0	5.0	1.0	ContinuousCorrelated	Kinesis	true	0.0	1.0	PoissonProcess	1000	0	1	land1460.csv	0	2039055132	true	500	0.5	0	5.0	1.0	0.01	1.0	false	0.0	0.28170224877313355	2.7302184794726207E-5	1200.3283021421162	1000.7446542106363	1.2009083237332852	2.12753033532342	0.5055768755122331	4.7287781343740475E-4
74	0.05	1.0	1.0	6.0	1.0	4.0	2.0	0.1	true	0.9	0.0	true	1.0	1.0	0.0010	1.0E-4	2.0	5.0	1.0	ContinuousCorrelated	Kinesis	true	0.0	1.0	PoissonProcess	1000	0	1	land1463.csv	0	2039058290	true	500	0.5	0	5.0	1.0	0.01	1.0	false	0.0	0.20341900443414365	7.980543218957975E-6	1103.28191163921	46.332261614830855	1.1038720217783673	1.976141174572509	0.5223592532489382	0.0072278259770147246
75	0.05	1.0	1.0	6.0	1.0	4.0	2.0	0.1	true	0.9	0.0	true	1.0	1.0	0.0010	1.0E-4	2.0	5.0	1.0	ContinuousCorrelated	Kinesis	true	0.0	1.0	PoissonProcess	1000	0	1	land1522.csv	0	2039061394	true	500	0.5	0	5.0	1.0	0.01	1.0	false	0.0	0.23804883721224052	5.633594720597252E-5	1861.0728025033502	166.2390339573398	1.8616525260712884	2.4062421735205946	0.48053620658528984	1.8321643456963715E-4
76	0.05	1.0	1.0	6.0	1.0	4.0	2.0	0.1	true	0.9	0.0	true	1.0	1.0	0.0010	1.0E-4	2.0	5.0	1.0	ContinuousCorrelated	Kinesis	true	0.0	1.0	PoissonProcess	1000	0	1	land1524.csv	0	2039064270	true	500	0.5	0	5.0	1.0	0.01	1.0	false	0.0	0.1791863432968009	1.6482102320209223E-5	1428.2737030864487	112.69773649605601	1.4288527295610005	2.2104915705079273	0.49974777329424835	8.812250737853993E-4
77	0.05	1.0	1.0	6.0	1.0	4.0	2.0	0.1	true	0.9	0.0	true	1.0	1.0	0.0010	1.0E-4	2.0	5.0	1.0	ContinuousCorrelated	Kinesis	true	0.0	1.0	PoissonProcess	1000	0	1	land1527.csv	0	2039067249	true	500	0.5	0	5.0	1.0	0.01	1.0	false	0.0	0.20403949209514197	1.2157542940062073E-5	1241.5291670357988	187.6441863199591	1.2421264129408067	2.3205920766471295	0.5249449509289694	0.006967765116065897
78	0.05	1.0	1.0	6.0	1.0	4.0	2.0	0.1	true	0.9	0.0	true	1.0	1.0	0.0010	1.0E-4	2.0	5.0	1.0	ContinuousCorrelated	Kinesis	true	0.0	1.0	PoissonProcess	1000	0	1	land1578.csv	0	2039070444	true	500	0.5	0	5.0	1.0	0.01	1.0	false	0.0	0.6002025822398567	8.634881659914301E-5	1323.7373703682042	60.59611581476492	1.3243230812959483	2.4622046052625137	0.5276899436396536	-0.0027392531272223135
79	0.05	1.0	1.0	6.0	1.0	4.0	2.0	0.1	true	0.9	0.0	true	1.0	1.0	0.0010	1.0E-4	2.0	5.0	1.0	ContinuousCorrelated	Kinesis	true	0.0	1.0	PoissonProcess	1000	0	1	land1580.csv	0	2039073208	true	500	0.5	0	5.0	1.0	0.01	1.0	false	0.0	0.36426502819158446	3.265459439268797E-5	1123.793824617682	136.28061725574483	1.12439375151088	2.3294782247386183	0.4955344213179236	0.0022082762356964224
80	0.05	1.0	1.0	6.0	1.0	4.0	2.0	0.1	true	0.9	0.0	true	1.0	1.0	0.0010	1.0E-4	2.0	5.0	1.0	ContinuousCorrelated	Kinesis	true	0.0	1.0	PoissonProcess	1000	0	1	land1583.csv	0	2039076310	true	500	0.5	0	5.0	1.0	0.01	1.0	false	0.0	0.2179112192006728	8.922045745890781E-6	1054.408657839743	39.74617840178969	1.0550016968122378	2.071014201989988	0.5167653031407436	8.821651922737489E-4
81	0.05	1.0	1.0	6.0	1.0	4.0	2.0	0.1	true	0.9	0.0	true	1.0	1.0	0.0010	1.0E-4	2.0	5.0	1.0	ContinuousCorrelated	Kinesis	true	0.0	1.0	PoissonProcess	1000	0	1	land1642.csv	0	2039079351	true	500	0.5	0	5.0	1.0	0.01	1.0	false	0.0	0.3665857565038726	1.0720828836359156E-4	1809.238347661625	68.63700173326846	1.8098229408016777	2.247789100146859	0.5296009504992379	-0.002063414569447594
82	0.05	1.0	1.0	6.0	1.0	4.0	2.0	0.1	true	0.9	0.0	true	1.0	1.0	0.0010	1.0E-4	2.0	5.0	1.0	ContinuousCorrelated	Kinesis	true	0.0	1.0	PoissonProcess	1000	0	1	land1644.csv	0	2039082117	true	500	0.5	0	5.0	1.0	0.01	1.0	false	0.0	0.3948597064894493	5.1044941796678074E-5	1342.7046122342272	84.9350709354232	1.3433013100875668	2.240495170597599	0.5184340179871638	-4.326756590744517E-4
83	0.05	1.0	1.0	6.0	1.0	4.0	2.0	0.1	true	0.9	0.0	true	1.0	1.0	0.0010	1.0E-4	2.0	5.0	1.0	ContinuousCorrelated	Kinesis	true	0.0	1.0	PoissonProcess	1000	0	1	land1647.csv	0	2039085001	true	500	0.5	0	5.0	1.0	0.01	1.0	false	0.0	0.20180845711631656	5.9290940764144005E-6	1087.7285857783938	50.38740373868973	1.08832819971778	2.0849178315960777	0.5164733369811976	-0.005013420125202629
84	0.05	1.0	1.0	6.0	1.0	4.0	2.0	0.1	true	0.9	0.0	true	1.0	1.0	0.0010	1.0E-4	2.0	5.0	1.0	ContinuousCorrelated	Kinesis	true	0.0	1.0	PoissonProcess	1000	0	1	land1698.csv	0	2039088172	true	500	0.5	0	5.0	1.0	0.01	1.0	false	0.0	0.45318433464149127	7.755701218618845E-5	1459.1069193469746	49.65002950313642	1.4596873186161115	2.2871669870355813	0.5091702779262788	4.4158977122762033E-4
85	0.05	1.0	1.0	6.0	1.0	4.0	2.0	0.1	true	0.9	0.0	true	1.0	1.0	0.0010	1.0E-4	2.0	5.0	1.0	ContinuousCorrelated	Kinesis	true	0.0	1.0	PoissonProcess	1000	0	1	land1700.csv	0	2039091040	true	500	0.5	0	5.0	1.0	0.01	1.0	false	0.0	0.2557924562928616	2.3481082846641796E-5	1283.4373422572853	76.69936692411143	1.2840138251992845	2.400699514640002	0.5006047563607429	0.003519492042236972
86	0.05	1.0	1.0	6.0	1.0	4.0	2.0	0.1	true	0.9	0.0	true	1.0	1.0	0.0010	1.0E-4	2.0	5.0	1.0	ContinuousCorrelated	Kinesis	true	0.0	1.0	PoissonProcess	1000	0	1	land1703.csv	0	2039094115	true	500	0.5	0	5.0	1.0	0.01	1.0	false	0.0	0.2011622065622603	9.01835748402749E-6	1122.4710060741425	46.14820158852296	1.1230519489133135	1.9956729111443894	0.5196563985749039	0.001155231290535067
87	0.05	1.0	1.0	6.0	1.0	4.0	2.0	0.1	true	0.9	0.0	true	1.0	1.0	0.0010	1.0E-4	2.0	5.0	1.0	ContinuousCorrelated	Kinesis	true	0.0	1.0	PoissonProcess	1000	0	1	land1762.csv	0	2039097372	true	500	0.5	0	5.0	1.0	0.01	1.0	false	0.0	0.3474296877554274	5.9041317241564574E-5	1652.7330402504836	145.08258249191397	1.6533030684624057	2.3824236910005645	0.5162332058760339	0.0011299336331585187
88	0.05	1.0	1.0	6.0	1.0	4.0	2.0	0.1	true	0.9	0.0	true	1.0	1.0	0.0010	1.0E-4	2.0	5.0	1.0	ContinuousCorrelated	Kinesis	true	0.0	1.0	PoissonProcess	1000	0	1	land1764.csv	0	2039100102	true	500	0.5	0	5.0	1.0	0.01	1.0	false	0.0	0.2521507534173143	2.638287032241701E-5	1375.5720435392022	193.13605227791544	1.3761638826597518	2.3839870627776185	0.49879592899934416	-6.73865967837398E-4
89	0.05	1.0	1.0	6.0	1.0	4.0	2.0	0.1	true	0.9	0.0	true	1.0	1.0	0.0010	1.0E-4	2.0	5.0	1.0	ContinuousCorrelated	Kinesis	true	0.0	1.0	PoissonProcess	1000	0	1	land1767.csv	0	2039103243	true	500	0.5	0	5.0	1.0	0.01	1.0	false	0.0	0.26675940111050217	1.5257028833977122E-5	1017.0567853540881	39.76951337972142	1.0176562712774873	2.247813725695352	0.5151975927124374	-0.007327672927941612
90	0.05	1.0	1.0	6.0	1.0	4.0	2.0	0.1	true	0.9	0.0	true	1.0	1.0	0.0010	1.0E-4	2.0	5.0	1.0	ContinuousCorrelated	Kinesis	true	0.0	1.0	PoissonProcess	1000	0	1	land1818.csv	0	2039106259	true	500	0.5	0	5.0	1.0	0.01	1.0	false	0.0	0.34305302030758383	5.3864447146543646E-5	1429.6224509495821	62.83004597287822	1.4301965222441688	2.236673282738939	0.46963393020877403	0.0037800378765381155
91	0.05	1.0	1.0	6.0	1.0	4.0	2.0	0.1	true	0.9	0.0	true	1.0	1.0	0.0010	1.0E-4	2.0	5.0	1.0	ContinuousCorrelated	Kinesis	true	0.0	1.0	PoissonProcess	1000	0	1	land1820.csv	0	2039109132	true	500	0.5	0	5.0	1.0	0.01	1.0	false	0.0	0.2706867544092943	2.2340540612184308E-5	1104.8410200859555	43.38441247234638	1.1054409901244495	2.1646176046061236	0.5010765107131193	0.001200901455299257
92	0.05	1.0	1.0	6.0	1.0	4.0	2.0	0.1	true	0.9	0.0	true	1.0	1.0	0.0010	1.0E-4	2.0	5.0	1.0	ContinuousCorrelated	Kinesis	true	0.0	1.0	PoissonProcess	1000	0	1	land1823.csv	0	2039112299	true	500	0.5	0	5.0	1.0	0.01	1.0	false	0.0	0.1930368965052738	9.186942241042744E-6	1195.5713416415813	111.81621844873702	1.1961443850052127	2.1164387771198623	0.509218392707281	0.0024346318372189457
93	0.05	1.0	1.0	6.0	1.0	4.0	2.0	0.1	true	0.9	0.0	true	1.0	1.0	0.0010	1.0E-4	2.0	5.0	1.0	ContinuousCorrelated	Kinesis	true	0.0	1.0	PoissonProcess	1000	0	1	land1882.csv	0	2039115579	true	500	0.5	0	5.0	1.0	0.01	1.0	false	0.0	0.4969701718655266	2.1460878925295076E-4	2029.5165699822292	119.94458173414094	2.030091233277961	2.283650404473684	0.55050501010782	-6.0523271279011234E-5
94	0.05	1.0	1.0	6.0	1.0	4.0	2.0	0.1	true	0.9	0.0	true	1.0	1.0	0.0010	1.0E-4	2.0	5.0	1.0	ContinuousCorrelated	Kinesis	true	0.0	1.0	PoissonProcess	1000	0	1	land1884.csv	0	2039118354	true	500	0.5	0	5.0	1.0	0.01	1.0	false	0.0	0.36123676632296264	4.186412361506571E-5	1131.9234725144786	39.41576682866215	1.1324950204917823	1.9500659575233688	0.5484356865965938	0.002554782202371116
95	0.05	1.0	1.0	6.0	1.0	4.0	2.0	0.1	true	0.9	0.0	true	1.0	1.0	0.0010	1.0E-4	2.0	5.0	1.0	ContinuousCorrelated	Kinesis	true	0.0	1.0	PoissonProcess	1000	0	1	land1887.csv	0	2039121198	true	500	0.5	0	5.0	1.0	0.01	1.0	false	0.0	0.19844381571923894	6.394777043191293E-6	1269.1474404898993	75.44721861870042	1.2697472513773014	2.2498553436952236	0.5027820953566882	0.005454013663768304
96	0.05	1.0	1.0	6.0	1.0	4.0	2.0	0.1	true	0.9	0.0	true	1.0	1.0	0.0010	1.0E-4	2.0	5.0	1.0	ContinuousCorrelated	Kinesis	true	0.0	1.0	PoissonProcess	1000	0	1	land1938.csv	0	2039124382	true	500	0.5	0	5.0	1.0	0.01	1.0	false	0.0	0.26589519356561553	6.587766258146351E-5	1865.1143675742028	66.90701984175519	1.8657063778218366	2.464731111114433	0.503930020140298	0.0016663843310729635
97	0.05	1.0	1.0	6.0	1.0	4.0	2.0	0.1	true	0.9	0.0	true	1.0	1.0	0.0010	1.0E-4	2.0	5.0	1.0	ContinuousCorrelated	Kinesis	true	0.0	1.0	PoissonProcess	1000	0	1	land1940.csv	0	2039127142	true	500	0.5	0	5.0	1.0	0.01	1.0	false	0.0	0.3323617287695841	2.9558623145920875E-5	1123.441424251517	60.99740792188201	1.1240386073361308	2.182759177187106	0.5178424137793808	0.0031849885061104514
98	0.05	1.0	1.0	6.0	1.0	4.0	2.0	0.1	true	0.9	0.0	true	1.0	1.0	0.0010	1.0E-4	2.0	5.0	1.0	ContinuousCorrelated	Kinesis	true	0.0	1.0	PoissonProcess	1000	0	1	land1943.csv	0	2039130306	true	500	0.5	0	5.0	1.0	0.01	1.0	false	0.0	0.2129070039687076	1.0075789013516085E-5	1079.3371203486747	79.66007509097143	1.0799097604152315	1.986354113415062	0.5438901525623657	7.957907360564027E-4
99	0.05	1.0	1.0	6.0	1.0	4.0	2.0	0.1	true	0.9	0.0	true	1.0	1.0	0.0010	1.0E-4	2.0	5.0	1.0	ContinuousCorrelated	Kinesis	true	0.0	1.0	PoissonProcess	1000	0	1	land2002.csv	0	2039133636	true	500	0.5	0	5.0	1.0	0.01	1.0	false	0.0	0.5167260014053094	1.276218921829706E-4	1955.9699398866057	121.70775762024867	1.9565410217136197	2.4831593522166195	0.5218247879596453	2.4320970927957345E-4
100	0.05	1.0	1.0	6.0	1.0	4.0	2.0	0.1	true	0.9	0.0	true	1.0	1.0	0.0010	1.0E-4	2.0	5.0	1.0	ContinuousCorrelated	Kinesis	true	0.0	1.0	PoissonProcess	1000	0	1	land2004.csv	0	2039136504	true	500	0.5	0	5.0	1.0	0.01	1.0	false	0.0	0.27827588075019233	9.693404068874334E-5	2171.4622637289713	78.63911061990176	2.1720414056475246	2.523569243063991	0.513690241254554	-0.003953434244389287
101	0.05	1.0	1.0	6.0	1.0	4.0	2.0	0.1	true	0.9	0.0	true	1.0	1.0	0.0010	1.0E-4	2.0	5.0	1.0	ContinuousCorrelated	Kinesis	true	0.0	1.0	PoissonProcess	1000	0	1	land2007.csv	0	2039139300	true	500	0.5	0	5.0	1.0	0.01	1.0	false	0.0	0.205275927087358	8.854961779756155E-6	1163.4664634286364	55.90984684695856	1.1640493302762138	2.209249236905001	0.5152461467448891	0.0021422388981165415
102	0.05	1.0	1.0	6.0	1.0	4.0	2.0	0.1	true	0.9	0.0	true	1.0	1.0	0.0010	1.0E-4	2.0	5.0	1.0	ContinuousCorrelated	Kinesis	true	0.0	1.0	PoissonProcess	1000	0	1	land2058.csv	0	2039142495	true	500	0.5	0	5.0	1.0	0.01	1.0	false	0.0	0.43143923038118287	6.893176375372198E-5	1328.1478396988823	140.5202220820482	1.328721166215632	2.157888111644047	0.4875276252854417	-3.020314126276026E-4
103	0.05	1.0	1.0	6.0	1.0	4.0	2.0	0.1	true	0.9	0.0	true	1.0	1.0	0.0010	1.0E-4	2.0	5.0	1.0	ContinuousCorrelated	Kinesis	true	0.0	1.0	PoissonProcess	1000	0	1	land2060.csv	0	2039145271	true	500	0.5	0	5.0	1.0	0.01	1.0	false	0.0	0.29704596416936513	2.7712204894609002E-5	1268.7620389824604	263.694359478561	1.2693556018119745	2.366234953836666	0.5393206433358552	0.002961772834665693
104	0.05	1.0	1.0	6.0	1.0	4.0	2.0	0.1	true	0.9	0.0	true	1.0	1.0	0.0010	1.0E-4	2.0	5.0	1.0	ContinuousCorrelated	Kinesis	true	0.0	1.0	PoissonProcess	1000	0	1	land2063.csv	0	2039148423	true	500	0.5	0	5.0	1.0	0.01	1.0	false	0.0	0.2024600328135388	9.263813320932406E-6	1196.8874151826149	83.55944698294178	1.1974744979051155	2.3845123222474363	0.5104393441256848	0.002580631460096272
105	0.05	1.0	1.0	6.0	1.0	4.0	2.0	0.1	true	0.9	0.0	true	1.0	1.0	0.0010	1.0E-4	2.0	5.0	1.0	ContinuousCorrelated	Kinesis	true	0.0	1.0	PoissonProcess	1000	0	1	land2122.csv	0	2039151774	true	500	0.5	0	5.0	1.0	0.01	1.0	false	0.0	0.44649361535938237	1.2296010713272343E-4	1871.8368308922468	110.2913896931653	1.8724280309087127	2.412155614292385	0.5210288329900923	0.003702620025807756
106	0.05	1.0	1.0	6.0	1.0	4.0	2.0	0.1	true	0.9	0.0	true	1.0	1.0	0.0010	1.0E-4	2.0	5.0	1.0	ContinuousCorrelated	Kinesis	true	0.0	1.0	PoissonProcess	1000	0	1	land2124.csv	0	2039154735	true	500	0.5	0	5.0	1.0	0.01	1.0	false	0.0	0.4426072692861469	6.131000089495144E-5	1350.4993875218956	136.60753949846867	1.3510820347550005	2.242619304062385	0.5181758431196642	-0.0034610682320639816
107	0.05	1.0	1.0	6.0	1.0	4.0	2.0	0.1	true	0.9	0.0	true	1.0	1.0	0.0010	1.0E-4	2.0	5.0	1.0	ContinuousCorrelated	Kinesis	true	0.0	1.0	PoissonProcess	1000	0	1	land2127.csv	0	2039157503	true	500	0.5	0	5.0	1.0	0.01	1.0	false	0.0	0.1761306954529077	8.262375756277149E-6	1241.3532152180455	78.08248699555317	1.2419514100309526	2.0736679270150735	0.5158546342933641	8.236067440304263E-4
108	0.05	1.0	1.0	6.0	1.0	4.0	2.0	0.1	true	0.9	0.0	true	1.0	1.0	0.0010	1.0E-4	2.0	5.0	1.0	ContinuousCorrelated	Kinesis	true	0.0	1.0	PoissonProcess	1000	0	1	land2178.csv	0	2039160864	true	500	0.5	0	5.0	1.0	0.01	1.0	false	0.0	0.3311545430053422	5.686118628536736E-5	1641.9617686526667	74.50164845408243	1.6425615881182505	2.4072451165888067	0.49696900249799253	-0.0019759948659575114
109	0.05	1.0	1.0	6.0	1.0	4.0	2.0	0.1	true	0.9	0.0	true	1.0	1.0	0.0010	1.0E-4	2.0	5.0	1.0	ContinuousCorrelated	Kinesis	true	0.0	1.0	PoissonProcess	1000	0	1	land2180.csv	0	2039163792	true	500	0.5	0	5.0	1.0	0.01	1.0	false	0.0	0.2868093853215183	2.477947416702209E-5	1161.7292963055604	43.75380758102686	1.162308415455983	2.2083199588580507	0.5190248306247369	0.0064730814524180235
110	0.05	1.0	1.0	6.0	1.0	4.0	2.0	0.1	true	0.9	0.0	true	1.0	1.0	0.0010	1.0E-4	2.0	5.0	1.0	ContinuousCorrelated	Kinesis	true	0.0	1.0	PoissonProcess	1000	0	1	land2183.csv	0	2039166919	true	500	0.5	0	5.0	1.0	0.01	1.0	false	0.0	0.21450050221057876	9.160140227859373E-6	1151.896083479568	145.54220122794922	1.1524944648196134	2.322808128497754	0.5292239696040493	0.006066444755615189
111	0.05	1.0	1.0	6.0	1.0	4.0	2.0	0.1	true	0.9	0.0	true	1.0	1.0	0.0010	1.0E-4	2.0	5.0	1.0	ContinuousCorrelated	Kinesis	true	0.0	1.0	PoissonProcess	1000	0	1	land2242.csv	0	2039170374	true	500	0.5	0	5.0	1.0	0.01	1.0	false	0.0	0.5309760115176819	1.542244245711485E-4	1817.0653403834049	74.33019770506398	1.8176645261608428	2.3564464633625093	0.44992863886971435	0.005225230650700849
112	0.05	1.0	1.0	6.0	1.0	4.0	2.0	0.1	true	0.9	0.0	true	1.0	1.0	0.0010	1.0E-4	2.0	5.0	1.0	ContinuousCorrelated	Kinesis	true	0.0	1.0	PoissonProcess	1000	0	1	land2244.csv	0	2039173242	true	500	0.5	0	5.0	1.0	0.01	1.0	false	0.0	0.2982951378252272	2.8351220734646958E-5	1289.0274603934045	224.7886785566545	1.2896059322907105	2.396557788550143	0.523859672733132	-0.0017376717608955836
113	0.05	1.0	1.0	6.0	1.0	4.0	2.0	0.1	true	0.9	0.0	true	1.0	1.0	0.0010	1.0E-4	2.0	5.0	1.0	ContinuousCorrelated	Kinesis	true	0.0	1.0	PoissonProcess	1000	0	1	land2247.csv	0	2039176389	true	500	0.5	0	5.0	1.0	0.01	1.0	false	0.0	0.21075860365670435	7.947841836672283E-6	1020.3399400500391	85.75221281280764	1.020924787178859	1.9865606585804745	0.5444521290081714	-0.0037816347790543127
114	0.05	1.0	1.0	6.0	1.0	4.0	2.0	0.1	true	0.9	0.0	true	1.0	1.0	0.0010	1.0E-4	2.0	5.0	1.0	ContinuousCorrelated	Kinesis	true	0.0	1.0	PoissonProcess	1000	0	1	land2298.csv	0	2039179878	true	500	0.5	0	5.0	1.0	0.01	1.0	false	0.0	0.33776034764112045	5.441653915196266E-5	1548.1536558772723	254.1270151700188	1.5487501654365288	2.4654461654666835	0.48682324288918555	1.82360314709857E-4
115	0.05	1.0	1.0	6.0	1.0	4.0	2.0	0.1	true	0.9	0.0	true	1.0	1.0	0.0010	1.0E-4	2.0	5.0	1.0	ContinuousCorrelated	Kinesis	true	0.0	1.0	PoissonProcess	1000	0	1	land2300.csv	0	2039182772	true	500	0.5	0	5.0	1.0	0.01	1.0	false	0.0	0.2262203828986669	2.36565937289432E-5	1398.3107456372577	112.50303669052157	1.3989077550716027	2.25199037868823	0.4963150882650481	0.0011852599082392925
116	0.05	1.0	1.0	6.0	1.0	4.0	2.0	0.1	true	0.9	0.0	true	1.0	1.0	0.0010	1.0E-4	2.0	5.0	1.0	ContinuousCorrelated	Kinesis	true	0.0	1.0	PoissonProcess	1000	0	1	land2303.csv	0	2039185863	true	500	0.5	0	5.0	1.0	0.01	1.0	false	0.0	0.18861483117058528	8.11664048350811E-6	1228.344309516773	49.73273172687366	1.2289416463200322	2.071756922889086	0.5098309099738593	0.0021921410510254698
117	0.05	1.0	1.0	6.0	1.0	4.0	2.0	0.1	true	0.9	0.0	true	1.0	1.0	0.0010	1.0E-4	2.0	5.0	1.0	ContinuousCorrelated	Kinesis	true	0.0	1.0	PoissonProcess	1000	0	1	land2362.csv	0	2039189039	true	500	0.5	0	5.0	1.0	0.01	1.0	false	0.0	0.17616115243912941	3.568397864951622E-5	1862.6173512401906	272.0202159176522	1.8631944900144422	2.424454141233277	0.5095457440349337	0.005609958532114808
118	0.05	1.0	1.0	6.0	1.0	4.0	2.0	0.1	true	0.9	0.0	true	1.0	1.0	0.0010	1.0E-4	2.0	5.0	1.0	ContinuousCorrelated	Kinesis	true	0.0	1.0	PoissonProcess	1000	0	1	land2364.csv	0	2039192042	true	500	0.5	0	5.0	1.0	0.01	1.0	false	0.0	0.3358234921585667	5.371639469458825E-5	1611.733349049793	111.69168945478114	1.612325791855508	2.4004120028245866	0.4889732180341909	0.0017024760493339673
119	0.05	1.0	1.0	6.0	1.0	4.0	2.0	0.1	true	0.9	0.0	true	1.0	1.0	0.0010	1.0E-4	2.0	5.0	1.0	ContinuousCorrelated	Kinesis	true	0.0	1.0	PoissonProcess	1000	0	1	land2367.csv	0	2039194847	true	500	0.5	0	5.0	1.0	0.01	1.0	false	0.0	0.2035006485181219	7.4816946304815E-6	1026.3146211057845	36.431326333172926	1.0269145931979968	1.9906667570919234	0.5414153828153463	-8.936710456666294E-4
120	0.05	1.0	1.0	6.0	1.0	4.0	2.0	0.1	true	0.9	0.0	true	1.0	1.0	0.0010	1.0E-4	2.0	5.0	1.0	ContinuousCorrelated	SingleState	true	0.0	1.0	PoissonProcess	1000	0	1	land18.csv	0	2039197849	true	500	0.5	0	5.0	1.0	0.01	1.0	false	0.0	0.1298460665742372	3.638249293733482E-5	2603.6003450556473	139.838733097516	2.6041999745054105	0.0	0.0	6.572849795300182E-4
121	0.05	1.0	1.0	6.0	1.0	4.0	2.0	0.1	true	0.9	0.0	true	1.0	1.0	0.0010	1.0E-4	2.0	5.0	1.0	ContinuousCorrelated	SingleState	true	0.0	1.0	PoissonProcess	1000	0	1	land20.csv	0	2039200818	true	500	0.5	0	5.0	1.0	0.01	1.0	false	0.0	0.18021992582613905	2.5558514534386738E-5	2456.290232560214	110.34455410074048	2.456862661021333	0.0	0.0	-8.224528132169469E-4
122	0.05	1.0	1.0	6.0	1.0	4.0	2.0	0.1	true	0.9	0.0	true	1.0	1.0	0.0010	1.0E-4	2.0	5.0	1.0	ContinuousCorrelated	SingleState	true	0.0	1.0	PoissonProcess	1000	0	1	land23.csv	0	2039203998	true	500	0.5	0	5.0	1.0	0.01	1.0	false	0.0	0.18944556366039636	1.16022734481106E-5	2443.098619247156	226.39965810447035	2.443692274460001	0.0	0.0	-0.0015622490399168675
123	0.05	1.0	1.0	6.0	1.0	4.0	2.0	0.1	true	0.9	0.0	true	1.0	1.0	0.0010	1.0E-4	2.0	5.0	1.0	ContinuousCorrelated	SingleState	true	0.0	1.0	PoissonProcess	1000	0	1	land82.csv	0	2039207178	true	500	0.5	0	5.0	1.0	0.01	1.0	false	0.0	0.18534467591894618	6.949830671895422E-5	2545.980573916239	75.79976983891146	2.5465751670919645	0.0	0.0	0.0030467846751301253
124	0.05	1.0	1.0	6.0	1.0	4.0	2.0	0.1	true	0.9	0.0	true	1.0	1.0	0.0010	1.0E-4	2.0	5.0	1.0	ContinuousCorrelated	SingleState	true	0.0	1.0	PoissonProcess	1000	0	1	land84.csv	0	2039210060	true	500	0.5	0	5.0	1.0	0.01	1.0	false	0.0	0.15326755104578346	2.61445028084511E-5	2366.811707572087	140.7535290920374	2.367385846430034	0.0	0.0	0.004828370226586331
125	0.05	1.0	1.0	6.0	1.0	4.0	2.0	0.1	true	0.9	0.0	true	1.0	1.0	0.0010	1.0E-4	2.0	5.0	1.0	ContinuousCorrelated	SingleState	true	0.0	1.0	PoissonProcess	1000	0	1	land87.csv	0	2039213323	true	500	0.5	0	5.0	1.0	0.01	1.0	false	0.0	0.19968641472191032	1.3133335083322864E-5	2457.665876386136	152.19798297223159	2.458263812809765	0.0	0.0	0.0019032427846630824
126	0.05	1.0	1.0	6.0	1.0	4.0	2.0	0.1	true	0.9	0.0	true	1.0	1.0	0.0010	1.0E-4	2.0	5.0	1.0	ContinuousCorrelated	SingleState	true	0.0	1.0	PoissonProcess	1000	0	1	land138.csv	0	2039216415	true	500	0.5	0	5.0	1.0	0.01	1.0	false	0.0	0.20705413756124244	6.346970758714049E-5	2429.9126519920023	103.8600282004647	2.4304826758612754	0.0	0.0	6.051827072080302E-4
127	0.05	1.0	1.0	6.0	1.0	4.0	2.0	0.1	true	0.9	0.0	true	1.0	1.0	0.0010	1.0E-4	2.0	5.0	1.0	ContinuousCorrelated	SingleState	true	0.0	1.0	PoissonProcess	1000	0	1	land140.csv	0	2039219316	true	500	0.5	0	5.0	1.0	0.01	1.0	false	0.0	0.18916191400819524	2.6764254641470605E-5	2369.1339459110245	108.5663738411123	2.3697242640180916	0.0	0.0	0.0025151572900629915
128	0.05	1.0	1.0	6.0	1.0	4.0	2.0	0.1	true	0.9	0.0	true	1.0	1.0	0.0010	1.0E-4	2.0	5.0	1.0	ContinuousCorrelated	SingleState	true	0.0	1.0	PoissonProcess	1000	0	1	land143.csv	0	2039222466	true	500	0.5	0	5.0	1.0	0.01	1.0	false	0.0	0.18411018966993808	1.0954877292366195E-5	2348.2743389161196	132.46494399683527	2.348868970167267	0.0	0.0	-0.0013276376937652818
129	0.05	1.0	1.0	6.0	1.0	4.0	2.0	0.1	true	0.9	0.0	true	1.0	1.0	0.0010	1.0E-4	2.0	5.0	1.0	ContinuousCorrelated	SingleState	true	0.0	1.0	PoissonProcess	1000	0	1	land202.csv	0	2039225603	true	500	0.5	0	5.0	1.0	0.01	1.0	false	0.0	0.081341990416791	5.197850754522931E-5	2428.0940972481953	293.8475492941845	2.428665879036018	0.0	0.0	-0.003295000160075556
130	0.05	1.0	1.0	6.0	1.0	4.0	2.0	0.1	true	0.9	0.0	true	1.0	1.0	0.0010	1.0E-4	2.0	5.0	1.0	ContinuousCorrelated	SingleState	true	0.0	1.0	PoissonProcess	1000	0	1	land204.csv	0	2039228384	true	500	0.5	0	5.0	1.0	0.01	1.0	false	0.0	0.17918384535345647	3.5630510109623646E-5	2451.909630719274	105.42458863901531	2.452479656487143	0.0	0.0	0.0025537314227927718
131	0.05	1.0	1.0	6.0	1.0	4.0	2.0	0.1	true	0.9	0.0	true	1.0	1.0	0.0010	1.0E-4	2.0	5.0	1.0	ContinuousCorrelated	SingleState	true	0.0	1.0	PoissonProcess	1000	0	1	land207.csv	0	2039231398	true	500	0.5	0	5.0	1.0	0.01	1.0	false	0.0	0.20406477961495625	1.6499523264755004E-5	2367.229611860186	156.6446178293532	2.36780093370358	0.0	0.0	1.6821447100662538E-4
132	0.05	1.0	1.0	6.0	1.0	4.0	2.0	0.1	true	0.9	0.0	true	1.0	1.0	0.0010	1.0E-4	2.0	5.0	1.0	ContinuousCorrelated	SingleState	true	0.0	1.0	PoissonProcess	1000	0	1	land258.csv	0	2039234507	true	500	0.5	0	5.0	1.0	0.01	1.0	false	0.0	0.24607431383673886	6.750309998869481E-5	2684.3029273032985	118.84819872091916	2.6849027862804475	0.0	0.0	-0.0021978557237795427
133	0.05	1.0	1.0	6.0	1.0	4.0	2.0	0.1	true	0.9	0.0	true	1.0	1.0	0.0010	1.0E-4	2.0	5.0	1.0	ContinuousCorrelated	SingleState	true	0.0	1.0	PoissonProcess	1000	0	1	land260.csv	0	2039237376	true	500	0.5	0	5.0	1.0	0.01	1.0	false	0.0	0.17682015235063434	2.700074861870575E-5	2443.2044939047564	163.90598422505386	2.443778526793486	0.0	0.0	0.0025245560331528857
134	0.05	1.0	1.0	6.0	1.0	4.0	2.0	0.1	true	0.9	0.0	true	1.0	1.0	0.0010	1.0E-4	2.0	5.0	1.0	ContinuousCorrelated	SingleState	true	0.0	1.0	PoissonProcess	1000	0	1	land263.csv	0	2039240440	true	500	0.5	0	5.0	1.0	0.01	1.0	false	0.0	0.1857208490796246	1.0985085363913486E-5	2425.5779476647335	149.163879245678	2.426167316764675	0.0	0.0	0.0011637516812350102
135	0.05	1.0	1.0	6.0	1.0	4.0	2.0	0.1	true	0.9	0.0	true	1.0	1.0	0.0010	1.0E-4	2.0	5.0	1.0	ContinuousCorrelated	SingleState	true	0.0	1.0	PoissonProcess	1000	0	1	land322.csv	0	2039243638	true	500	0.5	0	5.0	1.0	0.01	1.0	false	0.0	0.1719351038977088	5.298369641715911E-5	2522.49294666047	126.40296601879125	2.5230676173194135	0.0	0.0	-0.0018817282667361057
136	0.05	1.0	1.0	6.0	1.0	4.0	2.0	0.1	true	0.9	0.0	true	1.0	1.0	0.0010	1.0E-4	2.0	5.0	1.0	ContinuousCorrelated	SingleState	true	0.0	1.0	PoissonProcess	1000	0	1	land324.csv	0	2039246558	true	500	0.5	0	5.0	1.0	0.01	1.0	false	0.0	0.1937203173975587	3.776073185957122E-5	2448.989396536933	106.92911751169096	2.4495839425068016	0.0	0.0	-0.0011063431983441827
137	0.05	1.0	1.0	6.0	1.0	4.0	2.0	0.1	true	0.9	0.0	true	1.0	1.0	0.0010	1.0E-4	2.0	5.0	1.0	ContinuousCorrelated	SingleState	true	0.0	1.0	PoissonProcess	1000	0	1	land327.csv	0	2039249516	true	500	0.5	0	5.0	1.0	0.01	1.0	false	0.0	0.18170902654181847	9.012574694954173E-6	2484.4103712194774	460.49070202508943	2.4849997400544748	0.0	0.0	-1.5276255588707918E-4
138	0.05	1.0	1.0	6.0	1.0	4.0	2.0	0.1	true	0.9	0.0	true	1.0	1.0	0.0010	1.0E-4	2.0	5.0	1.0	ContinuousCorrelated	SingleState	true	0.0	1.0	PoissonProcess	1000	0	1	land378.csv	0	2039252645	true	500	0.5	0	5.0	1.0	0.01	1.0	false	0.0	0.19077253852930873	5.9636442560124E-5	2508.3963955514946	96.8941725354479	2.508985647976874	0.0	0.0	-0.004022576632290548
139	0.05	1.0	1.0	6.0	1.0	4.0	2.0	0.1	true	0.9	0.0	true	1.0	1.0	0.0010	1.0E-4	2.0	5.0	1.0	ContinuousCorrelated	SingleState	true	0.0	1.0	PoissonProcess	1000	0	1	land380.csv	0	2039255479	true	500	0.5	0	5.0	1.0	0.01	1.0	false	0.0	0.2081651872897886	2.9053811109720443E-5	2394.792152984972	133.23173108497133	2.3953701036855612	0.0	0.0	3.633457294549676E-4
140	0.05	1.0	1.0	6.0	1.0	4.0	2.0	0.1	true	0.9	0.0	true	1.0	1.0	0.0010	1.0E-4	2.0	5.0	1.0	ContinuousCorrelated	SingleState	true	0.0	1.0	PoissonProcess	1000	0	1	land383.csv	0	2039258562	true	500	0.5	0	5.0	1.0	0.01	1.0	false	0.0	0.18814260240039163	1.0878348798140857E-5	2512.4387396227157	325.23614877791954	2.513031168417084	0.0	0.0	0.0015777887738685323
141	0.05	1.0	1.0	6.0	1.0	4.0	2.0	0.1	true	0.9	0.0	true	1.0	1.0	0.0010	1.0E-4	2.0	5.0	1.0	ContinuousCorrelated	SingleState	true	0.0	1.0	PoissonProcess	1000	0	1	land442.csv	0	2039261665	true	500	0.5	0	5.0	1.0	0.01	1.0	false	0.0	0.1291487951815676	4.861707404770748E-5	2457.1519066551436	74.43818840319983	2.457725054168286	0.0	0.0	-0.0025963917374017403
142	0.05	1.0	1.0	6.0	1.0	4.0	2.0	0.1	true	0.9	0.0	true	1.0	1.0	0.0010	1.0E-4	2.0	5.0	1.0	ContinuousCorrelated	SingleState	true	0.0	1.0	PoissonProcess	1000	0	1	land444.csv	0	2039264490	true	500	0.5	0	5.0	1.0	0.01	1.0	false	0.0	0.221240624840799	5.060182334170307E-5	2464.4862558873488	218.63938478296777	2.4650861592268525	0.0	0.0	-0.002936676228092981
143	0.05	1.0	1.0	6.0	1.0	4.0	2.0	0.1	true	0.9	0.0	true	1.0	1.0	0.0010	1.0E-4	2.0	5.0	1.0	ContinuousCorrelated	SingleState	true	0.0	1.0	PoissonProcess	1000	0	1	land447.csv	0	2039267419	true	500	0.5	0	5.0	1.0	0.01	1.0	false	0.0	0.1751698509758918	1.4797245761281776E-5	2345.304201143555	123.04659632235185	2.345893174895088	0.0	0.0	-5.904171707053156E-4
144	0.05	1.0	1.0	6.0	1.0	4.0	2.0	0.1	true	0.9	0.0	true	1.0	1.0	0.0010	1.0E-4	2.0	5.0	1.0	ContinuousCorrelated	SingleState	true	0.0	1.0	PoissonProcess	1000	0	1	land498.csv	0	2039270548	true	500	0.5	0	5.0	1.0	0.01	1.0	false	0.0	0.1618616766979034	4.7048286012259965E-5	2389.8526816644667	563.357998139373	2.3904296636414326	0.0	0.0	-0.0014777668022827632
145	0.05	1.0	1.0	6.0	1.0	4.0	2.0	0.1	true	0.9	0.0	true	1.0	1.0	0.0010	1.0E-4	2.0	5.0	1.0	ContinuousCorrelated	SingleState	true	0.0	1.0	PoissonProcess	1000	0	1	land500.csv	0	2039273417	true	500	0.5	0	5.0	1.0	0.01	1.0	false	0.0	0.18139784953569055	2.3793631775064014E-5	2342.753114404009	124.39810679529242	2.3433340847544564	0.0	0.0	-0.0022534839421214812
146	0.05	1.0	1.0	6.0	1.0	4.0	2.0	0.1	true	0.9	0.0	true	1.0	1.0	0.0010	1.0E-4	2.0	5.0	1.0	ContinuousCorrelated	SingleState	true	0.0	1.0	PoissonProcess	1000	0	1	land503.csv	0	2039276496	true	500	0.5	0	5.0	1.0	0.01	1.0	false	0.0	0.18423326173149632	1.0088192175134954E-5	2524.934685522595	175.18406448362606	2.525517056236111	0.0	0.0	-4.6794914403224365E-4
147	0.05	1.0	1.0	6.0	1.0	4.0	2.0	0.1	true	0.9	0.0	true	1.0	1.0	0.0010	1.0E-4	2.0	5.0	1.0	ContinuousCorrelated	SingleState	true	0.0	1.0	PoissonProcess	1000	0	1	land562.csv	0	2039279619	true	500	0.5	0	5.0	1.0	0.01	1.0	false	0.0	0.23356978212729526	1.0505031002262841E-4	2408.2948051000694	165.5130194639807	2.408893817609729	0.0	0.0	0.003772864057622032
148	0.05	1.0	1.0	6.0	1.0	4.0	2.0	0.1	true	0.9	0.0	true	1.0	1.0	0.0010	1.0E-4	2.0	5.0	1.0	ContinuousCorrelated	SingleState	true	0.0	1.0	PoissonProcess	1000	0	1	land564.csv	0	2039282477	true	500	0.5	0	5.0	1.0	0.01	1.0	false	0.0	0.1933735318168784	2.4818318888933504E-5	2521.651601596541	107.91998301799569	2.5222253245839434	0.0	0.0	-6.446541373083004E-4
149	0.05	1.0	1.0	6.0	1.0	4.0	2.0	0.1	true	0.9	0.0	true	1.0	1.0	0.0010	1.0E-4	2.0	5.0	1.0	ContinuousCorrelated	SingleState	true	0.0	1.0	PoissonProcess	1000	0	1	land567.csv	0	2039285647	true	500	0.5	0	5.0	1.0	0.01	1.0	false	0.0	0.18206238824133608	1.5672356410123814E-5	2540.6442218248476	99.81289655531351	2.541243571537155	0.0	0.0	-8.636284768422806E-4
150	0.05	1.0	1.0	6.0	1.0	4.0	2.0	0.1	true	0.9	0.0	true	1.0	1.0	0.0010	1.0E-4	2.0	5.0	1.0	ContinuousCorrelated	SingleState	true	0.0	1.0	PoissonProcess	1000	0	1	land618.csv	0	2039288727	true	500	0.5	0	5.0	1.0	0.01	1.0	false	0.0	0.18615755437858128	6.185450754607194E-5	2406.619314837774	327.07585733264267	2.407189392013157	0.0	0.0	-0.006637182287371335
151	0.05	1.0	1.0	6.0	1.0	4.0	2.0	0.1	true	0.9	0.0	true	1.0	1.0	0.0010	1.0E-4	2.0	5.0	1.0	ContinuousCorrelated	SingleState	true	0.0	1.0	PoissonProcess	1000	0	1	land620.csv	0	2039291602	true	500	0.5	0	5.0	1.0	0.01	1.0	false	0.0	0.18108966520425407	2.898340010139117E-5	2686.478337118212	6328.204113183215	2.6870726348849137	0.0	0.0	4.442501586285031E-4
152	0.05	1.0	1.0	6.0	1.0	4.0	2.0	0.1	true	0.9	0.0	true	1.0	1.0	0.0010	1.0E-4	2.0	5.0	1.0	ContinuousCorrelated	SingleState	true	0.0	1.0	PoissonProcess	1000	0	1	land623.csv	0	2039294665	true	500	0.5	0	5.0	1.0	0.01	1.0	false	0.0	0.18520550862991125	1.1378292524191205E-5	2464.9299772898503	96.50886311868959	2.4655019816641177	0.0	0.0	0.0032518277635420275
153	0.05	1.0	1.0	6.0	1.0	4.0	2.0	0.1	true	0.9	0.0	true	1.0	1.0	0.0010	1.0E-4	2.0	5.0	1.0	ContinuousCorrelated	SingleState	true	0.0	1.0	PoissonProcess	1000	0	1	land682.csv	0	2039297881	true	500	0.5	0	5.0	1.0	0.01	1.0	false	0.0	0.17853466347956606	5.967857391051184E-5	2503.172264809649	111.9308488573617	2.50375898662723	0.0	0.0	-0.001493648837573943
154	0.05	1.0	1.0	6.0	1.0	4.0	2.0	0.1	true	0.9	0.0	true	1.0	1.0	0.0010	1.0E-4	2.0	5.0	1.0	ContinuousCorrelated	SingleState	true	0.0	1.0	PoissonProcess	1000	0	1	land684.csv	0	2039300780	true	500	0.5	0	5.0	1.0	0.01	1.0	false	0.0	0.1509218223330513	4.536711867943793E-5	2542.4457331806925	194.07147236820262	2.5430177691132783	0.0	0.0	-2.8237652463580353E-4
155	0.05	1.0	1.0	6.0	1.0	4.0	2.0	0.1	true	0.9	0.0	true	1.0	1.0	0.0010	1.0E-4	2.0	5.0	1.0	ContinuousCorrelated	SingleState	true	0.0	1.0	PoissonProcess	1000	0	1	land687.csv	0	2039303697	true	500	0.5	0	5.0	1.0	0.01	1.0	false	0.0	0.1890600541246753	1.0845166278730782E-5	2473.120725226383	436.109020665274	2.4736957844841445	0.0	0.0	-0.00259529773627563
156	0.05	1.0	1.0	6.0	1.0	4.0	2.0	0.1	true	0.9	0.0	true	1.0	1.0	0.0010	1.0E-4	2.0	5.0	1.0	ContinuousCorrelated	SingleState	true	0.0	1.0	PoissonProcess	1000	0	1	land738.csv	0	2039306810	true	500	0.5	0	5.0	1.0	0.01	1.0	false	0.0	0.1739252795999143	6.612321613997503E-5	2423.2022352448735	167.94375439644202	2.4237821916684186	0.0	0.0	0.002574474930118743
157	0.05	1.0	1.0	6.0	1.0	4.0	2.0	0.1	true	0.9	0.0	true	1.0	1.0	0.0010	1.0E-4	2.0	5.0	1.0	ContinuousCorrelated	SingleState	true	0.0	1.0	PoissonProcess	1000	0	1	land740.csv	0	2039309739	true	500	0.5	0	5.0	1.0	0.01	1.0	false	0.0	0.17969718019372324	2.4525779901788505E-5	2343.2302007961234	100.21646179211851	2.343824347780526	0.0	0.0	-0.002794774957251621
158	0.05	1.0	1.0	6.0	1.0	4.0	2.0	0.1	true	0.9	0.0	true	1.0	1.0	0.0010	1.0E-4	2.0	5.0	1.0	ContinuousCorrelated	SingleState	true	0.0	1.0	PoissonProcess	1000	0	1	land743.csv	0	2039312758	true	500	0.5	0	5.0	1.0	0.01	1.0	false	0.0	0.19575169719748844	1.1646112462243604E-5	2526.0214545150016	107.21964519260203	2.5265924319370416	0.0	0.0	3.0916310942336907E-4
159	0.05	1.0	1.0	6.0	1.0	4.0	2.0	0.1	true	0.9	0.0	true	1.0	1.0	0.0010	1.0E-4	2.0	5.0	1.0	ContinuousCorrelated	SingleState	true	0.0	1.0	PoissonProcess	1000	0	1	land802.csv	0	2039315947	true	500	0.5	0	5.0	1.0	0.01	1.0	false	0.0	0.18855150624741004	7.496044745036416E-5	2465.2330589321377	107.99246688458625	2.4658323413907643	0.0	0.0	0.002275256148653935
160	0.05	1.0	1.0	6.0	1.0	4.0	2.0	0.1	true	0.9	0.0	true	1.0	1.0	0.0010	1.0E-4	2.0	5.0	1.0	ContinuousCorrelated	SingleState	true	0.0	1.0	PoissonProcess	1000	0	1	land804.csv	0	2039318762	true	500	0.5	0	5.0	1.0	0.01	1.0	false	0.0	0.20159693723485622	5.0471414384655135E-5	2410.4493797377	165.45208530992838	2.4110487428447436	0.0	0.0	-0.0037379274104422373
161	0.05	1.0	1.0	6.0	1.0	4.0	2.0	0.1	true	0.9	0.0	true	1.0	1.0	0.0010	1.0E-4	2.0	5.0	1.0	ContinuousCorrelated	SingleState	true	0.0	1.0	PoissonProcess	1000	0	1	land807.csv	0	2039321594	true	500	0.5	0	5.0	1.0	0.01	1.0	false	0.0	0.17389340986728005	1.6202568975618114E-5	2456.98869814256	191.0800894414925	2.457558711736049	0.0	0.0	0.004241750634247996
162	0.05	1.0	1.0	6.0	1.0	4.0	2.0	0.1	true	0.9	0.0	true	1.0	1.0	0.0010	1.0E-4	2.0	5.0	1.0	ContinuousCorrelated	SingleState	true	0.0	1.0	PoissonProcess	1000	0	1	land858.csv	0	2039324702	true	500	0.5	0	5.0	1.0	0.01	1.0	false	0.0	0.15164398024207593	5.488331768835234E-5	2507.650033335306	165.2618105974319	2.5082363059969017	0.0	0.0	-6.591180749190447E-4
163	0.05	1.0	1.0	6.0	1.0	4.0	2.0	0.1	true	0.9	0.0	true	1.0	1.0	0.0010	1.0E-4	2.0	5.0	1.0	ContinuousCorrelated	SingleState	true	0.0	1.0	PoissonProcess	1000	0	1	land860.csv	0	2039327536	true	500	0.5	0	5.0	1.0	0.01	1.0	false	0.0	0.17095836944623308	2.4577786045122514E-5	2482.248566419976	513.8220225933414	2.4828444961350957	0.0	0.0	-0.003237015479951914
164	0.05	1.0	1.0	6.0	1.0	4.0	2.0	0.1	true	0.9	0.0	true	1.0	1.0	0.0010	1.0E-4	2.0	5.0	1.0	ContinuousCorrelated	SingleState	true	0.0	1.0	PoissonProcess	1000	0	1	land863.csv	0	2039330695	true	500	0.5	0	5.0	1.0	0.01	1.0	false	0.0	0.1692595516122214	1.0908867457890361E-5	2516.6949625557236	98.37683916818885	2.51727476803451	0.0	0.0	-3.197847179897571E-4
165	0.05	1.0	1.0	6.0	1.0	4.0	2.0	0.1	true	0.9	0.0	true	1.0	1.0	0.0010	1.0E-4	2.0	5.0	1.0	ContinuousCorrelated	SingleState	true	0.0	1.0	PoissonProcess	1000	0	1	land922.csv	0	2039333882	true	500	0.5	0	5.0	1.0	0.01	1.0	false	0.0	0.29713576561749677	8.684962946763657E-5	2695.836784721556	158.87818521856127	2.6964078649714667	0.0	0.0	0.0011108354908088832
166	0.05	1.0	1.0	6.0	1.0	4.0	2.0	0.1	true	0.9	0.0	true	1.0	1.0	0.0010	1.0E-4	2.0	5.0	1.0	ContinuousCorrelated	SingleState	true	0.0	1.0	PoissonProcess	1000	0	1	land924.csv	0	2039336762	true	500	0.5	0	5.0	1.0	0.01	1.0	false	0.0	0.17938303727890786	2.2955045731216814E-5	2409.5141458064563	98.87844899629765	2.410110652899037	0.0	0.0	4.487042163819994E-4
167	0.05	1.0	1.0	6.0	1.0	4.0	2.0	0.1	true	0.9	0.0	true	1.0	1.0	0.0010	1.0E-4	2.0	5.0	1.0	ContinuousCorrelated	SingleState	true	0.0	1.0	PoissonProcess	1000	0	1	land927.csv	0	2039339886	true	500	0.5	0	5.0	1.0	0.01	1.0	false	0.0	0.19361576058360394	1.631863879254334E-5	2360.554190025253	142.71250318326318	2.361133595876224	0.0	0.0	0.0028565516569551987
168	0.05	1.0	1.0	6.0	1.0	4.0	2.0	0.1	true	0.9	0.0	true	1.0	1.0	0.0010	1.0E-4	2.0	5.0	1.0	ContinuousCorrelated	SingleState	true	0.0	1.0	PoissonProcess	1000	0	1	land978.csv	0	2039342999	true	500	0.5	0	5.0	1.0	0.01	1.0	false	0.0	0.19535550528566362	4.9362532543359636E-5	2448.043760861665	359.7041829930819	2.448615241314854	0.0	0.0	-0.003799481783836935
169	0.05	1.0	1.0	6.0	1.0	4.0	2.0	0.1	true	0.9	0.0	true	1.0	1.0	0.0010	1.0E-4	2.0	5.0	1.0	ContinuousCorrelated	SingleState	true	0.0	1.0	PoissonProcess	1000	0	1	land980.csv	0	2039345914	true	500	0.5	0	5.0	1.0	0.01	1.0	false	0.0	0.19079879834504185	2.5095164096491952E-5	2533.1335552375035	118.14289609380556	2.533732645617804	0.0	0.0	-0.00100120654314776
170	0.05	1.0	1.0	6.0	1.0	4.0	2.0	0.1	true	0.9	0.0	true	1.0	1.0	0.0010	1.0E-4	2.0	5.0	1.0	ContinuousCorrelated	SingleState	true	0.0	1.0	PoissonProcess	1000	0	1	land983.csv	0	2039349061	true	500	0.5	0	5.0	1.0	0.01	1.0	false	0.0	0.18732985980638328	1.1816844851835799E-5	2401.027629765065	212.17532213906253	2.401619429055453	0.0	0.0	0.004407431372650844
171	0.05	1.0	1.0	6.0	1.0	4.0	2.0	0.1	true	0.9	0.0	true	1.0	1.0	0.0010	1.0E-4	2.0	5.0	1.0	ContinuousCorrelated	SingleState	true	0.0	1.0	PoissonProcess	1000	0	1	land1042.csv	0	2039352312	true	500	0.5	0	5.0	1.0	0.01	1.0	false	0.0	0.21275905660481179	6.695981162204927E-5	2509.0531087984577	89.79351488124296	2.509624019299025	0.0	0.0	-9.80112314345786E-4
172	0.05	1.0	1.0	6.0	1.0	4.0	2.0	0.1	true	0.9	0.0	true	1.0	1.0	0.0010	1.0E-4	2.0	5.0	1.0	ContinuousCorrelated	SingleState	true	0.0	1.0	PoissonProcess	1000	0	1	land1044.csv	0	2039355227	true	500	0.5	0	5.0	1.0	0.01	1.0	false	0.0	0.2644324967517074	4.415623389917283E-5	2469.4508509530274	134.0067793720364	2.4700486662430943	0.0	0.0	0.0011357854573668224
173	0.05	1.0	1.0	6.0	1.0	4.0	2.0	0.1	true	0.9	0.0	true	1.0	1.0	0.0010	1.0E-4	2.0	5.0	1.0	ContinuousCorrelated	SingleState	true	0.0	1.0	PoissonProcess	1000	0	1	land1047.csv	0	2039358210	true	500	0.5	0	5.0	1.0	0.01	1.0	false	0.0	0.1753725083888956	1.2445472605664597E-5	2516.377797803541	124.84196469144177	2.5169706135109826	0.0	0.0	-8.376574107750196E-4
174	0.05	1.0	1.0	6.0	1.0	4.0	2.0	0.1	true	0.9	0.0	true	1.0	1.0	0.0010	1.0E-4	2.0	5.0	1.0	ContinuousCorrelated	SingleState	true	0.0	1.0	PoissonProcess	1000	0	1	land1098.csv	0	2039361387	true	500	0.5	0	5.0	1.0	0.01	1.0	false	0.0	0.16181033888537677	4.9770065085847796E-5	2514.9174205255404	82.62438585192739	2.515494238926733	0.0	0.0	-2.1828749903945094E-4
175	0.05	1.0	1.0	6.0	1.0	4.0	2.0	0.1	true	0.9	0.0	true	1.0	1.0	0.0010	1.0E-4	2.0	5.0	1.0	ContinuousCorrelated	SingleState	true	0.0	1.0	PoissonProcess	1000	0	1	land1100.csv	0	2039364235	true	500	0.5	0	5.0	1.0	0.01	1.0	false	0.0	0.17365035175180954	3.189241609566445E-5	2409.7901722857146	104.39473560706152	2.410361642043096	0.0	0.0	0.0018784339838227634
176	0.05	1.0	1.0	6.0	1.0	4.0	2.0	0.1	true	0.9	0.0	true	1.0	1.0	0.0010	1.0E-4	2.0	5.0	1.0	ContinuousCorrelated	SingleState	true	0.0	1.0	PoissonProcess	1000	0	1	land1103.csv	0	2039367272	true	500	0.5	0	5.0	1.0	0.01	1.0	false	0.0	0.17516791138523352	1.1022206352326467E-5	2497.9000243189275	108.8164000138306	2.498470030573614	0.0	0.0	0.004206432123005196
177	0.05	1.0	1.0	6.0	1.0	4.0	2.0	0.1	true	0.9	0.0	true	1.0	1.0	0.0010	1.0E-4	2.0	5.0	1.0	ContinuousCorrelated	SingleState	true	0.0	1.0	PoissonProcess	1000	0	1	land1162.csv	0	2039370410	true	500	0.5	0	5.0	1.0	0.01	1.0	false	0.0	0.13476461007326745	5.42976366059096E-5	2438.843608531636	149.59702196154615	2.439428166341072	0.0	0.0	-0.0024186772072165566
178	0.05	1.0	1.0	6.0	1.0	4.0	2.0	0.1	true	0.9	0.0	true	1.0	1.0	0.0010	1.0E-4	2.0	5.0	1.0	ContinuousCorrelated	SingleState	true	0.0	1.0	PoissonProcess	1000	0	1	land1164.csv	0	2039373247	true	500	0.5	0	5.0	1.0	0.01	1.0	false	0.0	0.17423236703334194	5.237217709960327E-5	2572.6940160370004	520.0833949500109	2.5732722450512204	0.0	0.0	-4.8215856844782603E-4
179	0.05	1.0	1.0	6.0	1.0	4.0	2.0	0.1	true	0.9	0.0	true	1.0	1.0	0.0010	1.0E-4	2.0	5.0	1.0	ContinuousCorrelated	SingleState	true	0.0	1.0	PoissonProcess	1000	0	1	land1167.csv	0	2039376195	true	500	0.5	0	5.0	1.0	0.01	1.0	false	0.0	0.19372274211229693	1.3821054508364504E-5	2652.307785960154	135.56036717562128	2.6529053458270955	0.0	0.0	-2.3133667405671792E-4
180	0.05	1.0	1.0	6.0	1.0	4.0	2.0	0.1	true	0.9	0.0	true	1.0	1.0	0.0010	1.0E-4	2.0	5.0	1.0	ContinuousCorrelated	SingleState	true	0.0	1.0	PoissonProcess	1000	0	1	land1218.csv	0	2039379297	true	500	0.5	0	5.0	1.0	0.01	1.0	false	0.0	0.3058457785088641	7.692729896968807E-5	2375.002787740313	140.26611679834454	2.375574582750235	0.0	0.0	0.002832020017697992
181	0.05	1.0	1.0	6.0	1.0	4.0	2.0	0.1	true	0.9	0.0	true	1.0	1.0	0.0010	1.0E-4	2.0	5.0	1.0	ContinuousCorrelated	SingleState	true	0.0	1.0	PoissonProcess	1000	0	1	land1220.csv	0	2039382206	true	500	0.5	0	5.0	1.0	0.01	1.0	false	0.0	0.1886087618762081	2.5469175418943077E-5	2452.6902365346623	101.26330879263158	2.4532822564051493	0.0	0.0	0.0017445199637442037
182	0.05	1.0	1.0	6.0	1.0	4.0	2.0	0.1	true	0.9	0.0	true	1.0	1.0	0.0010	1.0E-4	2.0	5.0	1.0	ContinuousCorrelated	SingleState	true	0.0	1.0	PoissonProcess	1000	0	1	land1223.csv	0	2039385356	true	500	0.5	0	5.0	1.0	0.01	1.0	false	0.0	0.19526363098492824	1.1877726076875629E-5	2437.1441498666845	131.1419098247054	2.437715835901718	0.0	0.0	0.002015011268801943
183	0.05	1.0	1.0	6.0	1.0	4.0	2.0	0.1	true	0.9	0.0	true	1.0	1.0	0.0010	1.0E-4	2.0	5.0	1.0	ContinuousCorrelated	SingleState	true	0.0	1.0	PoissonProcess	1000	0	1	land1282.csv	0	2039388539	true	500	0.5	0	5.0	1.0	0.01	1.0	false	0.0	0.17225550554775396	3.8845618167798984E-5	2364.0552818354577	150.3281527549829	2.3646439549090963	0.0	0.0	-0.0010792960994432906
184	0.05	1.0	1.0	6.0	1.0	4.0	2.0	0.1	true	0.9	0.0	true	1.0	1.0	0.0010	1.0E-4	2.0	5.0	1.0	ContinuousCorrelated	SingleState	true	0.0	1.0	PoissonProcess	1000	0	1	land1284.csv	0	2039391513	true	500	0.5	0	5.0	1.0	0.01	1.0	false	0.0	0.15178409222099112	1.8057216886899394E-5	2388.8634179869514	87.19061574748213	2.389463262350123	0.0	0.0	0.0010882337301341895
185	0.05	1.0	1.0	6.0	1.0	4.0	2.0	0.1	true	0.9	0.0	true	1.0	1.0	0.0010	1.0E-4	2.0	5.0	1.0	ContinuousCorrelated	SingleState	true	0.0	1.0	PoissonProcess	1000	0	1	land1287.csv	0	2039394623	true	500	0.5	0	5.0	1.0	0.01	1.0	false	0.0	0.19636680370562862	1.682797241922016E-5	2570.930347480511	100.62012722866132	2.571521259732027	0.0	0.0	0.0011658796212934476
186	0.05	1.0	1.0	6.0	1.0	4.0	2.0	0.1	true	0.9	0.0	true	1.0	1.0	0.0010	1.0E-4	2.0	5.0	1.0	ContinuousCorrelated	SingleState	true	0.0	1.0	PoissonProcess	1000	0	1	land1338.csv	0	2039397831	true	500	0.5	0	5.0	1.0	0.01	1.0	false	0.0	0.20809158329674599	6.32253513889872E-5	2372.680631508274	218.46493291432392	2.3732558892903586	0.0	0.0	7.148722656116221E-4
187	0.05	1.0	1.0	6.0	1.0	4.0	2.0	0.1	true	0.9	0.0	true	1.0	1.0	0.0010	1.0E-4	2.0	5.0	1.0	ContinuousCorrelated	SingleState	true	0.0	1.0	PoissonProcess	1000	0	1	land1340.csv	0	2039400627	true	500	0.5	0	5.0	1.0	0.01	1.0	false	0.0	0.17044635583301812	2.4214571196634658E-5	2525.9279152010704	106.64994608057252	2.5265272452469576	0.0	0.0	-0.0037564775229562784
188	0.05	1.0	1.0	6.0	1.0	4.0	2.0	0.1	true	0.9	0.0	true	1.0	1.0	0.0010	1.0E-4	2.0	5.0	1.0	ContinuousCorrelated	SingleState	true	0.0	1.0	PoissonProcess	1000	0	1	land1343.csv	0	2039403739	true	500	0.5	0	5.0	1.0	0.01	1.0	false	0.0	0.17530479925856363	1.1374918765731531E-5	2509.2469848858227	124.95137862548647	2.5098407401291993	0.0	0.0	0.003774775543345269
189	0.05	1.0	1.0	6.0	1.0	4.0	2.0	0.1	true	0.9	0.0	true	1.0	1.0	0.0010	1.0E-4	2.0	5.0	1.0	ContinuousCorrelated	SingleState	true	0.0	1.0	PoissonProcess	1000	0	1	land1402.csv	0	2039406917	true	500	0.5	0	5.0	1.0	0.01	1.0	false	0.0	0.20259221694003265	9.442219674136869E-5	2420.0328428626813	90.32210455343763	2.420632842322308	0.0	0.0	7.415067053463221E-4
190	0.05	1.0	1.0	6.0	1.0	4.0	2.0	0.1	true	0.9	0.0	true	1.0	1.0	0.0010	1.0E-4	2.0	5.0	1.0	ContinuousCorrelated	SingleState	true	0.0	1.0	PoissonProcess	1000	0	1	land1404.csv	0	2039409691	true	500	0.5	0	5.0	1.0	0.01	1.0	false	0.0	0.18505717073652164	3.6096338005119195E-5	2491.8331584560738	146.08716355493635	2.4924145816349803	0.0	0.0	-0.003325391506858829
191	0.05	1.0	1.0	6.0	1.0	4.0	2.0	0.1	true	0.9	0.0	true	1.0	1.0	0.0010	1.0E-4	2.0	5.0	1.0	ContinuousCorrelated	SingleState	true	0.0	1.0	PoissonProcess	1000	0	1	land1407.csv	0	2039412668	true	500	0.5	0	5.0	1.0	0.01	1.0	false	0.0	0.19763012364333696	1.4842366745151102E-5	2473.3604256569834	158.46146864780056	2.473930528239814	0.0	0.0	5.076335807627181E-4
192	0.05	1.0	1.0	6.0	1.0	4.0	2.0	0.1	true	0.9	0.0	true	1.0	1.0	0.0010	1.0E-4	2.0	5.0	1.0	ContinuousCorrelated	SingleState	true	0.0	1.0	PoissonProcess	1000	0	1	land1458.csv	0	2039415905	true	500	0.5	0	5.0	1.0	0.01	1.0	false	0.0	0.17000570219195457	4.78196245565236E-5	2405.3839687128366	92.16533788248034	2.4059656665183673	0.0	0.0	-0.003378621251117292
193	0.05	1.0	1.0	6.0	1.0	4.0	2.0	0.1	true	0.9	0.0	true	1.0	1.0	0.0010	1.0E-4	2.0	5.0	1.0	ContinuousCorrelated	SingleState	true	0.0	1.0	PoissonProcess	1000	0	1	land1460.csv	0	2039418715	true	500	0.5	0	5.0	1.0	0.01	1.0	false	0.0	0.15921791567019397	2.3503021454482622E-5	2516.3787744885312	136.171578031538	2.516970273768229	0.0	0.0	-0.00577668105337573
194	0.05	1.0	1.0	6.0	1.0	4.0	2.0	0.1	true	0.9	0.0	true	1.0	1.0	0.0010	1.0E-4	2.0	5.0	1.0	ContinuousCorrelated	SingleState	true	0.0	1.0	PoissonProcess	1000	0	1	land1463.csv	0	2039421838	true	500	0.5	0	5.0	1.0	0.01	1.0	false	0.0	0.18119007714414898	1.1092529502769884E-5	2450.322114050774	87.64801733414932	2.4509089306733474	0.0	0.0	0.0017321392473897584
195	0.05	1.0	1.0	6.0	1.0	4.0	2.0	0.1	true	0.9	0.0	true	1.0	1.0	0.0010	1.0E-4	2.0	5.0	1.0	ContinuousCorrelated	SingleState	true	0.0	1.0	PoissonProcess	1000	0	1	land1522.csv	0	2039424989	true	500	0.5	0	5.0	1.0	0.01	1.0	false	0.0	0.19296477248833127	5.58411441678873E-5	2450.5447011398014	107.24128052421383	2.451127218862853	0.0	0.0	-0.002729391031740846
196	0.05	1.0	1.0	6.0	1.0	4.0	2.0	0.1	true	0.9	0.0	true	1.0	1.0	0.0010	1.0E-4	2.0	5.0	1.0	ContinuousCorrelated	SingleState	true	0.0	1.0	PoissonProcess	1000	0	1	land1524.csv	0	2039427948	true	500	0.5	0	5.0	1.0	0.01	1.0	false	0.0	0.20490342995116984	2.221375799672575E-5	2416.905346566682	107.19865360467969	2.41749591017571	0.0	0.0	0.004193713850732416
197	0.05	1.0	1.0	6.0	1.0	4.0	2.0	0.1	true	0.9	0.0	true	1.0	1.0	0.0010	1.0E-4	2.0	5.0	1.0	ContinuousCorrelated	SingleState	true	0.0	1.0	PoissonProcess	1000	0	1	land1527.csv	0	2039431025	true	500	0.5	0	5.0	1.0	0.01	1.0	false	0.0	0.17891963705453065	1.556101265041253E-5	2465.9969481311164	121.63754194804092	2.466585113721421	0.0	0.0	0.0012555667980195717
198	0.05	1.0	1.0	6.0	1.0	4.0	2.0	0.1	true	0.9	0.0	true	1.0	1.0	0.0010	1.0E-4	2.0	5.0	1.0	ContinuousCorrelated	SingleState	true	0.0	1.0	PoissonProcess	1000	0	1	land1578.csv	0	2039434195	true	500	0.5	0	5.0	1.0	0.01	1.0	false	0.0	0.15159668563228415	4.774117123106344E-5	2363.795124291558	160.814313760444	2.3643670133767447	0.0	0.0	0.0028174656233637464
199	0.05	1.0	1.0	6.0	1.0	4.0	2.0	0.1	true	0.9	0.0	true	1.0	1.0	0.0010	1.0E-4	2.0	5.0	1.0	ContinuousCorrelated	SingleState	true	0.0	1.0	PoissonProcess	1000	0	1	land1580.csv	0	2039437123	true	500	0.5	0	5.0	1.0	0.01	1.0	false	0.0	0.21749747479485584	3.141369099817431E-5	2482.4709056176266	109.18118635129652	2.483042941718354	0.0	0.0	4.591931233292983E-4
200	0.05	1.0	1.0	6.0	1.0	4.0	2.0	0.1	true	0.9	0.0	true	1.0	1.0	0.0010	1.0E-4	2.0	5.0	1.0	ContinuousCorrelated	SingleState	true	0.0	1.0	PoissonProcess	1000	0	1	land1583.csv	0	2039440313	true	500	0.5	0	5.0	1.0	0.01	1.0	false	0.0	0.18731266754863207	1.1289642898370565E-5	2469.926490199988	110.19051223485859	2.4705176503835817	0.0	0.0	-0.005239612959558682
201	0.05	1.0	1.0	6.0	1.0	4.0	2.0	0.1	true	0.9	0.0	true	1.0	1.0	0.0010	1.0E-4	2.0	5.0	1.0	ContinuousCorrelated	SingleState	true	0.0	1.0	PoissonProcess	1000	0	1	land1642.csv	0	2039443439	true	500	0.5	0	5.0	1.0	0.01	1.0	false	0.0	0.12659461499530425	7.177505608326724E-5	2435.9976421433494	141.59017364939314	2.4365793455115026	0.0	0.0	-0.0011901097949738473
202	0.05	1.0	1.0	6.0	1.0	4.0	2.0	0.1	true	0.9	0.0	true	1.0	1.0	0.0010	1.0E-4	2.0	5.0	1.0	ContinuousCorrelated	SingleState	true	0.0	1.0	PoissonProcess	1000	0	1	land1644.csv	0	2039446256	true	500	0.5	0	5.0	1.0	0.01	1.0	false	0.0	0.16202198548075378	3.681663357830646E-5	2445.9267173265707	81.93398567895821	2.4465183256565215	0.0	0.0	0.002834586982354821
203	0.05	1.0	1.0	6.0	1.0	4.0	2.0	0.1	true	0.9	0.0	true	1.0	1.0	0.0010	1.0E-4	2.0	5.0	1.0	ContinuousCorrelated	SingleState	true	0.0	1.0	PoissonProcess	1000	0	1	land1647.csv	0	2039449205	true	500	0.5	0	5.0	1.0	0.01	1.0	false	0.0	0.1916122175479109	8.595313201132313E-6	2543.9196608780962	135.2372375932501	2.544519660625506	0.0	0.0	0.0010889363381875199
204	0.05	1.0	1.0	6.0	1.0	4.0	2.0	0.1	true	0.9	0.0	true	1.0	1.0	0.0010	1.0E-4	2.0	5.0	1.0	ContinuousCorrelated	SingleState	true	0.0	1.0	PoissonProcess	1000	0	1	land1698.csv	0	2039452273	true	500	0.5	0	5.0	1.0	0.01	1.0	false	0.0	0.21391575753790237	6.482330162186998E-5	2423.3695972336436	113.0441869537567	2.423943190642624	0.0	0.0	-0.0010206532290773045
205	0.05	1.0	1.0	6.0	1.0	4.0	2.0	0.1	true	0.9	0.0	true	1.0	1.0	0.0010	1.0E-4	2.0	5.0	1.0	ContinuousCorrelated	SingleState	true	0.0	1.0	PoissonProcess	1000	0	1	land1700.csv	0	2039455119	true	500	0.5	0	5.0	1.0	0.01	1.0	false	0.0	0.18633182236261464	3.0064880054896364E-5	2508.5456616974748	308.5943896245989	2.5091454544536793	0.0	0.0	-4.3791763533243127E-4
206	0.05	1.0	1.0	6.0	1.0	4.0	2.0	0.1	true	0.9	0.0	true	1.0	1.0	0.0010	1.0E-4	2.0	5.0	1.0	ContinuousCorrelated	SingleState	true	0.0	1.0	PoissonProcess	1000	0	1	land1703.csv	0	2039458223	true	500	0.5	0	5.0	1.0	0.01	1.0	false	0.0	0.1866136238639563	1.0980179159372293E-5	2557.5993438841997	80.07249355731904	2.5581836043389354	0.0	0.0	-9.95798461538314E-4
207	0.05	1.0	1.0	6.0	1.0	4.0	2.0	0.1	true	0.9	0.0	true	1.0	1.0	0.0010	1.0E-4	2.0	5.0	1.0	ContinuousCorrelated	SingleState	true	0.0	1.0	PoissonProcess	1000	0	1	land1762.csv	0	2039461361	true	500	0.5	0	5.0	1.0	0.01	1.0	false	0.0	0.10287044280787117	4.514792678611561E-5	2488.5153385317863	261.01089109888153	2.489115002094089	0.0	0.0	8.728129394395808E-4
208	0.05	1.0	1.0	6.0	1.0	4.0	2.0	0.1	true	0.9	0.0	true	1.0	1.0	0.0010	1.0E-4	2.0	5.0	1.0	ContinuousCorrelated	SingleState	true	0.0	1.0	PoissonProcess	1000	0	1	land1764.csv	0	2039464234	true	500	0.5	0	5.0	1.0	0.01	1.0	false	0.0	0.1591780707892997	2.698167681509263E-5	2535.451868900479	151.9327048961437	2.5360292614232685	0.0	0.0	0.004107917726970859
209	0.05	1.0	1.0	6.0	1.0	4.0	2.0	0.1	true	0.9	0.0	true	1.0	1.0	0.0010	1.0E-4	2.0	5.0	1.0	ContinuousCorrelated	SingleState	true	0.0	1.0	PoissonProcess	1000	0	1	land1767.csv	0	2039467383	true	500	0.5	0	5.0	1.0	0.01	1.0	false	0.0	0.18260349808797205	1.8811008420766336E-5	2492.1335733655587	104.32344594083932	2.492719185197893	0.0	0.0	0.0011033169399973254
210	0.05	1.0	1.0	6.0	1.0	4.0	2.0	0.1	true	0.9	0.0	true	1.0	1.0	0.0010	1.0E-4	2.0	5.0	1.0	ContinuousCorrelated	SingleState	true	0.0	1.0	PoissonProcess	1000	0	1	land1818.csv	0	2039470501	true	500	0.5	0	5.0	1.0	0.01	1.0	false	0.0	0.22267129090697832	6.544173140881833E-5	2521.1710187017925	142.20928541218365	2.5217486539221103	0.0	0.0	-0.0025942459061830694
211	0.05	1.0	1.0	6.0	1.0	4.0	2.0	0.1	true	0.9	0.0	true	1.0	1.0	0.0010	1.0E-4	2.0	5.0	1.0	ContinuousCorrelated	SingleState	true	0.0	1.0	PoissonProcess	1000	0	1	land1820.csv	0	2039473371	true	500	0.5	0	5.0	1.0	0.01	1.0	false	0.0	0.1753654834324592	2.1715798299495828E-5	2352.9136558221508	169.0401853062337	2.353498623423096	0.0	0.0	9.695219560252769E-4
212	0.05	1.0	1.0	6.0	1.0	4.0	2.0	0.1	true	0.9	0.0	true	1.0	1.0	0.0010	1.0E-4	2.0	5.0	1.0	ContinuousCorrelated	SingleState	true	0.0	1.0	PoissonProcess	1000	0	1	land1823.csv	0	2039476555	true	500	0.5	0	5.0	1.0	0.01	1.0	false	0.0	0.186575280188451	1.0684287620205237E-5	2531.377756198503	126.2630060225003	2.531972032477422	0.0	0.0	-0.0020553742011062788
213	0.05	1.0	1.0	6.0	1.0	4.0	2.0	0.1	true	0.9	0.0	true	1.0	1.0	0.0010	1.0E-4	2.0	5.0	1.0	ContinuousCorrelated	SingleState	true	0.0	1.0	PoissonProcess	1000	0	1	land1882.csv	0	2039479698	true	500	0.5	0	5.0	1.0	0.01	1.0	false	0.0	0.37279602819242214	2.184429978086751E-4	2388.4468238031877	116.11310714592699	2.3890264695947363	0.0	0.0	-0.002168801550509782
214	0.05	1.0	1.0	6.0	1.0	4.0	2.0	0.1	true	0.9	0.0	true	1.0	1.0	0.0010	1.0E-4	2.0	5.0	1.0	ContinuousCorrelated	SingleState	true	0.0	1.0	PoissonProcess	1000	0	1	land1884.csv	0	2039482457	true	500	0.5	0	5.0	1.0	0.01	1.0	false	0.0	0.16582046793534924	3.136428455222419E-5	2494.049341927963	198.0466109150568	2.4946235530800456	0.0	0.0	-0.0013687941999089284
215	0.05	1.0	1.0	6.0	1.0	4.0	2.0	0.1	true	0.9	0.0	true	1.0	1.0	0.0010	1.0E-4	2.0	5.0	1.0	ContinuousCorrelated	SingleState	true	0.0	1.0	PoissonProcess	1000	0	1	land1887.csv	0	2039485494	true	500	0.5	0	5.0	1.0	0.01	1.0	false	0.0	0.1928666405743783	7.927128342840625E-6	2566.8804046006258	153.4452676582019	2.5674553128795923	0.0	0.0	0.0027964888738510924
216	0.05	1.0	1.0	6.0	1.0	4.0	2.0	0.1	true	0.9	0.0	true	1.0	1.0	0.0010	1.0E-4	2.0	5.0	1.0	ContinuousCorrelated	SingleState	true	0.0	1.0	PoissonProcess	1000	0	1	land1938.csv	0	2039488610	true	500	0.5	0	5.0	1.0	0.01	1.0	false	0.0	0.174986846935443	6.184561430484266E-5	2507.7991515143913	128.74562321736795	2.508369758834213	0.0	0.0	8.934766176587467E-4
217	0.05	1.0	1.0	6.0	1.0	4.0	2.0	0.1	true	0.9	0.0	true	1.0	1.0	0.0010	1.0E-4	2.0	5.0	1.0	ContinuousCorrelated	SingleState	true	0.0	1.0	PoissonProcess	1000	0	1	land1940.csv	0	2039491464	true	500	0.5	0	5.0	1.0	0.01	1.0	false	0.0	0.1598674434404965	2.4998699206538805E-5	2428.1031086793814	173.55193930294521	2.4286896962065456	0.0	0.0	-2.1629475275064297E-4
218	0.05	1.0	1.0	6.0	1.0	4.0	2.0	0.1	true	0.9	0.0	true	1.0	1.0	0.0010	1.0E-4	2.0	5.0	1.0	ContinuousCorrelated	SingleState	true	0.0	1.0	PoissonProcess	1000	0	1	land1943.csv	0	2039494562	true	500	0.5	0	5.0	1.0	0.01	1.0	false	0.0	0.19664225338401092	1.305990045318974E-5	2593.548379786452	171.8971076721597	2.5941200226837378	0.0	0.0	-0.0041766744379849894
219	0.05	1.0	1.0	6.0	1.0	4.0	2.0	0.1	true	0.9	0.0	true	1.0	1.0	0.0010	1.0E-4	2.0	5.0	1.0	ContinuousCorrelated	SingleState	true	0.0	1.0	PoissonProcess	1000	0	1	land2002.csv	0	2039497762	true	500	0.5	0	5.0	1.0	0.01	1.0	false	0.0	0.25123525514036255	1.0222729277187347E-4	2367.459240158128	178.83144299774617	2.3680345589435787	0.0	0.0	-4.1774617938806076E-4
220	0.05	1.0	1.0	6.0	1.0	4.0	2.0	0.1	true	0.9	0.0	true	1.0	1.0	0.0010	1.0E-4	2.0	5.0	1.0	ContinuousCorrelated	SingleState	true	0.0	1.0	PoissonProcess	1000	0	1	land2004.csv	0	2039500577	true	500	0.5	0	5.0	1.0	0.01	1.0	false	0.0	0.11474521896206014	5.939039270012178E-5	2432.9793118208236	125.22916240676436	2.4335510096812967	0.0	0.0	5.441584724843275E-4
221	0.05	1.0	1.0	6.0	1.0	4.0	2.0	0.1	true	0.9	0.0	true	1.0	1.0	0.0010	1.0E-4	2.0	5.0	1.0	ContinuousCorrelated	SingleState	true	0.0	1.0	PoissonProcess	1000	0	1	land2007.csv	0	2039503307	true	500	0.5	0	5.0	1.0	0.01	1.0	false	0.0	0.17736563123042146	1.0849883434791073E-5	2643.870315384522	207.4103862476397	2.644467072115949	0.0	0.0	-3.251852673985254E-4
222	0.05	1.0	1.0	6.0	1.0	4.0	2.0	0.1	true	0.9	0.0	true	1.0	1.0	0.0010	1.0E-4	2.0	5.0	1.0	ContinuousCorrelated	SingleState	true	0.0	1.0	PoissonProcess	1000	0	1	land2058.csv	0	2039506439	true	500	0.5	0	5.0	1.0	0.01	1.0	false	0.0	0.1675875274463989	5.2003109410871615E-5	2422.942965684063	82.808763046794	2.4235397704922748	0.0	0.0	8.678144492071723E-4
223	0.05	1.0	1.0	6.0	1.0	4.0	2.0	0.1	true	0.9	0.0	true	1.0	1.0	0.0010	1.0E-4	2.0	5.0	1.0	ContinuousCorrelated	SingleState	true	0.0	1.0	PoissonProcess	1000	0	1	land2060.csv	0	2039509317	true	500	0.5	0	5.0	1.0	0.01	1.0	false	0.0	0.20868600355508357	3.0321741158328913E-5	2590.513684628122	367.39673011088786	2.5910837734702423	0.0	0.0	0.004262645337510772
224	0.05	1.0	1.0	6.0	1.0	4.0	2.0	0.1	true	0.9	0.0	true	1.0	1.0	0.0010	1.0E-4	2.0	5.0	1.0	ContinuousCorrelated	SingleState	true	0.0	1.0	PoissonProcess	1000	0	1	land2063.csv	0	2039512456	true	500	0.5	0	5.0	1.0	0.01	1.0	false	0.0	0.1773309494739519	1.0929122882190976E-5	2445.2675486217113	256.9487923316097	2.4458471127341457	0.0	0.0	0.002836280476572047
225	0.05	1.0	1.0	6.0	1.0	4.0	2.0	0.1	true	0.9	0.0	true	1.0	1.0	0.0010	1.0E-4	2.0	5.0	1.0	ContinuousCorrelated	SingleState	true	0.0	1.0	PoissonProcess	1000	0	1	land2122.csv	0	2039515660	true	500	0.5	0	5.0	1.0	0.01	1.0	false	0.0	0.1764971142867686	1.0040156608930876E-4	2497.470539960239	90.6071041649756	2.4980463579455527	0.0	0.0	0.002075277199437832
226	0.05	1.0	1.0	6.0	1.0	4.0	2.0	0.1	true	0.9	0.0	true	1.0	1.0	0.0010	1.0E-4	2.0	5.0	1.0	ContinuousCorrelated	SingleState	true	0.0	1.0	PoissonProcess	1000	0	1	land2124.csv	0	2039518541	true	500	0.5	0	5.0	1.0	0.01	1.0	false	0.0	0.14770140049785205	4.347359601672309E-5	2396.921660648705	127.05097790266207	2.3975104162571097	0.0	0.0	0.0033339576346601775
227	0.05	1.0	1.0	6.0	1.0	4.0	2.0	0.1	true	0.9	0.0	true	1.0	1.0	0.0010	1.0E-4	2.0	5.0	1.0	ContinuousCorrelated	SingleState	true	0.0	1.0	PoissonProcess	1000	0	1	land2127.csv	0	2039521436	true	500	0.5	0	5.0	1.0	0.01	1.0	false	0.0	0.16725411934507878	1.3444290809343895E-5	2534.2172575091026	244.96053091447072	2.5347915848105895	0.0	0.0	-0.0028460498431537025
228	0.05	1.0	1.0	6.0	1.0	4.0	2.0	0.1	true	0.9	0.0	true	1.0	1.0	0.0010	1.0E-4	2.0	5.0	1.0	ContinuousCorrelated	SingleState	true	0.0	1.0	PoissonProcess	1000	0	1	land2178.csv	0	2039524519	true	500	0.5	0	5.0	1.0	0.01	1.0	false	0.0	0.18020605201378534	4.942250332316076E-5	2529.2163818327635	228.05051030728657	2.529813869763502	0.0	0.0	-5.751554990188658E-4
229	0.05	1.0	1.0	6.0	1.0	4.0	2.0	0.1	true	0.9	0.0	true	1.0	1.0	0.0010	1.0E-4	2.0	5.0	1.0	ContinuousCorrelated	SingleState	true	0.0	1.0	PoissonProcess	1000	0	1	land2180.csv	0	2039527443	true	500	0.5	0	5.0	1.0	0.01	1.0	false	0.0	0.17184030077330092	2.6407433140333072E-5	2484.2451033354614	387.43337228297196	2.484834330130038	0.0	0.0	-0.005058437705376721
230	0.05	1.0	1.0	6.0	1.0	4.0	2.0	0.1	true	0.9	0.0	true	1.0	1.0	0.0010	1.0E-4	2.0	5.0	1.0	ContinuousCorrelated	SingleState	true	0.0	1.0	PoissonProcess	1000	0	1	land2183.csv	0	2039530618	true	500	0.5	0	5.0	1.0	0.01	1.0	false	0.0	0.19071542312668738	1.1613486803111893E-5	2505.5809710387703	83.27314869202723	2.506161092734825	0.0	0.0	1.189939472424975E-4
231	0.05	1.0	1.0	6.0	1.0	4.0	2.0	0.1	true	0.9	0.0	true	1.0	1.0	0.0010	1.0E-4	2.0	5.0	1.0	ContinuousCorrelated	SingleState	true	0.0	1.0	PoissonProcess	1000	0	1	land2242.csv	0	2039533790	true	500	0.5	0	5.0	1.0	0.01	1.0	false	0.0	0.26204938515982634	1.2268048444286295E-4	2357.3961799623294	427.90656783745385	2.3579961573623476	0.0	0.0	-0.005651173600586836
232	0.05	1.0	1.0	6.0	1.0	4.0	2.0	0.1	true	0.9	0.0	true	1.0	1.0	0.0010	1.0E-4	2.0	5.0	1.0	ContinuousCorrelated	SingleState	true	0.0	1.0	PoissonProcess	1000	0	1	land2244.csv	0	2039536603	true	500	0.5	0	5.0	1.0	0.01	1.0	false	0.0	0.17836765600338697	3.3231060361925894E-5	2456.0471674943183	108.50518794292338	2.456633588155718	0.0	0.0	-0.0021014343477400027
233	0.05	1.0	1.0	6.0	1.0	4.0	2.0	0.1	true	0.9	0.0	true	1.0	1.0	0.0010	1.0E-4	2.0	5.0	1.0	ContinuousCorrelated	SingleState	true	0.0	1.0	PoissonProcess	1000	0	1	land2247.csv	0	2039539642	true	500	0.5	0	5.0	1.0	0.01	1.0	false	0.0	0.19787794938101366	1.0733205138962683E-5	2424.13759296958	242.39163302231475	2.4247259281243885	0.0	0.0	-0.0013779669176343014
234	0.05	1.0	1.0	6.0	1.0	4.0	2.0	0.1	true	0.9	0.0	true	1.0	1.0	0.0010	1.0E-4	2.0	5.0	1.0	ContinuousCorrelated	SingleState	true	0.0	1.0	PoissonProcess	1000	0	1	land2298.csv	0	2039542778	true	500	0.5	0	5.0	1.0	0.01	1.0	false	0.0	0.20484548854628906	5.451152377077552E-5	2346.6469879116407	115.33682015171306	2.347224892743851	0.0	0.0	4.957893946590197E-4
235	0.05	1.0	1.0	6.0	1.0	4.0	2.0	0.1	true	0.9	0.0	true	1.0	1.0	0.0010	1.0E-4	2.0	5.0	1.0	ContinuousCorrelated	SingleState	true	0.0	1.0	PoissonProcess	1000	0	1	land2300.csv	0	2039545645	true	500	0.5	0	5.0	1.0	0.01	1.0	false	0.0	0.21879598008079287	3.326660731904367E-5	2299.3525176102926	218.39181006067054	2.2999313192398048	0.0	0.0	-0.002488091718476029
236	0.05	1.0	1.0	6.0	1.0	4.0	2.0	0.1	true	0.9	0.0	true	1.0	1.0	0.0010	1.0E-4	2.0	5.0	1.0	ContinuousCorrelated	SingleState	true	0.0	1.0	PoissonProcess	1000	0	1	land2303.csv	0	2039548757	true	500	0.5	0	5.0	1.0	0.01	1.0	false	0.0	0.18666336719726284	1.0101077933524087E-5	2462.3228491838327	110.91601412799054	2.462901949244661	0.0	0.0	0.006469419986103007
237	0.05	1.0	1.0	6.0	1.0	4.0	2.0	0.1	true	0.9	0.0	true	1.0	1.0	0.0010	1.0E-4	2.0	5.0	1.0	ContinuousCorrelated	SingleState	true	0.0	1.0	PoissonProcess	1000	0	1	land2362.csv	0	2039551972	true	500	0.5	0	5.0	1.0	0.01	1.0	false	0.0	0.17096883570780835	4.698014775878862E-5	2546.700365538722	83.27669540916388	2.5472958088677222	0.0	0.0	0.00203570459785885
238	0.05	1.0	1.0	6.0	1.0	4.0	2.0	0.1	true	0.9	0.0	true	1.0	1.0	0.0010	1.0E-4	2.0	5.0	1.0	ContinuousCorrelated	SingleState	true	0.0	1.0	PoissonProcess	1000	0	1	land2364.csv	0	2039554869	true	500	0.5	0	5.0	1.0	0.01	1.0	false	0.0	0.1846702215948317	5.8970177073054535E-5	2466.575151739322	78.54513735746363	2.4671653901321515	0.0	0.0	-9.311218901142197E-4
239	0.05	1.0	1.0	6.0	1.0	4.0	2.0	0.1	true	0.9	0.0	true	1.0	1.0	0.0010	1.0E-4	2.0	5.0	1.0	ContinuousCorrelated	SingleState	true	0.0	1.0	PoissonProcess	1000	0	1	land2367.csv	0	2039557836	true	500	0.5	0	5.0	1.0	0.01	1.0	false	0.0	0.16886755568383818	1.0547463878632991E-5	2448.4171159940292	99.30396682301946	2.449004319768719	0.0	0.0	0.0011157800343326286
240	0.01	1.0	1.0	6.0	1.0	4.0	2.0	0.1	true	0.9	0.0	true	1.0	1.0	0.0010	1.0E-4	2.0	5.0	1.0	ContinuousCorrelated	Kinesis	true	0.0	1.0	PoissonProcess	1000	0	1	land18.csv	0	2039560910	true	500	0.5	0	5.0	1.0	0.01	1.0	false	0.0	0.3660855966152021	5.68805901073939E-5	1380.360203528051	59.693262314420366	1.3809535119124432	2.1691290105270835	0.4733985918208904	8.256820302108473E-4
241	0.01	1.0	1.0	6.0	1.0	4.0	2.0	0.1	true	0.9	0.0	true	1.0	1.0	0.0010	1.0E-4	2.0	5.0	1.0	ContinuousCorrelated	Kinesis	true	0.0	1.0	PoissonProcess	1000	0	1	land20.csv	0	2039563852	true	500	0.5	0	5.0	1.0	0.01	1.0	false	0.0	0.28024766465592743	2.4846046450854735E-5	1189.6737411160018	48.47082375215176	1.1902439814944283	2.1942661837846638	0.5328029994552926	0.003031654798384727
242	0.01	1.0	1.0	6.0	1.0	4.0	2.0	0.1	true	0.9	0.0	true	1.0	1.0	0.0010	1.0E-4	2.0	5.0	1.0	ContinuousCorrelated	Kinesis	true	0.0	1.0	PoissonProcess	1000	0	1	land23.csv	0	2039566955	true	500	0.5	0	5.0	1.0	0.01	1.0	false	0.0	0.22147272639723045	8.92775239191803E-6	1123.4651260079952	47.10587335776012	1.124038208485092	2.35775809110684	0.5383805912959774	6.708310780540299E-4
243	0.01	1.0	1.0	6.0	1.0	4.0	2.0	0.1	true	0.9	0.0	true	1.0	1.0	0.0010	1.0E-4	2.0	5.0	1.0	ContinuousCorrelated	Kinesis	true	0.0	1.0	PoissonProcess	1000	0	1	land82.csv	0	2039570125	true	500	0.5	0	5.0	1.0	0.01	1.0	false	0.0	0.26768989644649116	8.494992696884634E-5	1913.9023942728465	76.52998486521041	1.914502348477934	2.286756964938199	0.5022190145055057	-0.0032377264834424747
244	0.01	1.0	1.0	6.0	1.0	4.0	2.0	0.1	true	0.9	0.0	true	1.0	1.0	0.0010	1.0E-4	2.0	5.0	1.0	ContinuousCorrelated	Kinesis	true	0.0	1.0	PoissonProcess	1000	0	1	land84.csv	0	2039572894	true	500	0.5	0	5.0	1.0	0.01	1.0	false	0.0	0.24076036632504688	2.514558310672551E-5	1265.3242121314595	56.50784863564595	1.2658946099546937	2.256396814671577	0.49894080914125966	-0.0028912231798863502
245	0.01	1.0	1.0	6.0	1.0	4.0	2.0	0.1	true	0.9	0.0	true	1.0	1.0	0.0010	1.0E-4	2.0	5.0	1.0	ContinuousCorrelated	Kinesis	true	0.0	1.0	PoissonProcess	1000	0	1	land87.csv	0	2039575988	true	500	0.5	0	5.0	1.0	0.01	1.0	false	0.0	0.16285609258284123	9.251949655267249E-6	1422.1748649924107	91.51387544238828	1.4227524966286194	2.195239684862734	0.47209181907171216	0.0028992162702686144
246	0.01	1.0	1.0	6.0	1.0	4.0	2.0	0.1	true	0.9	0.0	true	1.0	1.0	0.0010	1.0E-4	2.0	5.0	1.0	ContinuousCorrelated	Kinesis	true	0.0	1.0	PoissonProcess	1000	0	1	land138.csv	0	2039579175	true	500	0.5	0	5.0	1.0	0.01	1.0	false	0.0	0.33030109491653775	5.988459627068782E-5	1615.8793860236808	95.63954375689619	1.6164775649133944	2.402065707228224	0.5168049865302764	-0.0023598450044631275
247	0.01	1.0	1.0	6.0	1.0	4.0	2.0	0.1	true	0.9	0.0	true	1.0	1.0	0.0010	1.0E-4	2.0	5.0	1.0	ContinuousCorrelated	Kinesis	true	0.0	1.0	PoissonProcess	1000	0	1	land140.csv	0	2039582007	true	500	0.5	0	5.0	1.0	0.01	1.0	false	0.0	0.2379389889816478	2.137041613429891E-5	1228.2720140857152	512.5875775404469	1.2288633854897417	2.210369712735659	0.5128492574504312	-6.190874802403334E-4
248	0.01	1.0	1.0	6.0	1.0	4.0	2.0	0.1	true	0.9	0.0	true	1.0	1.0	0.0010	1.0E-4	2.0	5.0	1.0	ContinuousCorrelated	Kinesis	true	0.0	1.0	PoissonProcess	1000	0	1	land143.csv	0	2039585235	true	500	0.5	0	5.0	1.0	0.01	1.0	false	0.0	0.19035231129272182	8.904676649491788E-6	1301.8437453594343	70.06872427267125	1.302426685059482	2.3235369828813885	0.5295975980923678	3.0462055203496377E-4
249	0.01	1.0	1.0	6.0	1.0	4.0	2.0	0.1	true	0.9	0.0	true	1.0	1.0	0.0010	1.0E-4	2.0	5.0	1.0	ContinuousCorrelated	Kinesis	true	0.0	1.0	PoissonProcess	1000	0	1	land202.csv	0	2039588413	true	500	0.5	0	5.0	1.0	0.01	1.0	false	0.0	0.5415726181742704	1.588225925834209E-4	1957.4788956725624	97.21108353980998	1.958051618358878	2.479187701599417	0.5096635774855353	-5.842481732269762E-4
250	0.01	1.0	1.0	6.0	1.0	4.0	2.0	0.1	true	0.9	0.0	true	1.0	1.0	0.0010	1.0E-4	2.0	5.0	1.0	ContinuousCorrelated	Kinesis	true	0.0	1.0	PoissonProcess	1000	0	1	land204.csv	0	2039591143	true	500	0.5	0	5.0	1.0	0.01	1.0	false	0.0	0.37887540354105176	3.981719301549575E-5	1253.1659536004952	44.78296973936676	1.2537360398318067	2.3552664473907536	0.526696713727163	-0.0015881633967001452
251	0.01	1.0	1.0	6.0	1.0	4.0	2.0	0.1	true	0.9	0.0	true	1.0	1.0	0.0010	1.0E-4	2.0	5.0	1.0	ContinuousCorrelated	Kinesis	true	0.0	1.0	PoissonProcess	1000	0	1	land207.csv	0	2039594105	true	500	0.5	0	5.0	1.0	0.01	1.0	false	0.0	0.18971172722028115	1.268557654106325E-5	1303.7662358350367	100.32926189061693	1.3043418551711712	2.285327400443399	0.5272887888444242	-0.0021726980406037606
252	0.01	1.0	1.0	6.0	1.0	4.0	2.0	0.1	true	0.9	0.0	true	1.0	1.0	0.0010	1.0E-4	2.0	5.0	1.0	ContinuousCorrelated	Kinesis	true	0.0	1.0	PoissonProcess	1000	0	1	land258.csv	0	2039597252	true	500	0.5	0	5.0	1.0	0.01	1.0	false	0.0	0.3528992925050085	6.336015601504561E-5	1543.839115066866	68.02768163878325	1.5444375227073832	2.3072749644782165	0.4940174370932862	0.0028565331911542557
253	0.01	1.0	1.0	6.0	1.0	4.0	2.0	0.1	true	0.9	0.0	true	1.0	1.0	0.0010	1.0E-4	2.0	5.0	1.0	ContinuousCorrelated	Kinesis	true	0.0	1.0	PoissonProcess	1000	0	1	land260.csv	0	2039600107	true	500	0.5	0	5.0	1.0	0.01	1.0	false	0.0	0.26597204313947514	2.407104416588989E-5	1270.269398478597	53.029816150248955	1.2708672092390805	2.3949849134320575	0.5180142936408086	-0.0028929862577375507
254	0.01	1.0	1.0	6.0	1.0	4.0	2.0	0.1	true	0.9	0.0	true	1.0	1.0	0.0010	1.0E-4	2.0	5.0	1.0	ContinuousCorrelated	Kinesis	true	0.0	1.0	PoissonProcess	1000	0	1	land263.csv	0	2039603117	true	500	0.5	0	5.0	1.0	0.01	1.0	false	0.0	0.15371378372562136	8.891607045191773E-6	1594.1116512784713	110.66784293616045	1.5947069755646226	2.239001265204335	0.49907609739522313	6.341043085512984E-5
255	0.01	1.0	1.0	6.0	1.0	4.0	2.0	0.1	true	0.9	0.0	true	1.0	1.0	0.0010	1.0E-4	2.0	5.0	1.0	ContinuousCorrelated	Kinesis	true	0.0	1.0	PoissonProcess	1000	0	1	land322.csv	0	2039606215	true	500	0.5	0	5.0	1.0	0.01	1.0	false	0.0	0.2807905284204475	5.7682559231521864E-5	1761.7894922733224	70.17664169861465	1.7623734010456142	2.4114579122853463	0.5129948785335714	0.0026379102909087388
256	0.01	1.0	1.0	6.0	1.0	4.0	2.0	0.1	true	0.9	0.0	true	1.0	1.0	0.0010	1.0E-4	2.0	5.0	1.0	ContinuousCorrelated	Kinesis	true	0.0	1.0	PoissonProcess	1000	0	1	land324.csv	0	2039609068	true	500	0.5	0	5.0	1.0	0.01	1.0	false	0.0	0.1974205936872693	2.5827093021371227E-5	1586.7425647678283	60.78122220621265	1.5873254822026266	2.3332142416380623	0.47128523655708926	0.0018508142969585802
257	0.01	1.0	1.0	6.0	1.0	4.0	2.0	0.1	true	0.9	0.0	true	1.0	1.0	0.0010	1.0E-4	2.0	5.0	1.0	ContinuousCorrelated	Kinesis	true	0.0	1.0	PoissonProcess	1000	0	1	land327.csv	0	2039611966	true	500	0.5	0	5.0	1.0	0.01	1.0	false	0.0	0.16946525974463725	6.994476639239977E-6	1494.9166188774457	58.33640934883413	1.4955097775431148	2.1952457704360557	0.4914814828954195	0.003253467355790476
258	0.01	1.0	1.0	6.0	1.0	4.0	2.0	0.1	true	0.9	0.0	true	1.0	1.0	0.0010	1.0E-4	2.0	5.0	1.0	ContinuousCorrelated	Kinesis	true	0.0	1.0	PoissonProcess	1000	0	1	land378.csv	0	2039615108	true	500	0.5	0	5.0	1.0	0.01	1.0	false	0.0	0.3800979223561282	6.741657153755679E-5	1529.18810340766	72.69462157976454	1.5297823580555363	2.358245124519127	0.4864358916596809	0.0021002219060519654
259	0.01	1.0	1.0	6.0	1.0	4.0	2.0	0.1	true	0.9	0.0	true	1.0	1.0	0.0010	1.0E-4	2.0	5.0	1.0	ContinuousCorrelated	Kinesis	true	0.0	1.0	PoissonProcess	1000	0	1	land380.csv	0	2039617917	true	500	0.5	0	5.0	1.0	0.01	1.0	false	0.0	0.3052803093646469	2.9384194956134564E-5	1241.9793443927283	84.86467666635532	1.2425534193541805	2.295858958213272	0.5432707071998016	-0.004816477921950598
260	0.01	1.0	1.0	6.0	1.0	4.0	2.0	0.1	true	0.9	0.0	true	1.0	1.0	0.0010	1.0E-4	2.0	5.0	1.0	ContinuousCorrelated	Kinesis	true	0.0	1.0	PoissonProcess	1000	0	1	land383.csv	0	2039621018	true	500	0.5	0	5.0	1.0	0.01	1.0	false	0.0	0.18345880519023067	7.606935292977221E-6	1303.9537782397006	103.59830262163443	1.304553766578871	2.0982551689485716	0.5009490663732111	0.0010137326270747541
261	0.01	1.0	1.0	6.0	1.0	4.0	2.0	0.1	true	0.9	0.0	true	1.0	1.0	0.0010	1.0E-4	2.0	5.0	1.0	ContinuousCorrelated	Kinesis	true	0.0	1.0	PoissonProcess	1000	0	1	land442.csv	0	2039624177	true	500	0.5	0	5.0	1.0	0.01	1.0	false	0.0	0.5674220852080126	6.542709319123737E-5	1260.7359797217505	74.16883451389883	1.2613105348200004	2.4421438558598547	0.5412531265619576	0.005234333327179172
262	0.01	1.0	1.0	6.0	1.0	4.0	2.0	0.1	true	0.9	0.0	true	1.0	1.0	0.0010	1.0E-4	2.0	5.0	1.0	ContinuousCorrelated	Kinesis	true	0.0	1.0	PoissonProcess	1000	0	1	land444.csv	0	2039626853	true	500	0.5	0	5.0	1.0	0.01	1.0	false	0.0	0.3662526413662236	5.7454213419490945E-5	1665.8457287706765	54.66004575758363	1.6664451614739162	2.3997678941429714	0.5705767425613982	-5.513001773525165E-4
263	0.01	1.0	1.0	6.0	1.0	4.0	2.0	0.1	true	0.9	0.0	true	1.0	1.0	0.0010	1.0E-4	2.0	5.0	1.0	ContinuousCorrelated	Kinesis	true	0.0	1.0	PoissonProcess	1000	0	1	land447.csv	0	2039629842	true	500	0.5	0	5.0	1.0	0.01	1.0	false	0.0	0.1600095682847416	1.0212437885279128E-5	1428.9957884626097	73.55731624996707	1.4295900170749432	2.1718415784762115	0.48413907415317353	0.0018086897137332353
264	0.01	1.0	1.0	6.0	1.0	4.0	2.0	0.1	true	0.9	0.0	true	1.0	1.0	0.0010	1.0E-4	2.0	5.0	1.0	ContinuousCorrelated	Kinesis	true	0.0	1.0	PoissonProcess	1000	0	1	land498.csv	0	2039633068	true	500	0.5	0	5.0	1.0	0.01	1.0	false	0.0	0.4255648928708752	8.330675168433133E-5	1385.0893568707702	78.40200450083145	1.3856595447402291	2.20654492102574	0.4935119988940248	-5.433227749230445E-4
265	0.01	1.0	1.0	6.0	1.0	4.0	2.0	0.1	true	0.9	0.0	true	1.0	1.0	0.0010	1.0E-4	2.0	5.0	1.0	ContinuousCorrelated	Kinesis	true	0.0	1.0	PoissonProcess	1000	0	1	land500.csv	0	2039635953	true	500	0.5	0	5.0	1.0	0.01	1.0	false	0.0	0.24862409228000112	2.2432529014680174E-5	1217.6574872413862	75.5817950990726	1.2182484272413447	2.145281684519483	0.49868620089933274	0.002189255558171399
266	0.01	1.0	1.0	6.0	1.0	4.0	2.0	0.1	true	0.9	0.0	true	1.0	1.0	0.0010	1.0E-4	2.0	5.0	1.0	ContinuousCorrelated	Kinesis	true	0.0	1.0	PoissonProcess	1000	0	1	land503.csv	0	2039639050	true	500	0.5	0	5.0	1.0	0.01	1.0	false	0.0	0.19361820781964786	7.907619519886357E-6	1222.395075796674	184.49638950219352	1.222993769370905	2.1046513997958756	0.5030934880338946	-0.0049285720099935225
267	0.01	1.0	1.0	6.0	1.0	4.0	2.0	0.1	true	0.9	0.0	true	1.0	1.0	0.0010	1.0E-4	2.0	5.0	1.0	ContinuousCorrelated	Kinesis	true	0.0	1.0	PoissonProcess	1000	0	1	land562.csv	0	2039642263	true	500	0.5	0	5.0	1.0	0.01	1.0	false	0.0	0.20939271522292863	6.437307983239334E-5	2105.7698698951895	70.43944462100039	2.1063399054439174	2.5201737184648643	0.5334535407358643	-0.002845424831448614
268	0.01	1.0	1.0	6.0	1.0	4.0	2.0	0.1	true	0.9	0.0	true	1.0	1.0	0.0010	1.0E-4	2.0	5.0	1.0	ContinuousCorrelated	Kinesis	true	0.0	1.0	PoissonProcess	1000	0	1	land564.csv	0	2039645159	true	500	0.5	0	5.0	1.0	0.01	1.0	false	0.0	0.2188774899625504	1.6113595424610465E-5	1163.7430921597079	44.95414358065744	1.1643413629620378	2.1413632998408936	0.5259169756364348	0.0023587021489703854
269	0.01	1.0	1.0	6.0	1.0	4.0	2.0	0.1	true	0.9	0.0	true	1.0	1.0	0.0010	1.0E-4	2.0	5.0	1.0	ContinuousCorrelated	Kinesis	true	0.0	1.0	PoissonProcess	1000	0	1	land567.csv	0	2039648219	true	500	0.5	0	5.0	1.0	0.01	1.0	false	0.0	0.2228075506553983	1.0612036651559787E-5	1121.880415247807	55.584363509750595	1.1224781884267687	2.3109541215000378	0.5069530087598004	0.0022905569361427844
270	0.01	1.0	1.0	6.0	1.0	4.0	2.0	0.1	true	0.9	0.0	true	1.0	1.0	0.0010	1.0E-4	2.0	5.0	1.0	ContinuousCorrelated	Kinesis	true	0.0	1.0	PoissonProcess	1000	0	1	land618.csv	0	2039651390	true	500	0.5	0	5.0	1.0	0.01	1.0	false	0.0	0.35383762365195015	6.934670156637702E-5	1721.1807641963449	103.36871629062769	1.7217758989778464	2.445294472926658	0.5230878471327891	0.004829396904261451
271	0.01	1.0	1.0	6.0	1.0	4.0	2.0	0.1	true	0.9	0.0	true	1.0	1.0	0.0010	1.0E-4	2.0	5.0	1.0	ContinuousCorrelated	Kinesis	true	0.0	1.0	PoissonProcess	1000	0	1	land620.csv	0	2039654214	true	500	0.5	0	5.0	1.0	0.01	1.0	false	0.0	0.26241212940328684	2.7299220870989657E-5	1224.7705776922126	57.1725534307895	1.2253432548233263	2.0761436843690966	0.49795702225489596	-0.003592379510666974
272	0.01	1.0	1.0	6.0	1.0	4.0	2.0	0.1	true	0.9	0.0	true	1.0	1.0	0.0010	1.0E-4	2.0	5.0	1.0	ContinuousCorrelated	Kinesis	true	0.0	1.0	PoissonProcess	1000	0	1	land623.csv	0	2039657278	true	500	0.5	0	5.0	1.0	0.01	1.0	false	0.0	0.20980874488636886	8.459472485837093E-6	1130.2871867157405	53.841242550803955	1.1308823398989603	2.271355028981631	0.5097351817733023	-5.745484096865539E-4
273	0.01	1.0	1.0	6.0	1.0	4.0	2.0	0.1	true	0.9	0.0	true	1.0	1.0	0.0010	1.0E-4	2.0	5.0	1.0	ContinuousCorrelated	Kinesis	true	0.0	1.0	PoissonProcess	1000	0	1	land682.csv	0	2039660464	true	500	0.5	0	5.0	1.0	0.01	1.0	false	0.0	0.12050465616332652	4.230954746786355E-5	2131.16967031085	273.7770227119604	2.131752476111527	2.382085449889431	0.5041186548563656	-3.169303678609081E-4
274	0.01	1.0	1.0	6.0	1.0	4.0	2.0	0.1	true	0.9	0.0	true	1.0	1.0	0.0010	1.0E-4	2.0	5.0	1.0	ContinuousCorrelated	Kinesis	true	0.0	1.0	PoissonProcess	1000	0	1	land684.csv	0	2039663397	true	500	0.5	0	5.0	1.0	0.01	1.0	false	0.0	0.193184801089889	4.519186000757339E-5	1934.0368515346192	73.81536949308106	1.9346287701401084	2.3714406745592833	0.5267958079242657	7.762426441178487E-4
275	0.01	1.0	1.0	6.0	1.0	4.0	2.0	0.1	true	0.9	0.0	true	1.0	1.0	0.0010	1.0E-4	2.0	5.0	1.0	ContinuousCorrelated	Kinesis	true	0.0	1.0	PoissonProcess	1000	0	1	land687.csv	0	2039666441	true	500	0.5	0	5.0	1.0	0.01	1.0	false	0.0	0.1774580564061803	6.967086349992452E-6	1426.5836728684933	664.0191324029505	1.42718011571153	2.235222523352717	0.5369408763556862	-0.005416783986912191
276	0.01	1.0	1.0	6.0	1.0	4.0	2.0	0.1	true	0.9	0.0	true	1.0	1.0	0.0010	1.0E-4	2.0	5.0	1.0	ContinuousCorrelated	Kinesis	true	0.0	1.0	PoissonProcess	1000	0	1	land738.csv	0	2039669586	true	500	0.5	0	5.0	1.0	0.01	1.0	false	0.0	0.3048750301959385	6.846409041985135E-5	1751.7318184172473	113.98987448389904	1.752308714661991	2.35090416170152	0.5192167472598845	7.17466958776536E-4
277	0.01	1.0	1.0	6.0	1.0	4.0	2.0	0.1	true	0.9	0.0	true	1.0	1.0	0.0010	1.0E-4	2.0	5.0	1.0	ContinuousCorrelated	Kinesis	true	0.0	1.0	PoissonProcess	1000	0	1	land740.csv	0	2039672392	true	500	0.5	0	5.0	1.0	0.01	1.0	false	0.0	0.251765726677643	2.13463307752901E-5	1149.40464163433	46.39842259086211	1.1499879272417457	2.0557126938643813	0.5137910618884941	0.0013133193027964
278	0.01	1.0	1.0	6.0	1.0	4.0	2.0	0.1	true	0.9	0.0	true	1.0	1.0	0.0010	1.0E-4	2.0	5.0	1.0	ContinuousCorrelated	Kinesis	true	0.0	1.0	PoissonProcess	1000	0	1	land743.csv	0	2039675537	true	500	0.5	0	5.0	1.0	0.01	1.0	false	0.0	0.2061119598285056	8.639249675986176E-6	1168.673289103656	47.292276633418716	1.1692682425320153	2.095242928608998	0.5236633527824647	-0.0016637158931153162
279	0.01	1.0	1.0	6.0	1.0	4.0	2.0	0.1	true	0.9	0.0	true	1.0	1.0	0.0010	1.0E-4	2.0	5.0	1.0	ContinuousCorrelated	Kinesis	true	0.0	1.0	PoissonProcess	1000	0	1	land802.csv	0	2039678881	true	500	0.5	0	5.0	1.0	0.01	1.0	false	0.0	0.4410993527928569	8.640694365921677E-5	1636.0303177183384	86.53898145426409	1.6366016173614857	2.360868478688151	0.5066266422143539	-0.002892593510896195
280	0.01	1.0	1.0	6.0	1.0	4.0	2.0	0.1	true	0.9	0.0	true	1.0	1.0	0.0010	1.0E-4	2.0	5.0	1.0	ContinuousCorrelated	Kinesis	true	0.0	1.0	PoissonProcess	1000	0	1	land804.csv	0	2039681797	true	500	0.5	0	5.0	1.0	0.01	1.0	false	0.0	0.32848000583755116	5.097337928752101E-5	1536.4076993388617	231.1162043002444	1.5369931911479076	2.4140443640177534	0.5049212188939974	-0.004618574862013757
281	0.01	1.0	1.0	6.0	1.0	4.0	2.0	0.1	true	0.9	0.0	true	1.0	1.0	0.0010	1.0E-4	2.0	5.0	1.0	ContinuousCorrelated	Kinesis	true	0.0	1.0	PoissonProcess	1000	0	1	land807.csv	0	2039684537	true	500	0.5	0	5.0	1.0	0.01	1.0	false	0.0	0.17195106569933444	1.173723079032712E-5	1343.1584679356295	46.74494691120868	1.343751160041219	2.2089747963223294	0.5117923006748132	0.005686373912885701
282	0.01	1.0	1.0	6.0	1.0	4.0	2.0	0.1	true	0.9	0.0	true	1.0	1.0	0.0010	1.0E-4	2.0	5.0	1.0	ContinuousCorrelated	Kinesis	true	0.0	1.0	PoissonProcess	1000	0	1	land858.csv	0	2039687675	true	500	0.5	0	5.0	1.0	0.01	1.0	false	0.0	0.35494216926505484	6.929614209414976E-5	1556.2988992473954	63.55175348783819	1.5568710325047133	2.2210447060864693	0.5180352866460702	0.0028338281626198464
283	0.01	1.0	1.0	6.0	1.0	4.0	2.0	0.1	true	0.9	0.0	true	1.0	1.0	0.0010	1.0E-4	2.0	5.0	1.0	ContinuousCorrelated	Kinesis	true	0.0	1.0	PoissonProcess	1000	0	1	land860.csv	0	2039690546	true	500	0.5	0	5.0	1.0	0.01	1.0	false	0.0	0.26159331460172225	2.3138561704099785E-5	1229.9879238334195	57.302428307889244	1.2305579275646272	2.214572696534188	0.5238256708132946	-0.00411401866798003
284	0.01	1.0	1.0	6.0	1.0	4.0	2.0	0.1	true	0.9	0.0	true	1.0	1.0	0.0010	1.0E-4	2.0	5.0	1.0	ContinuousCorrelated	Kinesis	true	0.0	1.0	PoissonProcess	1000	0	1	land863.csv	0	2039693670	true	500	0.5	0	5.0	1.0	0.01	1.0	false	0.0	0.20762286552922452	8.38575068938664E-6	1083.8320958723361	41.613434853778976	1.0844062741008247	2.1230489780166795	0.5211940984425665	-0.0014906483999246017
285	0.01	1.0	1.0	6.0	1.0	4.0	2.0	0.1	true	0.9	0.0	true	1.0	1.0	0.0010	1.0E-4	2.0	5.0	1.0	ContinuousCorrelated	Kinesis	true	0.0	1.0	PoissonProcess	1000	0	1	land922.csv	0	2039696804	true	500	0.5	0	5.0	1.0	0.01	1.0	false	0.0	0.3769458183530105	7.447002539809214E-5	1691.1590047063958	139.03990103524112	1.6917583485507781	2.3078617840778803	0.49472630577563864	-0.005218863410674356
286	0.01	1.0	1.0	6.0	1.0	4.0	2.0	0.1	true	0.9	0.0	true	1.0	1.0	0.0010	1.0E-4	2.0	5.0	1.0	ContinuousCorrelated	Kinesis	true	0.0	1.0	PoissonProcess	1000	0	1	land924.csv	0	2039699683	true	500	0.5	0	5.0	1.0	0.01	1.0	false	0.0	0.20486670994727818	1.8494253005561373E-5	1259.0344570066063	126.7414185540547	1.2596264926885463	2.092885989344884	0.5057250433328017	-0.0017843070753837168
287	0.01	1.0	1.0	6.0	1.0	4.0	2.0	0.1	true	0.9	0.0	true	1.0	1.0	0.0010	1.0E-4	2.0	5.0	1.0	ContinuousCorrelated	Kinesis	true	0.0	1.0	PoissonProcess	1000	0	1	land927.csv	0	2039703327	true	500	0.5	0	5.0	1.0	0.01	1.0	false	0.0	0.16341963910057983	1.2761657085568536E-5	1511.7050946601091	67.45831462519618	1.5122986725310357	2.3632691480647674	0.5177465379287066	0.0016470925085243504
288	0.01	1.0	1.0	6.0	1.0	4.0	2.0	0.1	true	0.9	0.0	true	1.0	1.0	0.0010	1.0E-4	2.0	5.0	1.0	ContinuousCorrelated	Kinesis	true	0.0	1.0	PoissonProcess	1000	0	1	land978.csv	0	2039706564	true	500	0.5	0	5.0	1.0	0.01	1.0	false	0.0	0.282887053925977	5.06013359966209E-5	1729.547654990845	77.36555972831574	1.730123553563141	2.578348844954468	0.5290004724216771	0.00716970296139243
289	0.01	1.0	1.0	6.0	1.0	4.0	2.0	0.1	true	0.9	0.0	true	1.0	1.0	0.0010	1.0E-4	2.0	5.0	1.0	ContinuousCorrelated	Kinesis	true	0.0	1.0	PoissonProcess	1000	0	1	land980.csv	0	2039709503	true	500	0.5	0	5.0	1.0	0.01	1.0	false	0.0	0.2657759957128989	2.2807210568476315E-5	1165.0007750550008	54.0495869817541	1.165590566970019	2.119205604717833	0.5007143661777619	0.003744092568554085
290	0.01	1.0	1.0	6.0	1.0	4.0	2.0	0.1	true	0.9	0.0	true	1.0	1.0	0.0010	1.0E-4	2.0	5.0	1.0	ContinuousCorrelated	Kinesis	true	0.0	1.0	PoissonProcess	1000	0	1	land983.csv	0	2039712678	true	500	0.5	0	5.0	1.0	0.01	1.0	false	0.0	0.19283069280076315	8.750587089354405E-6	1279.3577920492112	92.60872244230927	1.279950539315014	2.266919064442542	0.5182150865411905	-5.449056058921733E-4
291	0.01	1.0	1.0	6.0	1.0	4.0	2.0	0.1	true	0.9	0.0	true	1.0	1.0	0.0010	1.0E-4	2.0	5.0	1.0	ContinuousCorrelated	Kinesis	true	0.0	1.0	PoissonProcess	1000	0	1	land1042.csv	0	2039715820	true	500	0.5	0	5.0	1.0	0.01	1.0	false	0.0	0.23099251828448336	5.453383742424607E-5	1891.3218345029982	155.91215770809475	1.891921810270923	2.3327591008506388	0.49363815558692076	0.0021772489143303203
292	0.01	1.0	1.0	6.0	1.0	4.0	2.0	0.1	true	0.9	0.0	true	1.0	1.0	0.0010	1.0E-4	2.0	5.0	1.0	ContinuousCorrelated	Kinesis	true	0.0	1.0	PoissonProcess	1000	0	1	land1044.csv	0	2039718668	true	500	0.5	0	5.0	1.0	0.01	1.0	false	0.0	0.32026475605742427	3.463825809386332E-5	1285.643672642521	48.22002195905494	1.2862142730245099	2.2982207631512264	0.5255697031990252	-0.002739909622096534
293	0.01	1.0	1.0	6.0	1.0	4.0	2.0	0.1	true	0.9	0.0	true	1.0	1.0	0.0010	1.0E-4	2.0	5.0	1.0	ContinuousCorrelated	Kinesis	true	0.0	1.0	PoissonProcess	1000	0	1	land1047.csv	0	2039721591	true	500	0.5	0	5.0	1.0	0.01	1.0	false	0.0	0.22062696912430152	9.174019719635442E-6	977.0694533363226	71.98488228329171	0.9776678701019393	2.072932824006095	0.4846715799455421	-0.001686655235198476
294	0.01	1.0	1.0	6.0	1.0	4.0	2.0	0.1	true	0.9	0.0	true	1.0	1.0	0.0010	1.0E-4	2.0	5.0	1.0	ContinuousCorrelated	Kinesis	true	0.0	1.0	PoissonProcess	1000	0	1	land1098.csv	0	2039724824	true	500	0.5	0	5.0	1.0	0.01	1.0	false	0.0	0.3589373313642913	6.20875921888604E-5	1547.3834573123493	109.6392342357119	1.547973964544906	2.22110421937977	0.5039352019439145	3.2944266576164313E-4
295	0.01	1.0	1.0	6.0	1.0	4.0	2.0	0.1	true	0.9	0.0	true	1.0	1.0	0.0010	1.0E-4	2.0	5.0	1.0	ContinuousCorrelated	Kinesis	true	0.0	1.0	PoissonProcess	1000	0	1	land1100.csv	0	2039727658	true	500	0.5	0	5.0	1.0	0.01	1.0	false	0.0	0.3064792123820018	3.234052324073178E-5	1277.8725846570794	46.26614282170276	1.2784711525527932	2.3603787336711757	0.4959851766861974	1.540471688727869E-4
296	0.01	1.0	1.0	6.0	1.0	4.0	2.0	0.1	true	0.9	0.0	true	1.0	1.0	0.0010	1.0E-4	2.0	5.0	1.0	ContinuousCorrelated	Kinesis	true	0.0	1.0	PoissonProcess	1000	0	1	land1103.csv	0	2039730648	true	500	0.5	0	5.0	1.0	0.01	1.0	false	0.0	0.18255851106330806	8.467821103272908E-6	1304.1434955827358	61.42903705472261	1.3047431269052396	2.1577330666941883	0.530200268012731	-0.006672962106046017
297	0.01	1.0	1.0	6.0	1.0	4.0	2.0	0.1	true	0.9	0.0	true	1.0	1.0	0.0010	1.0E-4	2.0	5.0	1.0	ContinuousCorrelated	Kinesis	true	0.0	1.0	PoissonProcess	1000	0	1	land1162.csv	0	2039733888	true	500	0.5	0	5.0	1.0	0.01	1.0	false	0.0	0.43379957744537956	7.562944036297653E-5	1471.0548282262657	92.8704739163285	1.4716266406697849	2.2361436108753763	0.5127058962550118	2.5178911142404283E-4
298	0.01	1.0	1.0	6.0	1.0	4.0	2.0	0.1	true	0.9	0.0	true	1.0	1.0	0.0010	1.0E-4	2.0	5.0	1.0	ContinuousCorrelated	Kinesis	true	0.0	1.0	PoissonProcess	1000	0	1	land1164.csv	0	2039736732	true	500	0.5	0	5.0	1.0	0.01	1.0	false	0.0	0.2807834156951211	4.474263122432731E-5	1663.8328265078067	169.2780489557562	1.664403389766091	2.4821951139934404	0.5229432591124017	7.438730744178457E-4
299	0.01	1.0	1.0	6.0	1.0	4.0	2.0	0.1	true	0.9	0.0	true	1.0	1.0	0.0010	1.0E-4	2.0	5.0	1.0	ContinuousCorrelated	Kinesis	true	0.0	1.0	PoissonProcess	1000	0	1	land1167.csv	0	2039739588	true	500	0.5	0	5.0	1.0	0.01	1.0	false	0.0	0.21286271539974855	1.0013744255436232E-5	1194.6903649176224	43.46257757956279	1.1952820466938647	2.2416978435672643	0.5259808459063373	-0.0035902562741103646
300	0.01	1.0	1.0	6.0	1.0	4.0	2.0	0.1	true	0.9	0.0	true	1.0	1.0	0.0010	1.0E-4	2.0	5.0	1.0	ContinuousCorrelated	Kinesis	true	0.0	1.0	PoissonProcess	1000	0	1	land1218.csv	0	2039742642	true	500	0.5	0	5.0	1.0	0.01	1.0	false	0.0	0.3921913409868405	6.802330926914394E-5	1599.1102277633393	108.8333957471993	1.5997098139422812	2.5401583435446273	0.4782233959402833	0.0027880696746215025
301	0.01	1.0	1.0	6.0	1.0	4.0	2.0	0.1	true	0.9	0.0	true	1.0	1.0	0.0010	1.0E-4	2.0	5.0	1.0	ContinuousCorrelated	Kinesis	true	0.0	1.0	PoissonProcess	1000	0	1	land1220.csv	0	2039745481	true	500	0.5	0	5.0	1.0	0.01	1.0	false	0.0	0.2347553188512807	2.2548767729370533E-5	1310.5160551489846	53.43237028673056	1.3110860722804714	2.277345149355247	0.5056930095041666	6.475248714009963E-4
302	0.01	1.0	1.0	6.0	1.0	4.0	2.0	0.1	true	0.9	0.0	true	1.0	1.0	0.0010	1.0E-4	2.0	5.0	1.0	ContinuousCorrelated	Kinesis	true	0.0	1.0	PoissonProcess	1000	0	1	land1223.csv	0	2039748556	true	500	0.5	0	5.0	1.0	0.01	1.0	false	0.0	0.19078930906427705	8.666556864223273E-6	1300.4987886644813	65.7618971511732	1.3010985961374124	2.2710349649044823	0.4984904313389389	0.004335200841294675
303	0.01	1.0	1.0	6.0	1.0	4.0	2.0	0.1	true	0.9	0.0	true	1.0	1.0	0.0010	1.0E-4	2.0	5.0	1.0	ContinuousCorrelated	Kinesis	true	0.0	1.0	PoissonProcess	1000	0	1	land1282.csv	0	2039751827	true	500	0.5	0	5.0	1.0	0.01	1.0	false	0.0	0.14056940087098527	2.6502228025236393E-5	1872.9951187132338	76.63075237801897	1.8735691719946204	2.363789484412069	0.5083000354436837	0.0027222656038696463
304	0.01	1.0	1.0	6.0	1.0	4.0	2.0	0.1	true	0.9	0.0	true	1.0	1.0	0.0010	1.0E-4	2.0	5.0	1.0	ContinuousCorrelated	Kinesis	true	0.0	1.0	PoissonProcess	1000	0	1	land1284.csv	0	2039754890	true	500	0.5	0	5.0	1.0	0.01	1.0	false	0.0	0.22163486485203432	1.4255640961229676E-5	1105.6468159718577	56.902704479371735	1.1062454582106231	2.2271683001051605	0.5357199193981513	0.005586980633590227
305	0.01	1.0	1.0	6.0	1.0	4.0	2.0	0.1	true	0.9	0.0	true	1.0	1.0	0.0010	1.0E-4	2.0	5.0	1.0	ContinuousCorrelated	Kinesis	true	0.0	1.0	PoissonProcess	1000	0	1	land1287.csv	0	2039758023	true	500	0.5	0	5.0	1.0	0.01	1.0	false	0.0	0.22508146725823636	1.2414902358716712E-5	1082.3384955870858	52.955428846736474	1.0829094295986406	2.1659040847633353	0.5134862404473556	0.005810246941439318
306	0.01	1.0	1.0	6.0	1.0	4.0	2.0	0.1	true	0.9	0.0	true	1.0	1.0	0.0010	1.0E-4	2.0	5.0	1.0	ContinuousCorrelated	Kinesis	true	0.0	1.0	PoissonProcess	1000	0	1	land1338.csv	0	2039761308	true	500	0.5	0	5.0	1.0	0.01	1.0	false	0.0	0.3620308532046477	6.033685509596574E-5	1390.0625646962296	55.69072508373916	1.3906571718058487	2.229601295701288	0.4983917952979953	-0.0051735545215387604
307	0.01	1.0	1.0	6.0	1.0	4.0	2.0	0.1	true	0.9	0.0	true	1.0	1.0	0.0010	1.0E-4	2.0	5.0	1.0	ContinuousCorrelated	Kinesis	true	0.0	1.0	PoissonProcess	1000	0	1	land1340.csv	0	2039764071	true	500	0.5	0	5.0	1.0	0.01	1.0	false	0.0	0.2607339697073609	2.3996246809217E-5	1286.358449113987	102.70612064173278	1.2869286865193663	2.256347705776994	0.5384334416309253	-1.4020859246325586E-6
308	0.01	1.0	1.0	6.0	1.0	4.0	2.0	0.1	true	0.9	0.0	true	1.0	1.0	0.0010	1.0E-4	2.0	5.0	1.0	ContinuousCorrelated	Kinesis	true	0.0	1.0	PoissonProcess	1000	0	1	land1343.csv	0	2039767162	true	500	0.5	0	5.0	1.0	0.01	1.0	false	0.0	0.18978179779023047	9.117913270286923E-6	1246.403650881117	86.57258314089033	1.2469736741590771	2.1952019364806414	0.494954021254585	0.0017246005920570236
309	0.01	1.0	1.0	6.0	1.0	4.0	2.0	0.1	true	0.9	0.0	true	1.0	1.0	0.0010	1.0E-4	2.0	5.0	1.0	ContinuousCorrelated	Kinesis	true	0.0	1.0	PoissonProcess	1000	0	1	land1402.csv	0	2039770242	true	500	0.5	0	5.0	1.0	0.01	1.0	false	0.0	0.6861044890916183	1.504234522626287E-4	1858.8359305132092	444.59953246932355	1.8594154337423354	2.4914366392784943	0.5322884510077036	-8.097306585612115E-4
310	0.01	1.0	1.0	6.0	1.0	4.0	2.0	0.1	true	0.9	0.0	true	1.0	1.0	0.0010	1.0E-4	2.0	5.0	1.0	ContinuousCorrelated	Kinesis	true	0.0	1.0	PoissonProcess	1000	0	1	land1404.csv	0	2039773016	true	500	0.5	0	5.0	1.0	0.01	1.0	false	0.0	0.4298151555628812	4.3707930475681795E-5	1202.9231296415035	111.82551691506546	1.2035226591421169	2.28954650126741	0.5233668913710086	0.0048890821820802895
311	0.01	1.0	1.0	6.0	1.0	4.0	2.0	0.1	true	0.9	0.0	true	1.0	1.0	0.0010	1.0E-4	2.0	5.0	1.0	ContinuousCorrelated	Kinesis	true	0.0	1.0	PoissonProcess	1000	0	1	land1407.csv	0	2039776118	true	500	0.5	0	5.0	1.0	0.01	1.0	false	0.0	0.16060926195778183	8.704500802408986E-6	1515.2475051847666	83.87646801985893	1.5158294884495473	2.12125327659988	0.491140761386278	-0.002329900767350499
312	0.01	1.0	1.0	6.0	1.0	4.0	2.0	0.1	true	0.9	0.0	true	1.0	1.0	0.0010	1.0E-4	2.0	5.0	1.0	ContinuousCorrelated	Kinesis	true	0.0	1.0	PoissonProcess	1000	0	1	land1458.csv	0	2039779158	true	500	0.5	0	5.0	1.0	0.01	1.0	false	0.0	0.42779407183348545	6.328541435499202E-5	1401.4878596949845	69.18436959582428	1.4020585248353892	2.412574417488692	0.49908096425388726	7.643639414088671E-4
313	0.01	1.0	1.0	6.0	1.0	4.0	2.0	0.1	true	0.9	0.0	true	1.0	1.0	0.0010	1.0E-4	2.0	5.0	1.0	ContinuousCorrelated	Kinesis	true	0.0	1.0	PoissonProcess	1000	0	1	land1460.csv	0	2039782007	true	500	0.5	0	5.0	1.0	0.01	1.0	false	0.0	0.2508895204466158	2.2854868222604947E-5	1297.8531339407639	47.19355159619791	1.298433444532089	2.287841745218676	0.5076900707195829	0.001720696100885522
314	0.01	1.0	1.0	6.0	1.0	4.0	2.0	0.1	true	0.9	0.0	true	1.0	1.0	0.0010	1.0E-4	2.0	5.0	1.0	ContinuousCorrelated	Kinesis	true	0.0	1.0	PoissonProcess	1000	0	1	land1463.csv	0	2039785072	true	500	0.5	0	5.0	1.0	0.01	1.0	false	0.0	0.18181270703646227	8.326575256357558E-6	1244.7549804115242	56.534476800584706	1.2453545883121626	2.0172551827321445	0.5049107579281068	0.007636831206170764
315	0.01	1.0	1.0	6.0	1.0	4.0	2.0	0.1	true	0.9	0.0	true	1.0	1.0	0.0010	1.0E-4	2.0	5.0	1.0	ContinuousCorrelated	Kinesis	true	0.0	1.0	PoissonProcess	1000	0	1	land1522.csv	0	2039788103	true	500	0.5	0	5.0	1.0	0.01	1.0	false	0.0	0.3612417885814246	7.004322384386549E-5	1639.00364180306	78.11055499987758	1.6395905611991537	2.2728253821712374	0.5302969810372676	0.005182188687427283
316	0.01	1.0	1.0	6.0	1.0	4.0	2.0	0.1	true	0.9	0.0	true	1.0	1.0	0.0010	1.0E-4	2.0	5.0	1.0	ContinuousCorrelated	Kinesis	true	0.0	1.0	PoissonProcess	1000	0	1	land1524.csv	0	2039790962	true	500	0.5	0	5.0	1.0	0.01	1.0	false	0.0	0.1547205547349464	1.8113438025696576E-5	1665.4793486530602	69.6596176297898	1.6660603610097915	2.3592350181410646	0.516665488286548	-9.685527870938285E-4
317	0.01	1.0	1.0	6.0	1.0	4.0	2.0	0.1	true	0.9	0.0	true	1.0	1.0	0.0010	1.0E-4	2.0	5.0	1.0	ContinuousCorrelated	Kinesis	true	0.0	1.0	PoissonProcess	1000	0	1	land1527.csv	0	2039794023	true	500	0.5	0	5.0	1.0	0.01	1.0	false	0.0	0.20776944475471112	1.5096741523203566E-5	1301.8076817101194	43.65032464494733	1.3023779431474998	2.19191293182023	0.5135450286641311	0.00279457712437725
318	0.01	1.0	1.0	6.0	1.0	4.0	2.0	0.1	true	0.9	0.0	true	1.0	1.0	0.0010	1.0E-4	2.0	5.0	1.0	ContinuousCorrelated	Kinesis	true	0.0	1.0	PoissonProcess	1000	0	1	land1578.csv	0	2039797200	true	500	0.5	0	5.0	1.0	0.01	1.0	false	0.0	0.2756478922051281	3.94374682810352E-5	1456.0117195175833	62.79117167899568	1.4566091571316064	2.2642926919181754	0.47738221672665404	0.0031817446133876465
319	0.01	1.0	1.0	6.0	1.0	4.0	2.0	0.1	true	0.9	0.0	true	1.0	1.0	0.0010	1.0E-4	2.0	5.0	1.0	ContinuousCorrelated	Kinesis	true	0.0	1.0	PoissonProcess	1000	0	1	land1580.csv	0	2039800021	true	500	0.5	0	5.0	1.0	0.01	1.0	false	0.0	0.2448632970541785	2.7176873681398704E-5	1305.2787865659307	52.21972893522114	1.3058579317813703	2.105361745835953	0.5114546205277654	-0.003159589633282107
320	0.01	1.0	1.0	6.0	1.0	4.0	2.0	0.1	true	0.9	0.0	true	1.0	1.0	0.0010	1.0E-4	2.0	5.0	1.0	ContinuousCorrelated	Kinesis	true	0.0	1.0	PoissonProcess	1000	0	1	land1583.csv	0	2039803073	true	500	0.5	0	5.0	1.0	0.01	1.0	false	0.0	0.1875932581740209	8.518018740856117E-6	1291.6672393444971	44.6096055874407	1.2922499093675694	2.269760291135199	0.5185772352992444	0.002649373646296038
321	0.01	1.0	1.0	6.0	1.0	4.0	2.0	0.1	true	0.9	0.0	true	1.0	1.0	0.0010	1.0E-4	2.0	5.0	1.0	ContinuousCorrelated	Kinesis	true	0.0	1.0	PoissonProcess	1000	0	1	land1642.csv	0	2039806238	true	500	0.5	0	5.0	1.0	0.01	1.0	false	0.0	0.6145630104152976	1.5014247588867268E-4	1782.0984407760625	71.4062151120125	1.782668966305175	2.3821109234293565	0.5354012588446989	0.001027352017217593
322	0.01	1.0	1.0	6.0	1.0	4.0	2.0	0.1	true	0.9	0.0	true	1.0	1.0	0.0010	1.0E-4	2.0	5.0	1.0	ContinuousCorrelated	Kinesis	true	0.0	1.0	PoissonProcess	1000	0	1	land1644.csv	0	2039809086	true	500	0.5	0	5.0	1.0	0.01	1.0	false	0.0	0.2797934880004378	3.631942717662536E-5	1424.4857645047487	75.81587745160952	1.4250557857236539	2.32271205491447	0.5291930355521949	0.0012606096856429374
323	0.01	1.0	1.0	6.0	1.0	4.0	2.0	0.1	true	0.9	0.0	true	1.0	1.0	0.0010	1.0E-4	2.0	5.0	1.0	ContinuousCorrelated	Kinesis	true	0.0	1.0	PoissonProcess	1000	0	1	land1647.csv	0	2039812043	true	500	0.5	0	5.0	1.0	0.01	1.0	false	0.0	0.1827266376673704	5.9780553537667585E-6	1322.6937790920947	71.39498073761061	1.3232839532922842	2.0461345818517263	0.5107679111647243	-0.00402261690703845
324	0.01	1.0	1.0	6.0	1.0	4.0	2.0	0.1	true	0.9	0.0	true	1.0	1.0	0.0010	1.0E-4	2.0	5.0	1.0	ContinuousCorrelated	Kinesis	true	0.0	1.0	PoissonProcess	1000	0	1	land1698.csv	0	2039815128	true	500	0.5	0	5.0	1.0	0.01	1.0	false	0.0	0.32938846042249476	6.871550484754698E-5	1654.162937202352	65.0999466427443	1.6547532562228768	2.2452854055615954	0.5084261428006529	0.001839391916930435
325	0.01	1.0	1.0	6.0	1.0	4.0	2.0	0.1	true	0.9	0.0	true	1.0	1.0	0.0010	1.0E-4	2.0	5.0	1.0	ContinuousCorrelated	Kinesis	true	0.0	1.0	PoissonProcess	1000	0	1	land1700.csv	0	2039818087	true	500	0.5	0	5.0	1.0	0.01	1.0	false	0.0	0.2414130971307793	2.6948299165000126E-5	1394.5932713729233	71.14397974038476	1.3951858520209377	2.3129473619819603	0.4861927641296059	0.00673859535567327
326	0.01	1.0	1.0	6.0	1.0	4.0	2.0	0.1	true	0.9	0.0	true	1.0	1.0	0.0010	1.0E-4	2.0	5.0	1.0	ContinuousCorrelated	Kinesis	true	0.0	1.0	PoissonProcess	1000	0	1	land1703.csv	0	2039821174	true	500	0.5	0	5.0	1.0	0.01	1.0	false	0.0	0.19162817014625416	8.045638867587506E-6	1315.7023373442094	72.14241420142199	1.316274888098448	2.288414489148044	0.5020499153707613	-0.004818239196222442
327	0.01	1.0	1.0	6.0	1.0	4.0	2.0	0.1	true	0.9	0.0	true	1.0	1.0	0.0010	1.0E-4	2.0	5.0	1.0	ContinuousCorrelated	Kinesis	true	0.0	1.0	PoissonProcess	1000	0	1	land1762.csv	0	2039824261	true	500	0.5	0	5.0	1.0	0.01	1.0	false	0.0	0.40301686880973114	8.077795470424467E-5	1773.0657431797256	146.81948052224143	1.7736621409450297	2.3653294652574584	0.5163690767811019	0.0012913028434436544
328	0.01	1.0	1.0	6.0	1.0	4.0	2.0	0.1	true	0.9	0.0	true	1.0	1.0	0.0010	1.0E-4	2.0	5.0	1.0	ContinuousCorrelated	Kinesis	true	0.0	1.0	PoissonProcess	1000	0	1	land1764.csv	0	2039827104	true	500	0.5	0	5.0	1.0	0.01	1.0	false	0.0	0.3044699612197501	2.9835348600506817E-5	1101.6125397384499	46.903447093375505	1.1021828222180536	1.9550579144289075	0.5206901172360836	-0.0013882199856673828
329	0.01	1.0	1.0	6.0	1.0	4.0	2.0	0.1	true	0.9	0.0	true	1.0	1.0	0.0010	1.0E-4	2.0	5.0	1.0	ContinuousCorrelated	Kinesis	true	0.0	1.0	PoissonProcess	1000	0	1	land1767.csv	0	2039830199	true	500	0.5	0	5.0	1.0	0.01	1.0	false	0.0	0.20443766152465054	1.1662821377598186E-5	1160.90924770996	73.96251491274366	1.1614939399292372	2.0460783466418073	0.4936311604140699	-3.8595062067744935E-4
330	0.01	1.0	1.0	6.0	1.0	4.0	2.0	0.1	true	0.9	0.0	true	1.0	1.0	0.0010	1.0E-4	2.0	5.0	1.0	ContinuousCorrelated	Kinesis	true	0.0	1.0	PoissonProcess	1000	0	1	land1818.csv	0	2039833141	true	500	0.5	0	5.0	1.0	0.01	1.0	false	0.0	0.3783041055298341	6.74041181323049E-5	1538.0843087704854	96.70990157302424	1.5386596966998278	2.36503580642036	0.501309803442155	8.900681685480565E-5
331	0.01	1.0	1.0	6.0	1.0	4.0	2.0	0.1	true	0.9	0.0	true	1.0	1.0	0.0010	1.0E-4	2.0	5.0	1.0	ContinuousCorrelated	Kinesis	true	0.0	1.0	PoissonProcess	1000	0	1	land1820.csv	0	2039836076	true	500	0.5	0	5.0	1.0	0.01	1.0	false	0.0	0.21375232521629234	1.6974605297450048E-5	1218.641746901553	98.79990460235031	1.2192117558959348	2.04540172887364	0.5114433683505967	0.0021879695136104668
332	0.01	1.0	1.0	6.0	1.0	4.0	2.0	0.1	true	0.9	0.0	true	1.0	1.0	0.0010	1.0E-4	2.0	5.0	1.0	ContinuousCorrelated	Kinesis	true	0.0	1.0	PoissonProcess	1000	0	1	land1823.csv	0	2039839261	true	500	0.5	0	5.0	1.0	0.01	1.0	false	0.0	0.19714077619710452	8.307371410129579E-6	1263.6669727028798	72.17306937173382	1.264243100834226	2.190027001874921	0.48915634040019323	-0.001818463321194796
333	0.01	1.0	1.0	6.0	1.0	4.0	2.0	0.1	true	0.9	0.0	true	1.0	1.0	0.0010	1.0E-4	2.0	5.0	1.0	ContinuousCorrelated	Kinesis	true	0.0	1.0	PoissonProcess	1000	0	1	land1882.csv	0	2039842397	true	500	0.5	0	5.0	1.0	0.01	1.0	false	0.0	0.5748951358832214	2.343695215516494E-4	2140.4006732014345	137.69160789660555	2.140998581258829	2.4180788359573615	0.4939104005508412	-0.00537567326390849
334	0.01	1.0	1.0	6.0	1.0	4.0	2.0	0.1	true	0.9	0.0	true	1.0	1.0	0.0010	1.0E-4	2.0	5.0	1.0	ContinuousCorrelated	Kinesis	true	0.0	1.0	PoissonProcess	1000	0	1	land1884.csv	0	2039845213	true	500	0.5	0	5.0	1.0	0.01	1.0	false	0.0	0.10606250442051034	1.6227668775971826E-5	1895.1076133414756	85.65420649269228	1.8956778226304323	2.431497168546102	0.4543040101856958	-4.725592422161382E-4
335	0.01	1.0	1.0	6.0	1.0	4.0	2.0	0.1	true	0.9	0.0	true	1.0	1.0	0.0010	1.0E-4	2.0	5.0	1.0	ContinuousCorrelated	Kinesis	true	0.0	1.0	PoissonProcess	1000	0	1	land1887.csv	0	2039848231	true	500	0.5	0	5.0	1.0	0.01	1.0	false	0.0	0.17098385658736534	5.9359269342259315E-6	1530.5498927080096	60.86178459709393	1.5311477951025392	2.2929453328373026	0.4966766751274102	0.001001490932964776
336	0.01	1.0	1.0	6.0	1.0	4.0	2.0	0.1	true	0.9	0.0	true	1.0	1.0	0.0010	1.0E-4	2.0	5.0	1.0	ContinuousCorrelated	Kinesis	true	0.0	1.0	PoissonProcess	1000	0	1	land1938.csv	0	2039851404	true	500	0.5	0	5.0	1.0	0.01	1.0	false	0.0	0.27519436766064864	5.021687643345208E-5	1715.080134162141	92.00370247836238	1.7156793020919963	2.3967412606895477	0.5012167446930373	-0.0017690891820568366
337	0.01	1.0	1.0	6.0	1.0	4.0	2.0	0.1	true	0.9	0.0	true	1.0	1.0	0.0010	1.0E-4	2.0	5.0	1.0	ContinuousCorrelated	Kinesis	true	0.0	1.0	PoissonProcess	1000	0	1	land1940.csv	0	2039854248	true	500	0.5	0	5.0	1.0	0.01	1.0	false	0.0	0.3019987375261814	2.6744200635597183E-5	1148.6341788526731	38.94830954357455	1.14920893593266	2.2217831575411804	0.4932187391551737	-0.0051959174792116074
338	0.01	1.0	1.0	6.0	1.0	4.0	2.0	0.1	true	0.9	0.0	true	1.0	1.0	0.0010	1.0E-4	2.0	5.0	1.0	ContinuousCorrelated	Kinesis	true	0.0	1.0	PoissonProcess	1000	0	1	land1943.csv	0	2039857230	true	500	0.5	0	5.0	1.0	0.01	1.0	false	0.0	0.18479493791901663	1.0022644327468546E-5	1305.2124460531538	70.85185731680934	1.3058118314355853	2.1367144808216545	0.504292772794013	-9.85149054669122E-4
339	0.01	1.0	1.0	6.0	1.0	4.0	2.0	0.1	true	0.9	0.0	true	1.0	1.0	0.0010	1.0E-4	2.0	5.0	1.0	ContinuousCorrelated	Kinesis	true	0.0	1.0	PoissonProcess	1000	0	1	land2002.csv	0	2039860396	true	500	0.5	0	5.0	1.0	0.01	1.0	false	0.0	0.6375909184318872	1.3827691943468478E-4	1683.7815516550702	65.79139260812157	1.684381387079078	2.342290543254898	0.5228515051580378	0.0037238228178288614
340	0.01	1.0	1.0	6.0	1.0	4.0	2.0	0.1	true	0.9	0.0	true	1.0	1.0	0.0010	1.0E-4	2.0	5.0	1.0	ContinuousCorrelated	Kinesis	true	0.0	1.0	PoissonProcess	1000	0	1	land2004.csv	0	2039863233	true	500	0.5	0	5.0	1.0	0.01	1.0	false	0.0	0.3460531829288564	9.689890305524013E-5	1981.8719732911875	196.4765764408348	1.9824610376418128	2.420206650205794	0.4901113567138397	-0.0012757016261147188
341	0.01	1.0	1.0	6.0	1.0	4.0	2.0	0.1	true	0.9	0.0	true	1.0	1.0	0.0010	1.0E-4	2.0	5.0	1.0	ContinuousCorrelated	Kinesis	true	0.0	1.0	PoissonProcess	1000	0	1	land2007.csv	0	2039865930	true	500	0.5	0	5.0	1.0	0.01	1.0	false	0.0	0.1399013483150406	8.202197276154543E-6	1717.0668206837775	60.30363934073754	1.7176393736859596	2.292935017757025	0.4883690074964642	0.001071544133674688
342	0.01	1.0	1.0	6.0	1.0	4.0	2.0	0.1	true	0.9	0.0	true	1.0	1.0	0.0010	1.0E-4	2.0	5.0	1.0	ContinuousCorrelated	Kinesis	true	0.0	1.0	PoissonProcess	1000	0	1	land2058.csv	0	2039869121	true	500	0.5	0	5.0	1.0	0.01	1.0	false	0.0	0.3531430790054088	5.909397862846246E-5	1508.4924353725519	75.4334798305584	1.5090877789563901	2.304706808911595	0.5001728330549468	-0.002054047344535728
343	0.01	1.0	1.0	6.0	1.0	4.0	2.0	0.1	true	0.9	0.0	true	1.0	1.0	0.0010	1.0E-4	2.0	5.0	1.0	ContinuousCorrelated	Kinesis	true	0.0	1.0	PoissonProcess	1000	0	1	land2060.csv	0	2039871901	true	500	0.5	0	5.0	1.0	0.01	1.0	false	0.0	0.2896559086644459	2.7703400790361544E-5	1183.8464211484204	38.416866270810466	1.184439837505535	2.1586151273403766	0.5251890880465506	-0.0023103991048918295
344	0.01	1.0	1.0	6.0	1.0	4.0	2.0	0.1	true	0.9	0.0	true	1.0	1.0	0.0010	1.0E-4	2.0	5.0	1.0	ContinuousCorrelated	Kinesis	true	0.0	1.0	PoissonProcess	1000	0	1	land2063.csv	0	2039874990	true	500	0.5	0	5.0	1.0	0.01	1.0	false	0.0	0.19403625215297424	8.153009963888038E-6	1181.4430851427906	60.499838738624895	1.1820137810453528	2.0996922378500282	0.47548257978865316	0.004009093467200977
345	0.01	1.0	1.0	6.0	1.0	4.0	2.0	0.1	true	0.9	0.0	true	1.0	1.0	0.0010	1.0E-4	2.0	5.0	1.0	ContinuousCorrelated	Kinesis	true	0.0	1.0	PoissonProcess	1000	0	1	land2122.csv	0	2039878001	true	500	0.5	0	5.0	1.0	0.01	1.0	false	0.0	0.38157012702825155	1.0430564620418143E-4	1859.9025165735825	305.0758474503517	1.8605021411064697	2.333399356103764	0.5270692759002068	0.0027978885828423426
346	0.01	1.0	1.0	6.0	1.0	4.0	2.0	0.1	true	0.9	0.0	true	1.0	1.0	0.0010	1.0E-4	2.0	5.0	1.0	ContinuousCorrelated	Kinesis	true	0.0	1.0	PoissonProcess	1000	0	1	land2124.csv	0	2039880855	true	500	0.5	0	5.0	1.0	0.01	1.0	false	0.0	0.5852904532326025	7.268540092937065E-5	1413.8070541271302	49.81933982120407	1.4144065667090602	2.4132071737899694	0.5392848340509313	3.385293227179321E-4
347	0.01	1.0	1.0	6.0	1.0	4.0	2.0	0.1	true	0.9	0.0	true	1.0	1.0	0.0010	1.0E-4	2.0	5.0	1.0	ContinuousCorrelated	Kinesis	true	0.0	1.0	PoissonProcess	1000	0	1	land2127.csv	0	2039883645	true	500	0.5	0	5.0	1.0	0.01	1.0	false	0.0	0.22487511764388704	9.91352799848063E-6	1038.3656686921559	34.93552040101169	1.0389482655661115	2.239750402201154	0.5196499343096678	0.004184374239343214
348	0.01	1.0	1.0	6.0	1.0	4.0	2.0	0.1	true	0.9	0.0	true	1.0	1.0	0.0010	1.0E-4	2.0	5.0	1.0	ContinuousCorrelated	Kinesis	true	0.0	1.0	PoissonProcess	1000	0	1	land2178.csv	0	2039886681	true	500	0.5	0	5.0	1.0	0.01	1.0	false	0.0	0.2819471938217227	4.78439068090264E-5	1607.0915701196939	109.75584719353459	1.6076857734600907	2.433897414915162	0.48574452301448723	-2.575330002803164E-5
349	0.01	1.0	1.0	6.0	1.0	4.0	2.0	0.1	true	0.9	0.0	true	1.0	1.0	0.0010	1.0E-4	2.0	5.0	1.0	ContinuousCorrelated	Kinesis	true	0.0	1.0	PoissonProcess	1000	0	1	land2180.csv	0	2039889601	true	500	0.5	0	5.0	1.0	0.01	1.0	false	0.0	0.2694472174691677	2.577279905081797E-5	1184.2008558572436	334.23072141969965	1.1847995404335474	2.0490830563011775	0.5155778826538562	-1.9392979021925095E-4
350	0.01	1.0	1.0	6.0	1.0	4.0	2.0	0.1	true	0.9	0.0	true	1.0	1.0	0.0010	1.0E-4	2.0	5.0	1.0	ContinuousCorrelated	Kinesis	true	0.0	1.0	PoissonProcess	1000	0	1	land2183.csv	0	2039892702	true	500	0.5	0	5.0	1.0	0.01	1.0	false	0.0	0.2071553586666814	9.720123947286035E-6	1149.5492439055574	80.54034480992593	1.150120830561054	2.0299029534702453	0.5174702168204387	-0.0031867980591115826
351	0.01	1.0	1.0	6.0	1.0	4.0	2.0	0.1	true	0.9	0.0	true	1.0	1.0	0.0010	1.0E-4	2.0	5.0	1.0	ContinuousCorrelated	Kinesis	true	0.0	1.0	PoissonProcess	1000	0	1	land2242.csv	0	2039895992	true	500	0.5	0	5.0	1.0	0.01	1.0	false	0.0	0.5098237298141243	1.6533320714102784E-4	1949.449669265591	83.31304833207643	1.9500455525622995	2.4280584584057765	0.49591251724378216	0.002736980386387041
352	0.01	1.0	1.0	6.0	1.0	4.0	2.0	0.1	true	0.9	0.0	true	1.0	1.0	0.0010	1.0E-4	2.0	5.0	1.0	ContinuousCorrelated	Kinesis	true	0.0	1.0	PoissonProcess	1000	0	1	land2244.csv	0	2039898721	true	500	0.5	0	5.0	1.0	0.01	1.0	false	0.0	0.26194072509792743	3.531531061943436E-5	1480.0075874951983	76.87436159103709	1.480606147304358	2.2767434816514323	0.5242950239206934	-0.005595191996476486
353	0.01	1.0	1.0	6.0	1.0	4.0	2.0	0.1	true	0.9	0.0	true	1.0	1.0	0.0010	1.0E-4	2.0	5.0	1.0	ContinuousCorrelated	Kinesis	true	0.0	1.0	PoissonProcess	1000	0	1	land2247.csv	0	2039901857	true	500	0.5	0	5.0	1.0	0.01	1.0	false	0.0	0.16896352375608098	6.916477722862938E-6	1495.388762452451	61.863673031486144	1.4959887621796257	2.271935797367156	0.4856857163645349	-6.785246174609745E-4
354	0.01	1.0	1.0	6.0	1.0	4.0	2.0	0.1	true	0.9	0.0	true	1.0	1.0	0.0010	1.0E-4	2.0	5.0	1.0	ContinuousCorrelated	Kinesis	true	0.0	1.0	PoissonProcess	1000	0	1	land2298.csv	0	2039904890	true	500	0.5	0	5.0	1.0	0.01	1.0	false	0.0	0.35727249282899604	6.313347261434865E-5	1512.8143338496384	63.292073027020585	1.5134090050485756	2.264446335594688	0.503514728218117	0.001200520128314202
355	0.01	1.0	1.0	6.0	1.0	4.0	2.0	0.1	true	0.9	0.0	true	1.0	1.0	0.0010	1.0E-4	2.0	5.0	1.0	ContinuousCorrelated	Kinesis	true	0.0	1.0	PoissonProcess	1000	0	1	land2300.csv	0	2039907779	true	500	0.5	0	5.0	1.0	0.01	1.0	false	0.0	0.31344718968036467	3.0461861622065808E-5	1194.4425818488457	89.78762343411594	1.1950170221434684	2.316657038006613	0.5226071086029873	0.005062350079250445
356	0.01	1.0	1.0	6.0	1.0	4.0	2.0	0.1	true	0.9	0.0	true	1.0	1.0	0.0010	1.0E-4	2.0	5.0	1.0	ContinuousCorrelated	Kinesis	true	0.0	1.0	PoissonProcess	1000	0	1	land2303.csv	0	2039910942	true	500	0.5	0	5.0	1.0	0.01	1.0	false	0.0	0.18903462639040947	7.12799512256975E-6	1306.9191710763223	58.510220353927394	1.3075122728341697	2.201059951199986	0.528062987399544	-0.0030532483335542204
357	0.01	1.0	1.0	6.0	1.0	4.0	2.0	0.1	true	0.9	0.0	true	1.0	1.0	0.0010	1.0E-4	2.0	5.0	1.0	ContinuousCorrelated	Kinesis	true	0.0	1.0	PoissonProcess	1000	0	1	land2362.csv	0	2039914129	true	500	0.5	0	5.0	1.0	0.01	1.0	false	0.0	0.3640462353881437	5.292192955283043E-5	1405.9194428776273	61.20955332096056	1.4064905095157154	2.2426975084593996	0.5089073385575021	-0.001888231225354459
358	0.01	1.0	1.0	6.0	1.0	4.0	2.0	0.1	true	0.9	0.0	true	1.0	1.0	0.0010	1.0E-4	2.0	5.0	1.0	ContinuousCorrelated	Kinesis	true	0.0	1.0	PoissonProcess	1000	0	1	land2364.csv	0	2039917063	true	500	0.5	0	5.0	1.0	0.01	1.0	false	0.0	0.26377875284036223	5.098973840116005E-5	1738.9584149502302	83.74785711346446	1.739528468077521	2.4221302356438477	0.4878662300719392	5.107318959263249E-4
359	0.01	1.0	1.0	6.0	1.0	4.0	2.0	0.1	true	0.9	0.0	true	1.0	1.0	0.0010	1.0E-4	2.0	5.0	1.0	ContinuousCorrelated	Kinesis	true	0.0	1.0	PoissonProcess	1000	0	1	land2367.csv	0	2039919887	true	500	0.5	0	5.0	1.0	0.01	1.0	false	0.0	0.20171233129673144	7.347953753553192E-6	1191.9009505272888	124.09138483935766	1.1924805907454497	2.3784700855754712	0.5250719064380677	0.0034381785794894257
360	0.01	1.0	1.0	6.0	1.0	4.0	2.0	0.1	true	0.9	0.0	true	1.0	1.0	0.0010	1.0E-4	2.0	5.0	1.0	ContinuousCorrelated	SingleState	true	0.0	1.0	PoissonProcess	1000	0	1	land18.csv	0	2039923005	true	500	0.5	0	5.0	1.0	0.01	1.0	false	0.0	0.15205911808620773	4.221593349149854E-5	2346.4019712203144	247.47803084965844	2.346974868827846	0.0	0.0	-0.0023999536674564406
361	0.01	1.0	1.0	6.0	1.0	4.0	2.0	0.1	true	0.9	0.0	true	1.0	1.0	0.0010	1.0E-4	2.0	5.0	1.0	ContinuousCorrelated	SingleState	true	0.0	1.0	PoissonProcess	1000	0	1	land20.csv	0	2039925863	true	500	0.5	0	5.0	1.0	0.01	1.0	false	0.0	0.18191295297436713	2.5469016220520942E-5	2407.2958546080954	99.3088478430616	2.407893138843261	0.0	0.0	6.4747472705815E-4
362	0.01	1.0	1.0	6.0	1.0	4.0	2.0	0.1	true	0.9	0.0	true	1.0	1.0	0.0010	1.0E-4	2.0	5.0	1.0	ContinuousCorrelated	SingleState	true	0.0	1.0	PoissonProcess	1000	0	1	land23.csv	0	2039929007	true	500	0.5	0	5.0	1.0	0.01	1.0	false	0.0	0.1894466796950544	1.1659703918974518E-5	2605.783639236162	133.8873280362591	2.606378467965481	0.0	0.0	-0.00628995202949782
363	0.01	1.0	1.0	6.0	1.0	4.0	2.0	0.1	true	0.9	0.0	true	1.0	1.0	0.0010	1.0E-4	2.0	5.0	1.0	ContinuousCorrelated	SingleState	true	0.0	1.0	PoissonProcess	1000	0	1	land82.csv	0	2039932194	true	500	0.5	0	5.0	1.0	0.01	1.0	false	0.0	0.218333420503415	8.501061347061539E-5	2513.210992584051	401.9527263508729	2.5138106502408144	0.0	0.0	9.2348426460591E-4
364	0.01	1.0	1.0	6.0	1.0	4.0	2.0	0.1	true	0.9	0.0	true	1.0	1.0	0.0010	1.0E-4	2.0	5.0	1.0	ContinuousCorrelated	SingleState	true	0.0	1.0	PoissonProcess	1000	0	1	land84.csv	0	2039935065	true	500	0.5	0	5.0	1.0	0.01	1.0	false	0.0	0.2047116291701164	3.2812483613681616E-5	2523.8877104902176	83.29091077781051	2.524458809938489	0.0	0.0	0.0033060041090808793
365	0.01	1.0	1.0	6.0	1.0	4.0	2.0	0.1	true	0.9	0.0	true	1.0	1.0	0.0010	1.0E-4	2.0	5.0	1.0	ContinuousCorrelated	SingleState	true	0.0	1.0	PoissonProcess	1000	0	1	land87.csv	0	2039938101	true	500	0.5	0	5.0	1.0	0.01	1.0	false	0.0	0.1541779720234201	1.2905701770808029E-5	2501.563336361223	148.98338076721208	2.5021333903012155	0.0	0.0	-0.004041357366214683
366	0.01	1.0	1.0	6.0	1.0	4.0	2.0	0.1	true	0.9	0.0	true	1.0	1.0	0.0010	1.0E-4	2.0	5.0	1.0	ContinuousCorrelated	SingleState	true	0.0	1.0	PoissonProcess	1000	0	1	land138.csv	0	2039941246	true	500	0.5	0	5.0	1.0	0.01	1.0	false	0.0	0.2051514804497228	6.805320561123147E-5	2473.010743981983	107.62538314710461	2.4736036681043068	0.0	0.0	-1.8812157385850818E-4
367	0.01	1.0	1.0	6.0	1.0	4.0	2.0	0.1	true	0.9	0.0	true	1.0	1.0	0.0010	1.0E-4	2.0	5.0	1.0	ContinuousCorrelated	SingleState	true	0.0	1.0	PoissonProcess	1000	0	1	land140.csv	0	2039944134	true	500	0.5	0	5.0	1.0	0.01	1.0	false	0.0	0.20106607894824732	2.618670842939755E-5	2397.5804749304243	143.38312241857645	2.3981714658435918	0.0	0.0	0.0016096323619379906
368	0.01	1.0	1.0	6.0	1.0	4.0	2.0	0.1	true	0.9	0.0	true	1.0	1.0	0.0010	1.0E-4	2.0	5.0	1.0	ContinuousCorrelated	SingleState	true	0.0	1.0	PoissonProcess	1000	0	1	land143.csv	0	2039947250	true	500	0.5	0	5.0	1.0	0.01	1.0	false	0.0	0.1862971412886068	1.1090147452245479E-5	2540.768397298037	286.4454102277486	2.5413422500758647	0.0	0.0	0.00318321372281398
369	0.01	1.0	1.0	6.0	1.0	4.0	2.0	0.1	true	0.9	0.0	true	1.0	1.0	0.0010	1.0E-4	2.0	5.0	1.0	ContinuousCorrelated	SingleState	true	0.0	1.0	PoissonProcess	1000	0	1	land202.csv	0	2039950451	true	500	0.5	0	5.0	1.0	0.01	1.0	false	0.0	0.14705790990131284	8.048048285474934E-5	2427.8920401793407	128.64016288464586	2.4284861858100304	0.0	0.0	-0.0013192257120762279
370	0.01	1.0	1.0	6.0	1.0	4.0	2.0	0.1	true	0.9	0.0	true	1.0	1.0	0.0010	1.0E-4	2.0	5.0	1.0	ContinuousCorrelated	SingleState	true	0.0	1.0	PoissonProcess	1000	0	1	land204.csv	0	2039953266	true	500	0.5	0	5.0	1.0	0.01	1.0	false	0.0	0.175986686904283	3.49419530668433E-5	2546.151804090496	702.8422550370057	2.546749339781751	0.0	0.0	0.004397041522765678
371	0.01	1.0	1.0	6.0	1.0	4.0	2.0	0.1	true	0.9	0.0	true	1.0	1.0	0.0010	1.0E-4	2.0	5.0	1.0	ContinuousCorrelated	SingleState	true	0.0	1.0	PoissonProcess	1000	0	1	land207.csv	0	2039956273	true	500	0.5	0	5.0	1.0	0.01	1.0	false	0.0	0.1810957035589334	1.6109341675396483E-5	2454.833179579006	136.21187450031817	2.455426560083054	0.0	0.0	-0.004307159383902121
372	0.01	1.0	1.0	6.0	1.0	4.0	2.0	0.1	true	0.9	0.0	true	1.0	1.0	0.0010	1.0E-4	2.0	5.0	1.0	ContinuousCorrelated	SingleState	true	0.0	1.0	PoissonProcess	1000	0	1	land258.csv	0	2039959402	true	500	0.5	0	5.0	1.0	0.01	1.0	false	0.0	0.20275215539066557	5.8132732101349865E-5	2475.21450124279	208.8506771341086	2.475793345330723	0.0	0.0	0.0027428340232237437
373	0.01	1.0	1.0	6.0	1.0	4.0	2.0	0.1	true	0.9	0.0	true	1.0	1.0	0.0010	1.0E-4	2.0	5.0	1.0	ContinuousCorrelated	SingleState	true	0.0	1.0	PoissonProcess	1000	0	1	land260.csv	0	2039962266	true	500	0.5	0	5.0	1.0	0.01	1.0	false	0.0	0.1597337754436738	2.5627660472547178E-5	2500.1574936985853	178.37685485123268	2.500732556104408	0.0	0.0	-3.429243537053991E-4
374	0.01	1.0	1.0	6.0	1.0	4.0	2.0	0.1	true	0.9	0.0	true	1.0	1.0	0.0010	1.0E-4	2.0	5.0	1.0	ContinuousCorrelated	SingleState	true	0.0	1.0	PoissonProcess	1000	0	1	land263.csv	0	2039965382	true	500	0.5	0	5.0	1.0	0.01	1.0	false	0.0	0.1752460044753273	1.0994259026687623E-5	2491.844813824121	126.5158479781412	2.492415694889182	0.0	0.0	0.0014935820935366207
375	0.01	1.0	1.0	6.0	1.0	4.0	2.0	0.1	true	0.9	0.0	true	1.0	1.0	0.0010	1.0E-4	2.0	5.0	1.0	ContinuousCorrelated	SingleState	true	0.0	1.0	PoissonProcess	1000	0	1	land322.csv	0	2039968543	true	500	0.5	0	5.0	1.0	0.01	1.0	false	0.0	0.2901169225421333	7.405131610752506E-5	2401.5276249440135	219.24945349230592	2.402100986431238	0.0	0.0	0.0036738151454088633
376	0.01	1.0	1.0	6.0	1.0	4.0	2.0	0.1	true	0.9	0.0	true	1.0	1.0	0.0010	1.0E-4	2.0	5.0	1.0	ContinuousCorrelated	SingleState	true	0.0	1.0	PoissonProcess	1000	0	1	land324.csv	0	2039971435	true	500	0.5	0	5.0	1.0	0.01	1.0	false	0.0	0.18341666701059478	3.6982982124069035E-5	2497.9871014289156	99.40949802473523	2.498584472695584	0.0	0.0	-0.0021504433300316493
377	0.01	1.0	1.0	6.0	1.0	4.0	2.0	0.1	true	0.9	0.0	true	1.0	1.0	0.0010	1.0E-4	2.0	5.0	1.0	ContinuousCorrelated	SingleState	true	0.0	1.0	PoissonProcess	1000	0	1	land327.csv	0	2039974473	true	500	0.5	0	5.0	1.0	0.01	1.0	false	0.0	0.18661002504884963	8.575504073686903E-6	2517.393071429377	184.78210595821554	2.5179898604509123	0.0	0.0	0.001199374517980849
378	0.01	1.0	1.0	6.0	1.0	4.0	2.0	0.1	true	0.9	0.0	true	1.0	1.0	0.0010	1.0E-4	2.0	5.0	1.0	ContinuousCorrelated	SingleState	true	0.0	1.0	PoissonProcess	1000	0	1	land378.csv	0	2039977525	true	500	0.5	0	5.0	1.0	0.01	1.0	false	0.0	0.1573576238812968	5.483361557610819E-5	2421.7515447824585	124.67842916488405	2.422350538296955	0.0	0.0	-0.003209958926266238
379	0.01	1.0	1.0	6.0	1.0	4.0	2.0	0.1	true	0.9	0.0	true	1.0	1.0	0.0010	1.0E-4	2.0	5.0	1.0	ContinuousCorrelated	SingleState	true	0.0	1.0	PoissonProcess	1000	0	1	land380.csv	0	2039980412	true	500	0.5	0	5.0	1.0	0.01	1.0	false	0.0	0.16750241969617388	2.6312252272373996E-5	2496.0540330250465	196.6562666087915	2.4966451005425454	0.0	0.0	-0.0024597046901513398
380	0.01	1.0	1.0	6.0	1.0	4.0	2.0	0.1	true	0.9	0.0	true	1.0	1.0	0.0010	1.0E-4	2.0	5.0	1.0	ContinuousCorrelated	SingleState	true	0.0	1.0	PoissonProcess	1000	0	1	land383.csv	0	2039983444	true	500	0.5	0	5.0	1.0	0.01	1.0	false	0.0	0.1902628862466986	1.1343161526949058E-5	2394.442422092335	112.19478452969538	2.395041724030217	0.0	0.0	-2.3964085525429257E-4
381	0.01	1.0	1.0	6.0	1.0	4.0	2.0	0.1	true	0.9	0.0	true	1.0	1.0	0.0010	1.0E-4	2.0	5.0	1.0	ContinuousCorrelated	SingleState	true	0.0	1.0	PoissonProcess	1000	0	1	land442.csv	0	2039986686	true	500	0.5	0	5.0	1.0	0.01	1.0	false	0.0	0.13385061365169051	4.844018540671649E-5	2372.3452556231646	145.812943525462	2.3729225056189134	0.0	0.0	-1.1941466584600738E-5
382	0.01	1.0	1.0	6.0	1.0	4.0	2.0	0.1	true	0.9	0.0	true	1.0	1.0	0.0010	1.0E-4	2.0	5.0	1.0	ContinuousCorrelated	SingleState	true	0.0	1.0	PoissonProcess	1000	0	1	land444.csv	0	2039989490	true	500	0.5	0	5.0	1.0	0.01	1.0	false	0.0	0.282867287194198	5.3050559693367785E-5	2438.8104696186324	116.61565936999156	2.439389912325788	0.0	0.0	-4.273057945291633E-4
383	0.01	1.0	1.0	6.0	1.0	4.0	2.0	0.1	true	0.9	0.0	true	1.0	1.0	0.0010	1.0E-4	2.0	5.0	1.0	ContinuousCorrelated	SingleState	true	0.0	1.0	PoissonProcess	1000	0	1	land447.csv	0	2039992412	true	500	0.5	0	5.0	1.0	0.01	1.0	false	0.0	0.20560391156073546	1.4286670386735802E-5	2356.8008559257073	93.68669608919589	2.3573821803553807	0.0	0.0	-0.002259398298975395
384	0.01	1.0	1.0	6.0	1.0	4.0	2.0	0.1	true	0.9	0.0	true	1.0	1.0	0.0010	1.0E-4	2.0	5.0	1.0	ContinuousCorrelated	SingleState	true	0.0	1.0	PoissonProcess	1000	0	1	land498.csv	0	2039995587	true	500	0.5	0	5.0	1.0	0.01	1.0	false	0.0	0.22537425592547491	6.271547514526772E-5	2502.1512876977768	119.6085396357809	2.502747657960762	0.0	0.0	0.002707216081302972
385	0.01	1.0	1.0	6.0	1.0	4.0	2.0	0.1	true	0.9	0.0	true	1.0	1.0	0.0010	1.0E-4	2.0	5.0	1.0	ContinuousCorrelated	SingleState	true	0.0	1.0	PoissonProcess	1000	0	1	land500.csv	0	2039998469	true	500	0.5	0	5.0	1.0	0.01	1.0	false	0.0	0.18151563544662655	2.442580573368555E-5	2499.9910206251834	391.36140244701664	2.5005792643782208	0.0	0.0	0.0050309382975933506
386	0.01	1.0	1.0	6.0	1.0	4.0	2.0	0.1	true	0.9	0.0	true	1.0	1.0	0.0010	1.0E-4	2.0	5.0	1.0	ContinuousCorrelated	SingleState	true	0.0	1.0	PoissonProcess	1000	0	1	land503.csv	0	2040001567	true	500	0.5	0	5.0	1.0	0.01	1.0	false	0.0	0.18912430444507836	1.0084341008481885E-5	2394.6004295850844	110.14147651604033	2.395177428575467	0.0	0.0	0.003942278704056042
387	0.01	1.0	1.0	6.0	1.0	4.0	2.0	0.1	true	0.9	0.0	true	1.0	1.0	0.0010	1.0E-4	2.0	5.0	1.0	ContinuousCorrelated	SingleState	true	0.0	1.0	PoissonProcess	1000	0	1	land562.csv	0	2040004733	true	500	0.5	0	5.0	1.0	0.01	1.0	false	0.0	0.1671805271768279	8.077325863881221E-5	2353.056458361237	288.0891798436272	2.353626527655662	0.0	0.0	-0.002036696526970289
388	0.01	1.0	1.0	6.0	1.0	4.0	2.0	0.1	true	0.9	0.0	true	1.0	1.0	0.0010	1.0E-4	2.0	5.0	1.0	ContinuousCorrelated	SingleState	true	0.0	1.0	PoissonProcess	1000	0	1	land564.csv	0	2040007566	true	500	0.5	0	5.0	1.0	0.01	1.0	false	0.0	0.20447115351594278	2.422391509617812E-5	2474.6500992330543	277.04912578732046	2.4752203301713562	0.0	0.0	-0.0032352530535660283
389	0.01	1.0	1.0	6.0	1.0	4.0	2.0	0.1	true	0.9	0.0	true	1.0	1.0	0.0010	1.0E-4	2.0	5.0	1.0	ContinuousCorrelated	SingleState	true	0.0	1.0	PoissonProcess	1000	0	1	land567.csv	0	2040010717	true	500	0.5	0	5.0	1.0	0.01	1.0	false	0.0	0.19503134732618851	1.5661919573899406E-5	2508.141412209238	161.0640789273832	2.5087401060795953	0.0	0.0	0.0013412154010710483
390	0.01	1.0	1.0	6.0	1.0	4.0	2.0	0.1	true	0.9	0.0	true	1.0	1.0	0.0010	1.0E-4	2.0	5.0	1.0	ContinuousCorrelated	SingleState	true	0.0	1.0	PoissonProcess	1000	0	1	land618.csv	0	2040013879	true	500	0.5	0	5.0	1.0	0.01	1.0	false	0.0	0.1554028053715058	5.817496266072159E-5	2563.626641113379	179.17483544034076	2.564225863825503	0.0	0.0	-3.5420324883998505E-5
391	0.01	1.0	1.0	6.0	1.0	4.0	2.0	0.1	true	0.9	0.0	true	1.0	1.0	0.0010	1.0E-4	2.0	5.0	1.0	ContinuousCorrelated	SingleState	true	0.0	1.0	PoissonProcess	1000	0	1	land620.csv	0	2040016749	true	500	0.5	0	5.0	1.0	0.01	1.0	false	0.0	0.18537310181380137	3.0544562385658026E-5	2602.944587199349	1221.558505035695	2.603518483649382	0.0	0.0	0.002151733693582636
392	0.01	1.0	1.0	6.0	1.0	4.0	2.0	0.1	true	0.9	0.0	true	1.0	1.0	0.0010	1.0E-4	2.0	5.0	1.0	ContinuousCorrelated	SingleState	true	0.0	1.0	PoissonProcess	1000	0	1	land623.csv	0	2040019796	true	500	0.5	0	5.0	1.0	0.01	1.0	false	0.0	0.17716012869194783	1.0450878289963857E-5	2397.4837829760727	241.80670953655854	2.398078871952175	0.0	0.0	0.00190981103802615
393	0.01	1.0	1.0	6.0	1.0	4.0	2.0	0.1	true	0.9	0.0	true	1.0	1.0	0.0010	1.0E-4	2.0	5.0	1.0	ContinuousCorrelated	SingleState	true	0.0	1.0	PoissonProcess	1000	0	1	land682.csv	0	2040022952	true	500	0.5	0	5.0	1.0	0.01	1.0	false	0.0	0.08974840339156048	2.93800810884027E-5	2570.25907527216	121.29933062820798	2.5708404282305986	0.0	0.0	0.002850824602999494
394	0.01	1.0	1.0	6.0	1.0	4.0	2.0	0.1	true	0.9	0.0	true	1.0	1.0	0.0010	1.0E-4	2.0	5.0	1.0	ContinuousCorrelated	SingleState	true	0.0	1.0	PoissonProcess	1000	0	1	land684.csv	0	2040025803	true	500	0.5	0	5.0	1.0	0.01	1.0	false	0.0	0.13822213800312902	4.2085234869450455E-5	2461.821589081855	109.38497836297132	2.4624177025813117	0.0	0.0	0.003836794060659818
395	0.01	1.0	1.0	6.0	1.0	4.0	2.0	0.1	true	0.9	0.0	true	1.0	1.0	0.0010	1.0E-4	2.0	5.0	1.0	ContinuousCorrelated	SingleState	true	0.0	1.0	PoissonProcess	1000	0	1	land687.csv	0	2040028686	true	500	0.5	0	5.0	1.0	0.01	1.0	false	0.0	0.18184395550615706	1.0232407796297928E-5	2594.033336232841	95.39953521228415	2.5946152290083506	0.0	0.0	0.003526405130829824
396	0.01	1.0	1.0	6.0	1.0	4.0	2.0	0.1	true	0.9	0.0	true	1.0	1.0	0.0010	1.0E-4	2.0	5.0	1.0	ContinuousCorrelated	SingleState	true	0.0	1.0	PoissonProcess	1000	0	1	land738.csv	0	2040031822	true	500	0.5	0	5.0	1.0	0.01	1.0	false	0.0	0.14194595429731238	5.726856863344028E-5	2504.873400361036	177.03587552823274	2.5054695404274963	0.0	0.0	-0.0015729147252314425
397	0.01	1.0	1.0	6.0	1.0	4.0	2.0	0.1	true	0.9	0.0	true	1.0	1.0	0.0010	1.0E-4	2.0	5.0	1.0	ContinuousCorrelated	SingleState	true	0.0	1.0	PoissonProcess	1000	0	1	land740.csv	0	2040034584	true	500	0.5	0	5.0	1.0	0.01	1.0	false	0.0	0.16308006529025476	2.3344736975264847E-5	2453.9856649820836	90.87537825301732	2.454578666224403	0.0	0.0	-0.002442909259493251
398	0.01	1.0	1.0	6.0	1.0	4.0	2.0	0.1	true	0.9	0.0	true	1.0	1.0	0.0010	1.0E-4	2.0	5.0	1.0	ContinuousCorrelated	SingleState	true	0.0	1.0	PoissonProcess	1000	0	1	land743.csv	0	2040037633	true	500	0.5	0	5.0	1.0	0.01	1.0	false	0.0	0.1877807496015657	1.1091008635936909E-5	2401.4240017708507	102.67895093730306	2.4020167172479288	0.0	0.0	7.393280353088762E-5
399	0.01	1.0	1.0	6.0	1.0	4.0	2.0	0.1	true	0.9	0.0	true	1.0	1.0	0.0010	1.0E-4	2.0	5.0	1.0	ContinuousCorrelated	SingleState	true	0.0	1.0	PoissonProcess	1000	0	1	land802.csv	0	2040040832	true	500	0.5	0	5.0	1.0	0.01	1.0	false	0.0	0.23370544109708768	7.705865962654714E-5	2519.6561415360766	101.16561761678176	2.5202261917227453	0.0	0.0	-0.002459592607795168
400	0.01	1.0	1.0	6.0	1.0	4.0	2.0	0.1	true	0.9	0.0	true	1.0	1.0	0.0010	1.0E-4	2.0	5.0	1.0	ContinuousCorrelated	SingleState	true	0.0	1.0	PoissonProcess	1000	0	1	land804.csv	0	2040043678	true	500	0.5	0	5.0	1.0	0.01	1.0	false	0.0	0.18439188878406573	5.15186054383914E-5	2376.1185409831523	93.33600862155468	2.3766886916841004	0.0	0.0	9.646496876773469E-4
401	0.01	1.0	1.0	6.0	1.0	4.0	2.0	0.1	true	0.9	0.0	true	1.0	1.0	0.0010	1.0E-4	2.0	5.0	1.0	ContinuousCorrelated	SingleState	true	0.0	1.0	PoissonProcess	1000	0	1	land807.csv	0	2040046567	true	500	0.5	0	5.0	1.0	0.01	1.0	false	0.0	0.19144139278694255	1.61136723602521E-5	2468.5632492089167	128.2689697379646	2.469142523623671	0.0	0.0	0.003093182296246976
402	0.01	1.0	1.0	6.0	1.0	4.0	2.0	0.1	true	0.9	0.0	true	1.0	1.0	0.0010	1.0E-4	2.0	5.0	1.0	ContinuousCorrelated	SingleState	true	0.0	1.0	PoissonProcess	1000	0	1	land858.csv	0	2040049761	true	500	0.5	0	5.0	1.0	0.01	1.0	false	0.0	0.17168335745136099	5.740681242720627E-5	2441.008370668809	287.90218524963694	2.441578587678118	0.0	0.0	-0.0015908515865441881
403	0.01	1.0	1.0	6.0	1.0	4.0	2.0	0.1	true	0.9	0.0	true	1.0	1.0	0.0010	1.0E-4	2.0	5.0	1.0	ContinuousCorrelated	SingleState	true	0.0	1.0	PoissonProcess	1000	0	1	land860.csv	0	2040052637	true	500	0.5	0	5.0	1.0	0.01	1.0	false	0.0	0.19299234444680383	2.6834292792211738E-5	2380.187733429973	125.03464748058433	2.380769800480654	0.0	0.0	-0.0012945422879473921
404	0.01	1.0	1.0	6.0	1.0	4.0	2.0	0.1	true	0.9	0.0	true	1.0	1.0	0.0010	1.0E-4	2.0	5.0	1.0	ContinuousCorrelated	SingleState	true	0.0	1.0	PoissonProcess	1000	0	1	land863.csv	0	2040055804	true	500	0.5	0	5.0	1.0	0.01	1.0	false	0.0	0.1640151306215541	1.0768137773850848E-5	2555.2217060322823	118.10000130396662	2.5557919484539786	0.0	0.0	-4.3038823288928606E-4
405	0.01	1.0	1.0	6.0	1.0	4.0	2.0	0.1	true	0.9	0.0	true	1.0	1.0	0.0010	1.0E-4	2.0	5.0	1.0	ContinuousCorrelated	SingleState	true	0.0	1.0	PoissonProcess	1000	0	1	land922.csv	0	2040058966	true	500	0.5	0	5.0	1.0	0.01	1.0	false	0.0	0.23909085166707328	6.612949907993994E-5	2387.6631103813734	2370.994865518932	2.388239520508739	0.0	0.0	6.681622292975675E-5
406	0.01	1.0	1.0	6.0	1.0	4.0	2.0	0.1	true	0.9	0.0	true	1.0	1.0	0.0010	1.0E-4	2.0	5.0	1.0	ContinuousCorrelated	SingleState	true	0.0	1.0	PoissonProcess	1000	0	1	land924.csv	0	2040061830	true	500	0.5	0	5.0	1.0	0.01	1.0	false	0.0	0.19175458996923803	2.2389446398943142E-5	2363.1425051379715	267.9421316856291	2.3637135272142182	0.0	0.0	-0.008081609522070942
407	0.01	1.0	1.0	6.0	1.0	4.0	2.0	0.1	true	0.9	0.0	true	1.0	1.0	0.0010	1.0E-4	2.0	5.0	1.0	ContinuousCorrelated	SingleState	true	0.0	1.0	PoissonProcess	1000	0	1	land927.csv	0	2040064945	true	500	0.5	0	5.0	1.0	0.01	1.0	false	0.0	0.165912406360396	1.5925601060730763E-5	2527.569418336478	140.88954840574715	2.5281604170950156	0.0	0.0	0.0012415554525718017
408	0.01	1.0	1.0	6.0	1.0	4.0	2.0	0.1	true	0.9	0.0	true	1.0	1.0	0.0010	1.0E-4	2.0	5.0	1.0	ContinuousCorrelated	SingleState	true	0.0	1.0	PoissonProcess	1000	0	1	land978.csv	0	2040068005	true	500	0.5	0	5.0	1.0	0.01	1.0	false	0.0	0.19017879289782252	5.257927975178573E-5	2454.859861886186	132.1220337132598	2.4554597778154563	0.0	0.0	-6.538144531941507E-5
409	0.01	1.0	1.0	6.0	1.0	4.0	2.0	0.1	true	0.9	0.0	true	1.0	1.0	0.0010	1.0E-4	2.0	5.0	1.0	ContinuousCorrelated	SingleState	true	0.0	1.0	PoissonProcess	1000	0	1	land980.csv	0	2040070852	true	500	0.5	0	5.0	1.0	0.01	1.0	false	0.0	0.1956372193340138	2.299958341874046E-5	2362.7682282508504	103.11876630903109	2.3633518487030716	0.0	0.0	0.0011919238147593454
410	0.01	1.0	1.0	6.0	1.0	4.0	2.0	0.1	true	0.9	0.0	true	1.0	1.0	0.0010	1.0E-4	2.0	5.0	1.0	ContinuousCorrelated	SingleState	true	0.0	1.0	PoissonProcess	1000	0	1	land983.csv	0	2040074051	true	500	0.5	0	5.0	1.0	0.01	1.0	false	0.0	0.18224036176413938	1.1578241924091112E-5	2465.6158612455883	112.25363837560731	2.466191475607987	0.0	0.0	0.001719880735165274
411	0.01	1.0	1.0	6.0	1.0	4.0	2.0	0.1	true	0.9	0.0	true	1.0	1.0	0.0010	1.0E-4	2.0	5.0	1.0	ContinuousCorrelated	SingleState	true	0.0	1.0	PoissonProcess	1000	0	1	land1042.csv	0	2040077293	true	500	0.5	0	5.0	1.0	0.01	1.0	false	0.0	0.14554533461465158	5.66716826838722E-5	2397.114711696395	174.7855418521676	2.397685433181066	0.0	0.0	0.0011007167267698301
412	0.01	1.0	1.0	6.0	1.0	4.0	2.0	0.1	true	0.9	0.0	true	1.0	1.0	0.0010	1.0E-4	2.0	5.0	1.0	ContinuousCorrelated	SingleState	true	0.0	1.0	PoissonProcess	1000	0	1	land1044.csv	0	2040080194	true	500	0.5	0	5.0	1.0	0.01	1.0	false	0.0	0.23415481388075818	3.9419380530512276E-5	2404.6725561474163	107.12608912773017	2.4052488777117236	0.0	0.0	-3.180600106131787E-4
413	0.01	1.0	1.0	6.0	1.0	4.0	2.0	0.1	true	0.9	0.0	true	1.0	1.0	0.0010	1.0E-4	2.0	5.0	1.0	ContinuousCorrelated	SingleState	true	0.0	1.0	PoissonProcess	1000	0	1	land1047.csv	0	2040083160	true	500	0.5	0	5.0	1.0	0.01	1.0	false	0.0	0.18116977232202766	1.2020354912320338E-5	2602.293479669565	408.6558038919575	2.60288316315478	0.0	0.0	0.0017084430769595694
414	0.01	1.0	1.0	6.0	1.0	4.0	2.0	0.1	true	0.9	0.0	true	1.0	1.0	0.0010	1.0E-4	2.0	5.0	1.0	ContinuousCorrelated	SingleState	true	0.0	1.0	PoissonProcess	1000	0	1	land1098.csv	0	2040086333	true	500	0.5	0	5.0	1.0	0.01	1.0	false	0.0	0.2116525817040136	5.610341583388903E-5	2445.259090797674	124.46201209498744	2.4458393679908084	0.0	0.0	-0.0019087988902884306
415	0.01	1.0	1.0	6.0	1.0	4.0	2.0	0.1	true	0.9	0.0	true	1.0	1.0	0.0010	1.0E-4	2.0	5.0	1.0	ContinuousCorrelated	SingleState	true	0.0	1.0	PoissonProcess	1000	0	1	land1100.csv	0	2040089225	true	500	0.5	0	5.0	1.0	0.01	1.0	false	0.0	0.14640256576661648	2.86105083981427E-5	2299.639202608535	184.48180514139895	2.3002312484641694	0.0	0.0	-8.218740015595945E-4
416	0.01	1.0	1.0	6.0	1.0	4.0	2.0	0.1	true	0.9	0.0	true	1.0	1.0	0.0010	1.0E-4	2.0	5.0	1.0	ContinuousCorrelated	SingleState	true	0.0	1.0	PoissonProcess	1000	0	1	land1103.csv	0	2040092323	true	500	0.5	0	5.0	1.0	0.01	1.0	false	0.0	0.18239022928947815	1.2375038716520849E-5	2469.117162148314	85.42306068672801	2.46971408694869	0.0	0.0	-0.0014147555281418729
417	0.01	1.0	1.0	6.0	1.0	4.0	2.0	0.1	true	0.9	0.0	true	1.0	1.0	0.0010	1.0E-4	2.0	5.0	1.0	ContinuousCorrelated	SingleState	true	0.0	1.0	PoissonProcess	1000	0	1	land1162.csv	0	2040095520	true	500	0.5	0	5.0	1.0	0.01	1.0	false	0.0	0.16899536273891544	6.394513580330224E-5	2452.0978939140637	910.7444484397325	2.45269572165163	0.0	0.0	1.6609774865792732E-4
418	0.01	1.0	1.0	6.0	1.0	4.0	2.0	0.1	true	0.9	0.0	true	1.0	1.0	0.0010	1.0E-4	2.0	5.0	1.0	ContinuousCorrelated	SingleState	true	0.0	1.0	PoissonProcess	1000	0	1	land1164.csv	0	2040098402	true	500	0.5	0	5.0	1.0	0.01	1.0	false	0.0	0.18479285166218895	5.222132869669803E-5	2416.7617447802154	128.66295121174971	2.4173323992646436	0.0	0.0	-0.004452761739970095
419	0.01	1.0	1.0	6.0	1.0	4.0	2.0	0.1	true	0.9	0.0	true	1.0	1.0	0.0010	1.0E-4	2.0	5.0	1.0	ContinuousCorrelated	SingleState	true	0.0	1.0	PoissonProcess	1000	0	1	land1167.csv	0	2040101299	true	500	0.5	0	5.0	1.0	0.01	1.0	false	0.0	0.16218432052057896	1.2901082617581473E-5	2575.3519691110273	145.74925671512156	2.575922008434249	0.0	0.0	-0.0036533781026515545
420	0.01	1.0	1.0	6.0	1.0	4.0	2.0	0.1	true	0.9	0.0	true	1.0	1.0	0.0010	1.0E-4	2.0	5.0	1.0	ContinuousCorrelated	SingleState	true	0.0	1.0	PoissonProcess	1000	0	1	land1218.csv	0	2040104444	true	500	0.5	0	5.0	1.0	0.01	1.0	false	0.0	0.18103195629930127	5.953935899497981E-5	2548.2864165739093	94.98243425310272	2.5488785883720633	0.0	0.0	-0.0022291502744364723
421	0.01	1.0	1.0	6.0	1.0	4.0	2.0	0.1	true	0.9	0.0	true	1.0	1.0	0.0010	1.0E-4	2.0	5.0	1.0	ContinuousCorrelated	SingleState	true	0.0	1.0	PoissonProcess	1000	0	1	land1220.csv	0	2040107301	true	500	0.5	0	5.0	1.0	0.01	1.0	false	0.0	0.17927724693049324	2.3715540135862143E-5	2527.39171272247	102.92236420828868	2.5279909285993516	0.0	0.0	9.66082631487705E-4
422	0.01	1.0	1.0	6.0	1.0	4.0	2.0	0.1	true	0.9	0.0	true	1.0	1.0	0.0010	1.0E-4	2.0	5.0	1.0	ContinuousCorrelated	SingleState	true	0.0	1.0	PoissonProcess	1000	0	1	land1223.csv	0	2040110527	true	500	0.5	0	5.0	1.0	0.01	1.0	false	0.0	0.1847542349571979	1.1524199573344198E-5	2376.6470524375004	84.89272000069053	2.3772403575985623	0.0	0.0	0.002144608409623008
423	0.01	1.0	1.0	6.0	1.0	4.0	2.0	0.1	true	0.9	0.0	true	1.0	1.0	0.0010	1.0E-4	2.0	5.0	1.0	ContinuousCorrelated	SingleState	true	0.0	1.0	PoissonProcess	1000	0	1	land1282.csv	0	2040113798	true	500	0.5	0	5.0	1.0	0.01	1.0	false	0.0	0.14156336234148267	3.7518936386780054E-5	2476.612679969481	90.70021803010981	2.4771893543950996	0.0	0.0	0.0012396340432818524
424	0.01	1.0	1.0	6.0	1.0	4.0	2.0	0.1	true	0.9	0.0	true	1.0	1.0	0.0010	1.0E-4	2.0	5.0	1.0	ContinuousCorrelated	SingleState	true	0.0	1.0	PoissonProcess	1000	0	1	land1284.csv	0	2040116847	true	500	0.5	0	5.0	1.0	0.01	1.0	false	0.0	0.15561766106824046	1.832946735492981E-5	2517.1509317521636	121.33196577094243	2.5177417839993335	0.0	0.0	-5.575303335695134E-4
425	0.01	1.0	1.0	6.0	1.0	4.0	2.0	0.1	true	0.9	0.0	true	1.0	1.0	0.0010	1.0E-4	2.0	5.0	1.0	ContinuousCorrelated	SingleState	true	0.0	1.0	PoissonProcess	1000	0	1	land1287.csv	0	2040119939	true	500	0.5	0	5.0	1.0	0.01	1.0	false	0.0	0.18408999585104927	1.6307869459976558E-5	2569.8573447665326	107.84662779926568	2.5704516386801584	0.0	0.0	-5.430475461850944E-4
426	0.01	1.0	1.0	6.0	1.0	4.0	2.0	0.1	true	0.9	0.0	true	1.0	1.0	0.0010	1.0E-4	2.0	5.0	1.0	ContinuousCorrelated	SingleState	true	0.0	1.0	PoissonProcess	1000	0	1	land1338.csv	0	2040123145	true	500	0.5	0	5.0	1.0	0.01	1.0	false	0.0	0.14576829485717357	5.059200156773808E-5	2348.367805173494	73.56320025942368	2.3489575543775287	0.0	0.0	-2.8016450419928563E-4
427	0.01	1.0	1.0	6.0	1.0	4.0	2.0	0.1	true	0.9	0.0	true	1.0	1.0	0.0010	1.0E-4	2.0	5.0	1.0	ContinuousCorrelated	SingleState	true	0.0	1.0	PoissonProcess	1000	0	1	land1340.csv	0	2040126054	true	500	0.5	0	5.0	1.0	0.01	1.0	false	0.0	0.194834751403862	2.594613469149361E-5	2221.018336655655	92.17488706280031	2.2215907262568346	0.0	0.0	-2.644460295585699E-4
428	0.01	1.0	1.0	6.0	1.0	4.0	2.0	0.1	true	0.9	0.0	true	1.0	1.0	0.0010	1.0E-4	2.0	5.0	1.0	ContinuousCorrelated	SingleState	true	0.0	1.0	PoissonProcess	1000	0	1	land1343.csv	0	2040129331	true	500	0.5	0	5.0	1.0	0.01	1.0	false	0.0	0.1897883966498152	1.122322782276988E-5	2428.709794668259	83.28039469393416	2.429284034902015	0.0	0.0	-0.0013973503191044084
429	0.01	1.0	1.0	6.0	1.0	4.0	2.0	0.1	true	0.9	0.0	true	1.0	1.0	0.0010	1.0E-4	2.0	5.0	1.0	ContinuousCorrelated	SingleState	true	0.0	1.0	PoissonProcess	1000	0	1	land1402.csv	0	2040132492	true	500	0.5	0	5.0	1.0	0.01	1.0	false	0.0	0.07679888080942954	5.949165503930238E-5	2378.5112795907726	78.1010292379562	2.3790852123772406	0.0	0.0	0.00496348797269148
430	0.01	1.0	1.0	6.0	1.0	4.0	2.0	0.1	true	0.9	0.0	true	1.0	1.0	0.0010	1.0E-4	2.0	5.0	1.0	ContinuousCorrelated	SingleState	true	0.0	1.0	PoissonProcess	1000	0	1	land1404.csv	0	2040135278	true	500	0.5	0	5.0	1.0	0.01	1.0	false	0.0	0.2204002037740171	4.0000674704728736E-5	2402.6299828186284	109.27313081862945	2.4032002419626313	0.0	0.0	-0.0029163175702997327
431	0.01	1.0	1.0	6.0	1.0	4.0	2.0	0.1	true	0.9	0.0	true	1.0	1.0	0.0010	1.0E-4	2.0	5.0	1.0	ContinuousCorrelated	SingleState	true	0.0	1.0	PoissonProcess	1000	0	1	land1407.csv	0	2040138317	true	500	0.5	0	5.0	1.0	0.01	1.0	false	0.0	0.19553050545264733	1.3082995128169854E-5	2625.0363033643243	311.16132725904265	2.6256200890676973	0.0	0.0	-6.181476264337326E-4
432	0.01	1.0	1.0	6.0	1.0	4.0	2.0	0.1	true	0.9	0.0	true	1.0	1.0	0.0010	1.0E-4	2.0	5.0	1.0	ContinuousCorrelated	SingleState	true	0.0	1.0	PoissonProcess	1000	0	1	land1458.csv	0	2040141511	true	500	0.5	0	5.0	1.0	0.01	1.0	false	0.0	0.13907163294520905	4.377662510141113E-5	2419.8464730582436	90.96448798251176	2.4204209595587916	0.0	0.0	-0.0034584855254636993
433	0.01	1.0	1.0	6.0	1.0	4.0	2.0	0.1	true	0.9	0.0	true	1.0	1.0	0.0010	1.0E-4	2.0	5.0	1.0	ContinuousCorrelated	SingleState	true	0.0	1.0	PoissonProcess	1000	0	1	land1460.csv	0	2040144418	true	500	0.5	0	5.0	1.0	0.01	1.0	false	0.0	0.18500048854976306	2.6656838666971797E-5	2449.5115130547774	128.86402469590763	2.4500819914110217	0.0	0.0	6.138978830411242E-5
434	0.01	1.0	1.0	6.0	1.0	4.0	2.0	0.1	true	0.9	0.0	true	1.0	1.0	0.0010	1.0E-4	2.0	5.0	1.0	ContinuousCorrelated	SingleState	true	0.0	1.0	PoissonProcess	1000	0	1	land1463.csv	0	2040147589	true	500	0.5	0	5.0	1.0	0.01	1.0	false	0.0	0.17342923957521558	1.0134275460053142E-5	2360.2983355348674	135.46488821003976	2.360868622935495	0.0	0.0	0.005038907141715197
435	0.01	1.0	1.0	6.0	1.0	4.0	2.0	0.1	true	0.9	0.0	true	1.0	1.0	0.0010	1.0E-4	2.0	5.0	1.0	ContinuousCorrelated	SingleState	true	0.0	1.0	PoissonProcess	1000	0	1	land1522.csv	0	2040150795	true	500	0.5	0	5.0	1.0	0.01	1.0	false	0.0	0.16711030397915788	4.9662599595445044E-5	2458.565321914848	103.54701029249465	2.459155073901814	0.0	0.0	-2.0157347904768407E-4
436	0.01	1.0	1.0	6.0	1.0	4.0	2.0	0.1	true	0.9	0.0	true	1.0	1.0	0.0010	1.0E-4	2.0	5.0	1.0	ContinuousCorrelated	SingleState	true	0.0	1.0	PoissonProcess	1000	0	1	land1524.csv	0	2040153647	true	500	0.5	0	5.0	1.0	0.01	1.0	false	0.0	0.1820857846716661	2.161821166205051E-5	2460.326356137363	165.5443768823718	2.4609178226436623	0.0	0.0	8.195213125006559E-4
437	0.01	1.0	1.0	6.0	1.0	4.0	2.0	0.1	true	0.9	0.0	true	1.0	1.0	0.0010	1.0E-4	2.0	5.0	1.0	ContinuousCorrelated	SingleState	true	0.0	1.0	PoissonProcess	1000	0	1	land1527.csv	0	2040156759	true	500	0.5	0	5.0	1.0	0.01	1.0	false	0.0	0.1791675472296055	1.6568823159218585E-5	2399.7317188915254	98.7205330337372	2.4003255551721914	0.0	0.0	-0.006765635480870361
438	0.01	1.0	1.0	6.0	1.0	4.0	2.0	0.1	true	0.9	0.0	true	1.0	1.0	0.0010	1.0E-4	2.0	5.0	1.0	ContinuousCorrelated	SingleState	true	0.0	1.0	PoissonProcess	1000	0	1	land1578.csv	0	2040159889	true	500	0.5	0	5.0	1.0	0.01	1.0	false	0.0	0.17545594458156216	4.751879034042538E-5	2499.3931060159107	104.17727089283363	2.4999819203656446	0.0	0.0	-0.004355661812349356
439	0.01	1.0	1.0	6.0	1.0	4.0	2.0	0.1	true	0.9	0.0	true	1.0	1.0	0.0010	1.0E-4	2.0	5.0	1.0	ContinuousCorrelated	SingleState	true	0.0	1.0	PoissonProcess	1000	0	1	land1580.csv	0	2040162750	true	500	0.5	0	5.0	1.0	0.01	1.0	false	0.0	0.19935790044767474	3.024449095033602E-5	2577.4890755847982	216.533709635198	2.5780593551842843	0.0	0.0	-0.0014358250368753957
440	0.01	1.0	1.0	6.0	1.0	4.0	2.0	0.1	true	0.9	0.0	true	1.0	1.0	0.0010	1.0E-4	2.0	5.0	1.0	ContinuousCorrelated	SingleState	true	0.0	1.0	PoissonProcess	1000	0	1	land1583.csv	0	2040165842	true	500	0.5	0	5.0	1.0	0.01	1.0	false	0.0	0.18819163998730426	1.087155399821709E-5	2474.0399901279256	118.88747201403963	2.4746178741386142	0.0	0.0	2.690141007782541E-4
441	0.01	1.0	1.0	6.0	1.0	4.0	2.0	0.1	true	0.9	0.0	true	1.0	1.0	0.0010	1.0E-4	2.0	5.0	1.0	ContinuousCorrelated	SingleState	true	0.0	1.0	PoissonProcess	1000	0	1	land1642.csv	0	2040168983	true	500	0.5	0	5.0	1.0	0.01	1.0	false	0.0	0.20502412592563724	9.848570689841834E-5	2583.4109086016683	235.97273459476048	2.584010527032896	0.0	0.0	-5.221200389193635E-4
442	0.01	1.0	1.0	6.0	1.0	4.0	2.0	0.1	true	0.9	0.0	true	1.0	1.0	0.0010	1.0E-4	2.0	5.0	1.0	ContinuousCorrelated	SingleState	true	0.0	1.0	PoissonProcess	1000	0	1	land1644.csv	0	2040171798	true	500	0.5	0	5.0	1.0	0.01	1.0	false	0.0	0.1687144615873416	4.030790974772289E-5	2448.3277370148344	340.30969271563725	2.4489017036560194	0.0	0.0	0.0027563043625206335
443	0.01	1.0	1.0	6.0	1.0	4.0	2.0	0.1	true	0.9	0.0	true	1.0	1.0	0.0010	1.0E-4	2.0	5.0	1.0	ContinuousCorrelated	SingleState	true	0.0	1.0	PoissonProcess	1000	0	1	land1647.csv	0	2040174811	true	500	0.5	0	5.0	1.0	0.01	1.0	false	0.0	0.1855621600677351	8.423093337474879E-6	2454.1517186815727	132.7288835241973	2.454747070860337	0.0	0.0	-0.004195881052166751
444	0.01	1.0	1.0	6.0	1.0	4.0	2.0	0.1	true	0.9	0.0	true	1.0	1.0	0.0010	1.0E-4	2.0	5.0	1.0	ContinuousCorrelated	SingleState	true	0.0	1.0	PoissonProcess	1000	0	1	land1698.csv	0	2040177966	true	500	0.5	0	5.0	1.0	0.01	1.0	false	0.0	0.2469533959075497	6.832642304415165E-5	2403.6950837255345	198.4558051798457	2.4042651691689096	0.0	0.0	3.730241051740924E-4
445	0.01	1.0	1.0	6.0	1.0	4.0	2.0	0.1	true	0.9	0.0	true	1.0	1.0	0.0010	1.0E-4	2.0	5.0	1.0	ContinuousCorrelated	SingleState	true	0.0	1.0	PoissonProcess	1000	0	1	land1700.csv	0	2040180842	true	500	0.5	0	5.0	1.0	0.01	1.0	false	0.0	0.13543437526391924	2.3841650119112188E-5	2290.230752746755	267.151150141848	2.290811119512882	0.0	0.0	0.008800847689216566
446	0.01	1.0	1.0	6.0	1.0	4.0	2.0	0.1	true	0.9	0.0	true	1.0	1.0	0.0010	1.0E-4	2.0	5.0	1.0	ContinuousCorrelated	SingleState	true	0.0	1.0	PoissonProcess	1000	0	1	land1703.csv	0	2040183985	true	500	0.5	0	5.0	1.0	0.01	1.0	false	0.0	0.19578177286238804	1.1014425497694916E-5	2509.922473624382	95.14035863293972	2.510515063860939	0.0	0.0	-8.964904285411144E-5
447	0.01	1.0	1.0	6.0	1.0	4.0	2.0	0.1	true	0.9	0.0	true	1.0	1.0	0.0010	1.0E-4	2.0	5.0	1.0	ContinuousCorrelated	SingleState	true	0.0	1.0	PoissonProcess	1000	0	1	land1762.csv	0	2040187241	true	500	0.5	0	5.0	1.0	0.01	1.0	false	0.0	0.157003508626765	5.634226517270937E-5	2492.803595115105	136.97086223168864	2.4933982067165017	0.0	0.0	-0.004474501273394269
448	0.01	1.0	1.0	6.0	1.0	4.0	2.0	0.1	true	0.9	0.0	true	1.0	1.0	0.0010	1.0E-4	2.0	5.0	1.0	ContinuousCorrelated	SingleState	true	0.0	1.0	PoissonProcess	1000	0	1	land1764.csv	0	2040190061	true	500	0.5	0	5.0	1.0	0.01	1.0	false	0.0	0.19737121262405924	3.1006369086654917E-5	2563.102772761652	383.94311828850414	2.563693849315587	0.0	0.0	-0.003213089783402151
449	0.01	1.0	1.0	6.0	1.0	4.0	2.0	0.1	true	0.9	0.0	true	1.0	1.0	0.0010	1.0E-4	2.0	5.0	1.0	ContinuousCorrelated	SingleState	true	0.0	1.0	PoissonProcess	1000	0	1	land1767.csv	0	2040193099	true	500	0.5	0	5.0	1.0	0.01	1.0	false	0.0	0.12197029331789136	1.587806702897425E-5	2486.268872262466	329.67288603188274	2.4868433771972125	0.0	0.0	-7.795050510218996E-4
450	0.01	1.0	1.0	6.0	1.0	4.0	2.0	0.1	true	0.9	0.0	true	1.0	1.0	0.0010	1.0E-4	2.0	5.0	1.0	ContinuousCorrelated	SingleState	true	0.0	1.0	PoissonProcess	1000	0	1	land1818.csv	0	2040196196	true	500	0.5	0	5.0	1.0	0.01	1.0	false	0.0	0.17286146114284678	5.102289093139999E-5	2537.194746013487	155.63355813968155	2.537771464409495	0.0	0.0	6.222636433124962E-4
451	0.01	1.0	1.0	6.0	1.0	4.0	2.0	0.1	true	0.9	0.0	true	1.0	1.0	0.0010	1.0E-4	2.0	5.0	1.0	ContinuousCorrelated	SingleState	true	0.0	1.0	PoissonProcess	1000	0	1	land1820.csv	0	2040199104	true	500	0.5	0	5.0	1.0	0.01	1.0	false	0.0	0.18855046455475286	2.4023135338859525E-5	2351.376665234409	184.34654468421283	2.3519682265937103	0.0	0.0	-0.001066686030104689
452	0.01	1.0	1.0	6.0	1.0	4.0	2.0	0.1	true	0.9	0.0	true	1.0	1.0	0.0010	1.0E-4	2.0	5.0	1.0	ContinuousCorrelated	SingleState	true	0.0	1.0	PoissonProcess	1000	0	1	land1823.csv	0	2040202282	true	500	0.5	0	5.0	1.0	0.01	1.0	false	0.0	0.17481217896553194	1.0522571846538157E-5	2378.7225247354595	763.8455794133365	2.3793222642093244	0.0	0.0	-0.0039762992205748336
453	0.01	1.0	1.0	6.0	1.0	4.0	2.0	0.1	true	0.9	0.0	true	1.0	1.0	0.0010	1.0E-4	2.0	5.0	1.0	ContinuousCorrelated	SingleState	true	0.0	1.0	PoissonProcess	1000	0	1	land1882.csv	0	2040205424	true	500	0.5	0	5.0	1.0	0.01	1.0	false	0.0	0.2551419289417088	2.3717891504286968E-4	2539.8103333204444	145.75529662890943	2.540410332794916	0.0	0.0	7.715734353127902E-4
454	0.01	1.0	1.0	6.0	1.0	4.0	2.0	0.1	true	0.9	0.0	true	1.0	1.0	0.0010	1.0E-4	2.0	5.0	1.0	ContinuousCorrelated	SingleState	true	0.0	1.0	PoissonProcess	1000	0	1	land1884.csv	0	2040208186	true	500	0.5	0	5.0	1.0	0.01	1.0	false	0.0	0.19308147710042392	3.5296918166648786E-5	2390.291285999212	112.6633179909397	2.3908848811340655	0.0	0.0	-2.983306649092605E-4
455	0.01	1.0	1.0	6.0	1.0	4.0	2.0	0.1	true	0.9	0.0	true	1.0	1.0	0.0010	1.0E-4	2.0	5.0	1.0	ContinuousCorrelated	SingleState	true	0.0	1.0	PoissonProcess	1000	0	1	land1887.csv	0	2040211193	true	500	0.5	0	5.0	1.0	0.01	1.0	false	0.0	0.1925125244000642	7.568832710335979E-6	2382.9951023324315	132.47128809363338	2.3835655621992133	0.0	0.0	3.6556320682423873E-4
456	0.01	1.0	1.0	6.0	1.0	4.0	2.0	0.1	true	0.9	0.0	true	1.0	1.0	0.0010	1.0E-4	2.0	5.0	1.0	ContinuousCorrelated	SingleState	true	0.0	1.0	PoissonProcess	1000	0	1	land1938.csv	0	2040214244	true	500	0.5	0	5.0	1.0	0.01	1.0	false	0.0	0.16143578348482307	4.944625258544205E-5	2466.8849086274804	107.422688002514	2.467466719637398	0.0	0.0	-0.0030986995813018455
457	0.01	1.0	1.0	6.0	1.0	4.0	2.0	0.1	true	0.9	0.0	true	1.0	1.0	0.0010	1.0E-4	2.0	5.0	1.0	ContinuousCorrelated	SingleState	true	0.0	1.0	PoissonProcess	1000	0	1	land1940.csv	0	2040217086	true	500	0.5	0	5.0	1.0	0.01	1.0	false	0.0	0.2138084478675776	2.9987950722342502E-5	2490.0562916517847	126.01250521282546	2.4906287905687665	0.0	0.0	-0.006687282643636253
458	0.01	1.0	1.0	6.0	1.0	4.0	2.0	0.1	true	0.9	0.0	true	1.0	1.0	0.0010	1.0E-4	2.0	5.0	1.0	ContinuousCorrelated	SingleState	true	0.0	1.0	PoissonProcess	1000	0	1	land1943.csv	0	2040220162	true	500	0.5	0	5.0	1.0	0.01	1.0	false	0.0	0.17508874754597298	1.3203793845756428E-5	2351.38697176277	94.52503798906292	2.351959491710814	0.0	0.0	0.001896574337252393
459	0.01	1.0	1.0	6.0	1.0	4.0	2.0	0.1	true	0.9	0.0	true	1.0	1.0	0.0010	1.0E-4	2.0	5.0	1.0	ContinuousCorrelated	SingleState	true	0.0	1.0	PoissonProcess	1000	0	1	land2002.csv	0	2040223423	true	500	0.5	0	5.0	1.0	0.01	1.0	false	0.0	0.22794204287145492	1.0703888361642112E-4	2429.0005872970964	244.7235155790715	2.4295871774241293	0.0	0.0	0.0029694796031869302
460	0.01	1.0	1.0	6.0	1.0	4.0	2.0	0.1	true	0.9	0.0	true	1.0	1.0	0.0010	1.0E-4	2.0	5.0	1.0	ContinuousCorrelated	SingleState	true	0.0	1.0	PoissonProcess	1000	0	1	land2004.csv	0	2040226260	true	500	0.5	0	5.0	1.0	0.01	1.0	false	0.0	0.16698017085361716	1.0669675078761078E-4	2467.864499604281	99.15453166565744	2.4684352343948026	0.0	0.0	0.0035193211242202527
461	0.01	1.0	1.0	6.0	1.0	4.0	2.0	0.1	true	0.9	0.0	true	1.0	1.0	0.0010	1.0E-4	2.0	5.0	1.0	ContinuousCorrelated	SingleState	true	0.0	1.0	PoissonProcess	1000	0	1	land2007.csv	0	2040229005	true	500	0.5	0	5.0	1.0	0.01	1.0	false	0.0	0.17849847801574192	1.0609522035527651E-5	2630.4755957404664	280.07923192110735	2.6310753587613553	0.0	0.0	2.02850224490832E-4
462	0.01	1.0	1.0	6.0	1.0	4.0	2.0	0.1	true	0.9	0.0	true	1.0	1.0	0.0010	1.0E-4	2.0	5.0	1.0	ContinuousCorrelated	SingleState	true	0.0	1.0	PoissonProcess	1000	0	1	land2058.csv	0	2040232132	true	500	0.5	0	5.0	1.0	0.01	1.0	false	0.0	0.1379674670370595	4.3844115038616405E-5	2568.9340503392305	111.09157715045268	2.569525059848814	0.0	0.0	-0.0044300065347141985
463	0.01	1.0	1.0	6.0	1.0	4.0	2.0	0.1	true	0.9	0.0	true	1.0	1.0	0.0010	1.0E-4	2.0	5.0	1.0	ContinuousCorrelated	SingleState	true	0.0	1.0	PoissonProcess	1000	0	1	land2060.csv	0	2040235031	true	500	0.5	0	5.0	1.0	0.01	1.0	false	0.0	0.1815694746677288	2.627890075694106E-5	2470.7698577447964	94.36132577177186	2.4713404255952316	0.0	0.0	-0.0030526663343626824
464	0.01	1.0	1.0	6.0	1.0	4.0	2.0	0.1	true	0.9	0.0	true	1.0	1.0	0.0010	1.0E-4	2.0	5.0	1.0	ContinuousCorrelated	SingleState	true	0.0	1.0	PoissonProcess	1000	0	1	land2063.csv	0	2040238114	true	500	0.5	0	5.0	1.0	0.01	1.0	false	0.0	0.17771436359079262	1.0658761701276889E-5	2457.796586379774	145.40014969749163	2.4583835363133235	0.0	0.0	0.002890774332555722
465	0.01	1.0	1.0	6.0	1.0	4.0	2.0	0.1	true	0.9	0.0	true	1.0	1.0	0.0010	1.0E-4	2.0	5.0	1.0	ContinuousCorrelated	SingleState	true	0.0	1.0	PoissonProcess	1000	0	1	land2122.csv	0	2040241310	true	500	0.5	0	5.0	1.0	0.01	1.0	false	0.0	0.2582714409827066	1.2180786657175275E-4	2577.9621910325545	164.13624486639867	2.5785401967623294	0.0	0.0	-9.993965443164626E-4
466	0.01	1.0	1.0	6.0	1.0	4.0	2.0	0.1	true	0.9	0.0	true	1.0	1.0	0.0010	1.0E-4	2.0	5.0	1.0	ContinuousCorrelated	SingleState	true	0.0	1.0	PoissonProcess	1000	0	1	land2124.csv	0	2040244132	true	500	0.5	0	5.0	1.0	0.01	1.0	false	0.0	0.1369347098622471	4.655919463773834E-5	2448.329141326337	130.477229197628	2.4489116205726535	0.0	0.0	8.014433387556207E-4
467	0.01	1.0	1.0	6.0	1.0	4.0	2.0	0.1	true	0.9	0.0	true	1.0	1.0	0.0010	1.0E-4	2.0	5.0	1.0	ContinuousCorrelated	SingleState	true	0.0	1.0	PoissonProcess	1000	0	1	land2127.csv	0	2040246973	true	500	0.5	0	5.0	1.0	0.01	1.0	false	0.0	0.18651977602428393	1.2912092899749448E-5	2490.5509319331863	214.8108800040987	2.491147589529222	0.0	0.0	-0.0025829974878971863
468	0.01	1.0	1.0	6.0	1.0	4.0	2.0	0.1	true	0.9	0.0	true	1.0	1.0	0.0010	1.0E-4	2.0	5.0	1.0	ContinuousCorrelated	SingleState	true	0.0	1.0	PoissonProcess	1000	0	1	land2178.csv	0	2040250090	true	500	0.5	0	5.0	1.0	0.01	1.0	false	0.0	0.17706660832901913	5.0099314825063875E-5	2451.7062492696405	90.69744889728538	2.452277346824194	0.0	0.0	-0.001916717045202492
469	0.01	1.0	1.0	6.0	1.0	4.0	2.0	0.1	true	0.9	0.0	true	1.0	1.0	0.0010	1.0E-4	2.0	5.0	1.0	ContinuousCorrelated	SingleState	true	0.0	1.0	PoissonProcess	1000	0	1	land2180.csv	0	2040253014	true	500	0.5	0	5.0	1.0	0.01	1.0	false	0.0	0.18544227986195572	2.5301849148112882E-5	2439.0119098826117	123.95933152351833	2.4395906418897506	0.0	0.0	9.734581919075737E-4
470	0.01	1.0	1.0	6.0	1.0	4.0	2.0	0.1	true	0.9	0.0	true	1.0	1.0	0.0010	1.0E-4	2.0	5.0	1.0	ContinuousCorrelated	SingleState	true	0.0	1.0	PoissonProcess	1000	0	1	land2183.csv	0	2040256156	true	500	0.5	0	5.0	1.0	0.01	1.0	false	0.0	0.17746686391544997	1.1214306221071535E-5	2559.4276974211703	213.38461149502135	2.5600163821623143	0.0	0.0	-0.0015247928597942404
471	0.01	1.0	1.0	6.0	1.0	4.0	2.0	0.1	true	0.9	0.0	true	1.0	1.0	0.0010	1.0E-4	2.0	5.0	1.0	ContinuousCorrelated	SingleState	true	0.0	1.0	PoissonProcess	1000	0	1	land2242.csv	0	2040259303	true	500	0.5	0	5.0	1.0	0.01	1.0	false	0.0	0.2751968281184132	1.3122479488996363E-4	2580.8750392496318	104.5111106850556	2.5814736535302933	0.0	0.0	0.0027959893426924933
472	0.01	1.0	1.0	6.0	1.0	4.0	2.0	0.1	true	0.9	0.0	true	1.0	1.0	0.0010	1.0E-4	2.0	5.0	1.0	ContinuousCorrelated	SingleState	true	0.0	1.0	PoissonProcess	1000	0	1	land2244.csv	0	2040262077	true	500	0.5	0	5.0	1.0	0.01	1.0	false	0.0	0.15005382709832088	2.72650338504552E-5	2374.3566968910227	90.961514988722	2.374932346751116	0.0	0.0	-0.0021503960900887014
473	0.01	1.0	1.0	6.0	1.0	4.0	2.0	0.1	true	0.9	0.0	true	1.0	1.0	0.0010	1.0E-4	2.0	5.0	1.0	ContinuousCorrelated	SingleState	true	0.0	1.0	PoissonProcess	1000	0	1	land2247.csv	0	2040265115	true	500	0.5	0	5.0	1.0	0.01	1.0	false	0.0	0.20065326954939272	1.0444660937519804E-5	2478.2323896108037	107.93170592678655	2.4788060472435283	0.0	0.0	-0.00258267372329833
474	0.01	1.0	1.0	6.0	1.0	4.0	2.0	0.1	true	0.9	0.0	true	1.0	1.0	0.0010	1.0E-4	2.0	5.0	1.0	ContinuousCorrelated	SingleState	true	0.0	1.0	PoissonProcess	1000	0	1	land2298.csv	0	2040268239	true	500	0.5	0	5.0	1.0	0.01	1.0	false	0.0	0.14571398360557128	3.518760276504178E-5	2394.290215691774	153.00766006994982	2.3948639136822782	0.0	0.0	-0.00326949779768621
475	0.01	1.0	1.0	6.0	1.0	4.0	2.0	0.1	true	0.9	0.0	true	1.0	1.0	0.0010	1.0E-4	2.0	5.0	1.0	ContinuousCorrelated	SingleState	true	0.0	1.0	PoissonProcess	1000	0	1	land2300.csv	0	2040271194	true	500	0.5	0	5.0	1.0	0.01	1.0	false	0.0	0.1774523995500889	2.6603633373198218E-5	2414.717013172268	114.75377106904051	2.415293164995865	0.0	0.0	-0.0013847363935238527
476	0.01	1.0	1.0	6.0	1.0	4.0	2.0	0.1	true	0.9	0.0	true	1.0	1.0	0.0010	1.0E-4	2.0	5.0	1.0	ContinuousCorrelated	SingleState	true	0.0	1.0	PoissonProcess	1000	0	1	land2303.csv	0	2040274361	true	500	0.5	0	5.0	1.0	0.01	1.0	false	0.0	0.18040768271525554	1.0020700701772068E-5	2580.40864305987	98.96832265193986	2.580980481202835	0.0	0.0	3.83882398662192E-4
477	0.01	1.0	1.0	6.0	1.0	4.0	2.0	0.1	true	0.9	0.0	true	1.0	1.0	0.0010	1.0E-4	2.0	5.0	1.0	ContinuousCorrelated	SingleState	true	0.0	1.0	PoissonProcess	1000	0	1	land2362.csv	0	2040277553	true	500	0.5	0	5.0	1.0	0.01	1.0	false	0.0	0.20559881335887778	5.108594699559437E-5	2531.532804233974	194.40899829485437	2.532118221625712	0.0	0.0	-0.004090503219652953
478	0.01	1.0	1.0	6.0	1.0	4.0	2.0	0.1	true	0.9	0.0	true	1.0	1.0	0.0010	1.0E-4	2.0	5.0	1.0	ContinuousCorrelated	SingleState	true	0.0	1.0	PoissonProcess	1000	0	1	land2364.csv	0	2040280516	true	500	0.5	0	5.0	1.0	0.01	1.0	false	0.0	0.18436235594104292	5.318977337622493E-5	2455.0800488726127	88.38850617054958	2.455679959379573	0.0	0.0	0.0011073313045945762
479	0.01	1.0	1.0	6.0	1.0	4.0	2.0	0.1	true	0.9	0.0	true	1.0	1.0	0.0010	1.0E-4	2.0	5.0	1.0	ContinuousCorrelated	SingleState	true	0.0	1.0	PoissonProcess	1000	0	1	land2367.csv	0	2040283404	true	500	0.5	0	5.0	1.0	0.01	1.0	false	0.0	0.17304650305765332	1.1658249897873036E-5	2401.6124321105544	130.39683646436953	2.402193348712133	0.0	0.0	0.0014511421664709563
480	0.0050	1.0	1.0	6.0	1.0	4.0	2.0	0.1	true	0.9	0.0	true	1.0	1.0	0.0010	1.0E-4	2.0	5.0	1.0	ContinuousCorrelated	Kinesis	true	0.0	1.0	PoissonProcess	1000	0	1	land18.csv	0	2040286558	true	500	0.5	0	5.0	1.0	0.01	1.0	false	0.0	0.33608771007865523	5.1496993387534717E-5	1501.803830323679	51.66254001325196	1.5024038066060696	2.351835959122452	0.49393536306737873	-0.0013652758842542282
481	0.0050	1.0	1.0	6.0	1.0	4.0	2.0	0.1	true	0.9	0.0	true	1.0	1.0	0.0010	1.0E-4	2.0	5.0	1.0	ContinuousCorrelated	Kinesis	true	0.0	1.0	PoissonProcess	1000	0	1	land20.csv	0	2040289457	true	500	0.5	0	5.0	1.0	0.01	1.0	false	0.0	0.24975192951484568	2.1924035281892627E-5	1176.1778966712186	64.63456555573262	1.176759360883325	2.1311564989690854	0.5016582266696875	0.00811261744656943
482	0.0050	1.0	1.0	6.0	1.0	4.0	2.0	0.1	true	0.9	0.0	true	1.0	1.0	0.0010	1.0E-4	2.0	5.0	1.0	ContinuousCorrelated	Kinesis	true	0.0	1.0	PoissonProcess	1000	0	1	land23.csv	0	2040292588	true	500	0.5	0	5.0	1.0	0.01	1.0	false	0.0	0.18328858100445186	1.0414840692101131E-5	1263.669794981967	103.87914888773388	1.264242349197349	2.0404875704408374	0.47894015293231396	0.004507707033625566
483	0.0050	1.0	1.0	6.0	1.0	4.0	2.0	0.1	true	0.9	0.0	true	1.0	1.0	0.0010	1.0E-4	2.0	5.0	1.0	ContinuousCorrelated	Kinesis	true	0.0	1.0	PoissonProcess	1000	0	1	land82.csv	0	2040295751	true	500	0.5	0	5.0	1.0	0.01	1.0	false	0.0	0.3791189147316762	9.942285600031581E-5	1847.9690952655262	147.78460333387417	1.8485636770383567	2.3696152565344	0.5087167583342539	0.005753643835086033
484	0.0050	1.0	1.0	6.0	1.0	4.0	2.0	0.1	true	0.9	0.0	true	1.0	1.0	0.0010	1.0E-4	2.0	5.0	1.0	ContinuousCorrelated	Kinesis	true	0.0	1.0	PoissonProcess	1000	0	1	land84.csv	0	2040298513	true	500	0.5	0	5.0	1.0	0.01	1.0	false	0.0	0.2306651661671678	2.3803048168685528E-5	1367.4047981196888	59.838328179243746	1.3679796427952422	2.3151671206784297	0.505830964263552	0.0039979222651516585
485	0.0050	1.0	1.0	6.0	1.0	4.0	2.0	0.1	true	0.9	0.0	true	1.0	1.0	0.0010	1.0E-4	2.0	5.0	1.0	ContinuousCorrelated	Kinesis	true	0.0	1.0	PoissonProcess	1000	0	1	land87.csv	0	2040301591	true	500	0.5	0	5.0	1.0	0.01	1.0	false	0.0	0.15262745267770633	9.03175105767323E-6	1448.0957733734067	170.86565596189322	1.4486686218461404	2.1033274002574256	0.46134400820503607	-0.004642350345855972
486	0.0050	1.0	1.0	6.0	1.0	4.0	2.0	0.1	true	0.9	0.0	true	1.0	1.0	0.0010	1.0E-4	2.0	5.0	1.0	ContinuousCorrelated	Kinesis	true	0.0	1.0	PoissonProcess	1000	0	1	land138.csv	0	2040304588	true	500	0.5	0	5.0	1.0	0.01	1.0	false	0.0	0.23912164590700327	4.73088622715539E-5	1625.3462735868072	71.25513068604016	1.625934108064554	2.2654741990376315	0.4924215487102876	0.002170342585867526
487	0.0050	1.0	1.0	6.0	1.0	4.0	2.0	0.1	true	0.9	0.0	true	1.0	1.0	0.0010	1.0E-4	2.0	5.0	1.0	ContinuousCorrelated	Kinesis	true	0.0	1.0	PoissonProcess	1000	0	1	land140.csv	0	2040307524	true	500	0.5	0	5.0	1.0	0.01	1.0	false	0.0	0.21593504422321794	1.9976397250278946E-5	1300.8147889373329	43.6008675807503	1.3014125392765041	2.1938414586750623	0.48910617806653667	0.001970353074229001
488	0.0050	1.0	1.0	6.0	1.0	4.0	2.0	0.1	true	0.9	0.0	true	1.0	1.0	0.0010	1.0E-4	2.0	5.0	1.0	ContinuousCorrelated	Kinesis	true	0.0	1.0	PoissonProcess	1000	0	1	land143.csv	0	2040310736	true	500	0.5	0	5.0	1.0	0.01	1.0	false	0.0	0.18228824727683798	7.866263754303605E-6	1273.2756078624416	54.96539397573479	1.273869070689686	2.0616515362857073	0.4876605960339167	0.0012847532184408225
489	0.0050	1.0	1.0	6.0	1.0	4.0	2.0	0.1	true	0.9	0.0	true	1.0	1.0	0.0010	1.0E-4	2.0	5.0	1.0	ContinuousCorrelated	Kinesis	true	0.0	1.0	PoissonProcess	1000	0	1	land202.csv	0	2040313813	true	500	0.5	0	5.0	1.0	0.01	1.0	false	0.0	0.08443042041281931	3.776113015170953E-5	2238.021254297492	228.1847781392121	2.2386211922058403	2.416045432264108	0.479099580099573	6.030964649608384E-4
490	0.0050	1.0	1.0	6.0	1.0	4.0	2.0	0.1	true	0.9	0.0	true	1.0	1.0	0.0010	1.0E-4	2.0	5.0	1.0	ContinuousCorrelated	Kinesis	true	0.0	1.0	PoissonProcess	1000	0	1	land204.csv	0	2040316646	true	500	0.5	0	5.0	1.0	0.01	1.0	false	0.0	0.3057685491131367	3.709907714195314E-5	1384.7538411513613	76.34947837028929	1.385349192711241	2.408857199847385	0.5232492279679577	-5.465694534752042E-4
491	0.0050	1.0	1.0	6.0	1.0	4.0	2.0	0.1	true	0.9	0.0	true	1.0	1.0	0.0010	1.0E-4	2.0	5.0	1.0	ContinuousCorrelated	Kinesis	true	0.0	1.0	PoissonProcess	1000	0	1	land207.csv	0	2040319577	true	500	0.5	0	5.0	1.0	0.01	1.0	false	0.0	0.21957859839779303	1.1467041833245503E-5	1019.8280183379153	33.002573757005266	1.0204267829157905	2.0755314568851637	0.5128764302717584	-0.0038135680437946093
492	0.0050	1.0	1.0	6.0	1.0	4.0	2.0	0.1	true	0.9	0.0	true	1.0	1.0	0.0010	1.0E-4	2.0	5.0	1.0	ContinuousCorrelated	Kinesis	true	0.0	1.0	PoissonProcess	1000	0	1	land258.csv	0	2040322749	true	500	0.5	0	5.0	1.0	0.01	1.0	false	0.0	0.32379524376378477	5.54067812159949E-5	1567.215916184075	55.42175297185253	1.5678122947442255	2.294787248049405	0.5186451681442712	0.0036432078271726198
493	0.0050	1.0	1.0	6.0	1.0	4.0	2.0	0.1	true	0.9	0.0	true	1.0	1.0	0.0010	1.0E-4	2.0	5.0	1.0	ContinuousCorrelated	Kinesis	true	0.0	1.0	PoissonProcess	1000	0	1	land260.csv	0	2040325652	true	500	0.5	0	5.0	1.0	0.01	1.0	false	0.0	0.2754557326241557	2.7171793884679337E-5	1249.1111532747389	62.63133614406018	1.249700196384308	2.208307429562995	0.5019933797611297	0.0016193122461892835
494	0.0050	1.0	1.0	6.0	1.0	4.0	2.0	0.1	true	0.9	0.0	true	1.0	1.0	0.0010	1.0E-4	2.0	5.0	1.0	ContinuousCorrelated	Kinesis	true	0.0	1.0	PoissonProcess	1000	0	1	land263.csv	0	2040328738	true	500	0.5	0	5.0	1.0	0.01	1.0	false	0.0	0.19171330404580014	8.393974554226006E-6	1288.4144321361887	157.15413073890016	1.2890006065889148	2.1791847326702785	0.5106109255824313	-0.0018135004223131853
495	0.0050	1.0	1.0	6.0	1.0	4.0	2.0	0.1	true	0.9	0.0	true	1.0	1.0	0.0010	1.0E-4	2.0	5.0	1.0	ContinuousCorrelated	Kinesis	true	0.0	1.0	PoissonProcess	1000	0	1	land322.csv	0	2040332005	true	500	0.5	0	5.0	1.0	0.01	1.0	false	0.0	0.13718109551958158	3.1032922138158134E-5	2015.479889958694	100.37492183603017	2.0160534815432767	2.467627371865798	0.5369993670666456	0.0020496613007141696
496	0.0050	1.0	1.0	6.0	1.0	4.0	2.0	0.1	true	0.9	0.0	true	1.0	1.0	0.0010	1.0E-4	2.0	5.0	1.0	ContinuousCorrelated	Kinesis	true	0.0	1.0	PoissonProcess	1000	0	1	land324.csv	0	2040334941	true	500	0.5	0	5.0	1.0	0.01	1.0	false	0.0	0.20512000807751357	2.5326667006515546E-5	1540.4645442788708	70.6421879076635	1.54105648167718	2.3529574397949378	0.49378419015501357	-0.0019924831418052028
497	0.0050	1.0	1.0	6.0	1.0	4.0	2.0	0.1	true	0.9	0.0	true	1.0	1.0	0.0010	1.0E-4	2.0	5.0	1.0	ContinuousCorrelated	Kinesis	true	0.0	1.0	PoissonProcess	1000	0	1	land327.csv	0	2040337949	true	500	0.5	0	5.0	1.0	0.01	1.0	false	0.0	0.1595375807349589	7.407903931788265E-6	1554.4668857447841	103.08002111773376	1.5550391477238334	2.167748460348955	0.5237739161441712	-2.2632391376487633E-4
498	0.0050	1.0	1.0	6.0	1.0	4.0	2.0	0.1	true	0.9	0.0	true	1.0	1.0	0.0010	1.0E-4	2.0	5.0	1.0	ContinuousCorrelated	Kinesis	true	0.0	1.0	PoissonProcess	1000	0	1	land378.csv	0	2040341034	true	500	0.5	0	5.0	1.0	0.01	1.0	false	0.0	0.22403073892170963	6.173723199631102E-5	1847.6205503009967	87.41733137053352	1.8481911762304466	2.3347641754682527	0.5286283208364464	-0.0036684029046267523
499	0.0050	1.0	1.0	6.0	1.0	4.0	2.0	0.1	true	0.9	0.0	true	1.0	1.0	0.0010	1.0E-4	2.0	5.0	1.0	ContinuousCorrelated	Kinesis	true	0.0	1.0	PoissonProcess	1000	0	1	land380.csv	0	2040343932	true	500	0.5	0	5.0	1.0	0.01	1.0	false	0.0	0.19858410970473225	2.075437882462296E-5	1375.7077577073896	62.45965281147699	1.3763059563914959	2.135427945888371	0.49266233347357397	-6.418567390348794E-4
500	0.0050	1.0	1.0	6.0	1.0	4.0	2.0	0.1	true	0.9	0.0	true	1.0	1.0	0.0010	1.0E-4	2.0	5.0	1.0	ContinuousCorrelated	Kinesis	true	0.0	1.0	PoissonProcess	1000	0	1	land383.csv	0	2040346946	true	500	0.5	0	5.0	1.0	0.01	1.0	false	0.0	0.18700806967250055	7.884575796082458E-6	1318.3848408209906	60.25906162732196	1.3189848361229388	2.172904842082006	0.5131963756892595	0.004714795688454259
501	0.0050	1.0	1.0	6.0	1.0	4.0	2.0	0.1	true	0.9	0.0	true	1.0	1.0	0.0010	1.0E-4	2.0	5.0	1.0	ContinuousCorrelated	Kinesis	true	0.0	1.0	PoissonProcess	1000	0	1	land442.csv	0	2040350139	true	500	0.5	0	5.0	1.0	0.01	1.0	false	0.0	0.17738007269257372	4.3217844962874344E-5	2025.0600068655706	110.29258130930133	2.0256428594068523	2.4172976832455833	0.4764908257691894	-0.003440171879592294
502	0.0050	1.0	1.0	6.0	1.0	4.0	2.0	0.1	true	0.9	0.0	true	1.0	1.0	0.0010	1.0E-4	2.0	5.0	1.0	ContinuousCorrelated	Kinesis	true	0.0	1.0	PoissonProcess	1000	0	1	land444.csv	0	2040353047	true	500	0.5	0	5.0	1.0	0.01	1.0	false	0.0	0.3381533782043307	4.95936423308765E-5	1549.5231745620843	284.64622172296924	1.5500981945016772	2.431106685483664	0.5494140520321803	0.0038757719442415353
503	0.0050	1.0	1.0	6.0	1.0	4.0	2.0	0.1	true	0.9	0.0	true	1.0	1.0	0.0010	1.0E-4	2.0	5.0	1.0	ContinuousCorrelated	Kinesis	true	0.0	1.0	PoissonProcess	1000	0	1	land447.csv	0	2040355925	true	500	0.5	0	5.0	1.0	0.01	1.0	false	0.0	0.17280539121356228	1.148803118655432E-5	1434.2996768009707	179.8589044790757	1.4348977928803612	2.2772511009194445	0.5027549811826011	0.002274620208936121
504	0.0050	1.0	1.0	6.0	1.0	4.0	2.0	0.1	true	0.9	0.0	true	1.0	1.0	0.0010	1.0E-4	2.0	5.0	1.0	ContinuousCorrelated	Kinesis	true	0.0	1.0	PoissonProcess	1000	0	1	land498.csv	0	2040359242	true	500	0.5	0	5.0	1.0	0.01	1.0	false	0.0	0.37257208068051284	5.8333167942881504E-5	1390.560491304581	81.79185577984899	1.3911544054160014	2.2426206102462505	0.4917133414199102	1.6374459771935766E-4
505	0.0050	1.0	1.0	6.0	1.0	4.0	2.0	0.1	true	0.9	0.0	true	1.0	1.0	0.0010	1.0E-4	2.0	5.0	1.0	ContinuousCorrelated	Kinesis	true	0.0	1.0	PoissonProcess	1000	0	1	land500.csv	0	2040362205	true	500	0.5	0	5.0	1.0	0.01	1.0	false	0.0	0.24330301832856585	2.336782278874197E-5	1283.8031141507026	58.98051824517312	1.284398497717803	2.165646442789528	0.5343100024494071	-4.677421807685482E-4
506	0.0050	1.0	1.0	6.0	1.0	4.0	2.0	0.1	true	0.9	0.0	true	1.0	1.0	0.0010	1.0E-4	2.0	5.0	1.0	ContinuousCorrelated	Kinesis	true	0.0	1.0	PoissonProcess	1000	0	1	land503.csv	0	2040365230	true	500	0.5	0	5.0	1.0	0.01	1.0	false	0.0	0.18625397704623675	7.704392127319083E-6	1331.1528137851597	77.2939196469009	1.3317293932861434	2.209138980640429	0.5031121726406499	-0.0021886087147243286
507	0.0050	1.0	1.0	6.0	1.0	4.0	2.0	0.1	true	0.9	0.0	true	1.0	1.0	0.0010	1.0E-4	2.0	5.0	1.0	ContinuousCorrelated	Kinesis	true	0.0	1.0	PoissonProcess	1000	0	1	land562.csv	0	2040368382	true	500	0.5	0	5.0	1.0	0.01	1.0	false	0.0	0.23874252025400464	9.405633465385516E-5	2193.4095478562076	132.25533325013663	2.1940049370065546	2.417635174510933	0.5176331566317754	-0.004175560710692027
508	0.0050	1.0	1.0	6.0	1.0	4.0	2.0	0.1	true	0.9	0.0	true	1.0	1.0	0.0010	1.0E-4	2.0	5.0	1.0	ContinuousCorrelated	Kinesis	true	0.0	1.0	PoissonProcess	1000	0	1	land564.csv	0	2040371232	true	500	0.5	0	5.0	1.0	0.01	1.0	false	0.0	0.24254454035858375	1.8904891573168016E-5	1219.4009784518548	57.70013722825667	1.2199722496369267	2.3599938710930037	0.5478469604967898	-5.578119425962119E-4
509	0.0050	1.0	1.0	6.0	1.0	4.0	2.0	0.1	true	0.9	0.0	true	1.0	1.0	0.0010	1.0E-4	2.0	5.0	1.0	ContinuousCorrelated	Kinesis	true	0.0	1.0	PoissonProcess	1000	0	1	land567.csv	0	2040374394	true	500	0.5	0	5.0	1.0	0.01	1.0	false	0.0	0.15650416595029248	1.2238291477602868E-5	1485.6912396632188	287.20918629530564	1.4862896747949774	2.1870279712123395	0.503774797017373	-5.075974987350345E-4
510	0.0050	1.0	1.0	6.0	1.0	4.0	2.0	0.1	true	0.9	0.0	true	1.0	1.0	0.0010	1.0E-4	2.0	5.0	1.0	ContinuousCorrelated	Kinesis	true	0.0	1.0	PoissonProcess	1000	0	1	land618.csv	0	2040377561	true	500	0.5	0	5.0	1.0	0.01	1.0	false	0.0	0.32936277229927224	7.241748954731159E-5	1744.7146227883768	88.69690849530909	1.7452851614545932	2.333224739783817	0.493614044135428	-0.0024916092178677127
511	0.0050	1.0	1.0	6.0	1.0	4.0	2.0	0.1	true	0.9	0.0	true	1.0	1.0	0.0010	1.0E-4	2.0	5.0	1.0	ContinuousCorrelated	Kinesis	true	0.0	1.0	PoissonProcess	1000	0	1	land620.csv	0	2040380438	true	500	0.5	0	5.0	1.0	0.01	1.0	false	0.0	0.2910003338197592	2.777163995819364E-5	1218.4317591188121	46.942301740072125	1.2190062612200108	2.2730023704131477	0.5066271245724608	5.170720806196471E-4
512	0.0050	1.0	1.0	6.0	1.0	4.0	2.0	0.1	true	0.9	0.0	true	1.0	1.0	0.0010	1.0E-4	2.0	5.0	1.0	ContinuousCorrelated	Kinesis	true	0.0	1.0	PoissonProcess	1000	0	1	land623.csv	0	2040383466	true	500	0.5	0	5.0	1.0	0.01	1.0	false	0.0	0.1901971747289422	8.364163897306344E-6	1224.3509197009616	47.97289792128606	1.224942516380852	2.0922063879744432	0.4944468603517734	0.0054862733220823285
513	0.0050	1.0	1.0	6.0	1.0	4.0	2.0	0.1	true	0.9	0.0	true	1.0	1.0	0.0010	1.0E-4	2.0	5.0	1.0	ContinuousCorrelated	Kinesis	true	0.0	1.0	PoissonProcess	1000	0	1	land682.csv	0	2040386665	true	500	0.5	0	5.0	1.0	0.01	1.0	false	0.0	0.2841427267337714	5.226882566695543E-5	1793.61001762142	78.77105232257895	1.7942098398875728	2.508933965927452	0.5263427702550919	0.0011107854767965512
514	0.0050	1.0	1.0	6.0	1.0	4.0	2.0	0.1	true	0.9	0.0	true	1.0	1.0	0.0010	1.0E-4	2.0	5.0	1.0	ContinuousCorrelated	Kinesis	true	0.0	1.0	PoissonProcess	1000	0	1	land684.csv	0	2040389583	true	500	0.5	0	5.0	1.0	0.01	1.0	false	0.0	0.3408993171114815	4.4637285051171916E-5	1421.4832049281074	52.8215904158444	1.4220764396556196	2.3869666490481327	0.4916804392808708	0.0033276572784673767
515	0.0050	1.0	1.0	6.0	1.0	4.0	2.0	0.1	true	0.9	0.0	true	1.0	1.0	0.0010	1.0E-4	2.0	5.0	1.0	ContinuousCorrelated	Kinesis	true	0.0	1.0	PoissonProcess	1000	0	1	land687.csv	0	2040392378	true	500	0.5	0	5.0	1.0	0.01	1.0	false	0.0	0.14910773473323358	7.272631398356836E-6	1702.1333535803874	75.26667125713966	1.7027046377017059	2.261700380815078	0.49216653113680314	0.003127877027034686
516	0.0050	1.0	1.0	6.0	1.0	4.0	2.0	0.1	true	0.9	0.0	true	1.0	1.0	0.0010	1.0E-4	2.0	5.0	1.0	ContinuousCorrelated	Kinesis	true	0.0	1.0	PoissonProcess	1000	0	1	land738.csv	0	2040395579	true	500	0.5	0	5.0	1.0	0.01	1.0	false	0.0	0.41109960654484523	7.840177849690682E-5	1616.584756459433	112.09992117160012	1.6171837902207402	2.372183399892488	0.4959418251614996	0.003842095232237101
517	0.0050	1.0	1.0	6.0	1.0	4.0	2.0	0.1	true	0.9	0.0	true	1.0	1.0	0.0010	1.0E-4	2.0	5.0	1.0	ContinuousCorrelated	Kinesis	true	0.0	1.0	PoissonProcess	1000	0	1	land740.csv	0	2040398379	true	500	0.5	0	5.0	1.0	0.01	1.0	false	0.0	0.2461534227370476	2.261337796066151E-5	1298.9495668855748	83.38772802182133	1.2995225789611453	2.3234199423783393	0.5134546543861375	0.004351529377649312
518	0.0050	1.0	1.0	6.0	1.0	4.0	2.0	0.1	true	0.9	0.0	true	1.0	1.0	0.0010	1.0E-4	2.0	5.0	1.0	ContinuousCorrelated	Kinesis	true	0.0	1.0	PoissonProcess	1000	0	1	land743.csv	0	2040401455	true	500	0.5	0	5.0	1.0	0.01	1.0	false	0.0	0.19752567112307615	8.730680112799015E-6	1283.560804264846	66.29553178842875	1.2841315713075767	2.280748401066003	0.4994850771009739	-0.0012333262978278421
519	0.0050	1.0	1.0	6.0	1.0	4.0	2.0	0.1	true	0.9	0.0	true	1.0	1.0	0.0010	1.0E-4	2.0	5.0	1.0	ContinuousCorrelated	Kinesis	true	0.0	1.0	PoissonProcess	1000	0	1	land802.csv	0	2040404632	true	500	0.5	0	5.0	1.0	0.01	1.0	false	0.0	0.5922317411963988	8.126761017582428E-5	1188.814572450464	55.416993714002835	1.189384647683186	2.121458322743445	0.5292586728284117	0.004554055287672174
520	0.0050	1.0	1.0	6.0	1.0	4.0	2.0	0.1	true	0.9	0.0	true	1.0	1.0	0.0010	1.0E-4	2.0	5.0	1.0	ContinuousCorrelated	Kinesis	true	0.0	1.0	PoissonProcess	1000	0	1	land804.csv	0	2040407329	true	500	0.5	0	5.0	1.0	0.01	1.0	false	0.0	0.2175052794393624	3.658747179608314E-5	1772.7581260246368	154.84305784776663	1.7733468452626326	2.4465044389976804	0.5093602843644397	0.0026167413073529414
521	0.0050	1.0	1.0	6.0	1.0	4.0	2.0	0.1	true	0.9	0.0	true	1.0	1.0	0.0010	1.0E-4	2.0	5.0	1.0	ContinuousCorrelated	Kinesis	true	0.0	1.0	PoissonProcess	1000	0	1	land807.csv	0	2040410225	true	500	0.5	0	5.0	1.0	0.01	1.0	false	0.0	0.19324902745496345	1.1132732770031471E-5	1307.8461932877988	49.948286231264696	1.3084232154233184	2.3393397832750686	0.5101762491165343	0.004183849597417445
522	0.0050	1.0	1.0	6.0	1.0	4.0	2.0	0.1	true	0.9	0.0	true	1.0	1.0	0.0010	1.0E-4	2.0	5.0	1.0	ContinuousCorrelated	Kinesis	true	0.0	1.0	PoissonProcess	1000	0	1	land858.csv	0	2040413433	true	500	0.5	0	5.0	1.0	0.01	1.0	false	0.0	0.4094617203124311	6.827337364738123E-5	1594.214952261565	182.40001911248328	1.594813989147367	2.5137294979208282	0.4784792016340937	0.00480973706407195
523	0.0050	1.0	1.0	6.0	1.0	4.0	2.0	0.1	true	0.9	0.0	true	1.0	1.0	0.0010	1.0E-4	2.0	5.0	1.0	ContinuousCorrelated	Kinesis	true	0.0	1.0	PoissonProcess	1000	0	1	land860.csv	0	2040416338	true	500	0.5	0	5.0	1.0	0.01	1.0	false	0.0	0.2542893259557104	2.4719930646646713E-5	1242.9677956097855	73.65804597723542	1.2435526213672425	2.1291207408819224	0.5178250357970011	0.0032432954276818337
524	0.0050	1.0	1.0	6.0	1.0	4.0	2.0	0.1	true	0.9	0.0	true	1.0	1.0	0.0010	1.0E-4	2.0	5.0	1.0	ContinuousCorrelated	Kinesis	true	0.0	1.0	PoissonProcess	1000	0	1	land863.csv	0	2040419450	true	500	0.5	0	5.0	1.0	0.01	1.0	false	0.0	0.20194098667236007	8.363652561895812E-6	1193.381971278926	71.42084530829617	1.1939679025034955	2.3074149815250986	0.5042618171176442	0.0034744760604054335
525	0.0050	1.0	1.0	6.0	1.0	4.0	2.0	0.1	true	0.9	0.0	true	1.0	1.0	0.0010	1.0E-4	2.0	5.0	1.0	ContinuousCorrelated	Kinesis	true	0.0	1.0	PoissonProcess	1000	0	1	land922.csv	0	2040422729	true	500	0.5	0	5.0	1.0	0.01	1.0	false	0.0	0.45888273777041744	7.093953730482339E-5	1432.2469637046986	135.54108304623858	1.432837221220531	2.3270849856539018	0.5005985386903269	0.00516145091401028
526	0.0050	1.0	1.0	6.0	1.0	4.0	2.0	0.1	true	0.9	0.0	true	1.0	1.0	0.0010	1.0E-4	2.0	5.0	1.0	ContinuousCorrelated	Kinesis	true	0.0	1.0	PoissonProcess	1000	0	1	land924.csv	0	2040425602	true	500	0.5	0	5.0	1.0	0.01	1.0	false	0.0	0.18288737270969693	1.8064269805921123E-5	1406.0861447315467	79.30755332428618	1.406660709102971	2.1984129508596086	0.5077184350436068	0.003224838900525972
527	0.0050	1.0	1.0	6.0	1.0	4.0	2.0	0.1	true	0.9	0.0	true	1.0	1.0	0.0010	1.0E-4	2.0	5.0	1.0	ContinuousCorrelated	Kinesis	true	0.0	1.0	PoissonProcess	1000	0	1	land927.csv	0	2040428821	true	500	0.5	0	5.0	1.0	0.01	1.0	false	0.0	0.18960557493321023	1.255617409681203E-5	1370.5538229898664	46.413758439205324	1.3711289750448523	2.2333376492688655	0.5058107524064889	0.0022570119468867215
528	0.0050	1.0	1.0	6.0	1.0	4.0	2.0	0.1	true	0.9	0.0	true	1.0	1.0	0.0010	1.0E-4	2.0	5.0	1.0	ContinuousCorrelated	Kinesis	true	0.0	1.0	PoissonProcess	1000	0	1	land978.csv	0	2040431934	true	500	0.5	0	5.0	1.0	0.01	1.0	false	0.0	0.3750928577942378	5.216871013468447E-5	1503.5144932651192	55.61283911370848	1.5040965588408073	2.492168091094534	0.5203629977923588	0.0015634100754059967
529	0.0050	1.0	1.0	6.0	1.0	4.0	2.0	0.1	true	0.9	0.0	true	1.0	1.0	0.0010	1.0E-4	2.0	5.0	1.0	ContinuousCorrelated	Kinesis	true	0.0	1.0	PoissonProcess	1000	0	1	land980.csv	0	2040434812	true	500	0.5	0	5.0	1.0	0.01	1.0	false	0.0	0.2180030966031188	1.8917006927779394E-5	1283.3214343297766	59.1024239588685	1.2839205622850798	2.2294228478019793	0.4939193868678672	0.0061650490812890655
530	0.0050	1.0	1.0	6.0	1.0	4.0	2.0	0.1	true	0.9	0.0	true	1.0	1.0	0.0010	1.0E-4	2.0	5.0	1.0	ContinuousCorrelated	Kinesis	true	0.0	1.0	PoissonProcess	1000	0	1	land983.csv	0	2040437987	true	500	0.5	0	5.0	1.0	0.01	1.0	false	0.0	0.19300627300843454	7.963460474270003E-6	1169.9499806288366	66.35451944517095	1.1705307286029125	2.033665698792515	0.49564900208972656	-0.0043778291461172856
531	0.0050	1.0	1.0	6.0	1.0	4.0	2.0	0.1	true	0.9	0.0	true	1.0	1.0	0.0010	1.0E-4	2.0	5.0	1.0	ContinuousCorrelated	Kinesis	true	0.0	1.0	PoissonProcess	1000	0	1	land1042.csv	0	2040441193	true	500	0.5	0	5.0	1.0	0.01	1.0	false	0.0	0.3167142818719913	7.186965995996776E-5	1944.1440034831135	87.32529192273277	1.9447316892970286	2.431619989893621	0.5215050405150778	8.282788364532248E-4
532	0.0050	1.0	1.0	6.0	1.0	4.0	2.0	0.1	true	0.9	0.0	true	1.0	1.0	0.0010	1.0E-4	2.0	5.0	1.0	ContinuousCorrelated	Kinesis	true	0.0	1.0	PoissonProcess	1000	0	1	land1044.csv	0	2040444053	true	500	0.5	0	5.0	1.0	0.01	1.0	false	0.0	0.21045746845910804	2.4619142955696772E-5	1495.3438883225117	177.54522854187528	1.495914194897711	2.3526446106047505	0.5161378245232159	-0.0010523753090955282
533	0.0050	1.0	1.0	6.0	1.0	4.0	2.0	0.1	true	0.9	0.0	true	1.0	1.0	0.0010	1.0E-4	2.0	5.0	1.0	ContinuousCorrelated	Kinesis	true	0.0	1.0	PoissonProcess	1000	0	1	land1047.csv	0	2040447071	true	500	0.5	0	5.0	1.0	0.01	1.0	false	0.0	0.2108312849957177	9.019567636963251E-6	1098.9173406653915	52.38119268431812	1.099493912523973	1.9696964888115698	0.501495752709675	-0.0012441287045992454
534	0.0050	1.0	1.0	6.0	1.0	4.0	2.0	0.1	true	0.9	0.0	true	1.0	1.0	0.0010	1.0E-4	2.0	5.0	1.0	ContinuousCorrelated	Kinesis	true	0.0	1.0	PoissonProcess	1000	0	1	land1098.csv	0	2040450277	true	500	0.5	0	5.0	1.0	0.01	1.0	false	0.0	0.5067517086292984	7.354495938423964E-5	1507.4824411409081	57.64510595106896	1.5080630295151214	2.450263707549718	0.5099822453697499	0.004655737078181788
535	0.0050	1.0	1.0	6.0	1.0	4.0	2.0	0.1	true	0.9	0.0	true	1.0	1.0	0.0010	1.0E-4	2.0	5.0	1.0	ContinuousCorrelated	Kinesis	true	0.0	1.0	PoissonProcess	1000	0	1	land1100.csv	0	2040453171	true	500	0.5	0	5.0	1.0	0.01	1.0	false	0.0	0.338865163539225	3.409786101810974E-5	1136.7842413124672	62.38071784420265	1.13735762851257	2.109487899275493	0.4938484265101277	8.199704842829405E-4
536	0.0050	1.0	1.0	6.0	1.0	4.0	2.0	0.1	true	0.9	0.0	true	1.0	1.0	0.0010	1.0E-4	2.0	5.0	1.0	ContinuousCorrelated	Kinesis	true	0.0	1.0	PoissonProcess	1000	0	1	land1103.csv	0	2040456280	true	500	0.5	0	5.0	1.0	0.01	1.0	false	0.0	0.1809992299145035	9.094506617480648E-6	1342.5234821331874	103.02546233301622	1.3431092158089368	2.1575731129583215	0.49029799085108855	-0.0016358900147837978
537	0.0050	1.0	1.0	6.0	1.0	4.0	2.0	0.1	true	0.9	0.0	true	1.0	1.0	0.0010	1.0E-4	2.0	5.0	1.0	ContinuousCorrelated	Kinesis	true	0.0	1.0	PoissonProcess	1000	0	1	land1162.csv	0	2040459474	true	500	0.5	0	5.0	1.0	0.01	1.0	false	0.0	0.4828466169363536	7.760316691203948E-5	1514.5553485100788	62.1711797230045	1.5151546113765606	2.426921823145005	0.522248307856844	-0.007819663500298826
538	0.0050	1.0	1.0	6.0	1.0	4.0	2.0	0.1	true	0.9	0.0	true	1.0	1.0	0.0010	1.0E-4	2.0	5.0	1.0	ContinuousCorrelated	Kinesis	true	0.0	1.0	PoissonProcess	1000	0	1	land1164.csv	0	2040462271	true	500	0.5	0	5.0	1.0	0.01	1.0	false	0.0	0.43501388527719004	6.245801155815221E-5	1302.5878435765849	41.6096684681022	1.3031815930794581	2.2194268355141564	0.4935928885661524	-0.004313643302841683
539	0.0050	1.0	1.0	6.0	1.0	4.0	2.0	0.1	true	0.9	0.0	true	1.0	1.0	0.0010	1.0E-4	2.0	5.0	1.0	ContinuousCorrelated	Kinesis	true	0.0	1.0	PoissonProcess	1000	0	1	land1167.csv	0	2040465067	true	500	0.5	0	5.0	1.0	0.01	1.0	false	0.0	0.18268311121571154	1.0170118025077302E-5	1291.9848918494126	129.9256580255832	1.292574769796602	2.1594595192462394	0.5179432354938571	-0.002284206886183739
540	0.0050	1.0	1.0	6.0	1.0	4.0	2.0	0.1	true	0.9	0.0	true	1.0	1.0	0.0010	1.0E-4	2.0	5.0	1.0	ContinuousCorrelated	Kinesis	true	0.0	1.0	PoissonProcess	1000	0	1	land1218.csv	0	2040468173	true	500	0.5	0	5.0	1.0	0.01	1.0	false	0.0	0.2625948947313712	4.917021146742099E-5	1670.1564371482466	69.68330097035955	1.6707272808175215	2.3008208950388385	0.5294022438684372	-0.0016907875026622402
541	0.0050	1.0	1.0	6.0	1.0	4.0	2.0	0.1	true	0.9	0.0	true	1.0	1.0	0.0010	1.0E-4	2.0	5.0	1.0	ContinuousCorrelated	Kinesis	true	0.0	1.0	PoissonProcess	1000	0	1	land1220.csv	0	2040471062	true	500	0.5	0	5.0	1.0	0.01	1.0	false	0.0	0.26082942361062844	2.0328977139095958E-5	1032.6623998113212	41.91230842183045	1.0332622798179445	1.9962771639417178	0.48067300258860235	-0.007976196274084194
542	0.0050	1.0	1.0	6.0	1.0	4.0	2.0	0.1	true	0.9	0.0	true	1.0	1.0	0.0010	1.0E-4	2.0	5.0	1.0	ContinuousCorrelated	Kinesis	true	0.0	1.0	PoissonProcess	1000	0	1	land1223.csv	0	2040474284	true	500	0.5	0	5.0	1.0	0.01	1.0	false	0.0	0.20377203193248056	9.319377970478538E-6	1169.0208043101813	146.69757194026087	1.1695931573842917	2.1130620159476834	0.5204407151992195	-0.0022551304976819045
543	0.0050	1.0	1.0	6.0	1.0	4.0	2.0	0.1	true	0.9	0.0	true	1.0	1.0	0.0010	1.0E-4	2.0	5.0	1.0	ContinuousCorrelated	Kinesis	true	0.0	1.0	PoissonProcess	1000	0	1	land1282.csv	0	2040477448	true	500	0.5	0	5.0	1.0	0.01	1.0	false	0.0	0.18330074755826392	3.053279021202198E-5	1837.3681195303816	63.65823908551038	1.8379475919046262	2.4726162477491345	0.5167806365179953	0.0010218119914772942
544	0.0050	1.0	1.0	6.0	1.0	4.0	2.0	0.1	true	0.9	0.0	true	1.0	1.0	0.0010	1.0E-4	2.0	5.0	1.0	ContinuousCorrelated	Kinesis	true	0.0	1.0	PoissonProcess	1000	0	1	land1284.csv	0	2040480337	true	500	0.5	0	5.0	1.0	0.01	1.0	false	0.0	0.24272042610398017	1.4858798365214664E-5	1014.4429991009027	54.6158028034499	1.015040880175036	2.0000740326425843	0.5032906373112565	1.1551183635720148E-4
545	0.0050	1.0	1.0	6.0	1.0	4.0	2.0	0.1	true	0.9	0.0	true	1.0	1.0	0.0010	1.0E-4	2.0	5.0	1.0	ContinuousCorrelated	Kinesis	true	0.0	1.0	PoissonProcess	1000	0	1	land1287.csv	0	2040483496	true	500	0.5	0	5.0	1.0	0.01	1.0	false	0.0	0.19253253973252302	1.3641231898176818E-5	1278.9336880559613	80.56980095201351	1.2795202835474246	2.152311106400165	0.5227539315444149	-0.004095036067578922
546	0.0050	1.0	1.0	6.0	1.0	4.0	2.0	0.1	true	0.9	0.0	true	1.0	1.0	0.0010	1.0E-4	2.0	5.0	1.0	ContinuousCorrelated	Kinesis	true	0.0	1.0	PoissonProcess	1000	0	1	land1338.csv	0	2040486733	true	500	0.5	0	5.0	1.0	0.01	1.0	false	0.0	0.3535066504803929	6.66458051996988E-5	1564.4108252161004	78.68773470239091	1.5649844502591155	2.3743316018789393	0.4833335840756205	0.002336509653386639
547	0.0050	1.0	1.0	6.0	1.0	4.0	2.0	0.1	true	0.9	0.0	true	1.0	1.0	0.0010	1.0E-4	2.0	5.0	1.0	ContinuousCorrelated	Kinesis	true	0.0	1.0	PoissonProcess	1000	0	1	land1340.csv	0	2040489607	true	500	0.5	0	5.0	1.0	0.01	1.0	false	0.0	0.26994842732443336	2.352678299555025E-5	1155.869277886119	96.67699263826448	1.156464817728516	2.238745895158475	0.5057097423482996	1.0467883394043134E-4
548	0.0050	1.0	1.0	6.0	1.0	4.0	2.0	0.1	true	0.9	0.0	true	1.0	1.0	0.0010	1.0E-4	2.0	5.0	1.0	ContinuousCorrelated	Kinesis	true	0.0	1.0	PoissonProcess	1000	0	1	land1343.csv	0	2040492695	true	500	0.5	0	5.0	1.0	0.01	1.0	false	0.0	0.17767707270130845	8.392233931387494E-6	1423.3869465051932	135.68025197627367	1.4239616572586236	2.3084541675979655	0.5183458689957797	0.001067052103615906
549	0.0050	1.0	1.0	6.0	1.0	4.0	2.0	0.1	true	0.9	0.0	true	1.0	1.0	0.0010	1.0E-4	2.0	5.0	1.0	ContinuousCorrelated	Kinesis	true	0.0	1.0	PoissonProcess	1000	0	1	land1402.csv	0	2040495871	true	500	0.5	0	5.0	1.0	0.01	1.0	false	0.0	0.2703805969146083	9.485482249083573E-5	1974.6749704905037	129.7074528767496	1.9752674017426821	2.3039807994672943	0.4767801450781499	-0.0019712631937595466
550	0.0050	1.0	1.0	6.0	1.0	4.0	2.0	0.1	true	0.9	0.0	true	1.0	1.0	0.0010	1.0E-4	2.0	5.0	1.0	ContinuousCorrelated	Kinesis	true	0.0	1.0	PoissonProcess	1000	0	1	land1404.csv	0	2040498606	true	500	0.5	0	5.0	1.0	0.01	1.0	false	0.0	0.24316390611858696	3.2487917413665444E-5	1549.311893778866	150.60798889865725	1.5498934272901934	2.428997412313357	0.4969007419327687	-6.595347018753065E-4
551	0.0050	1.0	1.0	6.0	1.0	4.0	2.0	0.1	true	0.9	0.0	true	1.0	1.0	0.0010	1.0E-4	2.0	5.0	1.0	ContinuousCorrelated	Kinesis	true	0.0	1.0	PoissonProcess	1000	0	1	land1407.csv	0	2040501591	true	500	0.5	0	5.0	1.0	0.01	1.0	false	0.0	0.20262394843620807	1.1060183941654332E-5	1261.3105595820577	56.463872254684894	1.2618927848800383	2.1377120568855403	0.5499323759473577	0.002281385330073567
552	0.0050	1.0	1.0	6.0	1.0	4.0	2.0	0.1	true	0.9	0.0	true	1.0	1.0	0.0010	1.0E-4	2.0	5.0	1.0	ContinuousCorrelated	Kinesis	true	0.0	1.0	PoissonProcess	1000	0	1	land1458.csv	0	2040504745	true	500	0.5	0	5.0	1.0	0.01	1.0	false	0.0	0.3534121998437868	5.9652876351015055E-5	1500.811481779969	87.69992803076268	1.5014035975992785	2.331671980262322	0.49235345420328513	0.0015690536460760342
553	0.0050	1.0	1.0	6.0	1.0	4.0	2.0	0.1	true	0.9	0.0	true	1.0	1.0	0.0010	1.0E-4	2.0	5.0	1.0	ContinuousCorrelated	Kinesis	true	0.0	1.0	PoissonProcess	1000	0	1	land1460.csv	0	2040507629	true	500	0.5	0	5.0	1.0	0.01	1.0	false	0.0	0.199204480865854	2.051684956782447E-5	1514.3757259607205	84.93111021328251	1.5149460369842522	2.346288429933332	0.537449454848305	0.003823194134951203
554	0.0050	1.0	1.0	6.0	1.0	4.0	2.0	0.1	true	0.9	0.0	true	1.0	1.0	0.0010	1.0E-4	2.0	5.0	1.0	ContinuousCorrelated	Kinesis	true	0.0	1.0	PoissonProcess	1000	0	1	land1463.csv	0	2040510800	true	500	0.5	0	5.0	1.0	0.01	1.0	false	0.0	0.18370475312772877	8.28574310548859E-6	1307.488677015668	559.7556408256078	1.3080878906130056	2.211113005773901	0.5111410269318523	0.008270788896302736
555	0.0050	1.0	1.0	6.0	1.0	4.0	2.0	0.1	true	0.9	0.0	true	1.0	1.0	0.0010	1.0E-4	2.0	5.0	1.0	ContinuousCorrelated	Kinesis	true	0.0	1.0	PoissonProcess	1000	0	1	land1522.csv	0	2040513982	true	500	0.5	0	5.0	1.0	0.01	1.0	false	0.0	0.1741543159002051	4.019206613663805E-5	1898.183207832756	72.81855272123647	1.8987801114446528	2.358772721626633	0.49946548564450227	1.5254193341511589E-4
556	0.0050	1.0	1.0	6.0	1.0	4.0	2.0	0.1	true	0.9	0.0	true	1.0	1.0	0.0010	1.0E-4	2.0	5.0	1.0	ContinuousCorrelated	Kinesis	true	0.0	1.0	PoissonProcess	1000	0	1	land1524.csv	0	2040516923	true	500	0.5	0	5.0	1.0	0.01	1.0	false	0.0	0.16562054131198936	1.7819577454135307E-5	1560.3550552814527	121.00047972644694	1.5609371644987715	2.276149722786364	0.5240366451587442	0.005714690621321344
557	0.0050	1.0	1.0	6.0	1.0	4.0	2.0	0.1	true	0.9	0.0	true	1.0	1.0	0.0010	1.0E-4	2.0	5.0	1.0	ContinuousCorrelated	Kinesis	true	0.0	1.0	PoissonProcess	1000	0	1	land1527.csv	0	2040520080	true	500	0.5	0	5.0	1.0	0.01	1.0	false	0.0	0.1931651489935712	1.2935432478386286E-5	1406.621753564992	262.5366662848591	1.407221376853784	2.4311835592576867	0.5035439086479357	1.5146445277043152E-4
558	0.0050	1.0	1.0	6.0	1.0	4.0	2.0	0.1	true	0.9	0.0	true	1.0	1.0	0.0010	1.0E-4	2.0	5.0	1.0	ContinuousCorrelated	Kinesis	true	0.0	1.0	PoissonProcess	1000	0	1	land1578.csv	0	2040523214	true	500	0.5	0	5.0	1.0	0.01	1.0	false	0.0	0.2987501247759045	5.981502458274174E-5	1589.7136291238653	122.60588058346681	1.590289178635861	2.2360058318384746	0.5122560902404515	-0.004570058611560409
559	0.0050	1.0	1.0	6.0	1.0	4.0	2.0	0.1	true	0.9	0.0	true	1.0	1.0	0.0010	1.0E-4	2.0	5.0	1.0	ContinuousCorrelated	Kinesis	true	0.0	1.0	PoissonProcess	1000	0	1	land1580.csv	0	2040526097	true	500	0.5	0	5.0	1.0	0.01	1.0	false	0.0	0.2497970243466714	2.5037935974989328E-5	1265.8210565173047	57.3057288532839	1.266409073215446	2.1613949049025867	0.5040137351115941	0.002252247693426229
560	0.0050	1.0	1.0	6.0	1.0	4.0	2.0	0.1	true	0.9	0.0	true	1.0	1.0	0.0010	1.0E-4	2.0	5.0	1.0	ContinuousCorrelated	Kinesis	true	0.0	1.0	PoissonProcess	1000	0	1	land1583.csv	0	2040529219	true	500	0.5	0	5.0	1.0	0.01	1.0	false	0.0	0.19717861627909092	8.566094688356701E-6	1256.6364240136638	59.4420761128793	1.2572182803326515	2.267430918172819	0.5379109081742495	0.00273219764790415
561	0.0050	1.0	1.0	6.0	1.0	4.0	2.0	0.1	true	0.9	0.0	true	1.0	1.0	0.0010	1.0E-4	2.0	5.0	1.0	ContinuousCorrelated	Kinesis	true	0.0	1.0	PoissonProcess	1000	0	1	land1642.csv	0	2040532317	true	500	0.5	0	5.0	1.0	0.01	1.0	false	0.0	0.11012650086927868	3.6954836344240315E-5	2074.6058456820197	252.34282920437417	2.0751885310325786	2.3422107087579858	0.449778549116536	0.002496784920171546
562	0.0050	1.0	1.0	6.0	1.0	4.0	2.0	0.1	true	0.9	0.0	true	1.0	1.0	0.0010	1.0E-4	2.0	5.0	1.0	ContinuousCorrelated	Kinesis	true	0.0	1.0	PoissonProcess	1000	0	1	land1644.csv	0	2040535108	true	500	0.5	0	5.0	1.0	0.01	1.0	false	0.0	0.21886092300903834	2.887667364210244E-5	1441.4028374635884	62.934387555607444	1.4420015428601658	2.1574892832533217	0.49395117492235	-0.002892423697017039
563	0.0050	1.0	1.0	6.0	1.0	4.0	2.0	0.1	true	0.9	0.0	true	1.0	1.0	0.0010	1.0E-4	2.0	5.0	1.0	ContinuousCorrelated	Kinesis	true	0.0	1.0	PoissonProcess	1000	0	1	land1647.csv	0	2040538030	true	500	0.5	0	5.0	1.0	0.01	1.0	false	0.0	0.1712612843888809	5.591686571060414E-6	1482.109585754153	368.085414204223	1.4826811236871196	2.22239474712324	0.48963854324382466	-0.0015409492226611458
564	0.0050	1.0	1.0	6.0	1.0	4.0	2.0	0.1	true	0.9	0.0	true	1.0	1.0	0.0010	1.0E-4	2.0	5.0	1.0	ContinuousCorrelated	Kinesis	true	0.0	1.0	PoissonProcess	1000	0	1	land1698.csv	0	2040541231	true	500	0.5	0	5.0	1.0	0.01	1.0	false	0.0	0.18793334820046145	3.224252479915695E-5	1722.365608431718	91.16257339408637	1.7229422045290104	2.3240068330873878	0.46081827586984453	-8.28271283516986E-4
565	0.0050	1.0	1.0	6.0	1.0	4.0	2.0	0.1	true	0.9	0.0	true	1.0	1.0	0.0010	1.0E-4	2.0	5.0	1.0	ContinuousCorrelated	Kinesis	true	0.0	1.0	PoissonProcess	1000	0	1	land1700.csv	0	2040544010	true	500	0.5	0	5.0	1.0	0.01	1.0	false	0.0	0.2507563146024321	2.9349802342600748E-5	1323.3502519311285	75.42618936847998	1.3239202559359127	2.189544526810953	0.5090470100665475	-0.001968915334056076
566	0.0050	1.0	1.0	6.0	1.0	4.0	2.0	0.1	true	0.9	0.0	true	1.0	1.0	0.0010	1.0E-4	2.0	5.0	1.0	ContinuousCorrelated	Kinesis	true	0.0	1.0	PoissonProcess	1000	0	1	land1703.csv	0	2040547070	true	500	0.5	0	5.0	1.0	0.01	1.0	false	0.0	0.1892187023096324	8.268179511403524E-6	1303.5195189559195	71.20874286370447	1.3041073059294717	2.263687620694917	0.4784219188057041	-0.0022981393355309765
567	0.0050	1.0	1.0	6.0	1.0	4.0	2.0	0.1	true	0.9	0.0	true	1.0	1.0	0.0010	1.0E-4	2.0	5.0	1.0	ContinuousCorrelated	Kinesis	true	0.0	1.0	PoissonProcess	1000	0	1	land1762.csv	0	2040550258	true	500	0.5	0	5.0	1.0	0.01	1.0	false	0.0	0.3334631790025565	6.878879439170387E-5	1831.4877752372963	97.46864247789235	1.8320579258304748	2.4319377232343444	0.5245297823635325	0.0028322908942753793
568	0.0050	1.0	1.0	6.0	1.0	4.0	2.0	0.1	true	0.9	0.0	true	1.0	1.0	0.0010	1.0E-4	2.0	5.0	1.0	ContinuousCorrelated	Kinesis	true	0.0	1.0	PoissonProcess	1000	0	1	land1764.csv	0	2040553114	true	500	0.5	0	5.0	1.0	0.01	1.0	false	0.0	0.2102093417507802	2.136088792221552E-5	1346.9747296888509	91.17971296640336	1.3475506319271315	2.200430955954624	0.48713179157638764	-8.639525947893243E-4
569	0.0050	1.0	1.0	6.0	1.0	4.0	2.0	0.1	true	0.9	0.0	true	1.0	1.0	0.0010	1.0E-4	2.0	5.0	1.0	ContinuousCorrelated	Kinesis	true	0.0	1.0	PoissonProcess	1000	0	1	land1767.csv	0	2040556261	true	500	0.5	0	5.0	1.0	0.01	1.0	false	0.0	0.22821501945529912	1.2409475371284136E-5	1029.841988777236	39.45579730051817	1.0304411701372942	2.0794250610869947	0.48909169093888216	0.004590425301626135
570	0.0050	1.0	1.0	6.0	1.0	4.0	2.0	0.1	true	0.9	0.0	true	1.0	1.0	0.0010	1.0E-4	2.0	5.0	1.0	ContinuousCorrelated	Kinesis	true	0.0	1.0	PoissonProcess	1000	0	1	land1818.csv	0	2040559337	true	500	0.5	0	5.0	1.0	0.01	1.0	false	0.0	0.2865083118203068	5.261521495822032E-5	1676.498202009942	161.5506414414859	1.6770971856567503	2.4670551420019864	0.5131645747370043	-0.0019330985403062141
571	0.0050	1.0	1.0	6.0	1.0	4.0	2.0	0.1	true	0.9	0.0	true	1.0	1.0	0.0010	1.0E-4	2.0	5.0	1.0	ContinuousCorrelated	Kinesis	true	0.0	1.0	PoissonProcess	1000	0	1	land1820.csv	0	2040562165	true	500	0.5	0	5.0	1.0	0.01	1.0	false	0.0	0.24557549978899004	2.1568533862644248E-5	1331.5089438809032	75.19142071323618	1.3320791818784394	2.400369059480071	0.50657385011714	-5.031219395228761E-4
572	0.0050	1.0	1.0	6.0	1.0	4.0	2.0	0.1	true	0.9	0.0	true	1.0	1.0	0.0010	1.0E-4	2.0	5.0	1.0	ContinuousCorrelated	Kinesis	true	0.0	1.0	PoissonProcess	1000	0	1	land1823.csv	0	2040565329	true	500	0.5	0	5.0	1.0	0.01	1.0	false	0.0	0.19705990753104857	8.701557071996976E-6	1270.734404344087	302.8585152927767	1.2713280483781615	2.2526899357853223	0.5656315080611307	0.0014287248832070922
573	0.0050	1.0	1.0	6.0	1.0	4.0	2.0	0.1	true	0.9	0.0	true	1.0	1.0	0.0010	1.0E-4	2.0	5.0	1.0	ContinuousCorrelated	Kinesis	true	0.0	1.0	PoissonProcess	1000	0	1	land1882.csv	0	2040568598	true	500	0.5	0	5.0	1.0	0.01	1.0	false	0.0	0.46917994723055756	2.1283853330426547E-4	2131.01065294219	143.66352224363968	2.1315808931831017	2.355258287704838	0.509735230594769	0.001248101769799069
574	0.0050	1.0	1.0	6.0	1.0	4.0	2.0	0.1	true	0.9	0.0	true	1.0	1.0	0.0010	1.0E-4	2.0	5.0	1.0	ContinuousCorrelated	Kinesis	true	0.0	1.0	PoissonProcess	1000	0	1	land1884.csv	0	2040571381	true	500	0.5	0	5.0	1.0	0.01	1.0	false	0.0	0.23201947883726684	3.4827313042639686E-5	1658.53805093162	100.8269228893616	1.6591346135174774	2.450020208638234	0.4899567758730318	-8.095697911272623E-4
575	0.0050	1.0	1.0	6.0	1.0	4.0	2.0	0.1	true	0.9	0.0	true	1.0	1.0	0.0010	1.0E-4	2.0	5.0	1.0	ContinuousCorrelated	Kinesis	true	0.0	1.0	PoissonProcess	1000	0	1	land1887.csv	0	2040574377	true	500	0.5	0	5.0	1.0	0.01	1.0	false	0.0	0.17944897523500122	5.896556877437371E-6	1490.6308450766815	108.3744914195043	1.491228356436957	2.260828737683052	0.4997294670970461	-0.0015334672261836156
576	0.0050	1.0	1.0	6.0	1.0	4.0	2.0	0.1	true	0.9	0.0	true	1.0	1.0	0.0010	1.0E-4	2.0	5.0	1.0	ContinuousCorrelated	Kinesis	true	0.0	1.0	PoissonProcess	1000	0	1	land1938.csv	0	2040577502	true	500	0.5	0	5.0	1.0	0.01	1.0	false	0.0	0.241831408503069	4.979167692150925E-5	1743.285668941484	70.63525804394236	1.7438827568570339	2.304363416971639	0.47690772699900574	0.0054043708408430735
577	0.0050	1.0	1.0	6.0	1.0	4.0	2.0	0.1	true	0.9	0.0	true	1.0	1.0	0.0010	1.0E-4	2.0	5.0	1.0	ContinuousCorrelated	Kinesis	true	0.0	1.0	PoissonProcess	1000	0	1	land1940.csv	0	2040580371	true	500	0.5	0	5.0	1.0	0.01	1.0	false	0.0	0.26827207004978204	2.713035556265918E-5	1321.9389481941168	87.2892167183195	1.3225365803716589	2.2627741943595434	0.5222380707240685	-0.0015678375381044793
578	0.0050	1.0	1.0	6.0	1.0	4.0	2.0	0.1	true	0.9	0.0	true	1.0	1.0	0.0010	1.0E-4	2.0	5.0	1.0	ContinuousCorrelated	Kinesis	true	0.0	1.0	PoissonProcess	1000	0	1	land1943.csv	0	2040583491	true	500	0.5	0	5.0	1.0	0.01	1.0	false	0.0	0.194631675054218	1.026495465090374E-5	1240.587004737192	57.61432729192108	1.2411857665338522	2.101021924344949	0.5233409008383452	3.2063784113429484E-4
579	0.0050	1.0	1.0	6.0	1.0	4.0	2.0	0.1	true	0.9	0.0	true	1.0	1.0	0.0010	1.0E-4	2.0	5.0	1.0	ContinuousCorrelated	Kinesis	true	0.0	1.0	PoissonProcess	1000	0	1	land2002.csv	0	2040586707	true	500	0.5	0	5.0	1.0	0.01	1.0	false	0.0	0.42921922176021193	1.2321295974069283E-4	2054.9097902098197	113.73770652459592	2.0555067436123386	2.5498398345918654	0.518890405752403	-0.0026873029566066645
580	0.0050	1.0	1.0	6.0	1.0	4.0	2.0	0.1	true	0.9	0.0	true	1.0	1.0	0.0010	1.0E-4	2.0	5.0	1.0	ContinuousCorrelated	Kinesis	true	0.0	1.0	PoissonProcess	1000	0	1	land2004.csv	0	2040589490	true	500	0.5	0	5.0	1.0	0.01	1.0	false	0.0	0.3971748552166505	9.553146042420281E-5	1878.4877120423262	398.6293932773121	1.8790577271687448	2.423584929786066	0.4912669645010332	-0.004183042457373584
581	0.0050	1.0	1.0	6.0	1.0	4.0	2.0	0.1	true	0.9	0.0	true	1.0	1.0	0.0010	1.0E-4	2.0	5.0	1.0	ContinuousCorrelated	Kinesis	true	0.0	1.0	PoissonProcess	1000	0	1	land2007.csv	0	2040592250	true	500	0.5	0	5.0	1.0	0.01	1.0	false	0.0	0.18397203125830464	8.837703827680287E-6	1231.6631987355975	46.63231471465404	1.2322467683677134	2.026129615831746	0.5105075320897945	-0.0015909055089304439
582	0.0050	1.0	1.0	6.0	1.0	4.0	2.0	0.1	true	0.9	0.0	true	1.0	1.0	0.0010	1.0E-4	2.0	5.0	1.0	ContinuousCorrelated	Kinesis	true	0.0	1.0	PoissonProcess	1000	0	1	land2058.csv	0	2040595493	true	500	0.5	0	5.0	1.0	0.01	1.0	false	0.0	0.3330003396535727	5.7891805464444313E-5	1571.76877846977	106.91532030431152	1.572347680006888	2.2775678165510405	0.5215415801363051	0.0047855039425437436
583	0.0050	1.0	1.0	6.0	1.0	4.0	2.0	0.1	true	0.9	0.0	true	1.0	1.0	0.0010	1.0E-4	2.0	5.0	1.0	ContinuousCorrelated	Kinesis	true	0.0	1.0	PoissonProcess	1000	0	1	land2060.csv	0	2040598361	true	500	0.5	0	5.0	1.0	0.01	1.0	false	0.0	0.2517695146757626	2.2263170524550867E-5	1214.7791099235803	67.82610876492501	1.2153518119446665	2.18137799374687	0.5019166206554196	0.002993680877938059
584	0.0050	1.0	1.0	6.0	1.0	4.0	2.0	0.1	true	0.9	0.0	true	1.0	1.0	0.0010	1.0E-4	2.0	5.0	1.0	ContinuousCorrelated	Kinesis	true	0.0	1.0	PoissonProcess	1000	0	1	land2063.csv	0	2040601375	true	500	0.5	0	5.0	1.0	0.01	1.0	false	0.0	0.18200915550581806	7.718866236451008E-6	1363.0812465508272	82.41046125089224	1.363681244136042	2.253540536886647	0.5199358364179033	-0.0041106734106900284
585	0.0050	1.0	1.0	6.0	1.0	4.0	2.0	0.1	true	0.9	0.0	true	1.0	1.0	0.0010	1.0E-4	2.0	5.0	1.0	ContinuousCorrelated	Kinesis	true	0.0	1.0	PoissonProcess	1000	0	1	land2122.csv	0	2040604390	true	500	0.5	0	5.0	1.0	0.01	1.0	false	0.0	0.13155101119566126	6.061091554924639E-5	2242.392772488933	98.28356836720168	2.242991595085899	2.4176784647750917	0.5730441491553314	0.0015409936291988244
586	0.0050	1.0	1.0	6.0	1.0	4.0	2.0	0.1	true	0.9	0.0	true	1.0	1.0	0.0010	1.0E-4	2.0	5.0	1.0	ContinuousCorrelated	Kinesis	true	0.0	1.0	PoissonProcess	1000	0	1	land2124.csv	0	2040607219	true	500	0.5	0	5.0	1.0	0.01	1.0	false	0.0	0.11491388287169353	3.022353161129373E-5	2017.8345236089267	65.97642530637032	2.0184192540230117	2.328762906307118	0.5513078531335437	0.005418774204772983
587	0.0050	1.0	1.0	6.0	1.0	4.0	2.0	0.1	true	0.9	0.0	true	1.0	1.0	0.0010	1.0E-4	2.0	5.0	1.0	ContinuousCorrelated	Kinesis	true	0.0	1.0	PoissonProcess	1000	0	1	land2127.csv	0	2040610108	true	500	0.5	0	5.0	1.0	0.01	1.0	false	0.0	0.2148655398409436	9.894071371770482E-6	1072.2042424626545	49.23190363261404	1.0728027479228075	2.1712123765946734	0.5197169192621449	2.374977590726971E-4
588	0.0050	1.0	1.0	6.0	1.0	4.0	2.0	0.1	true	0.9	0.0	true	1.0	1.0	0.0010	1.0E-4	2.0	5.0	1.0	ContinuousCorrelated	Kinesis	true	0.0	1.0	PoissonProcess	1000	0	1	land2178.csv	0	2040613179	true	500	0.5	0	5.0	1.0	0.01	1.0	false	0.0	0.3207460274650558	5.746340048221334E-5	1558.669168801236	125.68562877056935	1.5592436317045082	2.2741402640510255	0.5146112649210178	0.002831202378501003
589	0.0050	1.0	1.0	6.0	1.0	4.0	2.0	0.1	true	0.9	0.0	true	1.0	1.0	0.0010	1.0E-4	2.0	5.0	1.0	ContinuousCorrelated	Kinesis	true	0.0	1.0	PoissonProcess	1000	0	1	land2180.csv	0	2040616045	true	500	0.5	0	5.0	1.0	0.01	1.0	false	0.0	0.22977494545075122	2.03510067378584E-5	1387.7439637239352	121.6043044165994	1.3883179815467042	2.4104855790259063	0.5214306954938318	0.0013808718803215597
590	0.0050	1.0	1.0	6.0	1.0	4.0	2.0	0.1	true	0.9	0.0	true	1.0	1.0	0.0010	1.0E-4	2.0	5.0	1.0	ContinuousCorrelated	Kinesis	true	0.0	1.0	PoissonProcess	1000	0	1	land2183.csv	0	2040619179	true	500	0.5	0	5.0	1.0	0.01	1.0	false	0.0	0.16989960055716946	8.139154209930656E-6	1438.7334364946962	61.753418087107185	1.4393035687639477	2.133539841823959	0.5061693001924242	0.006822481873885724
591	0.0050	1.0	1.0	6.0	1.0	4.0	2.0	0.1	true	0.9	0.0	true	1.0	1.0	0.0010	1.0E-4	2.0	5.0	1.0	ContinuousCorrelated	Kinesis	true	0.0	1.0	PoissonProcess	1000	0	1	land2242.csv	0	2040622271	true	500	0.5	0	5.0	1.0	0.01	1.0	false	0.0	0.5506622733034273	1.4553274061179417E-4	1838.9177974848114	97.81298440634828	1.8395101761513	2.413227977318767	0.513500158883451	8.652391902330802E-4
592	0.0050	1.0	1.0	6.0	1.0	4.0	2.0	0.1	true	0.9	0.0	true	1.0	1.0	0.0010	1.0E-4	2.0	5.0	1.0	ContinuousCorrelated	Kinesis	true	0.0	1.0	PoissonProcess	1000	0	1	land2244.csv	0	2040625000	true	500	0.5	0	5.0	1.0	0.01	1.0	false	0.0	0.2321875709916854	3.061572458978041E-5	1530.802018531337	84.5279173662618	1.5313724202426033	2.411035724196812	0.5217245043638951	9.603840080851514E-4
593	0.0050	1.0	1.0	6.0	1.0	4.0	2.0	0.1	true	0.9	0.0	true	1.0	1.0	0.0010	1.0E-4	2.0	5.0	1.0	ContinuousCorrelated	Kinesis	true	0.0	1.0	PoissonProcess	1000	0	1	land2247.csv	0	2040627993	true	500	0.5	0	5.0	1.0	0.01	1.0	false	0.0	0.17177779030766194	8.12561270929882E-6	1491.8709690658648	85.10718850677395	1.4924440063898097	2.1899867737482945	0.5111834828734884	-3.111936194105437E-4
594	0.0050	1.0	1.0	6.0	1.0	4.0	2.0	0.1	true	0.9	0.0	true	1.0	1.0	0.0010	1.0E-4	2.0	5.0	1.0	ContinuousCorrelated	Kinesis	true	0.0	1.0	PoissonProcess	1000	0	1	land2298.csv	0	2040631113	true	500	0.5	0	5.0	1.0	0.01	1.0	false	0.0	0.44148862154119545	6.916349017931276E-5	1440.3192472145836	374.3205349689029	1.440891337742692	2.2794112961007116	0.5328585813370792	0.00356423015849048
595	0.0050	1.0	1.0	6.0	1.0	4.0	2.0	0.1	true	0.9	0.0	true	1.0	1.0	0.0010	1.0E-4	2.0	5.0	1.0	ContinuousCorrelated	Kinesis	true	0.0	1.0	PoissonProcess	1000	0	1	land2300.csv	0	2040634084	true	500	0.5	0	5.0	1.0	0.01	1.0	false	0.0	0.27906155616545975	2.4434136065734797E-5	1148.3723777336081	130.09224543091395	1.1489717856235622	2.218252624838275	0.5041121323491472	-0.0014706481958252557
596	0.0050	1.0	1.0	6.0	1.0	4.0	2.0	0.1	true	0.9	0.0	true	1.0	1.0	0.0010	1.0E-4	2.0	5.0	1.0	ContinuousCorrelated	Kinesis	true	0.0	1.0	PoissonProcess	1000	0	1	land2303.csv	0	2040637280	true	500	0.5	0	5.0	1.0	0.01	1.0	false	0.0	0.1857364622408498	8.003094887078778E-6	1317.0045267094972	54.747308441910675	1.3175748370420182	2.2370015285819043	0.4860461076337395	-0.0029101549781094154
597	0.0050	1.0	1.0	6.0	1.0	4.0	2.0	0.1	true	0.9	0.0	true	1.0	1.0	0.0010	1.0E-4	2.0	5.0	1.0	ContinuousCorrelated	Kinesis	true	0.0	1.0	PoissonProcess	1000	0	1	land2362.csv	0	2040640443	true	500	0.5	0	5.0	1.0	0.01	1.0	false	0.0	0.46126691977075573	6.755065020002857E-5	1304.3853486532246	71.25592919103207	1.3049610941270064	2.1903062099152937	0.5428460018983701	0.0029351218720984162
598	0.0050	1.0	1.0	6.0	1.0	4.0	2.0	0.1	true	0.9	0.0	true	1.0	1.0	0.0010	1.0E-4	2.0	5.0	1.0	ContinuousCorrelated	Kinesis	true	0.0	1.0	PoissonProcess	1000	0	1	land2364.csv	0	2040643298	true	500	0.5	0	5.0	1.0	0.01	1.0	false	0.0	0.29798636203204515	5.6537846932361026E-5	1604.1050365098129	125.68795712175591	1.6046979909921002	2.2528334192796327	0.5086584238879968	-0.0017101124225180498
599	0.0050	1.0	1.0	6.0	1.0	4.0	2.0	0.1	true	0.9	0.0	true	1.0	1.0	0.0010	1.0E-4	2.0	5.0	1.0	ContinuousCorrelated	Kinesis	true	0.0	1.0	PoissonProcess	1000	0	1	land2367.csv	0	2040646271	true	500	0.5	0	5.0	1.0	0.01	1.0	false	0.0	0.20051232191570392	8.201851198353266E-6	1104.9397314182022	73.02846511013965	1.105516124239373	1.954750467652019	0.5262654492960158	2.9836967515767708E-5
600	0.0050	1.0	1.0	6.0	1.0	4.0	2.0	0.1	true	0.9	0.0	true	1.0	1.0	0.0010	1.0E-4	2.0	5.0	1.0	ContinuousCorrelated	SingleState	true	0.0	1.0	PoissonProcess	1000	0	1	land18.csv	0	2040649295	true	500	0.5	0	5.0	1.0	0.01	1.0	false	0.0	0.23213972325979806	5.028289807986102E-5	2474.595300530136	92.71967812954809	2.475194110742448	0.0	0.0	0.0024901462466235054
601	0.0050	1.0	1.0	6.0	1.0	4.0	2.0	0.1	true	0.9	0.0	true	1.0	1.0	0.0010	1.0E-4	2.0	5.0	1.0	ContinuousCorrelated	SingleState	true	0.0	1.0	PoissonProcess	1000	0	1	land20.csv	0	2040652144	true	500	0.5	0	5.0	1.0	0.01	1.0	false	0.0	0.20618329581652875	2.6242972666316136E-5	2487.6276459708874	192.5673881944852	2.4881991427061854	0.0	0.0	0.0028042282135861893
602	0.0050	1.0	1.0	6.0	1.0	4.0	2.0	0.1	true	0.9	0.0	true	1.0	1.0	0.0010	1.0E-4	2.0	5.0	1.0	ContinuousCorrelated	SingleState	true	0.0	1.0	PoissonProcess	1000	0	1	land23.csv	0	2040655242	true	500	0.5	0	5.0	1.0	0.01	1.0	false	0.0	0.18259884778254107	1.135708873438408E-5	2445.8354677436546	132.01556995333416	2.4464055730727354	0.0	0.0	0.004601029956220905
603	0.0050	1.0	1.0	6.0	1.0	4.0	2.0	0.1	true	0.9	0.0	true	1.0	1.0	0.0010	1.0E-4	2.0	5.0	1.0	ContinuousCorrelated	SingleState	true	0.0	1.0	PoissonProcess	1000	0	1	land82.csv	0	2040658362	true	500	0.5	0	5.0	1.0	0.01	1.0	false	0.0	0.13773307714159658	6.858725936685163E-5	2660.276711489835	129.0996324902701	2.6608467874657276	0.0	0.0	0.0031911530068044775
604	0.0050	1.0	1.0	6.0	1.0	4.0	2.0	0.1	true	0.9	0.0	true	1.0	1.0	0.0010	1.0E-4	2.0	5.0	1.0	ContinuousCorrelated	SingleState	true	0.0	1.0	PoissonProcess	1000	0	1	land84.csv	0	2040661171	true	500	0.5	0	5.0	1.0	0.01	1.0	false	0.0	0.17400050200569608	2.7322652987119377E-5	2458.077463532775	127.27867264788453	2.458663472510056	0.0	0.0	-0.0018060969328633724
605	0.0050	1.0	1.0	6.0	1.0	4.0	2.0	0.1	true	0.9	0.0	true	1.0	1.0	0.0010	1.0E-4	2.0	5.0	1.0	ContinuousCorrelated	SingleState	true	0.0	1.0	PoissonProcess	1000	0	1	land87.csv	0	2040664215	true	500	0.5	0	5.0	1.0	0.01	1.0	false	0.0	0.1777264866894113	1.2999710840903316E-5	2481.810957104697	153.27674194481958	2.4824075614225953	0.0	0.0	0.0012649291537110813
606	0.0050	1.0	1.0	6.0	1.0	4.0	2.0	0.1	true	0.9	0.0	true	1.0	1.0	0.0010	1.0E-4	2.0	5.0	1.0	ContinuousCorrelated	SingleState	true	0.0	1.0	PoissonProcess	1000	0	1	land138.csv	0	2040667356	true	500	0.5	0	5.0	1.0	0.01	1.0	false	0.0	0.16560630798251927	5.77437069531349E-5	2518.684556475691	87.6035840451816	2.5192545564887285	0.0	0.0	0.003901261789129447
607	0.0050	1.0	1.0	6.0	1.0	4.0	2.0	0.1	true	0.9	0.0	true	1.0	1.0	0.0010	1.0E-4	2.0	5.0	1.0	ContinuousCorrelated	SingleState	true	0.0	1.0	PoissonProcess	1000	0	1	land140.csv	0	2040670212	true	500	0.5	0	5.0	1.0	0.01	1.0	false	0.0	0.16876810263579456	2.4090065136210192E-5	2462.8753391562764	187.84752496612793	2.4634682545969406	0.0	0.0	-0.002582495385198835
608	0.0050	1.0	1.0	6.0	1.0	4.0	2.0	0.1	true	0.9	0.0	true	1.0	1.0	0.0010	1.0E-4	2.0	5.0	1.0	ContinuousCorrelated	SingleState	true	0.0	1.0	PoissonProcess	1000	0	1	land143.csv	0	2040673365	true	500	0.5	0	5.0	1.0	0.01	1.0	false	0.0	0.17500238424250808	1.096597694567957E-5	2534.6558635691777	93.3972347708364	2.5352534694623	0.0	0.0	-0.0016354496515845229
609	0.0050	1.0	1.0	6.0	1.0	4.0	2.0	0.1	true	0.9	0.0	true	1.0	1.0	0.0010	1.0E-4	2.0	5.0	1.0	ContinuousCorrelated	SingleState	true	0.0	1.0	PoissonProcess	1000	0	1	land202.csv	0	2040676537	true	500	0.5	0	5.0	1.0	0.01	1.0	false	0.0	0.2392058058787549	1.2224428960516033E-4	2358.285758700587	183.2392764412057	2.3588595256396907	0.0	0.0	7.5001927481195E-4
610	0.0050	1.0	1.0	6.0	1.0	4.0	2.0	0.1	true	0.9	0.0	true	1.0	1.0	0.0010	1.0E-4	2.0	5.0	1.0	ContinuousCorrelated	SingleState	true	0.0	1.0	PoissonProcess	1000	0	1	land204.csv	0	2040679452	true	500	0.5	0	5.0	1.0	0.01	1.0	false	0.0	0.11793233614815259	2.7026175645711726E-5	2456.6169855282733	134.0940291453627	2.4572083306379486	0.0	0.0	-0.0015379173884742243
611	0.0050	1.0	1.0	6.0	1.0	4.0	2.0	0.1	true	0.9	0.0	true	1.0	1.0	0.0010	1.0E-4	2.0	5.0	1.0	ContinuousCorrelated	SingleState	true	0.0	1.0	PoissonProcess	1000	0	1	land207.csv	0	2040682509	true	500	0.5	0	5.0	1.0	0.01	1.0	false	0.0	0.19437731856227616	1.7151105877291088E-5	2534.605815932755	418.4727729240711	2.5352006343835156	0.0	0.0	-9.384578087677274E-5
612	0.0050	1.0	1.0	6.0	1.0	4.0	2.0	0.1	true	0.9	0.0	true	1.0	1.0	0.0010	1.0E-4	2.0	5.0	1.0	ContinuousCorrelated	SingleState	true	0.0	1.0	PoissonProcess	1000	0	1	land258.csv	0	2040685618	true	500	0.5	0	5.0	1.0	0.01	1.0	false	0.0	0.13341251933528178	4.660293277083727E-5	2411.720322066553	87.96283450063018	2.4123112461236706	0.0	0.0	0.0013887887963113528
613	0.0050	1.0	1.0	6.0	1.0	4.0	2.0	0.1	true	0.9	0.0	true	1.0	1.0	0.0010	1.0E-4	2.0	5.0	1.0	ContinuousCorrelated	SingleState	true	0.0	1.0	PoissonProcess	1000	0	1	land260.csv	0	2040688529	true	500	0.5	0	5.0	1.0	0.01	1.0	false	0.0	0.16921717384676152	2.618945099610397E-5	2510.3788665322354	190.5595120143378	2.510976867674305	0.0	0.0	0.0019293711624954507
614	0.0050	1.0	1.0	6.0	1.0	4.0	2.0	0.1	true	0.9	0.0	true	1.0	1.0	0.0010	1.0E-4	2.0	5.0	1.0	ContinuousCorrelated	SingleState	true	0.0	1.0	PoissonProcess	1000	0	1	land263.csv	0	2040691641	true	500	0.5	0	5.0	1.0	0.01	1.0	false	0.0	0.1915365979597411	1.0474813647178346E-5	2373.0228700801604	101.05522995546416	2.373616728315207	0.0	0.0	-6.783101303691478E-4
615	0.0050	1.0	1.0	6.0	1.0	4.0	2.0	0.1	true	0.9	0.0	true	1.0	1.0	0.0010	1.0E-4	2.0	5.0	1.0	ContinuousCorrelated	SingleState	true	0.0	1.0	PoissonProcess	1000	0	1	land322.csv	0	2040694815	true	500	0.5	0	5.0	1.0	0.01	1.0	false	0.0	0.18814399200500656	5.746165850320208E-5	2374.7204318154945	99.6470456925313	2.375297576346701	0.0	0.0	-1.4614590830045078E-4
616	0.0050	1.0	1.0	6.0	1.0	4.0	2.0	0.1	true	0.9	0.0	true	1.0	1.0	0.0010	1.0E-4	2.0	5.0	1.0	ContinuousCorrelated	SingleState	true	0.0	1.0	PoissonProcess	1000	0	1	land324.csv	0	2040697721	true	500	0.5	0	5.0	1.0	0.01	1.0	false	0.0	0.16818776983704165	3.43789055984349E-5	2264.2735127476176	115.44786246355171	2.264866544569569	0.0	0.0	-0.002172115857647515
617	0.0050	1.0	1.0	6.0	1.0	4.0	2.0	0.1	true	0.9	0.0	true	1.0	1.0	0.0010	1.0E-4	2.0	5.0	1.0	ContinuousCorrelated	SingleState	true	0.0	1.0	PoissonProcess	1000	0	1	land327.csv	0	2040700771	true	500	0.5	0	5.0	1.0	0.01	1.0	false	0.0	0.18284588542323696	8.768866434150454E-6	2455.2898683336853	226.85812288693174	2.455870736359688	0.0	0.0	4.299395431877611E-5
618	0.0050	1.0	1.0	6.0	1.0	4.0	2.0	0.1	true	0.9	0.0	true	1.0	1.0	0.0010	1.0E-4	2.0	5.0	1.0	ContinuousCorrelated	SingleState	true	0.0	1.0	PoissonProcess	1000	0	1	land378.csv	0	2040703865	true	500	0.5	0	5.0	1.0	0.01	1.0	false	0.0	0.13035057955235133	4.5440294435519204E-5	2458.088158977035	122.55966792093578	2.4586620610959162	0.0	0.0	-0.006708602782764589
619	0.0050	1.0	1.0	6.0	1.0	4.0	2.0	0.1	true	0.9	0.0	true	1.0	1.0	0.0010	1.0E-4	2.0	5.0	1.0	ContinuousCorrelated	SingleState	true	0.0	1.0	PoissonProcess	1000	0	1	land380.csv	0	2040706738	true	500	0.5	0	5.0	1.0	0.01	1.0	false	0.0	0.18515539766507946	2.796690389040481E-5	2403.2070558232926	115.69590468675543	2.4037788628173216	0.0	0.0	-7.239419012900588E-4
620	0.0050	1.0	1.0	6.0	1.0	4.0	2.0	0.1	true	0.9	0.0	true	1.0	1.0	0.0010	1.0E-4	2.0	5.0	1.0	ContinuousCorrelated	SingleState	true	0.0	1.0	PoissonProcess	1000	0	1	land383.csv	0	2040709862	true	500	0.5	0	5.0	1.0	0.01	1.0	false	0.0	0.17967256423459824	1.0504405895717392E-5	2570.501895976348	94.36333598672337	2.5710977528327663	0.0	0.0	-0.0025020540967359206
621	0.0050	1.0	1.0	6.0	1.0	4.0	2.0	0.1	true	0.9	0.0	true	1.0	1.0	0.0010	1.0E-4	2.0	5.0	1.0	ContinuousCorrelated	SingleState	true	0.0	1.0	PoissonProcess	1000	0	1	land442.csv	0	2040713043	true	500	0.5	0	5.0	1.0	0.01	1.0	false	0.0	0.14903328621526402	5.122943207131914E-5	2554.942672400678	240.9348319566939	2.5555172617362274	0.0	0.0	-0.0032278839276511186
622	0.0050	1.0	1.0	6.0	1.0	4.0	2.0	0.1	true	0.9	0.0	true	1.0	1.0	0.0010	1.0E-4	2.0	5.0	1.0	ContinuousCorrelated	SingleState	true	0.0	1.0	PoissonProcess	1000	0	1	land444.csv	0	2040715965	true	500	0.5	0	5.0	1.0	0.01	1.0	false	0.0	0.14447509201451597	4.13495404010909E-5	2487.497839652047	193.22849140412913	2.4880712897072454	0.0	0.0	0.001757241010933806
623	0.0050	1.0	1.0	6.0	1.0	4.0	2.0	0.1	true	0.9	0.0	true	1.0	1.0	0.0010	1.0E-4	2.0	5.0	1.0	ContinuousCorrelated	SingleState	true	0.0	1.0	PoissonProcess	1000	0	1	land447.csv	0	2040718953	true	500	0.5	0	5.0	1.0	0.01	1.0	false	0.0	0.17867330114716481	1.3928432724090255E-5	2424.3438897475203	153.0076446600157	2.4249352925345615	0.0	0.0	0.002156828999784029
624	0.0050	1.0	1.0	6.0	1.0	4.0	2.0	0.1	true	0.9	0.0	true	1.0	1.0	0.0010	1.0E-4	2.0	5.0	1.0	ContinuousCorrelated	SingleState	true	0.0	1.0	PoissonProcess	1000	0	1	land498.csv	0	2040722054	true	500	0.5	0	5.0	1.0	0.01	1.0	false	0.0	0.22390080250476224	7.78042778666096E-5	2414.062079907678	118.41655590212707	2.4146620689277563	0.0	0.0	0.0030788175428591385
625	0.0050	1.0	1.0	6.0	1.0	4.0	2.0	0.1	true	0.9	0.0	true	1.0	1.0	0.0010	1.0E-4	2.0	5.0	1.0	ContinuousCorrelated	SingleState	true	0.0	1.0	PoissonProcess	1000	0	1	land500.csv	0	2040724956	true	500	0.5	0	5.0	1.0	0.01	1.0	false	0.0	0.15949937799452055	2.400910397384128E-5	2367.063820144742	824.3123541685097	2.3676343257153074	0.0	0.0	2.761393336026873E-4
626	0.0050	1.0	1.0	6.0	1.0	4.0	2.0	0.1	true	0.9	0.0	true	1.0	1.0	0.0010	1.0E-4	2.0	5.0	1.0	ContinuousCorrelated	SingleState	true	0.0	1.0	PoissonProcess	1000	0	1	land503.csv	0	2040728059	true	500	0.5	0	5.0	1.0	0.01	1.0	false	0.0	0.18402372605697478	1.0191473116332994E-5	2368.3878115938414	84.23499838343851	2.3689611465174463	0.0	0.0	-0.006114967690180476
627	0.0050	1.0	1.0	6.0	1.0	4.0	2.0	0.1	true	0.9	0.0	true	1.0	1.0	0.0010	1.0E-4	2.0	5.0	1.0	ContinuousCorrelated	SingleState	true	0.0	1.0	PoissonProcess	1000	0	1	land562.csv	0	2040731227	true	500	0.5	0	5.0	1.0	0.01	1.0	false	0.0	0.1275145247097516	7.45891299233213E-5	2544.9803746727084	114.83276141506325	2.545577685491192	0.0	0.0	0.006747178154309928
628	0.0050	1.0	1.0	6.0	1.0	4.0	2.0	0.1	true	0.9	0.0	true	1.0	1.0	0.0010	1.0E-4	2.0	5.0	1.0	ContinuousCorrelated	SingleState	true	0.0	1.0	PoissonProcess	1000	0	1	land564.csv	0	2040734073	true	500	0.5	0	5.0	1.0	0.01	1.0	false	0.0	0.18706981445923357	2.2343407354974716E-5	2506.563852736429	207.84878285121525	2.5071344899278785	0.0	0.0	0.0023567396757798015
629	0.0050	1.0	1.0	6.0	1.0	4.0	2.0	0.1	true	0.9	0.0	true	1.0	1.0	0.0010	1.0E-4	2.0	5.0	1.0	ContinuousCorrelated	SingleState	true	0.0	1.0	PoissonProcess	1000	0	1	land567.csv	0	2040737218	true	500	0.5	0	5.0	1.0	0.01	1.0	false	0.0	0.1699676703702779	1.4571890449799082E-5	2464.7856005652425	146.13246886635636	2.465383066954539	0.0	0.0	-0.0024489442952862553
630	0.0050	1.0	1.0	6.0	1.0	4.0	2.0	0.1	true	0.9	0.0	true	1.0	1.0	0.0010	1.0E-4	2.0	5.0	1.0	ContinuousCorrelated	SingleState	true	0.0	1.0	PoissonProcess	1000	0	1	land618.csv	0	2040740405	true	500	0.5	0	5.0	1.0	0.01	1.0	false	0.0	0.20628324154764768	6.592334946859431E-5	2392.1296955701405	90.0241076899809	2.392701544899807	0.0	0.0	-8.695029303522722E-4
631	0.0050	1.0	1.0	6.0	1.0	4.0	2.0	0.1	true	0.9	0.0	true	1.0	1.0	0.0010	1.0E-4	2.0	5.0	1.0	ContinuousCorrelated	SingleState	true	0.0	1.0	PoissonProcess	1000	0	1	land620.csv	0	2040743301	true	500	0.5	0	5.0	1.0	0.01	1.0	false	0.0	0.1663003095858803	2.771912703271054E-5	2526.955838213991	270.34702947938626	2.5275414095037974	0.0	0.0	-0.0010522073487306014
632	0.0050	1.0	1.0	6.0	1.0	4.0	2.0	0.1	true	0.9	0.0	true	1.0	1.0	0.0010	1.0E-4	2.0	5.0	1.0	ContinuousCorrelated	SingleState	true	0.0	1.0	PoissonProcess	1000	0	1	land623.csv	0	2040746392	true	500	0.5	0	5.0	1.0	0.01	1.0	false	0.0	0.17593071870761712	1.0225405759086522E-5	2462.428928613578	77.22673168396959	2.462999342419176	0.0	0.0	-0.002293336418222681
633	0.0050	1.0	1.0	6.0	1.0	4.0	2.0	0.1	true	0.9	0.0	true	1.0	1.0	0.0010	1.0E-4	2.0	5.0	1.0	ContinuousCorrelated	SingleState	true	0.0	1.0	PoissonProcess	1000	0	1	land682.csv	0	2040749623	true	500	0.5	0	5.0	1.0	0.01	1.0	false	0.0	0.07937962020251163	3.308930311139164E-5	2487.385350927209	190.79484232583246	2.48796861233382	0.0	0.0	-0.0011833197761599089
634	0.0050	1.0	1.0	6.0	1.0	4.0	2.0	0.1	true	0.9	0.0	true	1.0	1.0	0.0010	1.0E-4	2.0	5.0	1.0	ContinuousCorrelated	SingleState	true	0.0	1.0	PoissonProcess	1000	0	1	land684.csv	0	2040752528	true	500	0.5	0	5.0	1.0	0.01	1.0	false	0.0	0.21297443364971286	5.659131408169234E-5	2523.4038284154453	167.84356145738585	2.5240037572553353	0.0	0.0	-0.0034647807833159553
635	0.0050	1.0	1.0	6.0	1.0	4.0	2.0	0.1	true	0.9	0.0	true	1.0	1.0	0.0010	1.0E-4	2.0	5.0	1.0	ContinuousCorrelated	SingleState	true	0.0	1.0	PoissonProcess	1000	0	1	land687.csv	0	2040755430	true	500	0.5	0	5.0	1.0	0.01	1.0	false	0.0	0.16761223411088527	9.801479857861406E-6	2413.195442816993	120.3815180846945	2.4137950466853577	0.0	0.0	-0.0026823137604047066
636	0.0050	1.0	1.0	6.0	1.0	4.0	2.0	0.1	true	0.9	0.0	true	1.0	1.0	0.0010	1.0E-4	2.0	5.0	1.0	ContinuousCorrelated	SingleState	true	0.0	1.0	PoissonProcess	1000	0	1	land738.csv	0	2040758616	true	500	0.5	0	5.0	1.0	0.01	1.0	false	0.0	0.15170843567113626	5.905928642333821E-5	2445.769169718616	222.7676650189078	2.446345591767915	0.0	0.0	-0.0030425874483177707
637	0.0050	1.0	1.0	6.0	1.0	4.0	2.0	0.1	true	0.9	0.0	true	1.0	1.0	0.0010	1.0E-4	2.0	5.0	1.0	ContinuousCorrelated	SingleState	true	0.0	1.0	PoissonProcess	1000	0	1	land740.csv	0	2040761464	true	500	0.5	0	5.0	1.0	0.01	1.0	false	0.0	0.17893619280023976	2.4634650008905894E-5	2456.518244221677	467.4445349979185	2.4570931609741167	0.0	0.0	6.501179593680518E-4
638	0.0050	1.0	1.0	6.0	1.0	4.0	2.0	0.1	true	0.9	0.0	true	1.0	1.0	0.0010	1.0E-4	2.0	5.0	1.0	ContinuousCorrelated	SingleState	true	0.0	1.0	PoissonProcess	1000	0	1	land743.csv	0	2040764572	true	500	0.5	0	5.0	1.0	0.01	1.0	false	0.0	0.1881268966453632	1.1481478910427744E-5	2595.092380022685	151.75358843082714	2.5956898377092776	0.0	0.0	-0.009164449476904413
639	0.0050	1.0	1.0	6.0	1.0	4.0	2.0	0.1	true	0.9	0.0	true	1.0	1.0	0.0010	1.0E-4	2.0	5.0	1.0	ContinuousCorrelated	SingleState	true	0.0	1.0	PoissonProcess	1000	0	1	land802.csv	0	2040767710	true	500	0.5	0	5.0	1.0	0.01	1.0	false	0.0	0.06138651887149004	3.575795377603312E-5	2470.24555445333	90.28683593334867	2.4708389925977836	0.0	0.0	-1.448799041483198E-4
640	0.0050	1.0	1.0	6.0	1.0	4.0	2.0	0.1	true	0.9	0.0	true	1.0	1.0	0.0010	1.0E-4	2.0	5.0	1.0	ContinuousCorrelated	SingleState	true	0.0	1.0	PoissonProcess	1000	0	1	land804.csv	0	2040770524	true	500	0.5	0	5.0	1.0	0.01	1.0	false	0.0	0.10674629600705582	3.3323265692623324E-5	2437.4474100174557	516.1739692012984	2.438026018049918	0.0	0.0	0.0036894354240931365
641	0.0050	1.0	1.0	6.0	1.0	4.0	2.0	0.1	true	0.9	0.0	true	1.0	1.0	0.0010	1.0E-4	2.0	5.0	1.0	ContinuousCorrelated	SingleState	true	0.0	1.0	PoissonProcess	1000	0	1	land807.csv	0	2040773481	true	500	0.5	0	5.0	1.0	0.01	1.0	false	0.0	0.15857825258748157	1.3835573116882311E-5	2442.563644042937	164.0273761723024	2.4431478601817203	0.0	0.0	0.0018826208614594888
642	0.0050	1.0	1.0	6.0	1.0	4.0	2.0	0.1	true	0.9	0.0	true	1.0	1.0	0.0010	1.0E-4	2.0	5.0	1.0	ContinuousCorrelated	SingleState	true	0.0	1.0	PoissonProcess	1000	0	1	land858.csv	0	2040776670	true	500	0.5	0	5.0	1.0	0.01	1.0	false	0.0	0.15837663604043914	5.5435404231539464E-5	2508.9763876378624	107.60462189125255	2.5095691231744333	0.0	0.0	-0.0061209205014484186
643	0.0050	1.0	1.0	6.0	1.0	4.0	2.0	0.1	true	0.9	0.0	true	1.0	1.0	0.0010	1.0E-4	2.0	5.0	1.0	ContinuousCorrelated	SingleState	true	0.0	1.0	PoissonProcess	1000	0	1	land860.csv	0	2040779452	true	500	0.5	0	5.0	1.0	0.01	1.0	false	0.0	0.17534308876638882	2.5975845109366817E-5	2408.476663466106	93.52508431080311	2.4090750678920685	0.0	0.0	0.002674208950601198
644	0.0050	1.0	1.0	6.0	1.0	4.0	2.0	0.1	true	0.9	0.0	true	1.0	1.0	0.0010	1.0E-4	2.0	5.0	1.0	ContinuousCorrelated	SingleState	true	0.0	1.0	PoissonProcess	1000	0	1	land863.csv	0	2040782599	true	500	0.5	0	5.0	1.0	0.01	1.0	false	0.0	0.17651924946998157	1.1192604510947722E-5	2460.426701714644	90.73646725684195	2.4610078311573806	0.0	0.0	-3.4559671116164714E-4
645	0.0050	1.0	1.0	6.0	1.0	4.0	2.0	0.1	true	0.9	0.0	true	1.0	1.0	0.0010	1.0E-4	2.0	5.0	1.0	ContinuousCorrelated	SingleState	true	0.0	1.0	PoissonProcess	1000	0	1	land922.csv	0	2040785763	true	500	0.5	0	5.0	1.0	0.01	1.0	false	0.0	0.2577362652248773	7.538855939571533E-5	2341.328053158519	89.01043215792895	2.341901975560414	0.0	0.0	-0.0017449265096864059
646	0.0050	1.0	1.0	6.0	1.0	4.0	2.0	0.1	true	0.9	0.0	true	1.0	1.0	0.0010	1.0E-4	2.0	5.0	1.0	ContinuousCorrelated	SingleState	true	0.0	1.0	PoissonProcess	1000	0	1	land924.csv	0	2040788627	true	500	0.5	0	5.0	1.0	0.01	1.0	false	0.0	0.1910603061073479	2.246217107915957E-5	2530.239276445124	140.04903261794604	2.5308230563595644	0.0	0.0	1.925334030784293E-4
647	0.0050	1.0	1.0	6.0	1.0	4.0	2.0	0.1	true	0.9	0.0	true	1.0	1.0	0.0010	1.0E-4	2.0	5.0	1.0	ContinuousCorrelated	SingleState	true	0.0	1.0	PoissonProcess	1000	0	1	land927.csv	0	2040791707	true	500	0.5	0	5.0	1.0	0.01	1.0	false	0.0	0.18399766586651536	1.5721359290776517E-5	2445.5399658600536	142.9617531760275	2.446132318874018	0.0	0.0	0.004189806702034181
648	0.0050	1.0	1.0	6.0	1.0	4.0	2.0	0.1	true	0.9	0.0	true	1.0	1.0	0.0010	1.0E-4	2.0	5.0	1.0	ContinuousCorrelated	SingleState	true	0.0	1.0	PoissonProcess	1000	0	1	land978.csv	0	2040794774	true	500	0.5	0	5.0	1.0	0.01	1.0	false	0.0	0.19603011122099837	5.3979301836680784E-5	2532.3236169070187	97.31603839874097	2.532922269338258	0.0	0.0	0.001908908997945822
649	0.0050	1.0	1.0	6.0	1.0	4.0	2.0	0.1	true	0.9	0.0	true	1.0	1.0	0.0010	1.0E-4	2.0	5.0	1.0	ContinuousCorrelated	SingleState	true	0.0	1.0	PoissonProcess	1000	0	1	land980.csv	0	2040797667	true	500	0.5	0	5.0	1.0	0.01	1.0	false	0.0	0.1858485303585076	2.286012429115372E-5	2452.223574011278	421.30919729220744	2.4527937560908515	0.0	0.0	-6.942619866747616E-4
650	0.0050	1.0	1.0	6.0	1.0	4.0	2.0	0.1	true	0.9	0.0	true	1.0	1.0	0.0010	1.0E-4	2.0	5.0	1.0	ContinuousCorrelated	SingleState	true	0.0	1.0	PoissonProcess	1000	0	1	land983.csv	0	2040800791	true	500	0.5	0	5.0	1.0	0.01	1.0	false	0.0	0.18272051438194453	1.1104746001386305E-5	2600.499217216198	177.6528988169252	2.6010980859840553	0.0	0.0	1.0006802579817374E-4
651	0.0050	1.0	1.0	6.0	1.0	4.0	2.0	0.1	true	0.9	0.0	true	1.0	1.0	0.0010	1.0E-4	2.0	5.0	1.0	ContinuousCorrelated	SingleState	true	0.0	1.0	PoissonProcess	1000	0	1	land1042.csv	0	2040803989	true	500	0.5	0	5.0	1.0	0.01	1.0	false	0.0	0.27231524063724943	7.318604235931901E-5	2447.566459163872	94.92444561894303	2.44813653304672	0.0	0.0	0.0014714491957911152
652	0.0050	1.0	1.0	6.0	1.0	4.0	2.0	0.1	true	0.9	0.0	true	1.0	1.0	0.0010	1.0E-4	2.0	5.0	1.0	ContinuousCorrelated	SingleState	true	0.0	1.0	PoissonProcess	1000	0	1	land1044.csv	0	2040806855	true	500	0.5	0	5.0	1.0	0.01	1.0	false	0.0	0.193088717519483	3.6336308628900376E-5	2459.2028550523737	168.91734594978232	2.4598028336304187	0.0	0.0	-0.003556043300607983
653	0.0050	1.0	1.0	6.0	1.0	4.0	2.0	0.1	true	0.9	0.0	true	1.0	1.0	0.0010	1.0E-4	2.0	5.0	1.0	ContinuousCorrelated	SingleState	true	0.0	1.0	PoissonProcess	1000	0	1	land1047.csv	0	2040809814	true	500	0.5	0	5.0	1.0	0.01	1.0	false	0.0	0.18111416974782296	1.2040870330484461E-5	2490.3668952865596	173.8872156449447	2.4909668951498625	0.0	0.0	-0.004404323988105331
654	0.0050	1.0	1.0	6.0	1.0	4.0	2.0	0.1	true	0.9	0.0	true	1.0	1.0	0.0010	1.0E-4	2.0	5.0	1.0	ContinuousCorrelated	SingleState	true	0.0	1.0	PoissonProcess	1000	0	1	land1098.csv	0	2040812987	true	500	0.5	0	5.0	1.0	0.01	1.0	false	0.0	0.1891306937791563	5.6150089855008894E-5	2240.5856062818793	112.5003272444662	2.241185132815471	0.0	0.0	-0.0020267874418498115
655	0.0050	1.0	1.0	6.0	1.0	4.0	2.0	0.1	true	0.9	0.0	true	1.0	1.0	0.0010	1.0E-4	2.0	5.0	1.0	ContinuousCorrelated	SingleState	true	0.0	1.0	PoissonProcess	1000	0	1	land1100.csv	0	2040815862	true	500	0.5	0	5.0	1.0	0.01	1.0	false	0.0	0.153447216261188	2.9933733051550796E-5	2570.292966269274	114.36723148177826	2.570889562595715	0.0	0.0	4.3446508888116895E-4
656	0.0050	1.0	1.0	6.0	1.0	4.0	2.0	0.1	true	0.9	0.0	true	1.0	1.0	0.0010	1.0E-4	2.0	5.0	1.0	ContinuousCorrelated	SingleState	true	0.0	1.0	PoissonProcess	1000	0	1	land1103.csv	0	2040818936	true	500	0.5	0	5.0	1.0	0.01	1.0	false	0.0	0.2026363921705859	1.2009531876461264E-5	2379.2642740697015	130.1279224723717	2.379834899714123	0.0	0.0	-6.681807753535886E-4
657	0.0050	1.0	1.0	6.0	1.0	4.0	2.0	0.1	true	0.9	0.0	true	1.0	1.0	0.0010	1.0E-4	2.0	5.0	1.0	ContinuousCorrelated	SingleState	true	0.0	1.0	PoissonProcess	1000	0	1	land1162.csv	0	2040822112	true	500	0.5	0	5.0	1.0	0.01	1.0	false	0.0	0.12116970785515811	5.11828486796978E-5	2474.608681609344	143.26542901710778	2.475186440176369	0.0	0.0	-0.0036935176292290607
658	0.0050	1.0	1.0	6.0	1.0	4.0	2.0	0.1	true	0.9	0.0	true	1.0	1.0	0.0010	1.0E-4	2.0	5.0	1.0	ContinuousCorrelated	SingleState	true	0.0	1.0	PoissonProcess	1000	0	1	land1164.csv	0	2040824965	true	500	0.5	0	5.0	1.0	0.01	1.0	false	0.0	0.15242995469414775	4.5274209115474645E-5	2489.156933725794	283.834999235823	2.489754638150181	0.0	0.0	9.909153790769079E-4
659	0.0050	1.0	1.0	6.0	1.0	4.0	2.0	0.1	true	0.9	0.0	true	1.0	1.0	0.0010	1.0E-4	2.0	5.0	1.0	ContinuousCorrelated	SingleState	true	0.0	1.0	PoissonProcess	1000	0	1	land1167.csv	0	2040827901	true	500	0.5	0	5.0	1.0	0.01	1.0	false	0.0	0.16701227724599582	1.2779460357277546E-5	2474.122478570502	279.239800632402	2.474702803962931	0.0	0.0	0.006306721173971427
660	0.0050	1.0	1.0	6.0	1.0	4.0	2.0	0.1	true	0.9	0.0	true	1.0	1.0	0.0010	1.0E-4	2.0	5.0	1.0	ContinuousCorrelated	SingleState	true	0.0	1.0	PoissonProcess	1000	0	1	land1218.csv	0	2040830998	true	500	0.5	0	5.0	1.0	0.01	1.0	false	0.0	0.1747496762062585	5.660982231866016E-5	2387.7771856295863	262.83027939112	2.3883595702130376	0.0	0.0	-0.0033070518506008086
661	0.0050	1.0	1.0	6.0	1.0	4.0	2.0	0.1	true	0.9	0.0	true	1.0	1.0	0.0010	1.0E-4	2.0	5.0	1.0	ContinuousCorrelated	SingleState	true	0.0	1.0	PoissonProcess	1000	0	1	land1220.csv	0	2040833833	true	500	0.5	0	5.0	1.0	0.01	1.0	false	0.0	0.1790210602971323	2.6283434222503188E-5	2428.736448969265	117.00196017151522	2.429331418702467	0.0	0.0	0.0031119743485062768
662	0.0050	1.0	1.0	6.0	1.0	4.0	2.0	0.1	true	0.9	0.0	true	1.0	1.0	0.0010	1.0E-4	2.0	5.0	1.0	ContinuousCorrelated	SingleState	true	0.0	1.0	PoissonProcess	1000	0	1	land1223.csv	0	2040836974	true	500	0.5	0	5.0	1.0	0.01	1.0	false	0.0	0.18717061031224674	1.1503268366421298E-5	2521.2787357165366	139.1725732008666	2.5218533463740647	0.0	0.0	-0.0021553354236556457
663	0.0050	1.0	1.0	6.0	1.0	4.0	2.0	0.1	true	0.9	0.0	true	1.0	1.0	0.0010	1.0E-4	2.0	5.0	1.0	ContinuousCorrelated	SingleState	true	0.0	1.0	PoissonProcess	1000	0	1	land1282.csv	0	2040840192	true	500	0.5	0	5.0	1.0	0.01	1.0	false	0.0	0.11548281541667431	2.9770961090458623E-5	2467.4805663246743	212.61998440572086	2.468055150635602	0.0	0.0	-9.631817936652675E-4
664	0.0050	1.0	1.0	6.0	1.0	4.0	2.0	0.1	true	0.9	0.0	true	1.0	1.0	0.0010	1.0E-4	2.0	5.0	1.0	ContinuousCorrelated	SingleState	true	0.0	1.0	PoissonProcess	1000	0	1	land1284.csv	0	2040843214	true	500	0.5	0	5.0	1.0	0.01	1.0	false	0.0	0.1781768216049103	1.879543051023443E-5	2359.6859319722644	104.7258636258024	2.360273740708013	0.0	0.0	-4.424388582251267E-4
665	0.0050	1.0	1.0	6.0	1.0	4.0	2.0	0.1	true	0.9	0.0	true	1.0	1.0	0.0010	1.0E-4	2.0	5.0	1.0	ContinuousCorrelated	SingleState	true	0.0	1.0	PoissonProcess	1000	0	1	land1287.csv	0	2040846317	true	500	0.5	0	5.0	1.0	0.01	1.0	false	0.0	0.18599496415014113	1.6133244279923325E-5	2487.8567907056804	108.6181340219295	2.488456747417176	0.0	0.0	-0.001033456321420965
666	0.0050	1.0	1.0	6.0	1.0	4.0	2.0	0.1	true	0.9	0.0	true	1.0	1.0	0.0010	1.0E-4	2.0	5.0	1.0	ContinuousCorrelated	SingleState	true	0.0	1.0	PoissonProcess	1000	0	1	land1338.csv	0	2040849444	true	500	0.5	0	5.0	1.0	0.01	1.0	false	0.0	0.17832078422482595	5.223280580632921E-5	2563.5538555733797	154.01640569180088	2.564131504483578	0.0	0.0	0.0018866208193556774
667	0.0050	1.0	1.0	6.0	1.0	4.0	2.0	0.1	true	0.9	0.0	true	1.0	1.0	0.0010	1.0E-4	2.0	5.0	1.0	ContinuousCorrelated	SingleState	true	0.0	1.0	PoissonProcess	1000	0	1	land1340.csv	0	2040852288	true	500	0.5	0	5.0	1.0	0.01	1.0	false	0.0	0.20133165316223314	2.6144881257512137E-5	2443.577231193186	78.8712119761152	2.4441588419369076	0.0	0.0	-0.001310707181864532
668	0.0050	1.0	1.0	6.0	1.0	4.0	2.0	0.1	true	0.9	0.0	true	1.0	1.0	0.0010	1.0E-4	2.0	5.0	1.0	ContinuousCorrelated	SingleState	true	0.0	1.0	PoissonProcess	1000	0	1	land1343.csv	0	2040855447	true	500	0.5	0	5.0	1.0	0.01	1.0	false	0.0	0.1745157745401122	1.0457132755524887E-5	2370.9855969028945	205.192334732321	2.3715575760182026	0.0	0.0	-0.00144887312994135
669	0.0050	1.0	1.0	6.0	1.0	4.0	2.0	0.1	true	0.9	0.0	true	1.0	1.0	0.0010	1.0E-4	2.0	5.0	1.0	ContinuousCorrelated	SingleState	true	0.0	1.0	PoissonProcess	1000	0	1	land1402.csv	0	2040858605	true	500	0.5	0	5.0	1.0	0.01	1.0	false	0.0	0.10941859590599437	6.586471199832443E-5	2415.456907339106	85.6392834983877	2.4160567922574328	0.0	0.0	0.0016931754266861488
670	0.0050	1.0	1.0	6.0	1.0	4.0	2.0	0.1	true	0.9	0.0	true	1.0	1.0	0.0010	1.0E-4	2.0	5.0	1.0	ContinuousCorrelated	SingleState	true	0.0	1.0	PoissonProcess	1000	0	1	land1404.csv	0	2040861451	true	500	0.5	0	5.0	1.0	0.01	1.0	false	0.0	0.24510706253295886	3.8361474973005385E-5	2481.1939513432617	96.89646977070413	2.4817836776105477	0.0	0.0	4.351815928775147E-4
671	0.0050	1.0	1.0	6.0	1.0	4.0	2.0	0.1	true	0.9	0.0	true	1.0	1.0	0.0010	1.0E-4	2.0	5.0	1.0	ContinuousCorrelated	SingleState	true	0.0	1.0	PoissonProcess	1000	0	1	land1407.csv	0	2040864472	true	500	0.5	0	5.0	1.0	0.01	1.0	false	0.0	0.22135797163226173	1.3547678880413456E-5	2300.9417417108393	159.29829356608604	2.301541653643735	0.0	0.0	3.3744733241332614E-4
672	0.0050	1.0	1.0	6.0	1.0	4.0	2.0	0.1	true	0.9	0.0	true	1.0	1.0	0.0010	1.0E-4	2.0	5.0	1.0	ContinuousCorrelated	SingleState	true	0.0	1.0	PoissonProcess	1000	0	1	land1458.csv	0	2040867597	true	500	0.5	0	5.0	1.0	0.01	1.0	false	0.0	0.16945336698871252	4.420584743164767E-5	2509.696595159766	129.15908913259392	2.5102919782531345	0.0	0.0	0.004282209358815732
673	0.0050	1.0	1.0	6.0	1.0	4.0	2.0	0.1	true	0.9	0.0	true	1.0	1.0	0.0010	1.0E-4	2.0	5.0	1.0	ContinuousCorrelated	SingleState	true	0.0	1.0	PoissonProcess	1000	0	1	land1460.csv	0	2040870520	true	500	0.5	0	5.0	1.0	0.01	1.0	false	0.0	0.15166740971553566	2.1624875280726633E-5	2404.5976090644695	72.23811663168826	2.405169820953581	0.0	0.0	-3.6327308478127597E-4
674	0.0050	1.0	1.0	6.0	1.0	4.0	2.0	0.1	true	0.9	0.0	true	1.0	1.0	0.0010	1.0E-4	2.0	5.0	1.0	ContinuousCorrelated	SingleState	true	0.0	1.0	PoissonProcess	1000	0	1	land1463.csv	0	2040873681	true	500	0.5	0	5.0	1.0	0.01	1.0	false	0.0	0.18342564301940867	1.016926524675211E-5	2334.8465619391204	355.65825276137207	2.3354180812204963	0.0	0.0	0.001270528199876767
675	0.0050	1.0	1.0	6.0	1.0	4.0	2.0	0.1	true	0.9	0.0	true	1.0	1.0	0.0010	1.0E-4	2.0	5.0	1.0	ContinuousCorrelated	SingleState	true	0.0	1.0	PoissonProcess	1000	0	1	land1522.csv	0	2040876814	true	500	0.5	0	5.0	1.0	0.01	1.0	false	0.0	0.22786998435248546	6.255197982350967E-5	2588.9515403298947	120.9417917721559	2.589547473694747	0.0	0.0	0.00736251996093294
676	0.0050	1.0	1.0	6.0	1.0	4.0	2.0	0.1	true	0.9	0.0	true	1.0	1.0	0.0010	1.0E-4	2.0	5.0	1.0	ContinuousCorrelated	SingleState	true	0.0	1.0	PoissonProcess	1000	0	1	land1524.csv	0	2040879754	true	500	0.5	0	5.0	1.0	0.01	1.0	false	0.0	0.13593656279695596	1.9025617116127932E-5	2478.7530432665076	238.27068000367495	2.479324205606832	0.0	0.0	-8.360081657625338E-4
677	0.0050	1.0	1.0	6.0	1.0	4.0	2.0	0.1	true	0.9	0.0	true	1.0	1.0	0.0010	1.0E-4	2.0	5.0	1.0	ContinuousCorrelated	SingleState	true	0.0	1.0	PoissonProcess	1000	0	1	land1527.csv	0	2040882826	true	500	0.5	0	5.0	1.0	0.01	1.0	false	0.0	0.19165334946506024	1.7083009638765892E-5	2414.2338464908985	190.25802758964662	2.4148227910391458	0.0	0.0	6.43396287349143E-5
678	0.0050	1.0	1.0	6.0	1.0	4.0	2.0	0.1	true	0.9	0.0	true	1.0	1.0	0.0010	1.0E-4	2.0	5.0	1.0	ContinuousCorrelated	SingleState	true	0.0	1.0	PoissonProcess	1000	0	1	land1578.csv	0	2040885940	true	500	0.5	0	5.0	1.0	0.01	1.0	false	0.0	0.203262845987478	5.594966887095824E-5	2579.418152262768	116.35218365436573	2.580008635234777	0.0	0.0	-0.002960046250054348
679	0.0050	1.0	1.0	6.0	1.0	4.0	2.0	0.1	true	0.9	0.0	true	1.0	1.0	0.0010	1.0E-4	2.0	5.0	1.0	ContinuousCorrelated	SingleState	true	0.0	1.0	PoissonProcess	1000	0	1	land1580.csv	0	2040888821	true	500	0.5	0	5.0	1.0	0.01	1.0	false	0.0	0.18684781857179436	2.9062947210246772E-5	2446.8617559190866	135.73816869796252	2.4474372153093915	0.0	0.0	-0.0027215147800892566
680	0.0050	1.0	1.0	6.0	1.0	4.0	2.0	0.1	true	0.9	0.0	true	1.0	1.0	0.0010	1.0E-4	2.0	5.0	1.0	ContinuousCorrelated	SingleState	true	0.0	1.0	PoissonProcess	1000	0	1	land1583.csv	0	2040891926	true	500	0.5	0	5.0	1.0	0.01	1.0	false	0.0	0.17630767635833047	1.0056516159614043E-5	2527.122933454911	222.68710598710157	2.527722847597794	0.0	0.0	0.0015602310669953978
681	0.0050	1.0	1.0	6.0	1.0	4.0	2.0	0.1	true	0.9	0.0	true	1.0	1.0	0.0010	1.0E-4	2.0	5.0	1.0	ContinuousCorrelated	SingleState	true	0.0	1.0	PoissonProcess	1000	0	1	land1642.csv	0	2040895082	true	500	0.5	0	5.0	1.0	0.01	1.0	false	0.0	0.20406459891039322	1.0274580195881615E-4	2399.647123239518	289.1568489050403	2.400217188736741	0.0	0.0	-6.040543937592651E-4
682	0.0050	1.0	1.0	6.0	1.0	4.0	2.0	0.1	true	0.9	0.0	true	1.0	1.0	0.0010	1.0E-4	2.0	5.0	1.0	ContinuousCorrelated	SingleState	true	0.0	1.0	PoissonProcess	1000	0	1	land1644.csv	0	2040897908	true	500	0.5	0	5.0	1.0	0.01	1.0	false	0.0	0.18970535163603575	3.77731889863071E-5	2364.4310823682426	307.935358185827	2.365030920276696	0.0	0.0	9.481930868220136E-4
683	0.0050	1.0	1.0	6.0	1.0	4.0	2.0	0.1	true	0.9	0.0	true	1.0	1.0	0.0010	1.0E-4	2.0	5.0	1.0	ContinuousCorrelated	SingleState	true	0.0	1.0	PoissonProcess	1000	0	1	land1647.csv	0	2040900847	true	500	0.5	0	5.0	1.0	0.01	1.0	false	0.0	0.17582809263802718	8.687044555173024E-6	2512.600951160736	186.14323174210887	2.513200875202507	0.0	0.0	0.001337186184497056
684	0.0050	1.0	1.0	6.0	1.0	4.0	2.0	0.1	true	0.9	0.0	true	1.0	1.0	0.0010	1.0E-4	2.0	5.0	1.0	ContinuousCorrelated	SingleState	true	0.0	1.0	PoissonProcess	1000	0	1	land1698.csv	0	2040903966	true	500	0.5	0	5.0	1.0	0.01	1.0	false	0.0	0.16763156724184483	5.714359420119805E-5	2338.4914199518694	130.21665688916036	2.3390775639679564	0.0	0.0	-0.004462209292545682
685	0.0050	1.0	1.0	6.0	1.0	4.0	2.0	0.1	true	0.9	0.0	true	1.0	1.0	0.0010	1.0E-4	2.0	5.0	1.0	ContinuousCorrelated	SingleState	true	0.0	1.0	PoissonProcess	1000	0	1	land1700.csv	0	2040906842	true	500	0.5	0	5.0	1.0	0.01	1.0	false	0.0	0.20430052675763094	3.21206757289135E-5	2575.4973946558684	776.3941573000935	2.576091292499444	0.0	0.0	-0.001810855738698715
686	0.0050	1.0	1.0	6.0	1.0	4.0	2.0	0.1	true	0.9	0.0	true	1.0	1.0	0.0010	1.0E-4	2.0	5.0	1.0	ContinuousCorrelated	SingleState	true	0.0	1.0	PoissonProcess	1000	0	1	land1703.csv	0	2040909896	true	500	0.5	0	5.0	1.0	0.01	1.0	false	0.0	0.18796462403462835	1.072076286889192E-5	2498.6274267170493	216.9439985632446	2.499197838010563	0.0	0.0	-7.724751726748981E-4
687	0.0050	1.0	1.0	6.0	1.0	4.0	2.0	0.1	true	0.9	0.0	true	1.0	1.0	0.0010	1.0E-4	2.0	5.0	1.0	ContinuousCorrelated	SingleState	true	0.0	1.0	PoissonProcess	1000	0	1	land1762.csv	0	2040913062	true	500	0.5	0	5.0	1.0	0.01	1.0	false	0.0	0.2800437044611321	7.850756121456824E-5	2606.014519034814	115.48648563629396	2.6065974936599865	0.0	0.0	0.0013674003145092803
688	0.0050	1.0	1.0	6.0	1.0	4.0	2.0	0.1	true	0.9	0.0	true	1.0	1.0	0.0010	1.0E-4	2.0	5.0	1.0	ContinuousCorrelated	SingleState	true	0.0	1.0	PoissonProcess	1000	0	1	land1764.csv	0	2040915869	true	500	0.5	0	5.0	1.0	0.01	1.0	false	0.0	0.17300694701346453	2.973120973635788E-5	2527.076945343198	124.59809728124047	2.5276502206419362	0.0	0.0	0.0024736912956064574
689	0.0050	1.0	1.0	6.0	1.0	4.0	2.0	0.1	true	0.9	0.0	true	1.0	1.0	0.0010	1.0E-4	2.0	5.0	1.0	ContinuousCorrelated	SingleState	true	0.0	1.0	PoissonProcess	1000	0	1	land1767.csv	0	2040918915	true	500	0.5	0	5.0	1.0	0.01	1.0	false	0.0	0.1952327009619326	1.890647157685156E-5	2489.8201135133195	136.30547930354075	2.4903992307868843	0.0	0.0	-0.0032098675259225108
690	0.0050	1.0	1.0	6.0	1.0	4.0	2.0	0.1	true	0.9	0.0	true	1.0	1.0	0.0010	1.0E-4	2.0	5.0	1.0	ContinuousCorrelated	SingleState	true	0.0	1.0	PoissonProcess	1000	0	1	land1818.csv	0	2040922036	true	500	0.5	0	5.0	1.0	0.01	1.0	false	0.0	0.1669203493465349	5.464162292516823E-5	2457.0337761909427	177.1474871309251	2.4576039929139304	0.0	0.0	-0.005775459341100949
691	0.0050	1.0	1.0	6.0	1.0	4.0	2.0	0.1	true	0.9	0.0	true	1.0	1.0	0.0010	1.0E-4	2.0	5.0	1.0	ContinuousCorrelated	SingleState	true	0.0	1.0	PoissonProcess	1000	0	1	land1820.csv	0	2040924853	true	500	0.5	0	5.0	1.0	0.01	1.0	false	0.0	0.1895530372595256	2.3208325109436763E-5	2520.2269823153333	335.6512606947653	2.5207969955088063	0.0	0.0	-0.0013893858241973594
692	0.0050	1.0	1.0	6.0	1.0	4.0	2.0	0.1	true	0.9	0.0	true	1.0	1.0	0.0010	1.0E-4	2.0	5.0	1.0	ContinuousCorrelated	SingleState	true	0.0	1.0	PoissonProcess	1000	0	1	land1823.csv	0	2040928041	true	500	0.5	0	5.0	1.0	0.01	1.0	false	0.0	0.16893553160542643	1.052669625430687E-5	2375.021977628331	154.16467423059652	2.375599316395345	0.0	0.0	0.0030908303000316186
693	0.0050	1.0	1.0	6.0	1.0	4.0	2.0	0.1	true	0.9	0.0	true	1.0	1.0	0.0010	1.0E-4	2.0	5.0	1.0	ContinuousCorrelated	SingleState	true	0.0	1.0	PoissonProcess	1000	0	1	land1882.csv	0	2040931166	true	500	0.5	0	5.0	1.0	0.01	1.0	false	0.0	0.20022459278470522	1.792471067832805E-4	2548.7671101428355	165.34064016673076	2.549340553963774	0.0	0.0	-0.002709652445064094
694	0.0050	1.0	1.0	6.0	1.0	4.0	2.0	0.1	true	0.9	0.0	true	1.0	1.0	0.0010	1.0E-4	2.0	5.0	1.0	ContinuousCorrelated	SingleState	true	0.0	1.0	PoissonProcess	1000	0	1	land1884.csv	0	2040933897	true	500	0.5	0	5.0	1.0	0.01	1.0	false	0.0	0.21686024671241902	3.7145477037624494E-5	2301.324602645631	154.97161013933788	2.3019245876667904	0.0	0.0	-0.005134088874781132
695	0.0050	1.0	1.0	6.0	1.0	4.0	2.0	0.1	true	0.9	0.0	true	1.0	1.0	0.0010	1.0E-4	2.0	5.0	1.0	ContinuousCorrelated	SingleState	true	0.0	1.0	PoissonProcess	1000	0	1	land1887.csv	0	2040936931	true	500	0.5	0	5.0	1.0	0.01	1.0	false	0.0	0.19529886999288948	7.801765496617482E-6	2432.5947794492545	313.81837198387444	2.4331672924552636	0.0	0.0	-0.001091327015623631
696	0.0050	1.0	1.0	6.0	1.0	4.0	2.0	0.1	true	0.9	0.0	true	1.0	1.0	0.0010	1.0E-4	2.0	5.0	1.0	ContinuousCorrelated	SingleState	true	0.0	1.0	PoissonProcess	1000	0	1	land1938.csv	0	2040940140	true	500	0.5	0	5.0	1.0	0.01	1.0	false	0.0	0.23573231772032816	6.83856778617814E-5	2450.1276318959963	128.17680835996086	2.450718171839156	0.0	0.0	0.001926505989701563
697	0.0050	1.0	1.0	6.0	1.0	4.0	2.0	0.1	true	0.9	0.0	true	1.0	1.0	0.0010	1.0E-4	2.0	5.0	1.0	ContinuousCorrelated	SingleState	true	0.0	1.0	PoissonProcess	1000	0	1	land1940.csv	0	2040942972	true	500	0.5	0	5.0	1.0	0.01	1.0	false	0.0	0.18206445247923983	2.7474718497297084E-5	2409.7123448743478	177.13559050667922	2.4102934376576832	0.0	0.0	-0.0025616367035795106
698	0.0050	1.0	1.0	6.0	1.0	4.0	2.0	0.1	true	0.9	0.0	true	1.0	1.0	0.0010	1.0E-4	2.0	5.0	1.0	ContinuousCorrelated	SingleState	true	0.0	1.0	PoissonProcess	1000	0	1	land1943.csv	0	2040945983	true	500	0.5	0	5.0	1.0	0.01	1.0	false	0.0	0.17736708883916696	1.2238644396990531E-5	2447.98923651039	104.94009272954086	2.4485735211897333	0.0	0.0	0.001611344621879302
699	0.0050	1.0	1.0	6.0	1.0	4.0	2.0	0.1	true	0.9	0.0	true	1.0	1.0	0.0010	1.0E-4	2.0	5.0	1.0	ContinuousCorrelated	SingleState	true	0.0	1.0	PoissonProcess	1000	0	1	land2002.csv	0	2040949166	true	500	0.5	0	5.0	1.0	0.01	1.0	false	0.0	0.2287058648488826	1.0602749214408434E-4	2373.637579228322	254.93455723248763	2.3742338399438654	0.0	0.0	-3.6152447092145174E-4
700	0.0050	1.0	1.0	6.0	1.0	4.0	2.0	0.1	true	0.9	0.0	true	1.0	1.0	0.0010	1.0E-4	2.0	5.0	1.0	ContinuousCorrelated	SingleState	true	0.0	1.0	PoissonProcess	1000	0	1	land2004.csv	0	2040951982	true	500	0.5	0	5.0	1.0	0.01	1.0	false	0.0	0.08481516704640414	6.0055234990202786E-5	2505.992676032173	116.72404756834159	2.5065690180672253	0.0	0.0	-0.0021971716751851933
701	0.0050	1.0	1.0	6.0	1.0	4.0	2.0	0.1	true	0.9	0.0	true	1.0	1.0	0.0010	1.0E-4	2.0	5.0	1.0	ContinuousCorrelated	SingleState	true	0.0	1.0	PoissonProcess	1000	0	1	land2007.csv	0	2040954735	true	500	0.5	0	5.0	1.0	0.01	1.0	false	0.0	0.17621057321575542	1.1306053932667741E-5	2428.182714942672	97.8894950542565	2.428767817616672	0.0	0.0	-0.0029464858817159286
702	0.0050	1.0	1.0	6.0	1.0	4.0	2.0	0.1	true	0.9	0.0	true	1.0	1.0	0.0010	1.0E-4	2.0	5.0	1.0	ContinuousCorrelated	SingleState	true	0.0	1.0	PoissonProcess	1000	0	1	land2058.csv	0	2040957870	true	500	0.5	0	5.0	1.0	0.01	1.0	false	0.0	0.12954338414435593	4.0846320916596704E-5	2407.770947309699	165.17494437569695	2.4083526671128284	0.0	0.0	-0.0032716430324659694
703	0.0050	1.0	1.0	6.0	1.0	4.0	2.0	0.1	true	0.9	0.0	true	1.0	1.0	0.0010	1.0E-4	2.0	5.0	1.0	ContinuousCorrelated	SingleState	true	0.0	1.0	PoissonProcess	1000	0	1	land2060.csv	0	2040960716	true	500	0.5	0	5.0	1.0	0.01	1.0	false	0.0	0.17519461231663183	2.4240955854040987E-5	2549.7474681888716	240.2204073332807	2.5503295517878475	0.0	0.0	-0.0010346755695487062
704	0.0050	1.0	1.0	6.0	1.0	4.0	2.0	0.1	true	0.9	0.0	true	1.0	1.0	0.0010	1.0E-4	2.0	5.0	1.0	ContinuousCorrelated	SingleState	true	0.0	1.0	PoissonProcess	1000	0	1	land2063.csv	0	2040963860	true	500	0.5	0	5.0	1.0	0.01	1.0	false	0.0	0.1726309171503965	1.1278144299921897E-5	2439.9666559340226	100.64659105328303	2.440536656496363	0.0	0.0	-8.201543366004844E-4
705	0.0050	1.0	1.0	6.0	1.0	4.0	2.0	0.1	true	0.9	0.0	true	1.0	1.0	0.0010	1.0E-4	2.0	5.0	1.0	ContinuousCorrelated	SingleState	true	0.0	1.0	PoissonProcess	1000	0	1	land2122.csv	0	2040967034	true	500	0.5	0	5.0	1.0	0.01	1.0	false	0.0	0.30128970902473107	1.4079159579315066E-4	2420.027156030461	112.54155065109022	2.42061807044716	0.0	0.0	-0.0057734991167332226
706	0.0050	1.0	1.0	6.0	1.0	4.0	2.0	0.1	true	0.9	0.0	true	1.0	1.0	0.0010	1.0E-4	2.0	5.0	1.0	ContinuousCorrelated	SingleState	true	0.0	1.0	PoissonProcess	1000	0	1	land2124.csv	0	2040969839	true	500	0.5	0	5.0	1.0	0.01	1.0	false	0.0	0.1134744145081071	3.977252263171386E-5	2491.2314381752303	243.9215098628125	2.4918281153048913	0.0	0.0	0.002438545361880117
707	0.0050	1.0	1.0	6.0	1.0	4.0	2.0	0.1	true	0.9	0.0	true	1.0	1.0	0.0010	1.0E-4	2.0	5.0	1.0	ContinuousCorrelated	SingleState	true	0.0	1.0	PoissonProcess	1000	0	1	land2127.csv	0	2040972764	true	500	0.5	0	5.0	1.0	0.01	1.0	false	0.0	0.18490867125996133	1.224974725243119E-5	2449.919208346506	488.79987081254086	2.4505182812992112	0.0	0.0	0.0035187063874195282
708	0.0050	1.0	1.0	6.0	1.0	4.0	2.0	0.1	true	0.9	0.0	true	1.0	1.0	0.0010	1.0E-4	2.0	5.0	1.0	ContinuousCorrelated	SingleState	true	0.0	1.0	PoissonProcess	1000	0	1	land2178.csv	0	2040975926	true	500	0.5	0	5.0	1.0	0.01	1.0	false	0.0	0.18977139879242727	4.84741354757783E-5	2438.0140542934773	245.4544706181994	2.4385911573708725	0.0	0.0	0.0063297501565352235
709	0.0050	1.0	1.0	6.0	1.0	4.0	2.0	0.1	true	0.9	0.0	true	1.0	1.0	0.0010	1.0E-4	2.0	5.0	1.0	ContinuousCorrelated	SingleState	true	0.0	1.0	PoissonProcess	1000	0	1	land2180.csv	0	2040978751	true	500	0.5	0	5.0	1.0	0.01	1.0	false	0.0	0.15767456979075062	2.345450363065984E-5	2349.560441813836	134.08615761010722	2.3501582017213685	0.0	0.0	-0.0013135423471701902
710	0.0050	1.0	1.0	6.0	1.0	4.0	2.0	0.1	true	0.9	0.0	true	1.0	1.0	0.0010	1.0E-4	2.0	5.0	1.0	ContinuousCorrelated	SingleState	true	0.0	1.0	PoissonProcess	1000	0	1	land2183.csv	0	2040981802	true	500	0.5	0	5.0	1.0	0.01	1.0	false	0.0	0.17849751383128212	1.1611721809096488E-5	2394.68786931697	163.65737943660696	2.395257870221911	0.0	0.0	-0.0017980348282731406
711	0.0050	1.0	1.0	6.0	1.0	4.0	2.0	0.1	true	0.9	0.0	true	1.0	1.0	0.0010	1.0E-4	2.0	5.0	1.0	ContinuousCorrelated	SingleState	true	0.0	1.0	PoissonProcess	1000	0	1	land2242.csv	0	2040984976	true	500	0.5	0	5.0	1.0	0.01	1.0	false	0.0	0.22200140702188567	1.0535618549546782E-4	2451.698304451983	96.85145862239266	2.4522942374724215	0.0	0.0	-0.007016083664657183
712	0.0050	1.0	1.0	6.0	1.0	4.0	2.0	0.1	true	0.9	0.0	true	1.0	1.0	0.0010	1.0E-4	2.0	5.0	1.0	ContinuousCorrelated	SingleState	true	0.0	1.0	PoissonProcess	1000	0	1	land2244.csv	0	2040987753	true	500	0.5	0	5.0	1.0	0.01	1.0	false	0.0	0.1923579036216002	2.9880472428614117E-5	2418.84924886572	134.72856306134437	2.4194196854918615	0.0	0.0	-0.0036130933370236173
713	0.0050	1.0	1.0	6.0	1.0	4.0	2.0	0.1	true	0.9	0.0	true	1.0	1.0	0.0010	1.0E-4	2.0	5.0	1.0	ContinuousCorrelated	SingleState	true	0.0	1.0	PoissonProcess	1000	0	1	land2247.csv	0	2040990771	true	500	0.5	0	5.0	1.0	0.01	1.0	false	0.0	0.18686449038991262	1.0009724494758808E-5	2445.8688499944774	139.45682525883706	2.446462403557354	0.0	0.0	-0.001886993235777406
714	0.0050	1.0	1.0	6.0	1.0	4.0	2.0	0.1	true	0.9	0.0	true	1.0	1.0	0.0010	1.0E-4	2.0	5.0	1.0	ContinuousCorrelated	SingleState	true	0.0	1.0	PoissonProcess	1000	0	1	land2298.csv	0	2040993829	true	500	0.5	0	5.0	1.0	0.01	1.0	false	0.0	0.18032833100357085	5.1218160856332957E-5	2536.4083738720674	106.36083225922131	2.5369959151830903	0.0	0.0	-1.0847956686565946E-4
715	0.0050	1.0	1.0	6.0	1.0	4.0	2.0	0.1	true	0.9	0.0	true	1.0	1.0	0.0010	1.0E-4	2.0	5.0	1.0	ContinuousCorrelated	SingleState	true	0.0	1.0	PoissonProcess	1000	0	1	land2300.csv	0	2040996751	true	500	0.5	0	5.0	1.0	0.01	1.0	false	0.0	0.2064896631385103	2.9441398542483942E-5	2403.914902550284	75.80575606399576	2.4045105306199415	0.0	0.0	-0.0010360237587707514
716	0.0050	1.0	1.0	6.0	1.0	4.0	2.0	0.1	true	0.9	0.0	true	1.0	1.0	0.0010	1.0E-4	2.0	5.0	1.0	ContinuousCorrelated	SingleState	true	0.0	1.0	PoissonProcess	1000	0	1	land2303.csv	0	2040999839	true	500	0.5	0	5.0	1.0	0.01	1.0	false	0.0	0.1769298381168229	9.477030951666146E-6	2400.072241208873	410.1456530220816	2.400643589978353	0.0	0.0	-4.8750673356178474E-4
717	0.0050	1.0	1.0	6.0	1.0	4.0	2.0	0.1	true	0.9	0.0	true	1.0	1.0	0.0010	1.0E-4	2.0	5.0	1.0	ContinuousCorrelated	SingleState	true	0.0	1.0	PoissonProcess	1000	0	1	land2362.csv	0	2041002969	true	500	0.5	0	5.0	1.0	0.01	1.0	false	0.0	0.14650475506619032	4.037088601498831E-5	2496.3472899316635	119.84624614484318	2.49692228787768	0.0	0.0	0.0013225113068331834
718	0.0050	1.0	1.0	6.0	1.0	4.0	2.0	0.1	true	0.9	0.0	true	1.0	1.0	0.0010	1.0E-4	2.0	5.0	1.0	ContinuousCorrelated	SingleState	true	0.0	1.0	PoissonProcess	1000	0	1	land2364.csv	0	2041005871	true	500	0.5	0	5.0	1.0	0.01	1.0	false	0.0	0.20744407887359853	5.9484682682716505E-5	2472.5291481370623	235.5229191402418	2.4731254965585956	0.0	0.0	7.988220349998425E-4
719	0.0050	1.0	1.0	6.0	1.0	4.0	2.0	0.1	true	0.9	0.0	true	1.0	1.0	0.0010	1.0E-4	2.0	5.0	1.0	ContinuousCorrelated	SingleState	true	0.0	1.0	PoissonProcess	1000	0	1	land2367.csv	0	2041008769	true	500	0.5	0	5.0	1.0	0.01	1.0	false	0.0	0.18462924474808945	1.1451159126032014E-5	2543.488551474193	93.66290731884979	2.5440780995264616	0.0	0.0	7.185662684309432E-4
[truncated: 11 more columns]
